# Supplementary material
Source: publisher figshare collection journal article supplement (https://acs.figshare.com/ndownloader/files/9413767)
Supplement: Supplementary file 1 [file 9413767]

data_13102 
_audit_creation_date        "13-10-16"
_audit_creation_method CRYSTALS_ver_14.40

_oxford_structure_analysis_title  'mo_13102_0m in P-1'
_chemical_name_systematic         ?
_chemical_melting_point           ?
_cell_length_a                    11.4756(3)
_cell_length_b                    12.1783(3)
_cell_length_c                    17.3054(5)
_cell_angle_alpha                 82.9470(10)
_cell_angle_beta                  81.975(2)
_cell_angle_gamma                 64.9910(10)
_cell_volume                      2164.78(10)
 
_symmetry_cell_setting            'triclinic' 
_symmetry_space_group_name_H-M    'P -1 ' 
_symmetry_space_group_name_Hall   ? 
loop_
 _symmetry_equiv_pos_as_xyz
 'x,y,z'
 '-x,-y,-z'

loop_
_atom_type_symbol
_atom_type_scat_dispersion_real
_atom_type_scat_dispersion_imag
_atom_type_scat_Cromer_Mann_a1
_atom_type_scat_Cromer_Mann_b1
_atom_type_scat_Cromer_Mann_a2
_atom_type_scat_Cromer_Mann_b2
_atom_type_scat_Cromer_Mann_a3
_atom_type_scat_Cromer_Mann_b3
_atom_type_scat_Cromer_Mann_a4
_atom_type_scat_Cromer_Mann_b4
_atom_type_scat_Cromer_Mann_c
_atom_type_scat_source  
 C       0.0033   0.0016   2.3100  20.8439   1.0200  10.2075   1.5886   0.5687
   0.8650  51.6512   0.2156 'International Tables Vol C 4.2.6.8 and 6.1.1.4'
 H       0.0000   0.0000   0.4930  10.5109   0.3229  26.1257   0.1402   3.1424
   0.0408  57.7998   0.0030 'International Tables Vol C 4.2.6.8 and 6.1.1.4'
 B       0.0013   0.0007   2.0545  23.2185   1.3326   1.0210   1.0979  60.3498
   0.7068   0.1403  -0.1932 'International Tables Vol C 4.2.6.8 and 6.1.1.4'
 N       0.0061   0.0033  12.2126   0.0057   3.1322   9.8933   2.0125  28.9975
   1.1663   0.5826 -11.5290 'International Tables Vol C 4.2.6.8 and 6.1.1.4'
 Cl      0.1484   0.1585  11.4604   0.0104   7.1964   1.1662   6.2556  18.5194
   1.6455  47.7784  -9.5574 'International Tables Vol C 4.2.6.8 and 6.1.1.4'
 Fe      0.3463   0.8444  11.7695   4.7611   7.3573   0.3072   3.5222  15.3535
   2.3045  76.8805   1.0369 'International Tables Vol C 4.2.6.8 and 6.1.1.4'
 
 
_cell_formula_units_Z                    2

# Given Formula = C43.50 H61.50 B1 Cl1 Fe1 N6 
# Dc =      1.18 Fooo =    825.00 Mu =      4.46 M =    770.62
# Found Formula = C43.50 H61.50 B1 Cl1 Fe1 N6 
# Dc =      1.18 FOOO =    825.00 Mu =      4.46 M =    770.62

_chemical_formula_sum             'C43.50 H61.50 B1 Cl1 Fe1 N6'
_chemical_formula_moiety          'C43.50 H61.50 B1 Cl1 Fe1 N6'
_chemical_compound_source                ?
_chemical_formula_weight            770.62
 
 
_cell_measurement_reflns_used         9974
_cell_measurement_theta_min              3
_cell_measurement_theta_max             29
_cell_measurement_temperature          150
 
_exptl_crystal_description        'prism' 
_exptl_crystal_colour             'colorless' 
_exptl_crystal_size_min           0.324 
_exptl_crystal_size_mid           0.536 
_exptl_crystal_size_max           0.593 
 
_exptl_crystal_density_diffrn     1.182 
_exptl_crystal_density_meas       ? 
_exptl_crystal_density_method     'not measured' 
# Non-dispersive F(000): 
_exptl_crystal_F_000              825 
_exptl_absorpt_coefficient_mu     0.446 
 
# Sheldrick geometric approximatio 0.79 0.87 
# No experimental values of Tmin/max available 
_exptl_absorpt_correction_type    numerical 
_exptl_absorpt_process_details 
; 
 Analytical Absorption (De Meulenaer & Tompa, 1965) 
; 
_exptl_absorpt_correction_T_min   0.79 
_exptl_absorpt_correction_T_max   0.87 
_diffrn_measurement_device_type   'Bruker Kappa Apex2' 
_diffrn_measurement_device        'Area' 
_diffrn_radiation_monochromator   'graphite' 
_diffrn_radiation_type            'Mo K\a'
_diffrn_radiation_wavelength           0.71073
_diffrn_measurement_method        '\f & \w scans' 
 
# If a reference occurs more than once, delete the author 
# and date from subsequent references. 
_computing_data_collection        'Apex2 (Bruker AXS, 2006)' 
_computing_cell_refinement        'Apex2 (Bruker AXS, 2006)' 
_computing_data_reduction         'USER DEFINED DATA REDUCTION' 
_computing_structure_solution     'Superflip (Palatinus & Chapuis, 2007)' 
_computing_structure_refinement   'CRYSTALS (Betteridge et al., 2003)' 
_computing_publication_material   'CRYSTALS (Betteridge et al., 2003)' 
_computing_molecular_graphics     'CAMERON (Watkin et al., 1996)' 
 
_diffrn_standards_interval_time   . 
_diffrn_standards_interval_count  . 
_diffrn_standards_number          0 
_diffrn_standards_decay_%         ? 
 
_diffrn_ambient_temperature        150
_diffrn_reflns_number             44162 
_reflns_number_total              11275 
_diffrn_reflns_av_R_equivalents   0.028 
# Number of reflections without Friedels Law is 0 
# Number of reflections with Friedels Law is 11275 
# Theoretical number of reflections is about 22629 
 
 
_diffrn_reflns_theta_min          1.850 
_diffrn_reflns_theta_max          28.817 
_diffrn_measured_fraction_theta_max 0.996 
 
_diffrn_reflns_theta_full         28.817 
_diffrn_measured_fraction_theta_full 0.996 
 
 
_diffrn_reflns_limit_h_min        -15 
_diffrn_reflns_limit_h_max        15 
_diffrn_reflns_limit_k_min        -16 
_diffrn_reflns_limit_k_max        16 
_diffrn_reflns_limit_l_min        -23 
_diffrn_reflns_limit_l_max        23 
_reflns_limit_h_min               -15 
_reflns_limit_h_max               15 
_reflns_limit_k_min               -16 
_reflns_limit_k_max               16 
_reflns_limit_l_min               0 
_reflns_limit_l_max               23 
 
_oxford_diffrn_Wilson_B_factor    1.90 
_oxford_diffrn_Wilson_scale       56.68 
 
_atom_sites_solution_primary      Other  #heavy,direct,difmap,geom
# _atom_sites_solution_secondary  difmap
_atom_sites_solution_hydrogens    difmap
 
_refine_diff_density_min          -0.66 
_refine_diff_density_max          1.73 
 
 
# The current dictionary definitions do not cover the 
# situation where the reflections used for refinement were 
# selected by a user-defined sigma threshold 
 
 
# The values actually used during refinement 
_oxford_reflns_threshold_expression_ref     I>0.0\s(I)
_refine_ls_number_reflns          11236 
_refine_ls_number_restraints      62 
_refine_ls_number_parameters      452 
_oxford_refine_ls_R_factor_ref    0.0499 
_refine_ls_wR_factor_ref          0.1175 
_refine_ls_goodness_of_fit_ref    0.9964 
_refine_ls_shift/su_max           0.0419843 
_refine_ls_shift/su_mean          0.0016558 
 
 
# The values computed with all filters except I/sigma 
_oxford_reflns_number_all         11237 
_refine_ls_R_factor_all           0.0499 
_refine_ls_wR_factor_all          0.1175 
 
# The values computed with a 2 sigma cutoff - a la SHELX 
_reflns_threshold_expression      I>2.0\s(I)
_reflns_number_gt                 9792 
_refine_ls_R_factor_gt            0.0431 
_refine_ls_wR_factor_gt           0.1102 
 
# choose from: rm (reference molecule of known chirality), 
# ad (anomolous dispersion - Flack), rmad (rm and ad), 
# syn (from synthesis), unk (unknown) or . (not applicable). 
_chemical_absolute_configuration  '.' 
 
 
_refine_ls_structure_factor_coef  Fsqd 
_refine_ls_matrix_type            full
_refine_ls_hydrogen_treatment     constr         #undef, noref, refall,
                                                 # refxyz, refU, constr or mixed
_refine_ls_weighting_scheme       calc 
_refine_ls_weighting_details 
;
 Method= Modified Sheldrick 
 w=1/[\s^2^(F^2^) + ( 0.06P)^2^ + 1.72P] 
 ,where P=(max(Fo^2^,0) + 2Fc^2^)/3 
;
# Insert your own references if required - in alphabetical order 
_publ_section_references 
; 
User defined data reduction 
 
Betteridge, P.W., Carruthers, J.R., Cooper, R.I., 
Prout, K. & Watkin, D.J. (2003). J. Appl. Cryst. 36, 1487. 
 
Bruker Analytical X-ray Systems, Inc., 2006. <i>Apex2</i>, 
Version 2 User Manual, M86-E01078, Madison, WI. 
 
De Meulenaer, J. & Tompa, H. (1965). Acta Cryst. 19, 1014. 
 
Palatinus, L. & Chapuis, G. (2007). J. Appl. Cryst. 40, 786-790. 
 
Watkin, D.J., Prout, C.K. & Pearce, L.J. (1996). CAMERON, Chemical 
Crystallography Laboratory, Oxford, UK. 
; 

# Uequiv = arithmetic mean of Ui i.e. Ueqiv = (U1+U2+U3)/3

# Replace last . with number of unfound hydrogen atoms attached to an atom.

# ..._refinement_flags_... 
# . no refinement constraints           S special position constraint on site
# G rigid group refinement of site      R riding atom
# D distance or angle restraint on site T thermal displacement constraints
# U Uiso or Uij restraint (rigid bond)  P partial occupancy constraint


loop_
_atom_site_label
_atom_site_type_symbol
_atom_site_fract_x
_atom_site_fract_y
_atom_site_fract_z
_atom_site_U_iso_or_equiv
_atom_site_occupancy
_atom_site_adp_type
_atom_site_refinement_flags_posn
_atom_site_refinement_flags_adp
_atom_site_refinement_flags_occupancy
_atom_site_disorder_assembly
_atom_site_disorder_group
_atom_site_attached_hydrogens
Fe1 Fe 0.66610(2) 0.788122(19) 0.298130(12) 0.0188 1.0000 Uani . . . . . . 
Cl1 Cl 0.47961(4) 0.95372(4) 0.32313(3) 0.0350 1.0000 Uani . . . . . . 
N4 N 0.85713(12) 0.75134(11) 0.43016(7) 0.0195 1.0000 Uani . . . . . . 
N7 N 0.92778(12) 0.63756(11) 0.33206(7) 0.0187 1.0000 Uani . . . . . . 
N9 N 0.88794(12) 0.66392(11) 0.18675(7) 0.0194 1.0000 Uani . . . . . . 
N11 N 0.76610(13) 0.81493(12) 0.11375(7) 0.0213 1.0000 Uani . . . . . . 
N20 N 0.81651(12) 0.52559(11) 0.27823(7) 0.0196 1.0000 Uani . . . . . . 
N22 N 0.62022(13) 0.54131(12) 0.30580(8) 0.0235 1.0000 Uani . . . . . . 
C1 C 0.82296(14) 0.73172(13) 0.36282(9) 0.0196 1.0000 Uani . . . . . . 
C2 C 1.02661(14) 0.60024(13) 0.38052(9) 0.0200 1.0000 Uani . . . . . . 
C3 C 0.98393(14) 0.67054(13) 0.44218(9) 0.0196 1.0000 Uani . . . . . . 
C4 C 1.05284(16) 0.66843(16) 0.51029(9) 0.0258 1.0000 Uani . . . . . . 
C5 C 1.0789(2) 0.78192(19) 0.50813(15) 0.0441 1.0000 Uani . . . . . . 
C6 C 1.17838(17) 0.55403(16) 0.51412(10) 0.0297 1.0000 Uani . . . . . . 
C7 C 0.76712(15) 0.83928(14) 0.48627(9) 0.0242 1.0000 Uani . . . . . . 
C8 C 0.72726(19) 0.96925(16) 0.45093(12) 0.0360 1.0000 Uani . . . . . . 
C9 C 0.65148(17) 0.81028(18) 0.51504(11) 0.0321 1.0000 Uani . . . . . . 
C10 C 0.77753(14) 0.76770(13) 0.18942(9) 0.0197 1.0000 Uani . . . . . . 
C11 C 0.94174(15) 0.64594(14) 0.10989(9) 0.0225 1.0000 Uani . . . . . . 
C12 C 0.86729(16) 0.74047(15) 0.06348(9) 0.0242 1.0000 Uani . . . . . . 
C13 C 0.8815(2) 0.76514(18) -0.02383(10) 0.0371 1.0000 Uani . . . . . . 
C14 C 0.7857(3) 0.7398(2) -0.06343(13) 0.0542 1.0000 Uani . . . . . . 
C15 C 1.0189(3) 0.6897(3) -0.05798(12) 0.0540 1.0000 Uani . . . . . . 
C16 C 0.66086(18) 0.93056(15) 0.08947(10) 0.0281 1.0000 Uani . . . . . . 
C17 C 0.6608(2) 1.03481(16) 0.12946(13) 0.0402 1.0000 Uani . . . . . . 
C18 C 0.53149(19) 0.92180(19) 0.10384(12) 0.0387 1.0000 Uani . . . . . . 
C19 C 0.69343(14) 0.60570(14) 0.29891(9) 0.0219 1.0000 Uani . . . . . . 
C20 C 0.81704(15) 0.41349(14) 0.26993(9) 0.0224 1.0000 Uani . . . . . . 
C21 C 0.69496(16) 0.42122(14) 0.28770(10) 0.0241 1.0000 Uani . . . . . . 
C22 C 0.64251(18) 0.32699(17) 0.28993(12) 0.0332 1.0000 Uani . . . . . . 
C23 C 0.6046(2) 0.2868(2) 0.37331(14) 0.0452 1.0000 Uani . . . . . . 
C24 C 0.7409(3) 0.2165(2) 0.24859(18) 0.0559 1.0000 Uani . . . . . . 
C25 C 0.47921(17) 0.59484(17) 0.32758(14) 0.0378 1.0000 Uani . . . . . . 
C26 C 0.4494(2) 0.6510(2) 0.40545(17) 0.0577 1.0000 Uani . . . . . . 
C27 C 0.4085(2) 0.6835(2) 0.26260(19) 0.0585 1.0000 Uani . . . . . . 
C28 C 1.07454(14) 0.46675(14) 0.24505(9) 0.0207 1.0000 Uani . . . . . . 
C29 C 1.11639(16) 0.34779(14) 0.27964(9) 0.0243 1.0000 Uani . . . . . . 
C30 C 1.24659(17) 0.26713(16) 0.27619(11) 0.0312 1.0000 Uani . . . . . . 
C31 C 1.33946(17) 0.30322(18) 0.23729(12) 0.0362 1.0000 Uani . . . . . . 
C32 C 1.30252(17) 0.42028(19) 0.20319(12) 0.0345 1.0000 Uani . . . . . . 
C33 C 1.17246(16) 0.50079(16) 0.20782(10) 0.0272 1.0000 Uani . . . . . . 
C34 C 0.5804(6) 0.5218(6) 0.0452(3) 0.1276(17) 1.0000 Uiso D . . . . . 
C35 C 0.5953(7) 0.4123(7) 0.0341(4) 0.161(2) 1.0000 Uiso D . . . . . 
C36 C 0.4861(7) 0.6134(7) 0.0119(4) 0.168(3) 1.0000 Uiso D . . . . . 
C37 C 0.6501(6) 0.5533(6) 0.0852(4) 0.0637(14) 0.5000 Uiso . . . . . . 
C38 C 0.1098(4) 0.9708(4) 0.2575(2) 0.0503(13) 0.476(5) Uiso D . P 1 1 . 
C39 C 0.1958(4) 0.9760(5) 0.1990(3) 0.0444(13) 0.476(5) Uiso D . P 1 1 . 
C40 C 0.2058(5) 0.9242(5) 0.1284(3) 0.0603(16) 0.476(5) Uiso D . P 1 1 . 
C41 C 0.1263(6) 0.8719(7) 0.1199(3) 0.078(2) 0.476(5) Uiso D . P 1 1 . 
C42 C 0.0388(5) 0.8676(6) 0.1752(3) 0.0594(15) 0.476(5) Uiso D . P 1 1 . 
C43 C 0.0289(5) 0.9136(6) 0.2466(3) 0.0590(15) 0.476(5) Uiso D . P 1 1 . 
C44 C 0.1045(5) 1.0160(6) 0.3331(3) 0.0629(16) 0.476(5) Uiso D . P 1 1 . 
C381 C 0.1154(5) 0.9134(5) 0.1509(2) 0.0685(16) 0.524(5) Uiso D . P 1 2 . 
C391 C 0.1806(5) 0.9682(5) 0.1775(3) 0.0615(15) 0.524(5) Uiso D . P 1 2 . 
C401 C 0.1557(7) 0.9981(7) 0.2548(3) 0.090(2) 0.524(5) Uiso D . P 1 2 . 
C411 C 0.0742(7) 0.9662(7) 0.3031(3) 0.093(2) 0.524(5) Uiso D . P 1 2 . 
C421 C 0.0137(6) 0.9068(6) 0.2803(3) 0.0754(18) 0.524(5) Uiso D . P 1 2 . 
C431 C 0.0313(5) 0.8802(5) 0.2039(3) 0.0549(13) 0.524(5) Uiso D . P 1 2 . 
C441 C 0.1439(9) 0.8767(9) 0.0693(4) 0.129(4) 0.524(5) Uiso D . P 1 2 . 
B1 B 0.92917(16) 0.57012(15) 0.25947(10) 0.0186 1.0000 Uani . . . . . . 
H21 H 1.1098 0.5360 0.3720 0.0234 1.0000 Uiso R . . . . . 
H41 H 0.9985 0.6660 0.5566 0.0310 1.0000 Uiso R . . . . . 
H51 H 1.1226 0.7774 0.5520 0.0545 1.0000 Uiso R . . . . . 
H52 H 1.1307 0.7880 0.4613 0.0545 1.0000 Uiso R . . . . . 
H53 H 0.9988 0.8514 0.5098 0.0545 1.0000 Uiso R . . . . . 
H61 H 1.2201 0.5540 0.5578 0.0357 1.0000 Uiso R . . . . . 
H62 H 1.2333 0.5527 0.4674 0.0357 1.0000 Uiso R . . . . . 
H63 H 1.1600 0.4843 0.5193 0.0357 1.0000 Uiso R . . . . . 
H71 H 0.8120 0.8317 0.5301 0.0280 1.0000 Uiso R . . . . . 
H81 H 0.6702 1.0245 0.4877 0.0422 1.0000 Uiso R . . . . . 
H82 H 0.8014 0.9859 0.4364 0.0422 1.0000 Uiso R . . . . . 
H83 H 0.6846 0.9780 0.4058 0.0422 1.0000 Uiso R . . . . . 
H91 H 0.5950 0.8672 0.5510 0.0388 1.0000 Uiso R . . . . . 
H92 H 0.6804 0.7307 0.5401 0.0388 1.0000 Uiso R . . . . . 
H93 H 0.6069 0.8144 0.4717 0.0388 1.0000 Uiso R . . . . . 
H111 H 1.0178 0.5786 0.0930 0.0269 1.0000 Uiso R . . . . . 
H131 H 0.8652 0.8484 -0.0352 0.0449 1.0000 Uiso R . . . . . 
H141 H 0.7972 0.7557 -0.1184 0.0644 1.0000 Uiso R . . . . . 
H142 H 0.7002 0.7905 -0.0441 0.0644 1.0000 Uiso R . . . . . 
H143 H 0.7999 0.6570 -0.0520 0.0644 1.0000 Uiso R . . . . . 
H151 H 1.0259 0.7062 -0.1131 0.0666 1.0000 Uiso R . . . . . 
H152 H 1.0786 0.7091 -0.0359 0.0666 1.0000 Uiso R . . . . . 
H153 H 1.0375 0.6061 -0.0461 0.0666 1.0000 Uiso R . . . . . 
H161 H 0.6769 0.9457 0.0347 0.0339 1.0000 Uiso R . . . . . 
H171 H 0.5922 1.1084 0.1135 0.0483 1.0000 Uiso R . . . . . 
H172 H 0.7408 1.0413 0.1153 0.0483 1.0000 Uiso R . . . . . 
H173 H 0.6495 1.0200 0.1846 0.0483 1.0000 Uiso R . . . . . 
H181 H 0.4657 0.9973 0.0877 0.0474 1.0000 Uiso R . . . . . 
H182 H 0.5143 0.9036 0.1580 0.0474 1.0000 Uiso R . . . . . 
H183 H 0.5333 0.8595 0.0749 0.0474 1.0000 Uiso R . . . . . 
H201 H 0.8906 0.3429 0.2546 0.0261 1.0000 Uiso R . . . . . 
H221 H 0.5676 0.3606 0.2624 0.0389 1.0000 Uiso R . . . . . 
H231 H 0.5716 0.2274 0.3723 0.0554 1.0000 Uiso R . . . . . 
H232 H 0.6785 0.2534 0.4017 0.0554 1.0000 Uiso R . . . . . 
H233 H 0.5403 0.3554 0.3979 0.0554 1.0000 Uiso R . . . . . 
H241 H 0.7068 0.1574 0.2501 0.0682 1.0000 Uiso R . . . . . 
H242 H 0.8173 0.1831 0.2746 0.0682 1.0000 Uiso R . . . . . 
H243 H 0.7604 0.2401 0.1957 0.0682 1.0000 Uiso R . . . . . 
H251 H 0.4512 0.5309 0.3338 0.0435 1.0000 Uiso R . . . . . 
H261 H 0.3586 0.6850 0.4189 0.0683 1.0000 Uiso R . . . . . 
H262 H 0.4800 0.7129 0.4015 0.0683 1.0000 Uiso R . . . . . 
H263 H 0.4905 0.5902 0.4447 0.0683 1.0000 Uiso R . . . . . 
H271 H 0.3180 0.7174 0.2774 0.0718 1.0000 Uiso R . . . . . 
H272 H 0.4380 0.7464 0.2534 0.0718 1.0000 Uiso R . . . . . 
H273 H 0.4262 0.6425 0.2162 0.0718 1.0000 Uiso R . . . . . 
H291 H 1.0538 0.3210 0.3061 0.0289 1.0000 Uiso R . . . . . 
H301 H 1.2713 0.1874 0.3007 0.0364 1.0000 Uiso R . . . . . 
H311 H 1.4281 0.2484 0.2346 0.0411 1.0000 Uiso R . . . . . 
H321 H 1.3656 0.4459 0.1760 0.0417 1.0000 Uiso R . . . . . 
H331 H 1.1488 0.5814 0.1849 0.0326 1.0000 Uiso R . . . . . 
H351 H 0.6534 0.3484 0.0654 0.1947 1.0000 Uiso R . . . . . 
H361 H 0.4602 0.6925 0.0286 0.2165 1.0000 Uiso R . . . . . 
H391 H 0.2476 1.0179 0.2043 0.0528 0.476(5) Uiso R . P 1 1 . 
H401 H 0.2732 0.9212 0.0888 0.0657 0.476(5) Uiso R . P 1 1 . 
H411 H 0.1282 0.8447 0.0704 0.1273 0.476(5) Uiso R . P 1 1 . 
H421 H -0.0162 0.8297 0.1687 0.0805 0.476(5) Uiso R . P 1 1 . 
H431 H -0.0302 0.9061 0.2889 0.0642 0.476(5) Uiso R . P 1 1 . 
H441 H 0.0385 1.0048 0.3683 0.0714 0.476(5) Uiso R . P 1 1 . 
H442 H 0.0879 1.0997 0.3272 0.0714 0.476(5) Uiso R . P 1 1 . 
H443 H 0.1857 0.9707 0.3532 0.0714 0.476(5) Uiso R . P 1 1 . 
H3911 H 0.2452 0.9825 0.1425 0.0934 0.524(5) Uiso R . P 1 2 . 
H4011 H 0.2021 1.0380 0.2717 0.1259 0.524(5) Uiso R . P 1 2 . 
H4111 H 0.0537 0.9941 0.3543 0.1283 0.524(5) Uiso R . P 1 2 . 
H4211 H -0.0415 0.8820 0.3172 0.0927 0.524(5) Uiso R . P 1 2 . 
H4311 H -0.0119 0.8366 0.1878 0.0732 0.524(5) Uiso R . P 1 2 . 
H4411 H 0.0873 0.8414 0.0614 0.1504 0.524(5) Uiso R . P 1 2 . 
H4412 H 0.1298 0.9462 0.0339 0.1504 0.524(5) Uiso R . P 1 2 . 
H4413 H 0.2309 0.8192 0.0605 0.1504 0.524(5) Uiso R . P 1 2 . 
H371 H 0.6222 0.6390 0.0792 0.0823 0.5000 Uiso R . . . . . 
H372 H 0.7398 0.5151 0.0688 0.0823 0.5000 Uiso R . . . . . 
H373 H 0.6350 0.5292 0.1386 0.0823 0.5000 Uiso R . . . . . 
loop_
_atom_site_aniso_label
_atom_site_aniso_U_11
_atom_site_aniso_U_22
_atom_site_aniso_U_33
_atom_site_aniso_U_23
_atom_site_aniso_U_13
_atom_site_aniso_U_12
Fe1 0.01506(11) 0.01639(11) 0.01877(11) -0.00198(7) -0.00226(7) -0.00001(8) 
Cl1 0.0247(2) 0.0278(2) 0.0358(2) -0.00840(16) -0.00533(16) 0.00767(16) 
N4 0.0172(6) 0.0187(6) 0.0189(6) -0.0041(5) -0.0013(5) -0.0031(5) 
N7 0.0160(6) 0.0178(5) 0.0181(6) -0.0031(4) -0.0017(4) -0.0022(5) 
N9 0.0182(6) 0.0197(6) 0.0170(6) -0.0027(4) -0.0009(4) -0.0045(5) 
N11 0.0245(6) 0.0200(6) 0.0169(6) -0.0012(5) -0.0046(5) -0.0060(5) 
N20 0.0175(6) 0.0179(6) 0.0197(6) -0.0025(5) -0.0022(5) -0.0032(5) 
N22 0.0172(6) 0.0209(6) 0.0294(7) 0.0005(5) -0.0035(5) -0.0051(5) 
C1 0.0186(7) 0.0181(6) 0.0187(6) -0.0032(5) -0.0007(5) -0.0040(5) 
C2 0.0161(6) 0.0199(6) 0.0207(7) -0.0013(5) -0.0037(5) -0.0035(5) 
C3 0.0170(7) 0.0205(7) 0.0195(7) -0.0010(5) -0.0028(5) -0.0056(5) 
C4 0.0227(7) 0.0322(8) 0.0207(7) -0.0041(6) -0.0049(6) -0.0082(6) 
C5 0.0323(10) 0.0349(10) 0.0681(14) -0.0159(10) -0.0185(10) -0.0094(8) 
C6 0.0262(8) 0.0327(8) 0.0272(8) 0.0038(7) -0.0111(6) -0.0083(7) 
C7 0.0217(7) 0.0245(7) 0.0223(7) -0.0098(6) -0.0002(6) -0.0041(6) 
C8 0.0341(9) 0.0233(8) 0.0442(10) -0.0108(7) 0.0015(8) -0.0050(7) 
C9 0.0258(8) 0.0378(9) 0.0289(8) -0.0113(7) 0.0054(7) -0.0094(7) 
C10 0.0192(7) 0.0188(6) 0.0183(6) -0.0013(5) -0.0035(5) -0.0048(5) 
C11 0.0238(7) 0.0236(7) 0.0184(7) -0.0064(6) 0.0005(6) -0.0075(6) 
C12 0.0296(8) 0.0252(7) 0.0175(7) -0.0049(6) -0.0007(6) -0.0106(6) 
C13 0.0502(12) 0.0366(9) 0.0168(7) -0.0026(7) 0.0000(7) -0.0115(9) 
C14 0.0633(15) 0.0638(15) 0.0266(10) -0.0144(10) -0.0154(10) -0.0113(12) 
C15 0.0566(14) 0.0708(16) 0.0248(9) -0.0105(10) 0.0124(9) -0.0200(13) 
C16 0.0351(9) 0.0221(7) 0.0197(7) 0.0025(6) -0.0083(6) -0.0040(7) 
C17 0.0529(12) 0.0207(8) 0.0409(10) -0.0016(7) -0.0068(9) -0.0088(8) 
C18 0.0305(9) 0.0410(10) 0.0359(10) 0.0024(8) -0.0149(8) -0.0042(8) 
C19 0.0164(7) 0.0207(7) 0.0243(7) -0.0004(6) -0.0022(5) -0.0037(6) 
C20 0.0230(7) 0.0183(7) 0.0231(7) -0.0031(5) -0.0053(6) -0.0044(6) 
C21 0.0242(7) 0.0209(7) 0.0261(7) -0.0010(6) -0.0068(6) -0.0071(6) 
C22 0.0318(9) 0.0283(8) 0.0443(10) -0.0009(7) -0.0137(8) -0.0143(7) 
C23 0.0477(12) 0.0370(10) 0.0572(13) 0.0090(9) -0.0101(10) -0.0255(10) 
C24 0.0583(15) 0.0410(12) 0.0790(18) -0.0268(12) 0.0003(13) -0.0270(11) 
C25 0.0169(8) 0.0271(8) 0.0661(13) -0.0002(8) -0.0003(8) -0.0079(7) 
C26 0.0392(12) 0.0558(14) 0.0695(16) -0.0156(12) 0.0288(11) -0.0187(11) 
C27 0.0276(10) 0.0431(12) 0.100(2) 0.0071(13) -0.0280(12) -0.0065(9) 
C28 0.0170(7) 0.0215(7) 0.0188(7) -0.0059(5) -0.0022(5) -0.0019(5) 
C29 0.0218(7) 0.0233(7) 0.0224(7) -0.0041(6) -0.0054(6) -0.0023(6) 
C30 0.0272(8) 0.0249(8) 0.0326(9) -0.0076(7) -0.0117(7) 0.0021(7) 
C31 0.0172(7) 0.0385(10) 0.0434(10) -0.0174(8) -0.0069(7) 0.0027(7) 
C32 0.0185(8) 0.0440(10) 0.0385(10) -0.0108(8) 0.0000(7) -0.0090(7) 
C33 0.0199(7) 0.0287(8) 0.0297(8) -0.0044(6) -0.0027(6) -0.0062(6) 
B1 0.0169(7) 0.0176(7) 0.0177(7) -0.0028(6) -0.0021(6) -0.0030(6) 

_refine_ls_extinction_method 
    'None'
_oxford_refine_ls_scale 0.18358(8) 
loop_
 _geom_bond_atom_site_label_1
 _geom_bond_site_symmetry_1
 _geom_bond_atom_site_label_2
 _geom_bond_site_symmetry_2
 _geom_bond_distance
 _geom_bond_publ_flag
Fe1 . Cl1 . 2.2673(4)    yes
Fe1 . C1 . 2.0721(15)    yes
Fe1 . C10 . 2.1002(15)    yes
Fe1 . C19 . 2.1068(16)    yes
N4 . C1 . 1.3580(19)    yes
N4 . C3 . 1.3972(19)    yes
N4 . C7 . 1.4821(19)    yes
N7 . C1 . 1.3602(18)    yes
N7 . C2 . 1.3900(19)    yes
N7 . B1 . 1.578(2)    yes
N9 . C10 . 1.3597(19)    yes
N9 . C11 . 1.3878(19)    yes
N9 . B1 . 1.571(2)    yes
N11 . C10 . 1.3644(19)    yes
N11 . C12 . 1.396(2)    yes
N11 . C16 . 1.475(2)    yes
N20 . C19 . 1.3617(19)    yes
N20 . C20 . 1.3876(19)    yes
N20 . B1 . 1.582(2)    yes
N22 . C19 . 1.357(2)    yes
N22 . C21 . 1.396(2)    yes
N22 . C25 . 1.478(2)    yes
C2 . C3 . 1.355(2)    yes
C2 . H21 . 0.950    no
C3 . C4 . 1.500(2)    yes
C4 . C5 . 1.528(3)    yes
C4 . C6 . 1.526(2)    yes
C4 . H41 . 0.950    no
C5 . H51 . 0.950    no
C5 . H52 . 0.950    no
C5 . H53 . 0.950    no
C6 . H61 . 0.950    no
C6 . H62 . 0.950    no
C6 . H63 . 0.950    no
C7 . C8 . 1.522(2)    yes
C7 . C9 . 1.517(2)    yes
C7 . H71 . 0.950    no
C8 . H81 . 0.950    no
C8 . H82 . 0.950    no
C8 . H83 . 0.950    no
C9 . H91 . 0.950    no
C9 . H92 . 0.950    no
C9 . H93 . 0.950    no
C11 . C12 . 1.354(2)    yes
C11 . H111 . 0.950    no
C12 . C13 . 1.504(2)    yes
C13 . C14 . 1.524(3)    yes
C13 . C15 . 1.526(3)    yes
C13 . H131 . 0.950    no
C14 . H141 . 0.950    no
C14 . H142 . 0.950    no
C14 . H143 . 0.950    no
C15 . H151 . 0.950    no
C15 . H152 . 0.950    no
C15 . H153 . 0.950    no
C16 . C17 . 1.518(3)    yes
C16 . C18 . 1.517(3)    yes
C16 . H161 . 0.950    no
C17 . H171 . 0.950    no
C17 . H172 . 0.950    no
C17 . H173 . 0.950    no
C18 . H181 . 0.950    no
C18 . H182 . 0.950    no
C18 . H183 . 0.950    no
C20 . C21 . 1.357(2)    yes
C20 . H201 . 0.950    no
C21 . C22 . 1.499(2)    yes
C22 . C23 . 1.531(3)    yes
C22 . C24 . 1.524(3)    yes
C22 . H221 . 0.950    no
C23 . H231 . 0.950    no
C23 . H232 . 0.950    no
C23 . H233 . 0.950    no
C24 . H241 . 0.950    no
C24 . H242 . 0.950    no
C24 . H243 . 0.950    no
C25 . C26 . 1.517(3)    yes
C25 . C27 . 1.518(3)    yes
C25 . H251 . 0.950    no
C26 . H261 . 0.950    no
C26 . H262 . 0.950    no
C26 . H263 . 0.950    no
C27 . H271 . 0.950    no
C27 . H272 . 0.950    no
C27 . H273 . 0.950    no
C28 . C29 . 1.402(2)    yes
C28 . C33 . 1.406(2)    yes
C28 . B1 . 1.617(2)    yes
C29 . C30 . 1.396(2)    yes
C29 . H291 . 0.950    no
C30 . C31 . 1.380(3)    yes
C30 . H301 . 0.950    no
C31 . C32 . 1.383(3)    yes
C31 . H311 . 0.950    no
C32 . C33 . 1.394(2)    yes
C32 . H321 . 0.950    no
C33 . H331 . 0.950    no
C34 . C35 . 1.306(8)    yes
C34 . C36 . 1.320(6)    yes
C34 . C37 . 1.322(7)    yes
C35 . C36 2_665 1.456(9)    yes
C35 . H351 . 0.950    no
C36 . H361 . 0.950    no
C37 . H371 . 0.950    no
C37 . H372 . 0.950    no
C37 . H373 . 0.950    no
C38 . C39 . 1.327(4)    yes
C38 . C43 . 1.419(4)    yes
C38 . C44 . 1.464(5)    yes
C39 . C40 . 1.412(4)    yes
C39 . H391 . 0.950    no
C40 . C41 . 1.346(5)    yes
C40 . H401 . 0.950    no
C41 . C42 . 1.300(5)    yes
C41 . H411 . 0.950    no
C42 . C43 . 1.389(5)    yes
C42 . H421 . 0.950    no
C43 . H431 . 0.950    no
C44 . H441 . 0.950    no
C44 . H442 . 0.950    no
C44 . H443 . 0.950    no
C381 . C391 . 1.346(5)    yes
C381 . C431 . 1.389(4)    yes
C381 . C441 . 1.485(6)    yes
C391 . C401 . 1.390(5)    yes
C391 . H3911 . 0.950    no
C401 . C411 . 1.317(5)    yes
C401 . H4011 . 0.950    no
C411 . C421 . 1.316(5)    yes
C411 . H4111 . 0.950    no
C421 . C431 . 1.366(5)    yes
C421 . H4211 . 0.950    no
C431 . H4311 . 0.950    no
C441 . H4411 . 0.950    no
C441 . H4412 . 0.950    no
C441 . H4413 . 0.950    no
loop_
 _geom_angle_atom_site_label_1
 _geom_angle_site_symmetry_1
 _geom_angle_atom_site_label_2
 _geom_angle_site_symmetry_2
 _geom_angle_atom_site_label_3
 _geom_angle_site_symmetry_3
 _geom_angle
 _geom_angle_publ_flag
Cl1 . Fe1 . C1 . 123.34(4)    yes
Cl1 . Fe1 . C10 . 122.76(4)    yes
C1 . Fe1 . C10 . 94.52(6)    yes
Cl1 . Fe1 . C19 . 128.41(4)    yes
C1 . Fe1 . C19 . 89.08(6)    yes
C10 . Fe1 . C19 . 88.35(6)    yes
C1 . N4 . C3 . 110.84(12)    yes
C1 . N4 . C7 . 123.89(13)    yes
C3 . N4 . C7 . 125.05(12)    yes
C1 . N7 . C2 . 109.35(12)    yes
C1 . N7 . B1 . 124.73(12)    yes
C2 . N7 . B1 . 125.40(12)    yes
C10 . N9 . C11 . 109.88(12)    yes
C10 . N9 . B1 . 122.60(12)    yes
C11 . N9 . B1 . 126.60(12)    yes
C10 . N11 . C12 . 111.11(13)    yes
C10 . N11 . C16 . 123.78(13)    yes
C12 . N11 . C16 . 125.11(13)    yes
C19 . N20 . C20 . 109.24(13)    yes
C19 . N20 . B1 . 120.40(12)    yes
C20 . N20 . B1 . 130.02(12)    yes
C19 . N22 . C21 . 111.16(13)    yes
C19 . N22 . C25 . 123.28(14)    yes
C21 . N22 . C25 . 125.55(14)    yes
Fe1 . C1 . N7 . 112.46(10)    yes
Fe1 . C1 . N4 . 141.53(11)    yes
N7 . C1 . N4 . 105.84(12)    yes
N7 . C2 . C3 . 108.42(13)    yes
N7 . C2 . H21 . 125.8    no
C3 . C2 . H21 . 125.8    no
N4 . C3 . C2 . 105.55(12)    yes
N4 . C3 . C4 . 124.77(13)    yes
C2 . C3 . C4 . 129.68(14)    yes
C3 . C4 . C5 . 112.07(15)    yes
C3 . C4 . C6 . 110.83(13)    yes
C5 . C4 . C6 . 110.55(14)    yes
C3 . C4 . H41 . 107.5    no
C5 . C4 . H41 . 108.1    no
C6 . C4 . H41 . 107.5    no
C4 . C5 . H51 . 109.7    no
C4 . C5 . H52 . 109.8    no
H51 . C5 . H52 . 109.5    no
C4 . C5 . H53 . 108.9    no
H51 . C5 . H53 . 109.5    no
H52 . C5 . H53 . 109.5    no
C4 . C6 . H61 . 109.6    no
C4 . C6 . H62 . 109.2    no
H61 . C6 . H62 . 109.5    no
C4 . C6 . H63 . 109.6    no
H61 . C6 . H63 . 109.5    no
H62 . C6 . H63 . 109.5    no
N4 . C7 . C8 . 111.04(14)    yes
N4 . C7 . C9 . 110.87(13)    yes
C8 . C7 . C9 . 112.16(15)    yes
N4 . C7 . H71 . 107.7    no
C8 . C7 . H71 . 106.9    no
C9 . C7 . H71 . 107.9    no
C7 . C8 . H81 . 110.1    no
C7 . C8 . H82 . 110.0    no
H81 . C8 . H82 . 109.5    no
C7 . C8 . H83 . 108.3    no
H81 . C8 . H83 . 109.5    no
H82 . C8 . H83 . 109.5    no
C7 . C9 . H91 . 109.8    no
C7 . C9 . H92 . 109.3    no
H91 . C9 . H92 . 109.5    no
C7 . C9 . H93 . 109.3    no
H91 . C9 . H93 . 109.5    no
H92 . C9 . H93 . 109.5    no
Fe1 . C10 . N11 . 139.69(11)    yes
Fe1 . C10 . N9 . 113.91(10)    yes
N11 . C10 . N9 . 105.17(12)    yes
N9 . C11 . C12 . 108.34(13)    yes
N9 . C11 . H111 . 125.6    no
C12 . C11 . H111 . 126.1    no
N11 . C12 . C11 . 105.48(13)    yes
N11 . C12 . C13 . 124.46(15)    yes
C11 . C12 . C13 . 130.04(15)    yes
C12 . C13 . C14 . 111.80(18)    yes
C12 . C13 . C15 . 110.76(17)    yes
C14 . C13 . C15 . 109.71(18)    yes
C12 . C13 . H131 . 108.7    no
C14 . C13 . H131 . 108.1    no
C15 . C13 . H131 . 107.7    no
C13 . C14 . H141 . 110.0    no
C13 . C14 . H142 . 109.3    no
H141 . C14 . H142 . 109.5    no
C13 . C14 . H143 . 109.2    no
H141 . C14 . H143 . 109.5    no
H142 . C14 . H143 . 109.5    no
C13 . C15 . H151 . 109.6    no
C13 . C15 . H152 . 110.0    no
H151 . C15 . H152 . 109.5    no
C13 . C15 . H153 . 108.8    no
H151 . C15 . H153 . 109.5    no
H152 . C15 . H153 . 109.5    no
N11 . C16 . C17 . 110.56(14)    yes
N11 . C16 . C18 . 111.01(14)    yes
C17 . C16 . C18 . 112.28(16)    yes
N11 . C16 . H161 . 107.7    no
C17 . C16 . H161 . 107.6    no
C18 . C16 . H161 . 107.4    no
C16 . C17 . H171 . 109.5    no
C16 . C17 . H172 . 109.4    no
H171 . C17 . H172 . 109.5    no
C16 . C17 . H173 . 109.5    no
H171 . C17 . H173 . 109.5    no
H172 . C17 . H173 . 109.5    no
C16 . C18 . H181 . 109.2    no
C16 . C18 . H182 . 109.4    no
H181 . C18 . H182 . 109.5    no
C16 . C18 . H183 . 109.8    no
H181 . C18 . H183 . 109.5    no
H182 . C18 . H183 . 109.5    no
Fe1 . C19 . N20 . 115.44(11)    yes
Fe1 . C19 . N22 . 138.32(11)    yes
N20 . C19 . N22 . 105.71(13)    yes
N20 . C20 . C21 . 108.67(13)    yes
N20 . C20 . H201 . 125.7    no
C21 . C20 . H201 . 125.6    no
N22 . C21 . C20 . 105.18(13)    yes
N22 . C21 . C22 . 124.12(15)    yes
C20 . C21 . C22 . 130.70(15)    yes
C21 . C22 . C23 . 112.71(16)    yes
C21 . C22 . C24 . 110.29(16)    yes
C23 . C22 . C24 . 109.42(19)    yes
C21 . C22 . H221 . 108.3    no
C23 . C22 . H221 . 108.2    no
C24 . C22 . H221 . 107.8    no
C22 . C23 . H231 . 110.2    no
C22 . C23 . H232 . 109.2    no
H231 . C23 . H232 . 109.5    no
C22 . C23 . H233 . 109.0    no
H231 . C23 . H233 . 109.5    no
H232 . C23 . H233 . 109.5    no
C22 . C24 . H241 . 109.8    no
C22 . C24 . H242 . 108.8    no
H241 . C24 . H242 . 109.5    no
C22 . C24 . H243 . 109.8    no
H241 . C24 . H243 . 109.5    no
H242 . C24 . H243 . 109.5    no
N22 . C25 . C26 . 109.90(17)    yes
N22 . C25 . C27 . 110.96(18)    yes
C26 . C25 . C27 . 113.1(2)    yes
N22 . C25 . H251 . 107.8    no
C26 . C25 . H251 . 107.9    no
C27 . C25 . H251 . 106.9    no
C25 . C26 . H261 . 109.2    no
C25 . C26 . H262 . 109.7    no
H261 . C26 . H262 . 109.5    no
C25 . C26 . H263 . 109.5    no
H261 . C26 . H263 . 109.5    no
H262 . C26 . H263 . 109.5    no
C25 . C27 . H271 . 110.1    no
C25 . C27 . H272 . 108.6    no
H271 . C27 . H272 . 109.5    no
C25 . C27 . H273 . 109.6    no
H271 . C27 . H273 . 109.5    no
H272 . C27 . H273 . 109.5    no
C29 . C28 . C33 . 115.70(14)    yes
C29 . C28 . B1 . 124.15(14)    yes
C33 . C28 . B1 . 119.09(14)    yes
C28 . C29 . C30 . 122.42(16)    yes
C28 . C29 . H291 . 118.8    no
C30 . C29 . H291 . 118.8    no
C29 . C30 . C31 . 120.03(17)    yes
C29 . C30 . H301 . 120.0    no
C31 . C30 . H301 . 120.0    no
C30 . C31 . C32 . 119.43(16)    yes
C30 . C31 . H311 . 120.2    no
C32 . C31 . H311 . 120.3    no
C31 . C32 . C33 . 120.18(18)    yes
C31 . C32 . H321 . 120.1    no
C33 . C32 . H321 . 119.7    no
C28 . C33 . C32 . 122.21(17)    yes
C28 . C33 . H331 . 118.6    no
C32 . C33 . H331 . 119.2    no
C35 . C34 . C36 . 117.2(6)    yes
C35 . C34 . C37 . 127.8(7)    yes
C36 . C34 . C37 . 115.0(7)    yes
C36 2_665 C35 . C34 . 123.8(7)    yes
C36 2_665 C35 . H351 . 119.5    no
C34 . C35 . H351 . 115.8    no
C35 2_665 C36 . C34 . 119.0(7)    yes
C35 2_665 C36 . H361 . 120.6    no
C34 . C36 . H361 . 118.6    no
C34 . C37 . H371 . 109.2    no
C34 . C37 . H372 . 112.2    no
H371 . C37 . H372 . 109.5    no
C34 . C37 . H373 . 106.9    no
H371 . C37 . H373 . 109.5    no
H372 . C37 . H373 . 109.5    no
C39 . C38 . C43 . 118.36(6)    yes
C39 . C38 . C44 . 120.69(6)    yes
C43 . C38 . C44 . 120.84(6)    yes
C38 . C39 . C40 . 119.92(6)    yes
C38 . C39 . H391 . 119.5    no
C40 . C39 . H391 . 120.5    no
C39 . C40 . C41 . 119.97(6)    yes
C39 . C40 . H401 . 119.3    no
C41 . C40 . H401 . 120.6    no
C40 . C41 . C42 . 121.86(6)    yes
C40 . C41 . H411 . 119.0    no
C42 . C41 . H411 . 118.8    no
C41 . C42 . C43 . 119.94(6)    yes
C41 . C42 . H421 . 121.0    no
C43 . C42 . H421 . 118.9    no
C38 . C43 . C42 . 119.86(6)    yes
C38 . C43 . H431 . 119.0    no
C42 . C43 . H431 . 121.1    no
C38 . C44 . H441 . 109.8    no
C38 . C44 . H442 . 110.6    no
H441 . C44 . H442 . 109.5    no
C38 . C44 . H443 . 107.9    no
H441 . C44 . H443 . 109.5    no
H442 . C44 . H443 . 109.5    no
C391 . C381 . C431 . 118.26(6)    yes
C391 . C381 . C441 . 120.66(6)    yes
C431 . C381 . C441 . 120.72(6)    yes
C381 . C391 . C401 . 119.81(6)    yes
C381 . C391 . H3911 . 118.0    no
C401 . C391 . H3911 . 122.1    no
C391 . C401 . C411 . 119.95(6)    yes
C391 . C401 . H4011 . 117.9    no
C411 . C401 . H4011 . 122.1    no
C401 . C411 . C421 . 121.89(6)    yes
C401 . C411 . H4111 . 117.7    no
C421 . C411 . H4111 . 120.2    no
C411 . C421 . C431 . 120.02(6)    yes
C411 . C421 . H4211 . 119.7    no
C431 . C421 . H4211 . 120.3    no
C381 . C431 . C421 . 119.90(6)    yes
C381 . C431 . H4311 . 120.4    no
C421 . C431 . H4311 . 119.7    no
C381 . C441 . H4411 . 108.2    no
C381 . C441 . H4412 . 109.6    no
H4411 . C441 . H4412 . 109.5    no
C381 . C441 . H4413 . 110.6    no
H4411 . C441 . H4413 . 109.5    no
H4412 . C441 . H4413 . 109.5    no
C28 . B1 . N20 . 117.02(12)    yes
C28 . B1 . N7 . 106.21(11)    yes
N20 . B1 . N7 . 107.25(12)    yes
C28 . B1 . N9 . 112.52(12)    yes
N20 . B1 . N9 . 103.90(11)    yes
N7 . B1 . N9 . 109.76(12)    yes

loop_
_geom_torsion_atom_site_label_1
_geom_torsion_atom_site_label_2
_geom_torsion_atom_site_label_3
_geom_torsion_atom_site_label_4
_geom_torsion
_geom_torsion_site_symmetry_1
_geom_torsion_site_symmetry_2
_geom_torsion_site_symmetry_3
_geom_torsion_site_symmetry_4
_geom_torsion_publ_flag
 Cl1     Fe1     C1      N4          11.8(2)     .       .       .       .   no
 Cl1     Fe1     C1      N7       -173.93(9)     .       .       .       .   no
 C10     Fe1     C1      N4       146.35(19)     .       .       .       .   no
 C10     Fe1     C1      N7       -39.37(12)     .       .       .       .   no
 C19     Fe1     C1      N4      -125.37(19)     .       .       .       .   no
 C19     Fe1     C1      N7        48.91(12)     .       .       .       .   no
 Cl1     Fe1     C10     N9       178.07(10)     .       .       .       .   no
 Cl1     Fe1     C10     N11        -17.2(2)     .       .       .       .   no
 C1      Fe1     C10     N9        43.13(13)     .       .       .       .   no
 C1      Fe1     C10     N11     -152.11(18)     .       .       .       .   no
 C19     Fe1     C10     N9       -45.82(12)     .       .       .       .   no
 C19     Fe1     C10     N11      118.94(19)     .       .       .       .   no
 Cl1     Fe1     C19     N20       177.33(8)     .       .       .       .   no
 Cl1     Fe1     C19     N22          7.1(2)     .       .       .       .   no
 C1      Fe1     C19     N20      -49.14(12)     .       .       .       .   no
 C1      Fe1     C19     N22      140.66(18)     .       .       .       .   no
 C10     Fe1     C19     N20       45.41(12)     .       .       .       .   no
 C10     Fe1     C19     N22     -124.80(18)     .       .       .       .   no
 C3      N4      C1      Fe1      174.98(15)     .       .       .       .   no
 C3      N4      C1      N7         0.47(17)     .       .       .       .   no
 C7      N4      C1      Fe1          0.1(3)     .       .       .       .   no
 C7      N4      C1      N7      -174.36(13)     .       .       .       .   no
 C1      N4      C3      C2        -0.29(18)     .       .       .       .   no
 C1      N4      C3      C4       179.06(15)     .       .       .       .   no
 C7      N4      C3      C2       174.47(14)     .       .       .       .   no
 C7      N4      C3      C4          -6.2(2)     .       .       .       .   no
 C1      N4      C7      C8         -67.6(2)     .       .       .       .   no
 C1      N4      C7      C9        57.83(19)     .       .       .       .   no
 C3      N4      C7      C8       118.32(17)     .       .       .       .   no
 C3      N4      C7      C9      -116.28(17)     .       .       .       .   no
 C2      N7      C1      Fe1     -176.77(10)     .       .       .       .   no
 C2      N7      C1      N4        -0.47(17)     .       .       .       .   no
 B1      N7      C1      Fe1       -4.74(19)     .       .       .       .   no
 B1      N7      C1      N4       171.57(13)     .       .       .       .   no
 C1      N7      C2      C3         0.30(18)     .       .       .       .   no
 B1      N7      C2      C3      -171.67(14)     .       .       .       .   no
 C1      N7      B1      N9          57.7(2)     .       .       .       .   no
 C1      N7      B1      N20      -54.60(18)     .       .       .       .   no
 C1      N7      B1      C28      179.55(14)     .       .       .       .   no
 C2      N7      B1      N9      -131.57(15)     .       .       .       .   no
 C2      N7      B1      N20      116.17(16)     .       .       .       .   no
 C2      N7      B1      C28         -9.7(2)     .       .       .       .   no
 C11     N9      C10     Fe1      168.20(11)     .       .       .       .   no
 C11     N9      C10     N11       -1.65(19)     .       .       .       .   no
 B1      N9      C10     Fe1         -1.5(2)     .       .       .       .   no
 B1      N9      C10     N11     -171.35(14)     .       .       .       .   no
 C10     N9      C11     C12          1.7(2)     .       .       .       .   no
 B1      N9      C11     C12      170.89(16)     .       .       .       .   no
 C10     N9      B1      N7         -52.5(2)     .       .       .       .   no
 C10     N9      B1      N20       61.95(18)     .       .       .       .   no
 C10     N9      B1      C28     -170.52(14)     .       .       .       .   no
 C11     N9      B1      N7       139.60(16)     .       .       .       .   no
 C11     N9      B1      N20     -105.97(18)     .       .       .       .   no
 C11     N9      B1      C28         21.6(2)     .       .       .       .   no
 C12     N11     C10     Fe1     -164.54(15)     .       .       .       .   no
 C12     N11     C10     N9         1.04(19)     .       .       .       .   no
 C16     N11     C10     Fe1         16.2(3)     .       .       .       .   no
 C16     N11     C10     N9      -178.19(16)     .       .       .       .   no
 C10     N11     C12     C11          0.0(2)     .       .       .       .   no
 C10     N11     C12     C13      178.53(18)     .       .       .       .   no
 C16     N11     C12     C11      179.19(17)     .       .       .       .   no
 C16     N11     C12     C13         -2.3(3)     .       .       .       .   no
 C10     N11     C16     C17         59.5(2)     .       .       .       .   no
 C10     N11     C16     C18        -65.8(2)     .       .       .       .   no
 C12     N11     C16     C17     -119.63(19)     .       .       .       .   no
 C12     N11     C16     C18      115.09(19)     .       .       .       .   no
 C20     N20     C19     Fe1     -171.18(10)     .       .       .       .   no
 C20     N20     C19     N22        2.07(17)     .       .       .       .   no
 B1      N20     C19     Fe1        2.86(17)     .       .       .       .   no
 B1      N20     C19     N22      176.11(13)     .       .       .       .   no
 C19     N20     C20     C21       -1.88(18)     .       .       .       .   no
 B1      N20     C20     C21     -175.16(14)     .       .       .       .   no
 C19     N20     B1      N7        54.13(17)     .       .       .       .   no
 C19     N20     B1      N9       -62.07(16)     .       .       .       .   no
 C19     N20     B1      C28      173.25(13)     .       .       .       .   no
 C20     N20     B1      N7      -133.22(15)     .       .       .       .   no
 C20     N20     B1      N9       110.58(16)     .       .       .       .   no
 C20     N20     B1      C28        -14.1(2)     .       .       .       .   no
 C21     N22     C19     Fe1      169.27(14)     .       .       .       .   no
 C21     N22     C19     N20       -1.55(18)     .       .       .       .   no
 C25     N22     C19     Fe1         -9.1(3)     .       .       .       .   no
 C25     N22     C19     N20     -179.96(15)     .       .       .       .   no
 C19     N22     C21     C20        0.42(18)     .       .       .       .   no
 C19     N22     C21     C22      179.88(16)     .       .       .       .   no
 C25     N22     C21     C20      178.78(17)     .       .       .       .   no
 C25     N22     C21     C22         -1.8(3)     .       .       .       .   no
 C19     N22     C25     C26        -56.8(2)     .       .       .       .   no
 C19     N22     C25     C27         69.0(2)     .       .       .       .   no
 C21     N22     C25     C26      125.00(18)     .       .       .       .   no
 C21     N22     C25     C27       -109.1(2)     .       .       .       .   no
 N7      C2      C3      N4         0.00(17)     .       .       .       .   no
 N7      C2      C3      C4      -179.32(16)     .       .       .       .   no
 N4      C3      C4      C5         -67.5(2)     .       .       .       .   no
 N4      C3      C4      C6       168.52(15)     .       .       .       .   no
 C2      C3      C4      C5         111.7(2)     .       .       .       .   no
 C2      C3      C4      C6         -12.3(3)     .       .       .       .   no
 N9      C11     C12     N11         -1.0(2)     .       .       .       .   no
 N9      C11     C12     C13     -179.44(19)     .       .       .       .   no
 N11     C12     C13     C14        -74.1(2)     .       .       .       .   no
 N11     C12     C13     C15        163.2(2)     .       .       .       .   no
 C11     C12     C13     C14        104.1(3)     .       .       .       .   no
 C11     C12     C13     C15        -18.6(3)     .       .       .       .   no
 N20     C20     C21     N22        0.88(18)     .       .       .       .   no
 N20     C20     C21     C22     -178.53(17)     .       .       .       .   no
 N22     C21     C22     C23        -71.1(2)     .       .       .       .   no
 N22     C21     C22     C24      166.31(19)     .       .       .       .   no
 C20     C21     C22     C23        108.2(2)     .       .       .       .   no
 C20     C21     C22     C24        -14.4(3)     .       .       .       .   no
 C33     C28     C29     C30         -1.2(2)     .       .       .       .   no
 B1      C28     C29     C30     -169.29(16)     .       .       .       .   no
 C29     C28     C33     C32          2.1(3)     .       .       .       .   no
 B1      C28     C33     C32      170.83(17)     .       .       .       .   no
 C29     C28     B1      N7        90.08(18)     .       .       .       .   no
 C29     C28     B1      N9      -149.81(15)     .       .       .       .   no
 C29     C28     B1      N20        -29.6(2)     .       .       .       .   no
 C33     C28     B1      N7       -77.61(17)     .       .       .       .   no
 C33     C28     B1      N9          42.5(2)     .       .       .       .   no
 C33     C28     B1      N20      162.71(14)     .       .       .       .   no
 C28     C29     C30     C31         -0.4(3)     .       .       .       .   no
 C29     C30     C31     C32          1.2(3)     .       .       .       .   no
 C30     C31     C32     C33         -0.3(3)     .       .       .       .   no
 C31     C32     C33     C28         -1.4(3)     .       .       .       .   no
 C431    C381    C391    C401        -4.7(9)     .       .       .       .   no
 C441    C381    C391    C401      -177.8(7)     .       .       .       .   no
 C391    C381    C431    C421         2.0(9)     .       .       .       .   no
 C441    C381    C431    C421       175.1(7)     .       .       .       .   no
 C381    C391    C401    C411        4.1(11)     .       .       .       .   no
 C391    C401    C411    C421       -0.5(12)     .       .       .       .   no
 C401    C411    C421    C431       -2.3(12)     .       .       .       .   no
 C411    C421    C431    C381        1.5(10)     .       .       .       .   no

_iucr_refine_instruction_details_constraints
;
#
# Punched on 16/10/13 at 11:43:41
#
#LIST     12                                                                    
BLOCK 
CONT SCALE 
CONT FE   (    1 ,X'S,U'S)  UNTIL C    (   33 ) 
CONT C    (   34 ,X'S,U[ISO])  UNTIL C    (   38 ) 
CONT C    (   39 ,X'S,U[ISO]) 
CONT C    (   40 ,X'S,U[ISO])  UNTIL C    (   441 ) 
CONT B    (    1 ,X'S,U'S) 
SUMFIX PART(1001,OCC) AND PART(1002,OCC) 
RIDE C   (   2,X'S) H   (  21,X'S) 
RIDE C   (   4,X'S) H   (  41,X'S) 
RIDE C   (   5,X'S) H   (  51,X'S) H   (  52,X'S) H   (  53,X'S) 
RIDE C   (   6,X'S) H   (  61,X'S) H   (  62,X'S) H   (  63,X'S) 
RIDE C   (   7,X'S) H   (  71,X'S) 
RIDE C   (   8,X'S) H   (  81,X'S) H   (  82,X'S) H   (  83,X'S) 
RIDE C   (   9,X'S) H   (  91,X'S) H   (  92,X'S) H   (  93,X'S) 
RIDE C   (  11,X'S) H   ( 111,X'S) 
RIDE C   (  13,X'S) H   ( 131,X'S) 
RIDE C   (  14,X'S) H   ( 141,X'S) H   ( 142,X'S) H   ( 143,X'S) 
RIDE C   (  15,X'S) H   ( 151,X'S) H   ( 152,X'S) H   ( 153,X'S) 
RIDE C   (  16,X'S) H   ( 161,X'S) 
RIDE C   (  17,X'S) H   ( 171,X'S) H   ( 172,X'S) H   ( 173,X'S) 
RIDE C   (  18,X'S) H   ( 181,X'S) H   ( 182,X'S) H   ( 183,X'S) 
RIDE C   (  20,X'S) H   ( 201,X'S) 
RIDE C   (  22,X'S) H   ( 221,X'S) 
RIDE C   (  23,X'S) H   ( 231,X'S) H   ( 232,X'S) H   ( 233,X'S) 
RIDE C   (  24,X'S) H   ( 241,X'S) H   ( 242,X'S) H   ( 243,X'S) 
RIDE C   (  25,X'S) H   ( 251,X'S) 
RIDE C   (  26,X'S) H   ( 261,X'S) H   ( 262,X'S) H   ( 263,X'S) 
RIDE C   (  27,X'S) H   ( 271,X'S) H   ( 272,X'S) H   ( 273,X'S) 
RIDE C   (  29,X'S) H   ( 291,X'S) 
RIDE C   (  30,X'S) H   ( 301,X'S) 
RIDE C   (  31,X'S) H   ( 311,X'S) 
RIDE C   (  32,X'S) H   ( 321,X'S) 
RIDE C   (  33,X'S) H   ( 331,X'S) 
RIDE C   (  35,X'S) H   ( 351,X'S) 
RIDE C   (  36,X'S) H   ( 361,X'S) 
RIDE C   (  37,X'S) H   ( 371,X'S) H   ( 372,X'S) H   ( 373,X'S) 
RIDE C   (  39,X'S) H   ( 391,X'S) 
RIDE C   (  40,X'S) H   ( 401,X'S) 
RIDE C   (  41,X'S) H   ( 411,X'S) 
RIDE C   (  42,X'S) H   ( 421,X'S) 
RIDE C   (  43,X'S) H   ( 431,X'S) 
RIDE C   (  44,X'S) H   ( 441,X'S) H   ( 442,X'S) H   ( 443,X'S) 
RIDE C   ( 391,X'S) H   (3911,X'S) 
RIDE C   ( 401,X'S) H   (4011,X'S) 
RIDE C   ( 411,X'S) H   (4111,X'S) 
RIDE C   ( 421,X'S) H   (4211,X'S) 
RIDE C   ( 431,X'S) H   (4311,X'S) 
RIDE C   ( 441,X'S) H   (4411,X'S) H   (4412,X'S) H   (4413,X'S) 
END                                                                             
;


_iucr_refine_instruction_details_restraints
;
#
# Punched on 16/10/13 at 11:43:41
#
#LIST     16                                                                    
NO 
REM   HREST   START (DO NOT REMOVE THIS LINE) 
REM   HREST   END (DO NOT REMOVE THIS LINE) 
SAME 0.01, 0.1 FOR 
CONT C(38) C(39) C(40) C(41) C(42) C(43) C(44) AND 
CONT C(38) C(43) C(42) C(41) C(40) C(39) C(44) AND 
CONT C(381) C(391) C(401) C(411) C(421) C(431) C(441) AND 
CONT C(381) C(431) C(421) C(411) C(401) C(391) C(441) 
ANGLE 120.000000 , 1.000000 = C(35) TO C(34) TO C(36) 
DISTANCE 1.400000 , 0.010000 = C(34) TO C(36) 
END                                                                             
;


data_jsNMSUwtl67
_vrf_THETM01_jsNMSUwtl67
;
RESPONSE: The best available crystal exhibited very weak diffraction 
patterns, with a sharp cutoff at ca. d = 0.90 A.  Significant data
beyond that resolution was not attainable.  Nonetheless, the structure
itself is unequivocally determined.
;
_chemical_name_systematic               ?
_chemical_name_common                   WTL-67
_chemical_formula_moiety                ?
_chemical_formula_sum                   'C33 H50 B Fe N7'
_chemical_formula_iupac                 ?
_chemical_formula_weight                611.46

_chemical_melting_point                 ?

_space_group_crystal_system             trigonal
_space_group_name_H-M_alt               'P -3'
_space_group_name_Hall                  '-P 3'
loop_
    _space_group_symop_operation_xyz
    'x, y, z'
    '-y, x-y, z'
    '-x+y, -x, z'
    '-x, -y, -z'
    'y, -x+y, -z'
    'x-y, x, -z'

_cell_length_a                          10.302(2)
_cell_length_b                          10.302(2)
_cell_length_c                          19.677(4)
_cell_angle_alpha                       90
_cell_angle_beta                        90
_cell_angle_gamma                       120
_cell_volume                            1808.6(8)
_cell_formula_units_Z                   2
_cell_measurement_reflns_used           1165
_cell_measurement_theta_min             2.2827
_cell_measurement_theta_max             18.3406
_cell_measurement_temperature           100.(2)

_exptl_crystal_description              plate
_exptl_crystal_colour                   orange
_exptl_crystal_size_max                 0.340
_exptl_crystal_size_mid                 0.152
_exptl_crystal_size_min                 0.125
_exptl_crystal_density_diffrn           1.123
_exptl_crystal_density_meas             ?
_exptl_crystal_density_method           'not measured'
_exptl_crystal_F_000                    656

_exptl_absorpt_coefficient_mu           0.447
_exptl_absorpt_correction_type          Multi-Scan
_exptl_absorpt_process_details          
;
SADABS V2016/2 - Bruker AXS area detector scaling and absorption correction
;
_exptl_absorpt_correction_T_min         0.67
_exptl_absorpt_correction_T_max         0.95

_exptl_special_details                  
;
; 

_diffrn_ambient_temperature             100.(2)

_diffrn_source                          'fine-focus tube'
_diffrn_source_type                     ?

_diffrn_radiation_type                  'Mo K\a'
_diffrn_radiation_wavelength            0.71073
_diffrn_radiation_monochromator         graphite

_diffrn_measurement_device_type         'Bruker Kappa APEXII CCD'
_diffrn_measurement_method              '\f and\w scans'

_diffrn_detector_area_resol_mean        8.3333

_diffrn_reflns_number                   9090
_diffrn_reflns_av_R_equivalents         0.1699
_diffrn_reflns_av_unetI/netI            0.1448
_diffrn_reflns_theta_min                2.07
_diffrn_reflns_theta_max                23.25
_diffrn_reflns_theta_full               23.25
_diffrn_measured_fraction_theta_max     0.999
_diffrn_measured_fraction_theta_full    0.999
_diffrn_reflns_limit_h_min              -9
_diffrn_reflns_limit_h_max              11
_diffrn_reflns_limit_k_min              -10
_diffrn_reflns_limit_k_max              11
_diffrn_reflns_limit_l_min              -21
_diffrn_reflns_limit_l_max              21

_refine_special_details                 
;
;

_reflns_number_total                    1758
_reflns_number_gt                       928
_reflns_threshold_expression            'I > 2\s(I)'

_refine_ls_structure_factor_coef        Fsqd
_refine_ls_matrix_type                  full
_refine_ls_R_factor_all                 0.1633
_refine_ls_R_factor_gt                  0.0848
_refine_ls_wR_factor_gt                 0.1987
_refine_ls_wR_factor_ref                0.2492
_refine_ls_goodness_of_fit_ref          0.996
_refine_ls_restrained_S_all             0.996
_refine_ls_number_reflns                1758
_refine_ls_number_parameters            146
_refine_ls_number_restraints            3
_refine_ls_number_constraints           ?
_refine_ls_hydrogen_treatment           mixed
_refine_ls_weighting_scheme             calc
_refine_ls_weighting_details            
    'w=1/[\s^2^(Fo^2^)+(0.1387P)^2^] where P=(Fo^2^+2Fc^2^)/3'

_atom_sites_solution_hydrogens          mixed
_atom_sites_solution_primary            dual
_atom_sites_solution_secondary          ?

_refine_ls_shift/su_max                 0.000
_refine_ls_shift/su_mean                0.000
_refine_diff_density_max                1.506
_refine_diff_density_min                -0.514
_refine_ls_extinction_method            none
_refine_ls_extinction_coef              ?

loop_
    _atom_type_symbol
    _atom_type_description
    _atom_type_scat_dispersion_real
    _atom_type_scat_dispersion_imag
    _atom_type_scat_source
    C C 0.0033 0.0016 'International Tables Vol C Tables 4.2.6.8 and 6.1.1.4'
    H H 0.0000 0.0000 'International Tables Vol C Tables 4.2.6.8 and 6.1.1.4'
    B B 0.0013 0.0007 'International Tables Vol C Tables 4.2.6.8 and 6.1.1.4'
    Fe Fe 0.3463 0.8444
     'International Tables Vol C Tables 4.2.6.8 and 6.1.1.4'
    N N 0.0061 0.0033 'International Tables Vol C Tables 4.2.6.8 and 6.1.1.4'

_computing_data_collection              
    'Bruker Instrument Service v2012.12.0.0'
_computing_cell_refinement              'SAINT V8.38A (Bruker AXS Inc., 2017)'
_computing_data_reduction               'SAINT V8.38A (Bruker AXS Inc., 2017)'
_computing_structure_solution           
    'SHELXT, VERSION 2014/5 (Sheldrick, 2014)'
_computing_structure_refinement         'SHELXL-2016/6 (Sheldrick, 2016)'
_computing_molecular_graphics           ?
_computing_publication_material         ?

loop_
    _atom_site_type_symbol
    _atom_site_label
    _atom_site_fract_x
    _atom_site_fract_y
    _atom_site_fract_z
    _atom_site_U_iso_or_equiv
    _atom_site_adp_type
    _atom_site_calc_flag
    _atom_site_refinement_flags_adp
    _atom_site_refinement_flags_occupancy
    _atom_site_refinement_flags_posn
    _atom_site_occupancy
    _atom_site_disorder_assembly
    _atom_site_disorder_group
    Fe Fe1 0.666667 0.333333 0.85627(8) 0.0321(7) Uani d T P S 1 . .
    N N1 0.5283(6) 0.1907(6) 0.7371(3) 0.0242(14) Uani d . . . 1 . .
    N N2 0.3858(6) 0.0349(6) 0.8150(3) 0.0313(15) Uani d . . . 1 . .
    N N3 0.666667 0.333333 0.9337(5) 0.047(3) Uani d T P S 1 . .
    C C1 0.5111(7) 0.1689(7) 0.8054(3) 0.0282(18) Uani d . . . 1 . .
    C C2 0.4142(8) 0.0685(7) 0.7051(3) 0.0317(18) Uani d . . . 1 . .
    H H2 0.401117 0.054779 0.65736 0.038 Uiso calc U . R 1 . .
    C C3 0.3235(8) -0.0295(8) 0.7529(4) 0.044(2) Uani d . . . 1 . .
    C C4 0.1879(10) -0.1853(11) 0.7440(4) 0.069(3) Uani d . . . 1 . .
    H H4 0.203282 -0.256235 0.772967 0.083 Uiso calc U . R 1 . .
    C C5 0.0490(10) -0.1874(11) 0.7682(5) 0.087(3) Uani d . . . 1 . .
    H H5A 0.064051 -0.149257 0.814863 0.131 Uiso calc U . R 1 . .
    H H5B -0.035563 -0.290393 0.76703 0.131 Uiso calc U . R 1 . .
    H H5C 0.027513 -0.123978 0.738574 0.131 Uiso calc U . R 1 . .
    C C6 0.1755(11) -0.2352(11) 0.6719(5) 0.087(3) Uani d . . . 1 . .
    H H6A 0.154316 -0.170938 0.642767 0.131 Uiso calc U . R 1 . .
    H H6B 0.094012 -0.339296 0.667884 0.131 Uiso calc U . R 1 . .
    H H6C 0.270006 -0.228258 0.657835 0.131 Uiso calc U . R 1 . .
    C C7 0.3298(8) -0.0407(8) 0.8820(3) 0.041(2) Uani d . . . 1 . .
    H H7 0.236104 -0.138285 0.873464 0.049 Uiso calc U . R 1 . .
    C C8 0.4434(9) -0.0753(9) 0.9136(4) 0.052(2) Uani d . . . 1 . .
    H H8A 0.4663 -0.133972 0.881647 0.078 Uiso calc U . R 1 . .
    H H8B 0.401918 -0.132875 0.955527 0.078 Uiso calc U . R 1 . .
    H H8C 0.535341 0.018666 0.92419 0.078 Uiso calc U . R 1 . .
    C C9 0.2889(9) 0.0533(8) 0.9280(4) 0.047(2) Uani d . . . 1 . .
    H H9A 0.379042 0.149573 0.937603 0.071 Uiso calc U . R 1 . .
    H H9B 0.246934 -0.000391 0.970713 0.071 Uiso calc U . R 1 . .
    H H9C 0.214644 0.070969 0.905131 0.071 Uiso calc U . R 1 . .
    C C10 0.666667 0.333333 0.6253(6) 0.049(4) Uani d T P S 1 . .
    C C11 0.7848(13) 0.4554(13) 0.5881(5) 0.044(3) Uani d . P . 0.6667 . .
    H H11 0.860764 0.530676 0.615722 0.053 Uiso calc U P R 0.6667 . .
    C C12 0.8067(19) 0.4816(16) 0.5198(7) 0.083(5) Uani d . P . 0.6667 . .
    H H12 0.892689 0.579571 0.504486 0.1 Uiso calc U P R 0.6667 . .
    C C13 0.780(3) 0.354(3) 0.4862(13) 0.059(7) Uani d . P . 0.3333 . .
    H H13 0.841(14) 0.339(5) 0.453(8) 0.071 Uiso d U P . 0.3333 . .
    B B1 0.666667 0.333333 0.7054(7) 0.031(4) Uani d T P S 1 . .

loop_
    _atom_site_aniso_label
    _atom_site_aniso_U_11
    _atom_site_aniso_U_22
    _atom_site_aniso_U_33
    _atom_site_aniso_U_12
    _atom_site_aniso_U_13
    _atom_site_aniso_U_23
    Fe1 0.0370(9) 0.0370(9) 0.0222(10) 0.0185(4) 0 0
    N1 0.023(3) 0.023(3) 0.028(3) 0.012(3) 0.001(3) -0.001(3)
    N2 0.033(4) 0.019(3) 0.035(4) 0.008(3) 0.006(3) 0.005(3)
    N3 0.061(5) 0.061(5) 0.018(6) 0.031(2) 0 0
    C1 0.030(4) 0.030(4) 0.026(4) 0.016(4) 0.005(3) 0.006(3)
    C2 0.033(4) 0.022(4) 0.028(4) 0.004(4) -0.004(3) -0.007(3)
    C3 0.039(5) 0.025(4) 0.041(5) -0.005(4) -0.002(4) -0.006(4)
    C4 0.052(6) 0.083(7) 0.044(5) 0.012(6) 0.003(5) 0.000(5)
    C5 0.050(7) 0.074(7) 0.110(9) 0.010(6) -0.019(6) 0.005(6)
    C6 0.069(7) 0.063(7) 0.083(8) -0.001(6) -0.014(6) -0.015(6)
    C7 0.047(5) 0.027(4) 0.035(4) 0.007(4) 0.012(4) 0.005(4)
    C8 0.072(6) 0.058(6) 0.041(5) 0.044(5) 0.013(4) 0.019(4)
    C9 0.050(5) 0.046(5) 0.038(5) 0.018(4) 0.023(4) 0.009(4)
    C10 0.061(6) 0.061(6) 0.025(7) 0.030(3) 0 0
    C11 0.039(7) 0.055(8) 0.033(7) 0.019(6) 0.005(6) 0.003(6)
    C12 0.137(17) 0.059(10) 0.047(9) 0.043(11) 0.031(10) 0.008(8)
    C13 0.08(2) 0.066(19) 0.050(17) 0.050(18) 0.024(15) 0.018(16)
    B1 0.034(5) 0.034(5) 0.027(8) 0.017(3) 0 0

_geom_special_details                   
;

All esds (except the esd in the dihedral angle between two l.s. planes)
are estimated using the full covariance matrix.  The cell esds are taken
into account individually in the estimation of esds in distances, angles
and torsion angles; correlations between esds in cell parameters are only
used when they are defined by crystal symmetry.  An approximate (isotropic)
treatment of cell esds is used for estimating esds involving l.s. planes.
;

loop_
    _geom_bond_atom_site_label_1
    _geom_bond_atom_site_label_2
    _geom_bond_site_symmetry_2
    _geom_bond_distance
    _geom_bond_publ_flag
    Fe1 N3 . 1.524(9) ?
    Fe1 C1 2_655 1.930(7) ?
    Fe1 C1 . 1.930(7) ?
    Fe1 C1 3_665 1.930(7) ?
    N1 C1 . 1.360(8) ?
    N1 C2 . 1.372(8) ?
    N1 B1 . 1.576(7) ?
    N2 C1 . 1.351(8) ?
    N2 C3 . 1.385(9) ?
    N2 C7 . 1.493(8) ?
    C2 C3 . 1.354(9) ?
    C2 H2 . 0.95 ?
    C3 C4 . 1.522(11) ?
    C4 C6 . 1.492(11) ?
    C4 C5 . 1.498(12) ?
    C4 H4 . 1.0 ?
    C5 H5A . 0.98 ?
    C5 H5B . 0.98 ?
    C5 H5C . 0.98 ?
    C6 H6A . 0.98 ?
    C6 H6B . 0.98 ?
    C6 H6C . 0.98 ?
    C7 C8 . 1.517(10) ?
    C7 C9 . 1.530(10) ?
    C7 H7 . 1.0 ?
    C8 H8A . 0.98 ?
    C8 H8B . 0.98 ?
    C8 H8C . 0.98 ?
    C9 H9A . 0.98 ?
    C9 H9B . 0.98 ?
    C9 H9C . 0.98 ?
    C10 C11 2_655 1.438(12) ?
    C10 C11 . 1.438(12) ?
    C10 C11 3_665 1.438(12) ?
    C10 B1 . 1.577(18) ?
    C11 C12 . 1.366(16) ?
    C11 H11 . 0.95 ?
    C12 C13 . 1.37(3) ?
    C12 C13 2_655 1.60(3) ?
    C12 H12 . 1.0 ?
    C13 C13 2_655 1.87(4) ?
    C13 C13 3_665 1.87(4) ?
    C13 H13 . 0.96(2) ?

loop_
    _geom_angle_atom_site_label_1
    _geom_angle_atom_site_label_2
    _geom_angle_atom_site_label_3
    _geom_angle_site_symmetry_1
    _geom_angle_site_symmetry_3
    _geom_angle
    _geom_angle_publ_flag
    N3 Fe1 C1 . 2_655 121.2(2) ?
    N3 Fe1 C1 . . 121.2(2) ?
    C1 Fe1 C1 2_655 . 95.6(3) ?
    N3 Fe1 C1 . 3_665 121.2(2) ?
    C1 Fe1 C1 2_655 3_665 95.6(3) ?
    C1 Fe1 C1 . 3_665 95.6(3) ?
    C1 N1 C2 . . 108.7(5) ?
    C1 N1 B1 . . 121.8(6) ?
    C2 N1 B1 . . 129.4(6) ?
    C1 N2 C3 . . 110.1(6) ?
    C1 N2 C7 . . 125.4(6) ?
    C3 N2 C7 . . 124.3(6) ?
    N2 C1 N1 . . 106.6(6) ?
    N2 C1 Fe1 . . 140.8(5) ?
    N1 C1 Fe1 . . 112.6(5) ?
    C3 C2 N1 . . 108.7(6) ?
    C3 C2 H2 . . 125.6 ?
    N1 C2 H2 . . 125.6 ?
    C2 C3 N2 . . 105.9(6) ?
    C2 C3 C4 . . 129.3(7) ?
    N2 C3 C4 . . 124.6(7) ?
    C6 C4 C5 . . 112.4(8) ?
    C6 C4 C3 . . 110.4(7) ?
    C5 C4 C3 . . 110.2(8) ?
    C6 C4 H4 . . 107.9 ?
    C5 C4 H4 . . 107.9 ?
    C3 C4 H4 . . 107.9 ?
    C4 C5 H5A . . 109.5 ?
    C4 C5 H5B . . 109.5 ?
    H5A C5 H5B . . 109.5 ?
    C4 C5 H5C . . 109.5 ?
    H5A C5 H5C . . 109.5 ?
    H5B C5 H5C . . 109.5 ?
    C4 C6 H6A . . 109.5 ?
    C4 C6 H6B . . 109.5 ?
    H6A C6 H6B . . 109.5 ?
    C4 C6 H6C . . 109.5 ?
    H6A C6 H6C . . 109.5 ?
    H6B C6 H6C . . 109.5 ?
    N2 C7 C8 . . 110.0(6) ?
    N2 C7 C9 . . 110.4(6) ?
    C8 C7 C9 . . 113.2(6) ?
    N2 C7 H7 . . 107.6 ?
    C8 C7 H7 . . 107.6 ?
    C9 C7 H7 . . 107.6 ?
    C7 C8 H8A . . 109.5 ?
    C7 C8 H8B . . 109.5 ?
    H8A C8 H8B . . 109.5 ?
    C7 C8 H8C . . 109.5 ?
    H8A C8 H8C . . 109.5 ?
    H8B C8 H8C . . 109.5 ?
    C7 C9 H9A . . 109.5 ?
    C7 C9 H9B . . 109.5 ?
    H9A C9 H9B . . 109.5 ?
    C7 C9 H9C . . 109.5 ?
    H9A C9 H9C . . 109.5 ?
    H9B C9 H9C . . 109.5 ?
    C11 C10 C11 2_655 . 96.4(8) ?
    C11 C10 C11 2_655 3_665 96.4(8) ?
    C11 C10 C11 . 3_665 96.4(8) ?
    C11 C10 B1 2_655 . 120.6(6) ?
    C11 C10 B1 . . 120.6(6) ?
    C11 C10 B1 3_665 . 120.6(6) ?
    C12 C11 C10 . . 131.1(12) ?
    C12 C11 H11 . . 114.5 ?
    C10 C11 H11 . . 114.5 ?
    C11 C12 C13 . . 110.5(15) ?
    C11 C12 C13 . 2_655 107.2(14) ?
    C13 C12 C13 . 2_655 78.(2) ?
    C11 C12 H12 . . 118.2 ?
    C13 C12 H12 . . 118.2 ?
    C13 C12 H12 2_655 . 118.2 ?
    C12 C13 C12 . 3_665 120.0(19) ?
    C12 C13 C13 . 2_655 56.7(17) ?
    C12 C13 C13 3_665 2_655 99.0(14) ?
    C12 C13 C13 . 3_665 108.5(15) ?
    C12 C13 C13 3_665 3_665 45.7(15) ?
    C13 C13 C13 2_655 3_665 59.998(9) ?
    C12 C13 H13 . . 130.(4) ?
    C12 C13 H13 3_665 . 106.(5) ?
    C13 C13 H13 2_655 . 137.(10) ?
    C13 C13 H13 3_665 . 118.(7) ?
    N1 B1 N1 2_655 3_665 105.4(5) ?
    N1 B1 N1 2_655 . 105.4(5) ?
    N1 B1 N1 3_665 . 105.4(5) ?
    N1 B1 C10 2_655 . 113.3(5) ?
    N1 B1 C10 3_665 . 113.3(5) ?
    N1 B1 C10 . . 113.3(5) ?

_shelx_res_file                         
;

TITL jsnmsuwtl167_90_a.res in P-3
    jsNMSUwtl167_90_sq.res
    created by SHELXL-2016/6 at 10:59:21 on 07-Jun-2017
REM Old TITL jsNMSUwtl167_90 in P-3
REM SHELXT solution in P-3
REM R1 0.235, Rweak 0.042, Alpha 0.050, Orientation as input
REM Formula found by SHELXT: C33 B2 N7 Fe
CELL 0.71073 10.3023 10.3023 19.6775 90 90 120
ZERR 1.99998 0.002 0.002 0.0041 0 0 0
LATT 1
SYMM -Y,+X-Y,+Z
SYMM +Y-X,-X,+Z
SFAC C H B Fe N
UNIT 66 100 2 2 14
EQIV $1 1-Y,+X-Y,+Z
DFIX 0.95 H13_$1 C13_$1
DFIX 2.46 H13_$1 H12_$1
DFIX 2.147 H13_$1 C12_$1

L.S. 5 0 8
PLAN  20
SIZE 0.125 0.152 0.34
TEMP -173.09
BOND $H
list 4
ABIN
fmap 2
acta
REM <olex2.extras>
REM <HklSrc "%.\\jsNMSUwtl167_90_sq.hkl">
REM </olex2.extras>

WGHT    0.138700
FVAR       0.73508
FE1   4    0.666667    0.333333    0.856266    10.33333    0.03700    0.03700 =
         0.02221    0.00000    0.00000    0.01850
N1    5    0.528312    0.190688    0.737069    11.00000    0.02258    0.02334 =
         0.02760   -0.00110    0.00067    0.01209
N2    5    0.385820    0.034894    0.814973    11.00000    0.03304    0.01929 =
         0.03490    0.00508    0.00633    0.00818
N3    5    0.666667    0.333333    0.933717    10.33333    0.06110    0.06110 =
         0.01756    0.00000    0.00000    0.03055
C1    1    0.511052    0.168861    0.805406    11.00000    0.03039    0.02955 =
         0.02650    0.00624    0.00530    0.01637
C2    1    0.414249    0.068457    0.705126    11.00000    0.03253    0.02180 =
         0.02812   -0.00655   -0.00388    0.00398
AFIX  43
H2    2    0.401117    0.054779    0.657360    11.00000   -1.20000
AFIX   0
C3    1    0.323483   -0.029462    0.752914    11.00000    0.03856    0.02509 =
         0.04072   -0.00628   -0.00234   -0.00505
C4    1    0.187868   -0.185326    0.743990    11.00000    0.05179    0.08325 =
         0.04372   -0.00016    0.00252    0.01197
AFIX  13
H4    2    0.203282   -0.256235    0.772967    11.00000   -1.20000
AFIX   0
C5    1    0.048954   -0.187419    0.768209    11.00000    0.04999    0.07395 =
         0.10952    0.00504   -0.01929    0.01024
AFIX 137
H5A   2    0.064051   -0.149257    0.814863    11.00000   -1.50000
H5B   2   -0.035563   -0.290393    0.767030    11.00000   -1.50000
H5C   2    0.027513   -0.123978    0.738574    11.00000   -1.50000
AFIX   0
C6    1    0.175489   -0.235234    0.671940    11.00000    0.06879    0.06323 =
         0.08345   -0.01519   -0.01425   -0.00136
AFIX 137
H6A   2    0.154316   -0.170938    0.642767    11.00000   -1.50000
H6B   2    0.094012   -0.339296    0.667884    11.00000   -1.50000
H6C   2    0.270006   -0.228258    0.657835    11.00000   -1.50000
AFIX   0
C7    1    0.329781   -0.040709    0.882003    11.00000    0.04653    0.02672 =
         0.03517    0.00543    0.01219    0.00748
AFIX  13
H7    2    0.236104   -0.138285    0.873464    11.00000   -1.20000
AFIX   0
C8    1    0.443389   -0.075282    0.913642    11.00000    0.07211    0.05813 =
         0.04077    0.01891    0.01258    0.04392
AFIX 137
H8A   2    0.466300   -0.133972    0.881647    11.00000   -1.50000
H8B   2    0.401918   -0.132875    0.955527    11.00000   -1.50000
H8C   2    0.535341    0.018666    0.924190    11.00000   -1.50000
AFIX   0
C9    1    0.288927    0.053315    0.927998    11.00000    0.04972    0.04599 =
         0.03839    0.00878    0.02345    0.01836
AFIX 137
H9A   2    0.379042    0.149573    0.937603    11.00000   -1.50000
H9B   2    0.246934   -0.000391    0.970713    11.00000   -1.50000
H9C   2    0.214644    0.070969    0.905131    11.00000   -1.50000
AFIX   0
C10   1    0.666667    0.333333    0.625274    10.33333    0.06098    0.06098 =
         0.02541    0.00000    0.00000    0.03049
C11   1    0.784849    0.455379    0.588084    10.66667    0.03853    0.05482 =
         0.03254    0.00262    0.00459    0.01896
AFIX  43
H11   2    0.860764    0.530676    0.615722    10.66667   -1.20000
AFIX   0
C12   1    0.806712    0.481649    0.519839    10.66667    0.13708    0.05855 =
         0.04665    0.00798    0.03148    0.04292
AFIX  13
H12   2    0.892689    0.579571    0.504486    10.66667   -1.20000
AFIX   0
C13   1    0.780384    0.354185    0.486245    10.33333    0.07934    0.06592 =
         0.05022    0.01826    0.02423    0.05020
H13   2    0.840768    0.339371    0.453170    10.33333   -1.20000
B1    3    0.666667    0.333333    0.705417    10.33333    0.03378    0.03378 =
         0.02651    0.00000    0.00000    0.01689
HKLF 4


REM  jsnmsuwtl167_90_a.res in P-3
REM R1 =  0.0848 for     928 Fo > 4sig(Fo)  and  0.1633 for all    1758 data
REM    146 parameters refined using      3 restraints

END

WGHT      0.1387      0.0000

REM Highest difference peak  1.506,  deepest hole -0.514,  1-sigma level  0.096
Q1    1   0.0000  0.0000  0.8206  10.33333  0.05    1.51
Q2    1   0.3333 -0.3333  0.8910  10.33333  0.05    1.08
Q3    1   0.0772 -0.1363  0.6659  11.00000  0.05    0.65
Q4    1   0.1117 -0.3157  0.7371  11.00000  0.05    0.55
Q5    1   0.1345 -0.1329  0.7205  11.00000  0.05    0.46
Q6    1   0.1369 -0.0209  0.6945  11.00000  0.05    0.45
Q7    1   0.0000  0.0000  0.8877  10.33333  0.05    0.38
Q8    1   0.9557  0.6123  0.4998  11.00000  0.05    0.36
Q9    1   0.1581 -0.0938  0.9413  11.00000  0.05    0.35
Q10   1   0.9160  0.4358  0.5969  11.00000  0.05    0.32
Q11   1   0.2466 -0.0094  0.6635  11.00000  0.05    0.31
Q12   1   0.2150 -0.0964  0.8798  11.00000  0.05    0.31
Q13   1   0.1085 -0.0189  0.7786  11.00000  0.05    0.31
Q14   1   0.6667  0.3333  0.4693  10.33333  0.05    0.30
Q15   1   0.3440 -0.1776  0.8545  11.00000  0.05    0.29
Q16   1   0.3346  0.0316  0.7870  11.00000  0.05    0.28
Q17   1   0.0837 -0.4450  0.7208  11.00000  0.05    0.27
Q18   1   0.2632  0.0041  0.7355  11.00000  0.05    0.27
Q19   1   0.3333 -0.3333  0.9593  10.33333  0.05    0.27
Q20   1   0.3333 -0.3333  0.8284  10.33333  0.05    0.26
;
_shelx_res_checksum                     25920

_shelx_hkl_file                         
;
   1   0   0 1874.01   47.50
   0  -1   0 1805.62   40.90
   1   0   0 1704.13   37.70
  -1   1   0 1741.13   52.69
  -1   1   0 1910.51   54.99
   0  -1   0 1741.73   40.10
  -1   0   0 1636.74   35.40
   0   1   0 1683.43   40.90
   1  -1   0 1736.63   52.79
   1  -1   0 1820.22   53.39
  -1   0   0 1722.83   35.50
   1  -2   0  615.24   44.70
  -2   1   0  654.33   43.60
   2  -1   0  496.55   28.00
   2  -1   0  580.64   43.90
   2  -1   0  578.74   44.10
  -1   2   0  560.74   44.40
  -1   2   0  552.84   44.50
  -2   2   0  657.83   58.59
   2   0   0  660.03   34.90
   0  -2   0  614.84   36.00
   2   0   0  635.44   34.80
   2   0   0  650.53   46.30
   0   2   0  701.13   54.09
  -2   0   0  651.23   29.60
   2  -2   0  669.93   54.59
   0   2   0  601.54   38.50
   2  -3   0 1339.77   73.79
  -3   1   0 1392.26   63.99
   1   2   0 1232.68   37.80
  -2   3   0 1239.18   76.89
   3  -1   0 1329.27   66.39
   3  -1   0 1457.55   68.99
   1  -3   0  109.49   32.50
   2   1   0  159.78   39.20
  -3   2   0  142.89   38.30
   3  -2   0   30.60   32.70
  -1   3   0  149.49   35.40
  -1   3   0   90.69   34.10
   0  -3   0 4243.98   97.19
   3   0   0 4205.38   98.99
  -3   3   0 4202.88  137.49
   3   0   0 4421.26  100.59
   3  -3   0 4256.97  133.89
   0   3   0 4284.27  106.19
   0   3   0 4135.69  106.49
  -3   0   0 4043.10   89.99
   1   3   0  241.88   31.90
   1   3   0  210.68   30.10
  -4   1   0  276.17   40.90
   3  -4   0  311.87   56.19
   4  -1   0  314.27   46.70
  -3   4   0  266.67   55.79
  -4   2   0  186.58   41.90
   2   2   0  111.29   45.20
   2  -4   0   66.69   36.70
   4  -2   0  118.79   23.00
   4  -2   0  107.09   40.10
  -2   4   0  198.48   45.70
   1  -4   0  140.39   37.20
   3   1   0  137.59   20.40
  -4   3   0   71.39   40.90
   3   1   0  148.29   20.50
   3   1   0  174.28   45.00
  -1   4   0  107.29   38.00
   4  -3   0  143.59   45.30
  -1   4   0  150.48   41.10
   0  -4   0  419.76   41.10
   4   0   0  335.27   42.00
   4   0   0  395.86   45.70
  -4   4   0  306.27   62.49
   0   4   0  361.06   48.60
   0   4   0  370.16   48.70
   4  -4   0  476.85   69.29
  -5   1   0  276.27   40.70
   1   4   0  182.58   35.60
   4  -5   0  147.19   53.49
   1   4   0  316.77   40.20
  -4   5   0  296.27   65.39
   5  -1   0  235.98   48.70
  -5   2   0  491.55   59.99
   3  -5   0  500.85   71.69
   2   3   0  379.26   28.00
   5  -2   0  428.56   60.39
  -3   5   0  462.35   74.69
   5  -2   0  505.35   66.79
  -5   3   0   48.40   39.40
   2  -5   0   30.10   34.00
   3   2   0    8.90   35.80
   5  -3   0   16.70   36.20
   5  -3   0   -0.70   22.60
  -2   5   0   39.40   39.90
   4   1   0  649.43   42.40
   4   1   0  717.23   71.99
   4   1   0  711.43   45.00
   1  -5   0  636.94   61.79
  -5   4   0  810.22   86.99
  -1   5   0  798.32   74.09
   5  -4   0  806.52   80.59
  -1   5   0  686.53   69.29
   5   0   0   -2.50   26.70
  -5   5   0   55.39   51.59
   5   0   0   -3.30   25.30
   0   5   0    7.80   29.70
   5  -5   0  -61.09   38.40
   0   5   0   15.60   33.10
   1   5   0  330.57   49.10
   1   5   0  293.07   49.70
   5  -6   0  338.37   78.69
  -5   6   0  380.06   82.09
   6  -1   0  350.26   58.69
   2   4   0  366.16   40.00
  -6   2   0  415.26   56.19
   2   4   0  291.97   37.30
   4  -6   0  477.45   77.09
  -4   6   0  402.06   78.19
   6  -2   0  448.26   64.69
   6  -2   0  331.77   63.09
   3  -6   0 1337.37   96.59
  -6   3   0 1293.27   92.39
   3   3   0 1255.27  101.89
   6  -3   0 1350.76   98.19
  -3   6   0 1288.67  105.79
   2  -6   0   96.49   42.90
   4   2   0  137.59   56.29
  -6   4   0  178.88   60.59
   4   2   0  118.99   20.90
   4   2   0  116.69   19.60
   6  -4   0  142.29   33.60
   6  -4   0  171.78   56.09
  -2   6   0  184.48   55.09
   1  -6   0  -62.29   33.20
   5   1   0   27.70   24.40
   5   1   0  -23.10   22.80
  -6   5   0  -46.70   50.19
   5   1   0   79.29   42.80
  -1   6   0  -45.00   40.70
   6  -5   0  -29.40   48.40
  -6   6   0 1926.51  139.19
   6   0   0 2014.30   99.19
   6   0   0 2148.39  100.69
   0   6   0 2022.10  109.99
   6  -6   0 2287.57  141.49
   0   6   0 2086.49  109.59
   6  -7   0  191.38   73.89
   1   6   0  176.48   68.49
   1   6   0   39.10   42.30
  -6   7   0  278.57   86.39
   7  -1   0  190.38   57.39
   2   5   0  252.57   43.40
   5  -7   0  333.37   73.79
   2   5   0  258.07   41.30
  -5   7   0  286.67   76.79
   7  -2   0  349.27   67.69
   3   4   0  127.69   63.29
   4  -7   0  111.19   54.79
   3   4   0   80.59   23.40
  -7   3   0   71.49   41.70
   3   4   0   67.19   22.80
  -4   7   0   64.29   60.59
   7  -3   0  143.39   52.89
   3  -7   0  108.29   48.60
  -7   4   0   71.09   47.90
   4   3   0  257.77   69.79
   7  -4   0   82.39   54.59
  -3   7   0  105.69   57.59
   7  -4   0  185.48   33.00
   5   2   0  196.18   31.60
  -7   5   0  170.18   62.69
   2  -7   0  278.87   58.59
   5   2   0  202.98   31.20
   5   2   0  219.88   71.29
   7  -5   0  125.69   61.69
  -2   7   0  186.28   60.29
   7  -5   0  135.59   38.90
  -7   6   0  624.34  106.79
   6   1   0  600.14   60.59
   6   1   0  470.35   54.89
  -1   7   0  519.25   87.49
   7  -6   0  568.44   94.49
  -7   7   0  857.21  124.29
   7   0   0  807.62   88.19
   7  -7   0  625.14  105.29
   0   7   0  899.81   96.29
   7  -8   0  632.34  109.69
   1   7   0  646.84   86.69
  -7   8   0  698.13  126.49
   8  -1   0  448.16   82.59
   6  -8   0   -4.50   57.09
   2   6   0  -47.70   38.00
  -6   8   0  -93.79   60.29
   8  -2   0  -96.19   46.90
   5  -8   0   31.40   53.39
   3   5   0  -69.69   51.69
   3   5   0   12.60   25.40
   3   5   0   41.90   28.20
  -5   8   0  116.29   66.49
   8  -3   0  -25.30   47.90
   4  -8   0  409.16   84.69
   4   4   0  329.07   85.39
  -4   8   0  210.18   78.99
   8  -4   0  230.68   74.99
   5   3   0   -6.40   54.69
  -8   5   0 -115.39   44.10
  -3   8   0  -10.60   60.49
   8  -5   0  -62.59   45.90
   6   2   0  117.39   65.29
   6   2   0  105.89   32.20
   6   2   0   74.99   32.30
  -8   6   0   80.19   73.59
   8  -6   0   67.59   64.29
  -2   8   0  191.68   71.09
  -8   7   0 2026.40  162.78
   7   1   0 1878.21  104.29
   8  -7   0 2074.79  161.98
  -1   8   0 1698.93  140.39
  -8   8   0  107.79   88.29
   8   0   0  294.67   71.59
   8  -8   0  326.37   96.79
   0   8   0   59.19   69.09
   8  -9   0   30.50   76.29
   1   8   0  -12.20   57.59
  -8   9   0   12.60   83.09
   9  -1   0   84.69   58.89
   7  -9   0   48.80   70.99
   2   7   0   77.89   52.39
   9  -2   0   78.99   62.69
  -7   9   0 -171.78   66.79
   3   6   0  131.69   85.19
   3   6   0  175.78   48.60
   9  -3   0  276.57   82.89
  -6   9   0  108.59   86.09
   4   5   0    5.30   67.19
   4   5   0   -0.20   18.70
  -5   9   0   31.30   81.29
   9  -4   0  -55.39   51.69
   5   4   0  240.78   84.19
  -4   9   0  354.56   95.79
   9  -5   0  372.16   93.19
   6   3   0  112.99   76.79
   6   3   0  175.58   27.70
  -3   9   0  131.39   74.49
   9  -6   0  110.99   71.89
   7   2   0   -0.50   33.00
  -2   9   0  -63.39   53.49
   9  -7   0   -7.90   62.99
   8   1   0  -88.99   41.90
  -9   8   0   33.20   84.59
   9  -8   0  105.89   77.59
  -1   9   0   63.89   74.79
  -9   9   0   71.49   91.19
   9   0   0   34.40   56.59
   0   9   0   93.09   75.09
   9  -9   0   76.89   84.39
   9 -10   0  -15.20   78.49
   1   9   0   51.79   67.39
  -9  10   0   78.29  102.29
  10  -1   0   29.60   63.49
   2   8   0  147.39   65.79
  10  -2   0  -21.00   62.89
  -8  10   0   83.79   99.19
   3   7   0   61.39   47.50
   3   7   0   42.20   86.09
  10  -3   0   39.60   62.49
  -7  10   0  116.79   98.99
   4   6   0  -16.20   29.10
   4   6   0  -25.80   75.89
  10  -4   0  -23.70   62.49
  -6  10   0   67.39   93.19
   5   5   0   65.99   74.19
  -5  10   0 -109.99   76.99
  10  -5   0   -3.00   65.89
   6   4   0   10.10   82.49
  10  -6   0  -20.80   66.49
  -4  10   0   27.20   83.49
   7   3   0   11.80   27.00
   7   3   0   17.60   74.39
  10  -7   0  -90.09   55.59
  -3  10   0   31.30   72.99
   8   2   0    7.00   39.60
  10  -8   0  181.68   88.79
  -2  10   0  -37.70   80.49
   9   1   0   36.70   51.69
  -1  10   0   33.00   79.49
  10  -9   0   44.80   86.19
   3   8   0   -7.00   80.89
   3   8   0  -78.79   49.70
  11  -3   0  -42.80   69.39
  -8  11   0  -97.39   94.29
   4   7   0  134.79   41.80
   4   7   0  229.28   91.89
  -7  11   0  550.44  143.89
  11  -4   0  149.59   84.99
   5   6   0  143.09  106.69
  11  -5   0   74.69   73.09
  -6  11   0   83.69  102.29
   6   5   0   70.69   90.69
  -5  11   0  -96.99   86.89
  11  -6   0  -23.80   65.99
   7   4   0   39.70   97.99
  -4  11   0  251.77  106.89
  11  -7   0   10.60   73.09
   8   3   0  141.59   49.40
  11  -8   0  -73.89   71.49
  -3  11   0  127.39   98.99
   0   1  -1 3596.54   71.59
  -1   0  -1 4032.20   67.49
  -1   0  -1 3604.44   69.09
   1  -1  -1 3578.54   83.59
   1  -1  -1 3831.12   84.79
   1   0   1 3693.83   70.09
   0  -1   1 3675.43   71.19
  -1   1   1 3861.11   85.09
  -1   1   1 3635.64   82.69
   1   0   1 3748.53   81.49
   0  -1   1 3824.92   69.09
   1   0   1 3795.42   68.99
   0  -1  -1 1043.50   35.80
  -1   1  -1 1106.79   43.60
   0  -1  -1 1093.79   33.70
  -1   1  -1 1074.59   44.50
   1   0  -1 1133.19   31.90
   1  -1   1 1128.29   44.40
  -1   0   1 1013.00   32.50
  -1   0   1 1127.49   30.10
   0   1   1 1062.19   34.70
   1  -1   1 1037.40   43.20
  -1   2  -1 2733.83   84.19
  -1   2  -1 2527.15   78.69
   2  -1  -1 2639.24   79.99
   2  -1  -1 2703.33   79.99
  -2   1   1 2541.25   76.89
   1   1   1 2502.15   49.30
   1   1   1 2508.15   48.40
   1  -2   1 2577.74   79.59
  -1   3  -1 3807.22  113.19
  -1   3  -1 3912.01  117.89
   3  -2  -1 4026.80  123.89
   1  -3   1 4108.19  113.99
   2   1   1 4061.69   69.19
   2   1   1 4135.39  119.49
  -3   2   1 3742.93  118.59
   2   1   1 3894.81   72.09
  -2   0  -1 4891.11   88.59
   2  -2  -1 4940.71  127.39
   0   2  -1 4781.82  104.59
   2   0   1 4970.00  108.69
   2   0   1 4540.95   96.89
   2   0   1 4805.62   95.59
   0  -2   1 4755.52   94.59
  -2   2   1 4900.01  127.79
   1   1  -1 7275.77  155.98
   1  -2  -1 7674.23  150.18
  -2   1  -1 7367.06  145.09
   2  -1   1 7247.68  135.49
   2  -1   1 7833.52  150.98
   2  -1   1 7622.84  149.69
  -1   2   1 7620.54  151.48
  -1   2   1 7652.13  151.98
  -2   2  -1 4511.55  122.19
   2   0  -1 4548.35   89.99
   2   0  -1 4441.06   93.09
   0  -2  -1 4376.16   94.89
  -2   0   1 4505.55   85.39
   2  -2   1 4453.85  119.99
   0   2   1 4521.45   96.69
   3  -1  -1 1426.56   69.49
  -2   3  -1 1344.67   80.29
   3  -1  -1 1395.26   68.39
   2  -3   1 1368.06   75.49
   1   2   1 1431.96   41.70
  -3   1   1 1286.87   64.99
   1   2   1 1352.06   44.90
   4  -2  -1   10.90   31.80
  -2   4  -1    2.00   33.00
   2  -4   1  -36.00   28.60
   2   2   1  -34.50   10.60
  -4   2   1   16.20   28.50
   2   2   1   16.70   10.10
  -2   5  -1  -20.10   37.80
   5  -3  -1   18.60   14.90
   5  -3  -1  -47.60   35.70
   3   2   1  -13.80   11.60
   2  -5   1  -19.80   29.40
   3   2   1   16.50   11.60
   3   2   1  -11.50   36.40
  -5   3   1    3.30   34.30
  -1   4  -1  295.17   46.80
   4  -3  -1  431.56   64.49
  -1   4  -1  399.86   56.09
   1  -4   1  248.58   41.10
   3   1   1  302.97   53.39
  -4   3   1  208.48   52.19
   3   1   1  308.47   27.20
   3   1   1  278.37   29.20
   3  -3  -1  753.12   70.89
   0   3  -1  870.01   49.00
  -3   0  -1  742.83   35.50
   0   3  -1  853.91   52.59
   3   0   1  803.22   43.30
   0  -3   1  780.92   42.30
   3   0   1  684.93   43.90
  -3   3   1  799.02   70.19
   3   0   1  686.13   54.19
   1   2  -1  187.58   22.90
  -3   1  -1  260.77   40.90
   2  -3  -1  265.57   44.50
   1   2  -1  283.17   22.70
  -2   3   1  252.17   45.70
   3  -1   1  273.27   41.30
   3  -1   1  245.58   42.20
   3  -1   1  324.67   37.00
   2   1  -1  664.83   19.00
  -3   2  -1  503.55   58.39
   2   1  -1  574.54   21.60
   1  -3  -1  715.73   54.79
   2   1  -1  604.14   57.79
   3  -2   1  717.13   60.99
  -1   3   1  614.04   54.29
  -1   3   1  631.24   55.99
   3   0  -1 1710.53   62.89
   0  -3  -1 1785.12   63.49
  -3   3  -1 1752.72   92.29
   3   0  -1 1798.62   64.29
   0   3   1 1885.51  106.39
   3  -3   1 1739.93   90.69
  -3   0   1 1726.93   53.09
   0   3   1 1637.14   67.69
  -3   4  -1  545.45   73.19
   4  -1  -1  486.25   53.69
   3  -4   1  454.15   64.09
   1   3   1  466.25   38.10
  -4   1   1  398.36   46.40
   5  -2  -1 1241.88   88.79
  -3   5  -1 1228.08   95.29
   5  -2  -1 1306.27   89.89
   3  -5   1 1285.37   92.99
  -5   2   1 1267.67   82.49
   2   3   1 1203.78   44.50
   2   3   1 1188.98   48.70
   6  -3  -1  751.42   84.69
  -3   6  -1  890.81   93.99
   3   3   1  801.82   32.20
   3   3   1  790.72   33.20
   3  -6   1  723.13   83.09
   3   3   1  841.02   91.29
  -6   3   1  798.72   81.69
  -3   7  -1  579.04   89.39
   7  -4  -1  593.94   86.79
  -7   4   1  404.96   77.79
   4   3   1  447.96   79.59
   4   3   1  546.05   28.50
   4   3   1  515.75   27.90
   3  -7   1  455.55   75.79
   6  -4  -1  -13.70   39.20
  -2   6  -1   -3.40   39.90
   6  -4  -1  -12.10   17.80
   4   2   1    6.80   35.40
   2  -6   1  -15.40   28.50
   4   2   1    9.70   13.30
   4   2   1  -13.90   15.70
  -6   4   1  -44.40   35.10
  -1   5  -1 2741.83  114.59
   5  -4  -1 2585.94  131.59
  -1   5  -1 2785.22  120.69
   4   1   1 2642.94   79.39
   4   1   1 2631.44  120.49
  -5   4   1 2610.84  132.09
   1  -5   1 2755.22  105.09
   4   1   1 2657.53   76.09
   4  -4  -1 1189.88   91.49
   0   4  -1 1028.90   65.99
   0   4  -1 1200.58   67.29
   4   0   1 1153.78   60.09
   4   0   1 1140.09   62.99
  -4   4   1 1142.39   90.69
   0  -4   1 1221.18   55.69
   1   3  -1  191.68   29.50
  -4   1  -1  247.58   42.00
   3  -4  -1  182.18   47.50
   1   3  -1  185.38   28.00
   4  -1   1  225.28   39.70
  -3   4   1  159.38   47.10
   2  -4  -1 1697.73   85.49
  -4   2  -1 1630.84   84.59
   2   2  -1 1516.85   91.89
   4  -2   1 1641.34   85.19
  -2   4   1 1592.54   90.19
   4  -2   1 1579.24   65.29
   3   1  -1  473.75   29.70
  -4   3  -1  489.55   67.89
   1  -4  -1  539.15   54.59
   3   1  -1  527.05   63.79
   3   1  -1  489.25   30.90
   4  -3   1  598.94   68.59
  -1   4   1  436.56   53.59
  -1   4   1  582.64   58.89
   0  -4  -1  848.52   51.59
   4   0  -1  811.92   53.79
   4   0  -1  778.42   56.19
  -4   4  -1  854.81   81.39
   0   4   1  749.33   58.39
   4  -4   1  782.12   80.39
   0   4   1  758.22   60.19
  -4   5  -1 1419.16  109.59
   5  -1  -1 1534.45   86.89
  -5   1   1 1510.25   71.19
   1   4   1 1632.84   71.29
   1   4   1 1558.24   71.39
   4  -5   1 1622.14  105.29
   6  -2  -1  387.96   68.99
  -4   6  -1  473.45   82.99
   6  -2  -1  292.97   64.09
   4  -6   1  360.06   68.49
   2   4   1  313.37   41.90
  -6   2   1  338.07   56.09
   2   4   1  351.26   40.10
  -4   7  -1  157.98   68.09
   7  -3  -1   59.19   53.39
  -7   3   1  278.37   56.89
   3   4   1  187.38   28.70
   3   4   1  222.28   67.49
   4  -7   1  180.08   59.69
   8  -4  -1  -22.10   47.60
  -4   8  -1   30.20   60.09
   4   4   1    7.90   15.70
   4  -8   1   13.90   55.69
   4   4   1    5.30   54.59
   9  -5  -1   85.19   67.49
  -4   9  -1   28.50   78.09
   5   4   1  256.57   85.49
  -3   8  -1  282.57   81.19
   8  -5  -1  350.26   85.59
  -8   5   1  327.97   86.49
   5   3   1  270.57   29.40
   5   3   1  450.35   91.99
   7  -5  -1  -10.50   24.20
   7  -5  -1   83.19   58.09
  -2   7  -1   71.49   53.79
   5   2   1   44.30   21.60
   5   2   1   39.30   20.40
  -7   5   1   33.10   48.50
   5   2   1   14.00   48.20
   2  -7   1    8.70   36.60
  -1   6  -1 1286.57  101.39
   6  -5  -1 1239.58  107.69
  -1   6  -1 1545.95  100.29
   5   1   1 1235.78   66.19
  -6   5   1 1379.66  118.79
   1  -6   1 1415.46   82.19
   5   1   1 1495.95  102.19
   5   1   1 1357.26   68.39
   0   5  -1  233.38   48.20
   0   5  -1  406.76   52.29
   5  -5  -1  324.47   65.49
   5   0   1  309.57   46.00
  -5   5   1  348.27   71.99
   5   0   1  365.66   50.19
   4  -5  -1   96.59   47.80
   1   4  -1  131.89   29.70
   1   4  -1  143.59   32.80
  -5   1  -1  136.59   30.60
  -4   5   1  168.08   56.09
   5  -1   1  126.69   41.30
  -5   2  -1  320.87   53.59
   3  -5  -1  286.67   55.59
   2   3  -1  403.56   26.60
   2   3  -1  416.46   70.79
   2   3  -1  331.17   27.70
   5  -2   1  362.96   57.49
  -3   5   1  454.75   71.39
   5  -2   1  380.76   60.29
   2  -5  -1   -1.80   29.50
  -5   3  -1   13.10   37.30
   3   2  -1   29.40   36.80
   5  -3   1  -31.40   24.10
   5  -3   1   13.20   37.70
  -2   5   1    7.70   37.10
   4   1  -1   68.79   24.10
  -5   4  -1  113.29   50.19
   1  -5  -1   75.59   36.20
   4   1  -1   80.99   22.10
   4   1  -1   92.99   47.00
  -1   5   1  115.59   42.80
  -1   5   1  107.19   39.30
   5  -4   1  110.39   47.80
   5   0  -1 1195.38   73.69
  -5   5  -1 1175.28  103.59
   5   0  -1 1267.57   74.99
   5  -5   1 1279.27  104.09
   0   5   1 1325.77   82.49
   0   5   1 1213.88   81.49
   6  -1  -1   17.70   38.10
  -5   6  -1   -3.50   50.99
   1   5   1   52.09   32.60
   1   5   1   22.60   28.50
   5  -6   1   10.70   43.90
   7  -2  -1  192.38   59.29
  -5   7  -1  323.67   81.69
   2   5   1  278.77   45.90
   5  -7   1  340.47   80.59
   2   5   1  282.97   44.40
  -5   8  -1  213.48   69.79
   8  -3  -1   61.89   49.60
   5  -8   1  -31.40   50.39
   3   5   1  100.59   72.09
   3   5   1   41.70   29.80
   3   5   1   37.60   28.70
   9  -4  -1   -1.40   51.99
  -5   9  -1  -74.59   60.89
   4   5   1   -1.70   23.30
   4   5   1    0.00   65.09
  -5  10  -1    6.20   88.19
  10  -5  -1   11.90   69.79
   5   5   1   96.29   86.09
  11  -6  -1  144.19   90.99
  -5  11  -1  238.78  120.39
   6   5   1   34.40   91.09
  10  -6  -1   64.39   73.69
  -4  10  -1  -87.89   73.89
   6   4   1   15.10   74.69
  -3   9  -1   46.00   65.79
   9  -6  -1   52.29   61.89
   6   3   1   23.80   24.00
   6   3   1  174.48   81.59
  -2   8  -1  186.58   69.99
   8  -6  -1   93.59   68.89
   6   2   1  203.08   40.40
  -8   6   1   52.29   64.39
   6   2   1  350.56   88.79
   6   2   1  180.48   45.90
   7  -6  -1  237.68   76.59
  -1   7  -1  345.97   74.99
  -7   6   1  418.76   91.79
   6   1   1  229.68   45.00
   6   1   1  402.26   58.29
   0   6  -1  -27.70   35.50
   0   6  -1   69.59   45.30
   6  -6  -1   31.30   53.49
   6   0   1   46.90   29.50
  -6   6   1   59.89   59.99
   6   0   1   21.50   35.70
   1   5  -1  341.27   47.20
   1   5  -1  334.67   52.69
   5  -6  -1  219.18   67.29
  -5   6   1  253.97   75.29
   6  -1   1  359.76   60.49
   2   4  -1  -17.40   18.80
   4  -6  -1   24.10   43.50
  -6   2  -1    8.60   35.40
   2   4  -1   38.60   23.30
   6  -2   1   -8.40   35.80
  -4   6   1    5.70   46.80
   6  -2   1   50.79   37.60
   3   3  -1  469.85   75.39
  -6   3  -1  423.96   68.89
   3  -6  -1  360.16   64.59
   6  -3   1  494.65   73.19
  -3   6   1  408.16   74.99
   6  -3   1  472.35   45.80
  -6   4  -1  473.05   76.49
   4   2  -1  442.46   80.39
   2  -6  -1  426.16   62.89
   4   2  -1  282.07   27.50
   4   2  -1  315.67   27.40
  -2   6   1  385.36   69.59
   6  -4   1  329.27   49.90
   6  -4   1  402.36   72.09
   5   1  -1 1228.78  100.39
   5   1  -1 1103.89   64.49
  -6   5  -1 1190.48  111.19
   1  -6  -1 1015.60   76.89
   5   1  -1  897.51   61.29
  -1   6   1 1139.29   89.39
  -1   6   1  976.70   90.29
   6  -5   1  990.60  103.59
   6   0  -1  250.37   56.39
  -6   6  -1  362.46   87.89
   6   0  -1  209.38   50.49
   0   6   1  230.88   56.19
   0   6   1  240.18   58.69
   6  -6   1  308.97   79.29
   7  -1  -1  521.55   80.29
  -6   7  -1  565.54  101.19
   6  -7   1  536.15   94.59
   1   6   1  505.25   70.49
   8  -2  -1  460.95   83.79
  -6   8  -1  421.66  101.09
   6  -8   1  328.87   87.79
   2   6   1  372.46   62.29
   9  -3  -1   -2.80   54.79
  -6   9  -1  -14.20   66.89
   3   6   1  -62.39   65.69
   3   6   1    7.30   33.00
  10  -4  -1  -45.70   64.29
  -6  10  -1  210.78  105.19
   4   6   1   28.50   81.49
   4   6   1    3.80   31.00
  11  -5  -1   43.00   71.99
  -6  11  -1  243.18  118.39
   5   6   1  113.59   89.69
  -4  11  -1  143.99  105.19
  11  -7  -1   30.30   78.79
   7   4   1  -27.10   89.09
  10  -7  -1   13.20   77.39
  -3  10  -1  127.79   76.09
   7   3   1   50.39   30.80
   7   3   1  127.29   91.49
  -2   9  -1  -26.20   60.49
   9  -7  -1  116.79   73.99
   7   2   1   27.60   32.90
   8  -7  -1  122.99   79.59
  -1   8  -1  135.89   81.59
  -8   7   1  240.28   97.19
   7   1   1  244.18   58.09
   0   7  -1  466.85   85.39
   7  -7  -1  412.36   90.59
  -7   7   1  748.43  123.89
   7   0   1  477.95   74.89
   6  -7  -1   66.39   56.19
   1   6  -1  106.99   48.10
   7  -1   1  139.69   52.49
  -6   7   1   99.29   68.99
   5  -7  -1  193.08   59.99
   2   5  -1  141.69   34.00
   2   5  -1  182.78   39.90
  -5   7   1  208.28   70.49
   7  -2   1  180.98   60.89
   3   4  -1  330.97   33.30
   3   4  -1  370.26   32.70
   4  -7  -1  332.07   72.29
   3   4  -1  545.55   96.89
  -7   3  -1  459.65   69.09
  -4   7   1  368.36   80.09
   7  -3   1  383.76   73.59
  -7   4  -1   10.30   40.70
   3  -7  -1   63.89   45.70
   4   3  -1   32.00   42.90
  -3   7   1  -41.30   45.60
   7  -4   1   17.10   23.70
   7  -4   1  -48.40   39.80
   5   2  -1   96.29   27.70
  -7   5  -1  206.48   64.09
   5   2  -1  170.88   63.99
   5   2  -1   41.20   25.00
   2  -7  -1  150.38   49.99
   7  -5   1  115.39   62.19
  -2   7   1  142.79   52.69
   6   1  -1  773.12   73.39
  -7   6  -1 1058.49  122.39
   6   1  -1  768.42   69.09
   7  -6   1  961.50  109.39
  -1   7   1  901.91   97.99
  -7   7  -1    2.20   68.29
   7   0  -1   55.79   52.89
   0   7   1   -2.90   49.99
   7  -7   1  -32.00   52.79
   8  -1  -1  -20.70   43.30
  -7   8  -1 -114.09   64.69
   7  -8   1  -51.89   53.19
   1   7   1   56.69   47.60
   9  -2  -1  166.78   70.29
  -7   9  -1  205.18  100.39
   2   7   1   96.49   53.79
   7  -9   1   68.59   74.79
  10  -3  -1   48.80   62.59
  -7  10  -1   -9.10   91.19
   3   7   1   -6.90   73.39
   3   7   1  -39.50   47.50
  -7  11  -1   47.50  103.59
  11  -4  -1   53.99   81.49
   4   7   1   61.59   91.89
   4   7   1   57.99   45.00
  11  -8  -1  -46.60   74.19
  -3  11  -1  -46.70   82.79
   8   3   1   32.20   32.10
  10  -8  -1  106.99   89.49
  -2  10  -1  254.37  102.59
   8   2   1  177.08   44.50
   9  -8  -1  147.29   89.19
  -1   9  -1  287.97   91.69
  -9   8   1  279.57  103.99
   8   1   1  175.28   57.79
   0   8  -1  555.94   97.59
   8  -8  -1  457.65  104.59
  -8   8   1  361.36  104.09
   8   0   1  429.76   77.69
   7  -8  -1  -83.99   60.09
   1   7  -1   48.50   53.19
   8  -1   1   86.09   54.39
  -7   8   1   33.10   73.79
   2   6  -1  597.04   74.49
   6  -8  -1 1003.80  123.29
  -6   8   1  588.34  114.29
   8  -2   1  624.94   96.79
   3   5  -1   55.69   29.70
   3   5  -1  112.69   69.09
   3   5  -1   88.49   31.80
   5  -8  -1  110.09   62.79
   8  -3   1   67.49   55.79
  -5   8   1   39.30   61.39
   4  -8  -1  375.36   79.79
   4   4  -1  299.67   88.59
   8  -4   1  283.67   74.39
  -4   8   1  187.38   74.19
   5   3  -1  318.67   84.59
  -8   5  -1  256.87   74.59
   8  -5   1   42.00   57.69
  -3   8   1  178.58   74.79
   6   2  -1  235.88   41.60
   6   2  -1  315.47   83.99
  -8   6  -1  339.37   88.59
   6   2  -1  195.48   39.40
  -2   8   1  423.56   88.09
   8  -6   1  301.47   84.49
  -8   7  -1  -74.29   68.69
   7   1  -1 -113.19   40.20
  -1   8   1  -89.39   53.89
   8  -7   1   48.30   68.09
   8   0  -1  366.26   75.89
  -8   8  -1  559.84  130.19
   0   8   1  590.24   98.09
   8  -8   1  486.95  101.29
   9  -1  -1  -46.20   48.00
  -8   9  -1   18.30   89.09
   1   8   1   55.29   60.39
   8  -9   1 -160.68   60.89
  -8  10  -1   -3.10  100.79
  10  -2  -1  193.28   83.99
   2   8   1  156.28   68.29
  11  -3  -1  155.98   88.39
  -8  11  -1  141.89  119.39
   3   8   1  117.59   61.79
   3   8   1  199.38  104.89
  -1  10  -1  124.89   89.49
  10  -9  -1  -41.90   66.19
   9   1   1  -29.40   42.50
   9  -9  -1   60.49   80.49
   0   9  -1   25.20   70.89
  -9   9   1   67.79   87.69
   9   0   1    5.10   50.99
   8  -9  -1  133.99   81.19
   1   8  -1   77.09   61.19
  -8   9   1   34.60   81.29
   9  -1   1   -1.00   56.59
   2   7  -1   12.30   47.70
   7  -9  -1  -34.90   59.09
  -7   9   1  -75.19   75.49
   9  -2   1   78.09   59.09
   3   6  -1  114.89   76.29
   3   6  -1  350.86   55.19
   9  -3   1  276.07   79.59
  -6   9   1  285.97   96.79
   4   5  -1  -25.20   17.90
   4   5  -1   -7.90   21.50
   4   5  -1   59.89   68.59
   9  -4   1  -21.80   52.29
  -5   9   1   40.10   76.89
   5   4  -1   42.80   67.59
  -4   9   1   21.20   70.59
   9  -5   1  -31.10   58.09
   6   3  -1  218.08   35.70
   6   3  -1  334.87   95.49
  -3   9   1  288.27   87.39
   9  -6   1  196.48   76.29
   7   2  -1  -10.00   32.60
   9  -7   1   78.79   69.69
  -2   9   1  -31.90   58.89
  -9   8  -1  132.19   89.59
   8   1  -1  186.98   59.99
   9  -8   1  161.48   83.89
  -1   9   1  239.18   91.89
  -9   9  -1  149.99   88.89
   9   0  -1   29.70   59.59
   0   9   1   54.79   73.49
   9  -9   1  153.48   98.89
  -9  10  -1  165.18  109.99
  10  -1  -1  132.69   70.39
   9 -10   1   60.99   95.09
   1   9   1   26.70   68.49
   9 -10  -1   -3.20   75.49
   1   9  -1    8.00   68.19
  -9  10   1 -105.29   87.69
  10  -1   1  -18.90   58.19
   2   8  -1 -107.59   49.00
  -8  10   1   25.80   95.59
  10  -2   1  -14.00   65.39
   3   7  -1  100.39   49.20
   3   7  -1   82.99   82.99
  -7  10   1  215.58  112.69
  10  -3   1   30.00   67.49
   4   6  -1   72.99   28.90
   4   6  -1   29.30   69.29
  10  -4   1  125.59   73.69
  -6  10   1  164.88  108.39
   5   5  -1  174.28   88.69
  10  -5   1   38.80   64.89
  -5  10   1   96.59   94.29
   6   4  -1  154.58   88.89
  -4  10   1  167.78   97.99
  10  -6   1   71.99   77.19
   7   3  -1   95.59   85.89
   7   3  -1   25.50   26.80
  10  -7   1   56.09   71.89
  -3  10   1   39.80   75.49
   8   2  -1  -37.30   37.20
  -2  10   1  -73.89   74.89
  10  -8   1   91.89   84.69
   9   1  -1  -26.60   51.29
  -1  10   1    6.60   74.79
  10  -9   1  -15.60   83.89
   3   8  -1  329.17  122.39
   3   8  -1   10.00   49.00
  11  -3   1   83.29   82.89
  -8  11   1  110.39  113.39
   4   7  -1   -0.70   32.20
   4   7  -1   11.30   81.79
  11  -4   1  -44.60   71.79
  -7  11   1  -28.50   89.09
   5   6  -1   56.89   83.79
  -6  11   1   59.09  106.79
  11  -5   1  255.27   94.19
   6   5  -1    1.30   86.19
  11  -6   1    2.60   76.89
  -5  11   1  197.88  111.79
   7   4  -1   82.89   89.79
  11  -7   1  102.29   87.39
  -4  11   1  -80.59   91.29
  -3  11   1  -41.20   88.39
  11  -8   1   23.50   79.09
   0   0  -2 9797.42  152.58
   0   0  -2 9841.92  152.88
   0   0   2 9999.00  153.98
   0   0   2 9725.23  152.28
   0   1  -2   27.70   16.90
  -1   0  -2   46.20   16.90
   1  -1  -2   18.70   20.30
   1  -1  -2   18.90   18.80
   0   1  -2   32.80   16.00
  -1   1   2   48.30   20.50
   1   0   2   32.20   15.20
  -1   1   2    9.60   19.10
   1   0   2   24.30   19.40
   1   0   2   36.00   17.00
   0  -1   2   35.80   15.10
   1   0  -2 1046.10   38.30
  -1   1  -2  974.30   46.80
   0  -1  -2  949.40   40.80
  -1   1  -2  945.71   47.60
   0   1   2  973.40   38.80
   1  -1   2  987.00   46.10
   1  -1   2  932.51   45.90
   0   1   2  857.91   39.20
  -1   0   2  929.41   37.30
  -1   2  -2 5362.46  123.89
   2  -1  -2 5473.65  123.59
   2  -1  -2 5305.57  120.39
  -1   2  -2 5264.37  125.29
  -1  -1  -2 5031.90   92.39
  -2   1   2 5375.96  121.09
   1   1   2 4981.40   96.89
   1   1   2 5187.28   97.29
   1  -2   2 5230.58  120.69
  -1   3  -2 7611.34  170.48
   3  -2  -2 7425.76  178.28
  -1   3  -2 7101.49  169.38
   1  -3   2 7592.54  163.88
  -3   2   2 7540.85  177.08
   2   1   2 7268.57  129.79
   2   1   2 7360.06  164.18
   2   1   2 7516.75  127.69
   2  -2  -2  665.93   60.79
   0   2  -2  654.33   45.50
  -2   0  -2  775.02   39.40
   0  -2   2  709.93   39.90
   2   0   2  727.03   43.60
   2   0   2  755.42   43.00
  -2   2   2  689.73   57.79
   1  -2  -2  666.33   53.09
   1   1  -2  592.94   52.39
   1   1  -2  623.64   29.30
  -2   1  -2  626.24   48.70
   1   1  -2  646.64   31.30
  -1   2   2  675.43   50.49
   2  -1   2  666.83   49.00
  -1   2   2  730.33   51.49
   2  -1   2  799.82   52.59
  -1  -1   2  650.73   28.20
   2  -1   2  700.73   47.00
   0  -2  -2  176.78   28.90
  -2   2  -2  160.68   35.30
   2   0  -2  109.59   23.80
   0   2   2  160.18   28.70
   2  -2   2  139.89   35.20
  -2   0   2  122.29   24.40
  -2   3  -2 2580.24  107.29
   3  -1  -2 2607.64   91.29
  -1  -2  -2 2488.25   61.19
   3  -1  -2 2588.74   92.59
   1   2   2 2644.44   70.79
   2  -3   2 2481.15   99.29
  -3   1   2 2616.44   87.89
   1   2   2 2722.93   66.49
  -2   4  -2  127.69   41.60
   4  -2  -2  173.48   43.30
   2   2   2  165.68   23.00
   2   2   2  148.29   22.10
  -4   2   2  201.58   43.00
   2  -4   2  124.89   38.20
   5  -3  -2 1580.74  102.89
  -2   5  -2 1800.42  106.19
   3   2   2 1629.84   51.39
   3   2   2 1654.13   54.59
   3   2   2 1695.73  100.29
   2  -5   2 1631.14   94.19
  -5   3   2 1779.12  103.19
  -1   4  -2 1763.52   83.89
   4  -3  -2 1681.03   95.99
  -1   4  -2 1610.84   87.99
  -4   3   2 1670.83   94.69
   3   1   2 1696.73   85.59
   3   1   2 1636.74   54.59
   1  -4   2 1605.24   76.99
   3   1   2 1462.55   56.69
   3  -3  -2  -61.29   29.00
   0   3  -2  -14.10   22.70
  -3   0  -2   -7.70   17.70
   0  -3   2   44.10   20.70
  -3   3   2   46.30   36.90
   3   0   2   44.60   25.40
   3   0   2   15.40   17.50
   3   0   2   23.30   23.30
   1   2  -2   82.09   19.40
   1   2  -2   69.29   17.70
   2  -3  -2   67.09   35.00
  -3   1  -2   69.49   28.80
   1   2  -2   -8.70   37.60
   3  -1   2   52.09   27.30
   3  -1   2   41.10   29.10
   3  -1   2   65.69   26.10
  -2   3   2   40.40   33.80
  -3   2  -2    0.70   31.90
   2   1  -2   48.10   15.00
   2   1  -2    7.10   33.20
   1  -3  -2    6.50   26.60
  -1   3   2  -23.50   26.10
  -1   3   2   55.89   30.10
   3  -2   2   39.80   32.50
  -3   3  -2 1382.36   83.19
   3   0  -2 1182.98   57.19
   0  -3  -2 1244.58   57.89
   3   0  -2 1136.79   54.59
   0   3   2 1189.78   60.09
   3  -3   2 1175.28   80.49
  -3   0   2 1189.58   48.20
  -3   4  -2  937.91   83.09
   4  -1  -2  989.30   68.29
   3  -4   2 1141.59   83.49
   1   3   2  944.81   51.29
   1   3   2 1025.30   52.89
  -4   1   2 1004.30   61.19
   5  -2  -2  364.26   62.59
   5  -2  -2  396.66   64.59
  -3   5  -2  209.18   58.79
  -5   2   2  306.47   54.29
   3  -5   2  441.56   67.89
   2   3   2  422.66   32.90
   2   3   2  341.87   35.80
   6  -3  -2  -73.59   32.90
  -3   6  -2    3.50   38.80
   3   3   2    2.80   16.00
  -6   3   2   12.80   39.90
   3   3   2  -22.60   38.70
   3  -6   2  -40.90   29.30
   3   3   2    6.90   15.30
  -3   7  -2  166.68   63.29
   7  -4  -2  207.08   65.59
   4   3   2  150.28   23.00
   3  -7   2  158.28   57.39
   4   3   2  190.58   28.00
  -7   4   2  118.69   52.39
   4   3   2  127.49   56.39
  -2   6  -2  332.77   67.79
   6  -4  -2  495.55   81.69
  -6   4   2  388.56   72.19
   4   2   2  456.55   71.39
   4   2   2  366.76   32.70
   4   2   2  343.87   36.30
   2  -6   2  401.16   62.99
   5  -4  -2  -26.60   38.70
  -1   5  -2   43.50   39.40
  -1   5  -2  -17.00   26.80
   4   1   2  -11.40   16.90
  -5   4   2   31.60   40.90
   1  -5   2    5.60   25.90
   4   1   2   23.70   30.70
   4   1   2   30.10   22.50
   0   4  -2   24.10   26.60
   0   4  -2   55.99   30.90
   4  -4  -2   66.79   45.90
  -4   4   2   64.09   42.40
   4   0   2   39.30   22.60
   0  -4   2   25.30   22.20
   4   0   2   12.70   25.10
   1   3  -2  153.38   26.60
   1   3  -2  165.48   29.50
   3  -4  -2  169.18   47.00
  -4   1  -2  202.18   35.00
   4  -1   2   85.89   29.30
  -3   4   2  134.29   47.90
   4  -1   2  128.09   36.60
   2  -4  -2  166.28   43.70
   2   2  -2  118.39   44.60
  -4   2  -2  154.28   41.10
   2   2  -2  121.99   16.80
   2   2  -2  115.19   19.70
   4  -2   2  224.58   40.60
  -2   4   2   56.29   37.60
   4  -2   2  125.09   39.10
   1  -4  -2  322.27   49.40
   3   1  -2  444.86   33.00
   3   1  -2  427.96   30.50
  -4   3  -2  320.17   56.39
   3   1  -2  404.66   65.19
  -1   4   2  473.55   54.99
   4  -3   2  517.55   65.29
  -1   4   2  429.96   54.99
   4   0  -2  898.21   58.49
   0  -4  -2  823.82   54.89
   4   0  -2  847.72   56.59
  -4   4  -2  841.42   87.69
   4  -4   2  771.72   78.29
   0   4   2  862.71   61.59
   5  -1  -2  315.37   52.89
  -4   5  -2  193.88   61.39
   1   4   2  283.37   41.40
   4  -5   2  278.27   62.79
  -5   1   2  285.97   44.30
   1   4   2  242.48   38.70
   6  -2  -2  279.57   58.49
   6  -2  -2  288.07   59.69
  -4   6  -2  529.25   86.69
   2   4   2  374.76   40.90
   2   4   2  348.67   40.60
   4  -6   2  554.14   78.19
  -6   2   2  388.66   59.99
   7  -3  -2  366.16   76.59
  -4   7  -2  481.35   89.39
   3   4   2  427.76   40.10
   3   4   2  359.76   39.50
   4  -7   2  402.56   78.79
  -7   3   2  345.07   62.89
   8  -4  -2  -27.30   46.30
  -4   8  -2  -47.00   52.69
   4   4   2    2.90   20.30
   4   4   2  -25.70   16.30
   4   4   2 -102.79   39.90
   4  -8   2  -95.79   74.49
   9  -5  -2   41.30   58.39
  -4   9  -2   27.40   77.59
   5   4   2  122.09   73.19
   5   4   2   46.70   22.30
  -3   8  -2  -14.20   56.49
   8  -5  -2   38.30   54.79
   5   3   2   24.60   21.90
  -8   5   2  -13.60   58.89
   5   3   2  165.38   68.09
   5   3   2    4.10   18.20
   7  -5  -2   59.09   52.29
  -2   7  -2  -49.20   37.00
   5   2   2   -7.80   45.50
  -7   5   2  -59.89   41.40
   5   2   2  -15.10   19.80
   2  -7   2  -68.09   38.00
   5   2   2    7.20   19.80
   6  -5  -2  543.85   86.89
  -1   6  -2  676.33   83.39
  -1   6  -2  662.43   74.49
   5   1   2  790.32   52.49
   5   1   2  621.84   79.49
   1  -6   2  665.73   62.99
  -6   5   2  663.83   94.09
   5   1   2  786.12   58.69
   5  -5  -2   57.69   47.40
   0   5  -2   42.80   35.00
   0   5  -2   68.19   34.40
   5   0   2  103.79   36.40
  -5   5   2   27.90   47.30
   5   0   2   72.49   29.10
   1   4  -2  127.79   31.90
   4  -5  -2  144.19   50.39
   1   4  -2  141.99   33.40
  -5   1  -2   69.59   28.30
   5  -1   2  110.39   37.40
  -4   5   2  225.38   56.09
   2   3  -2   42.30   18.70
  -5   2  -2   28.90   31.30
   3  -5  -2  115.09   45.40
   2   3  -2  137.69   53.79
   2   3  -2   99.29   19.90
   5  -2   2   93.49   40.60
  -3   5   2   25.40   43.30
   5  -2   2   58.99   31.50
   3   2  -2    4.20   11.00
  -5   3  -2   20.70   37.30
   3   2  -2  -29.80   34.90
   2  -5  -2   29.90   33.20
   3   2  -2   -0.20   13.90
  -2   5   2   30.80   37.40
   5  -3   2  -26.10   33.80
   5  -3   2   29.30   31.80
   4   1  -2  226.48   32.70
  -5   4  -2  163.78   53.19
   4   1  -2  199.18   32.90
   4   1  -2  215.98   56.09
   1  -5  -2  250.57   45.40
  -1   5   2  250.77   50.59
   5  -4   2  220.18   55.89
  -1   5   2  258.67   50.69
   5   0  -2 1278.47   80.39
  -5   5  -2 1142.39  111.29
   5   0  -2 1433.56   80.29
   0   5   2 1279.17   83.09
   5  -5   2 1294.97  106.09
  -5   6  -2  692.23   97.29
   6  -1  -2  589.84   71.69
   1   5   2  698.83   62.29
   1   5   2  549.35   60.29
   5  -6   2  451.05   84.89
  -5   7  -2   79.89   64.79
   7  -2  -2   57.89   49.90
   2   5   2   79.99   33.10
   5  -7   2   93.49   56.99
   2   5   2   80.79   33.10
   8  -3  -2   -3.00   50.39
  -5   8  -2   60.09   66.59
   3   5   2   16.10   29.10
   5  -8   2   -1.50   55.29
   3   5   2   69.99   32.70
   9  -4  -2  -45.60   49.40
  -5   9  -2  -15.10   67.19
   4   5   2   55.29   63.89
   4   5   2   -5.50   28.50
  10  -5  -2   -8.80   69.79
  -5  10  -2  180.88  101.19
   5   5   2  -48.00   70.39
   5   5   2   20.60   24.40
  11  -6  -2   53.09   83.39
  -5  11  -2 -131.79   89.19
   6   5   2  -85.89   80.59
  -4  10  -2   19.10   90.49
  10  -6  -2  140.69   81.39
   6   4   2   75.79   83.59
   6   4   2   21.80   21.90
   9  -6  -2    1.00   57.69
  -3   9  -2   64.79   64.79
   6   3   2    5.80   25.30
   6   3   2   42.00   72.99
  -2   8  -2   29.30   54.89
   8  -6  -2  -50.19   49.70
   6   2   2   19.30   29.30
  -8   6   2   -5.00   56.09
   6   2   2  -35.70   50.09
  -1   7  -2  875.51   98.29
   7  -6  -2  560.34  103.29
  -7   6   2  907.41  113.79
   6   1   2  667.93   64.19
   6   1   2  704.83   65.89
   6  -6  -2  587.64   89.79
   0   6  -2  703.93   78.89
   0   6  -2  811.52   73.29
  -6   6   2  785.32  102.29
   6   0   2  750.22   66.79
   6   0   2  818.42   73.79
   1   5  -2  -25.80   27.70
   5  -6  -2  -20.80   38.90
   1   5  -2  -10.30   22.70
  -5   6   2  -82.39   39.40
   6  -1   2  -38.70   29.40
  -6   2  -2  560.64   64.79
   2   4  -2  709.93   88.09
   2   4  -2  444.36   45.10
   2   4  -2  538.35   43.00
   4  -6  -2  576.64   76.99
   6  -2   2  597.54   72.49
  -4   6   2  449.06   75.79
   6  -2   2  449.56   65.39
  -6   3  -2  398.46   64.09
   3   3  -2  337.67   23.60
   3   3  -2  363.26   73.19
   3   3  -2  300.57   24.20
   3  -6  -2  303.27   57.89
   6  -3   2  414.56   67.59
   6  -3   2  299.77   47.50
  -3   6   2  304.17   66.29
   4   2  -2   75.99   19.60
   4   2  -2  221.48   59.79
   4   2  -2   91.29   20.90
  -6   4  -2  119.19   50.69
   2  -6  -2   56.09   38.90
   6  -4   2   38.50   35.90
   6  -4   2   37.00   46.30
  -2   6   2  205.98   54.79
  -6   5  -2  181.48   63.49
   5   1  -2  167.48   37.40
   1  -6  -2  153.98   41.50
   5   1  -2  177.88   37.80
  -1   6   2  185.48   52.39
  -1   6   2  155.58   52.09
   6  -5   2  124.99   60.59
   6   0  -2  199.68   49.70
  -6   6  -2  407.06   88.99
   6   0  -2  211.88   50.99
   0   6   2  179.98   52.29
   6  -6   2  329.87   80.99
  -6   7  -2  -90.89   54.59
   7  -1  -2  -53.99   40.80
   6  -7   2    0.90   50.59
   1   6   2  -19.00   33.30
  -6   8  -2   47.70   75.59
   8  -2  -2   39.30   55.59
   6  -8   2  -95.29   47.40
   2   6   2  -15.20   33.40
   9  -3  -2   38.00   58.79
  -6   9  -2  -80.89   71.19
   3   6   2   -1.40   38.90
  -6  10  -2   17.30   91.19
  10  -4  -2   37.20   69.29
   4   6   2   -3.50   34.00
   4   6   2  128.99   89.69
  -6  11  -2  153.28  124.09
  11  -5  -2   87.49   77.39
   5   6   2  130.99   95.09
   5   6   2   73.89   55.49
  -4  11  -2  -26.10   93.79
  11  -7  -2  201.78   93.89
   7   4   2 -134.79   71.89
  -3  10  -2   62.39   79.79
  10  -7  -2   17.60   72.19
   7   3   2   39.70   28.80
   7   3   2   61.19   87.69
  -2   9  -2  -86.19   51.59
   9  -7  -2  -90.29   54.39
   7   2   2  -25.40   31.00
   7   2   2   -9.30   69.39
  -1   8  -2  154.78   72.89
   8  -7  -2   24.80   67.19
   7   1   2    7.40   36.20
  -8   7   2 -112.89   65.39
   7  -7  -2   58.79   60.29
   0   7  -2   10.50   49.10
  -7   7   2   56.19   67.99
   7   0   2   29.30   41.10
   6  -7  -2   21.60   53.79
   1   6  -2   29.10   42.20
  -6   7   2  181.38   74.89
   7  -1   2  144.39   54.29
   2   5  -2  180.58   35.90
   2   5  -2   90.89   64.59
   2   5  -2  252.07   43.20
   5  -7  -2  101.79   58.39
  -5   7   2  342.47   77.49
   7  -2   2   89.99   51.09
   3   4  -2   68.79   54.19
   3   4  -2   36.20   20.30
  -7   3  -2  100.39   48.10
   3   4  -2   29.60   18.00
   4  -7  -2  179.18   57.79
  -4   7   2  134.99   57.89
   7  -3   2   67.69   45.80
   4   3  -2   67.99   15.40
  -7   4  -2    8.20   40.80
   4   3  -2   53.09   15.90
   3  -7  -2    5.60   41.10
   4   3  -2  146.39   60.79
   7  -4   2   91.09   50.89
   7  -4   2   47.10   30.60
  -3   7   2   42.20   47.50
   5   2  -2  -19.00   19.10
   5   2  -2   -2.20   19.90
   5   2  -2   18.50   49.90
  -7   5  -2  -56.29   43.60
   2  -7  -2   31.10   40.90
  -2   7   2   25.40   47.20
   7  -5   2  -45.50   41.80
   6   1  -2  -15.50   31.70
   6   1  -2   31.20   36.20
  -7   6  -2   39.60   59.49
  -1   7   2    6.20   46.40
   7  -6   2   94.69   53.99
  -7   7  -2  403.16   96.39
   7   0  -2  214.38   61.69
   0   7   2  324.77   69.69
   7  -7   2  295.97   86.59
   8  -1  -2  104.79   56.89
  -7   8  -2   -4.70   78.29
   7  -8   2  134.29   73.89
   1   7   2  115.99   55.09
   9  -2  -2  119.79   64.39
  -7   9  -2   45.20   89.19
   2   7   2   30.40   49.40
   7  -9   2  142.39   83.39
  10  -3  -2   19.70   62.89
  -7  10  -2   29.70   99.39
   3   7   2    3.30   74.39
   3   7   2   67.99   49.20
  -7  11  -2  148.59  114.69
  11  -4  -2  155.48   89.79
   4   7   2   71.29   43.50
   4   7   2  190.28   97.19
  11  -8  -2  237.88  107.99
  -3  11  -2   48.40  101.39
   8   3   2   75.19   37.90
  -2  10  -2   70.39   86.69
  10  -8  -2   43.70   73.09
   8   2   2  -25.10   37.00
   9  -8  -2   77.29   77.99
  -1   9  -2  -21.90   66.29
  -9   8   2  180.68  114.09
   8   1   2   63.79   46.60
   8  -8  -2   54.89   68.89
   0   8  -2   81.19   67.19
   8   0   2  105.49   55.29
  -8   8   2  136.29   87.69
   7  -8  -2    2.60   59.89
   1   7  -2   57.89   49.70
   8  -1   2  -33.80   47.30
  -7   8   2   62.09   74.19
   6  -8  -2  430.96   87.49
   2   6  -2  692.33  125.09
   2   6  -2  484.35   67.89
  -6   8   2  580.04  115.39
   8  -2   2  456.75   87.49
   3   5  -2  327.97   44.50
   5  -8  -2  329.37   82.79
   3   5  -2  314.07   42.50
   3   5  -2  377.16   89.19
  -5   8   2  308.17   86.69
   8  -3   2  175.68   63.79
   4   4  -2   77.09   20.10
   4   4  -2   76.29   17.40
   4   4  -2  133.59   71.09
   4  -8  -2   70.79   62.19
  -4   8   2   89.09   63.19
   8  -4   2  114.69   59.49
  -8   5  -2  255.47   72.79
   5   3  -2  151.48   26.80
   5   3  -2  237.48   27.40
   5   3  -2  239.58   78.79
   8  -5   2  187.98   48.80
   8  -5   2  303.77   78.09
  -3   8   2  194.28   70.89
   6   2  -2  305.87   88.09
  -8   6  -2  288.47   82.09
   6   2  -2  216.18   45.10
   6   2  -2  155.18   42.20
  -2   8   2  281.17   76.49
   8  -6   2  193.08   74.99
  -8   7  -2  232.48   89.59
   7   1  -2  154.08   53.39
   8  -7   2  170.48   78.29
  -1   8   2  113.89   66.19
  -8   8  -2  -21.60   77.59
   8   0  -2  -62.19   49.30
   0   8   2    7.50   54.99
   8  -8   2  -71.09   55.79
  -8   9  -2  148.89   95.69
   9  -1  -2  -34.80   49.50
   8  -9   2  -67.59   70.79
   1   8   2   20.10   52.39
  10  -2  -2   -3.20   64.39
  -8  10  -2    7.50   98.69
   2   8   2   35.10   55.09
  -8  11  -2   16.00   97.09
  11  -3  -2  107.49   84.79
   3   8   2  101.89  100.69
   3   8   2  103.59   61.99
  10  -9  -2   45.00   84.69
  -1  10  -2   39.10   82.29
   9   1   2   82.69   48.80
   9  -9  -2  -41.30   72.29
   0   9  -2    6.60   67.09
   9   0   2   -3.40   48.10
  -9   9   2   40.40   86.19
   1   8  -2    9.20   56.59
   8  -9  -2   71.49   77.39
  -8   9   2   99.79   96.59
   9  -1   2  -25.40   52.59
   7  -9  -2  212.28   82.19
   2   7  -2  -11.80   45.10
   2   7  -2  221.58   92.29
   9  -2   2   49.99   62.49
  -7   9   2   66.29   85.19
   3   6  -2  -54.89   52.89
   3   6  -2   13.00   30.60
   9  -3   2  -36.30   56.89
  -6   9   2 -168.68   67.29
   4   5  -2  316.47   92.39
   4   5  -2  338.37   44.10
   4   5  -2  320.17   33.60
   9  -4   2  227.58   80.49
  -5   9   2  406.26  104.29
   5   4  -2  675.33  121.49
   9  -5   2  286.27   90.69
  -4   9   2  341.17   98.09
   6   3  -2   21.50   67.89
   6   3  -2   18.30   24.30
   9  -6   2  -36.20   58.69
  -3   9   2  103.69   66.99
   7   2  -2  112.19   41.80
  -2   9   2   34.20   60.69
   9  -7   2  113.59   76.59
  -9   8  -2  285.47  103.49
   8   1  -2   29.30   46.40
   9  -8   2  129.19   84.19
  -1   9   2   58.59   65.59
  -9   9  -2  -45.50   83.49
   9   0  -2  -62.19   51.09
   9  -9   2  -67.59   75.59
   0   9   2   42.30   58.29
  10  -1  -2  337.97   85.19
  -9  10  -2  284.97  114.49
   1   9   2  134.49   73.99
   9 -10   2  176.98  101.69
   9 -10  -2  -93.49   67.19
   1   9  -2   35.90   68.19
  10  -1   2   -8.10   57.09
  -9  10   2  -84.79   88.79
   2   8  -2   43.30   54.39
   2   8  -2   -6.90   86.49
  10  -2   2 -120.19   56.99
  -8  10   2  -55.29   87.99
   3   7  -2   -3.50   72.49
   3   7  -2   90.09   42.80
  10  -3   2   62.39   70.59
  -7  10   2   61.49   96.69
   4   6  -2   52.59   28.90
   4   6  -2   20.80   76.79
  10  -4   2  -26.10   64.49
  -6  10   2 -132.99   81.49
   5   5  -2  -38.20   57.09
  -5  10   2  -37.90   84.49
  10  -5   2   -5.00   65.39
   6   4  -2   59.89   75.29
  10  -6   2  121.49   83.29
  -4  10   2  -58.29   77.99
   7   3  -2  -12.50   75.49
   7   3  -2    1.10   26.40
  -3  10   2  -20.20   71.39
  10  -7   2  -18.00   71.29
   8   2  -2   59.09   43.60
  -2  10   2   42.90   81.29
  10  -8   2   83.69   85.89
   9   1  -2   24.50   51.99
  10  -9   2  -49.10   83.49
  -1  10   2  -43.10   74.39
   3   8  -2  -19.70   78.29
   3   8  -2   23.30   48.00
  -8  11   2   63.29  106.89
  11  -3   2  112.29   84.59
   4   7  -2   52.19   82.99
   4   7  -2  -46.10   30.70
  11  -4   2   28.90   77.39
  -7  11   2  109.79  117.89
   5   6  -2  227.08   97.59
  11  -5   2  114.19   79.19
  -6  11   2  146.29  111.79
   6   5  -2   59.29   84.29
  11  -6   2  197.38   97.79
  -5  11   2  240.78  114.39
   7   4  -2   22.00   84.89
  -4  11   2   21.90   95.89
  11  -7   2  -45.40   79.39
   8   3  -2  -23.20   44.30
  11  -8   2  129.69   90.29
  -3  11   2  -47.50   84.49
   0   0  -3 4337.47   94.39
   0   0   3 4327.27   94.19
  -1   0  -3   34.80   19.90
   0   1  -3   33.30   18.30
   1  -1  -3   23.10   25.00
   0   1  -3   26.60   23.80
   0   1  -3   13.40   20.30
   1   0   3   41.90   19.20
   0  -1   3   48.50   20.00
   1   0   3   32.70   20.70
   1   0   3    5.80   26.10
  -1   1   3  -12.00   21.20
  -1   1   3  -11.80   18.70
   1   0  -3  410.56   36.80
  -1   1  -3  367.76   43.10
   0  -1  -3  418.46   38.90
   1   0  -3  380.56   33.40
  -1   0   3  376.76   36.20
   0   1   3  421.06   38.20
   0   1   3  385.46   35.70
   1  -1   3  350.96   40.80
   2  -1  -3  815.42   53.19
  -1   2  -3  796.42   56.79
  -1  -1  -3  657.53   41.20
  -1   2  -3  740.23   55.99
   2  -1  -3  783.02   54.69
  -2   1   3  728.03   36.40
   1   1   3  703.43   42.10
   1  -2   3  712.43   52.49
  -2   1   3  725.53   52.49
  -1   3  -3  246.38   42.00
  -1   3  -3  240.08   41.70
   3  -2  -3  244.78   46.30
  -2  -1  -3  207.68   28.60
   1  -3   3  198.68   37.30
   2   1   3  202.08   30.20
  -3   2   3  186.78   42.60
   2   1   3  252.77   30.50
   2  -2  -3  269.17   45.10
   0   2  -3  255.07   38.50
   0   2  -3  265.47   50.69
  -2   0  -3  252.27   35.50
   0  -2   3  238.38   34.60
  -2   2   3  261.87   42.80
   2   0   3  266.17   38.40
   2   0   3  238.58   29.60
   2   0   3  256.07   45.50
   1  -2  -3  680.03   55.19
  -2   1  -3  665.73   52.49
   1   1  -3  610.14   39.00
   1   1  -3  754.32   56.49
   2  -1   3  665.03   52.19
  -1  -1   3  602.54   36.50
   2  -1   3  639.74   55.09
   2  -1   3  605.44   49.60
  -2   2  -3   32.70   32.80
   2   0  -3   76.49   24.80
   0  -2  -3   97.49   27.40
   2  -2   3   91.09   33.70
  -2   0   3   42.80   23.40
   0   2   3   98.09   27.40
   0   2   3  103.99   26.90
  -1  -2  -3 5477.65  112.39
   3  -1  -3 5486.95  143.39
  -2   3  -3 5372.36  154.98
   3  -1  -3 5585.24  137.99
  -3   1   3 5462.35  135.59
   2  -3   3 5674.43  153.98
   1   2   3 5632.34  118.49
   1   2   3 5555.04  120.19
  -2   4  -3  131.29   45.70
   4  -2  -3   81.99   40.60
   2   2   3   67.99   21.70
   2   2   3  140.89   25.00
   2  -4   3  119.89   37.40
  -4   2   3   82.29   35.90
  -2   5  -3  334.97   65.09
   5  -3  -3  274.67   57.79
  -5   3   3  308.77   56.29
   3   2   3  403.16   61.49
   3   2   3  265.27   32.20
   3   2   3  302.97   35.20
   2  -5   3  325.07   54.29
  -1   4  -3 1017.20   71.09
  -1   4  -3  828.52   69.19
   4  -3  -3  969.20   81.99
   3   1   3  873.81   51.49
   1  -4   3  819.62   61.29
   3   1   3  874.61   65.89
  -4   3   3  744.53   74.39
   3   1   3  850.51   44.80
   3  -3  -3  394.86   59.79
  -3   0  -3  368.66   36.90
   0   3  -3  383.66   46.40
   3   0   3  349.37   41.10
  -3   3   3  335.87   55.29
   0  -3   3  421.16   39.50
   3   0   3  381.86   42.90
   2  -3  -3 4683.33  140.89
   1   2  -3 4825.02  148.49
   1   2  -3 4915.11  103.69
   1   2  -3 4659.93  104.99
  -3   1  -3 4782.22  125.19
  -2   3   3 4849.31  142.09
   3  -1   3 4830.02  133.59
   3  -1   3 4652.43  126.99
   3  -1   3 4783.12  131.09
  -1  -2   3 4667.93   89.89
  -3   2  -3 1392.06   79.29
   2   1  -3 1326.37   49.60
   2   1  -3 1215.08   77.69
   1  -3  -3 1191.38   70.79
   2   1  -3 1337.97   50.79
  -1   3   3 1300.57   69.69
  -1   3   3 1272.87   73.59
   3  -2   3 1234.98   77.09
   0  -3  -3 2226.38   79.29
   3   0  -3 2317.87   80.89
  -3   3  -3 2198.08  104.69
   3   0  -3 2241.88   77.39
   0   3   3 2191.28   83.09
   3  -3   3 2266.67  104.29
  -3   0   3 2334.37   73.09
   4  -1  -3   12.30   28.40
  -3   4  -3    9.20   39.30
   4  -1  -3  -16.00   27.40
   3  -4   3   52.69   36.70
  -4   1   3   39.20   26.40
   1   3   3   61.39   25.50
   1   3   3   42.60   25.30
  -3   5  -3  456.55   73.39
   5  -2  -3  553.54   71.99
   3  -5   3  484.15   68.89
   2   3   3  571.64   42.40
   2   3   3  554.54   43.10
  -5   2   3  578.84   65.39
  -3   6  -3  551.94   82.89
   6  -3  -3  752.22   86.29
   3   3   3  770.72   46.20
   3   3   3  764.72   45.40
  -6   3   3  825.42   82.09
   3  -6   3  777.52   81.39
   7  -4  -3   91.69   54.59
  -3   7  -3   64.89   56.89
   4   3   3  137.29   27.10
   3  -7   3   58.69   49.40
  -7   4   3  134.89   54.69
   4   3   3  104.69   27.60
   4   3   3  124.29   55.69
   6  -4  -3  855.71   92.19
  -2   6  -3  627.74   83.99
   4   2   3  868.41   52.79
   2  -6   3  657.53   72.79
  -6   4   3  684.73   86.19
   4   2   3  808.42   47.10
   4   2   3  974.10   87.09
   5  -4  -3 1371.66  101.19
  -1   5  -3 1389.46   91.59
  -1   5  -3 1645.34   91.69
   4   1   3 1355.36   85.59
  -5   4   3 1235.78   95.79
   4   1   3 1416.06   64.29
   4   1   3 1465.65   67.99
   1  -5   3 1298.87   76.09
  -4   0  -3   59.29   21.90
   4  -4  -3    1.40   37.60
   0   4  -3   23.20   29.70
   0  -4   3   53.79   22.90
   4   0   3    0.20   19.30
   4   0   3   51.49   29.70
  -4   4   3   60.49   41.30
   4   0   3   76.89   30.10
  -4   1  -3   46.50   27.60
   3  -4  -3    5.70   36.00
   1   3  -3   36.30   20.10
   1   3  -3  -19.60   19.10
   4  -1   3   57.29   32.10
  -3   4   3   35.10   38.10
   4  -1   3  -18.80   22.50
   4  -1   3  -12.90   25.90
   2  -4  -3  220.28   45.90
   2   2  -3  225.58   52.59
   2   2  -3  231.18   26.50
  -4   2  -3  340.27   55.09
   2   2  -3  274.67   29.40
  -2   4   3  234.78   50.19
   4  -2   3  194.68   45.70
   4  -2   3  292.37   47.10
   3   1  -3   31.70   21.30
   3   1  -3   72.99   42.50
   1  -4  -3   32.50   31.00
   3   1  -3   70.99   23.10
  -4   3  -3   31.70   36.20
   4  -3   3   49.60   39.40
  -1   4   3   48.30   31.10
  -1   4   3  -29.90   27.10
   4   0  -3  268.27   42.70
   4   0  -3  247.08   41.50
   0  -4  -3  256.47   42.90
  -4   4  -3  191.08   56.29
   0   4   3  278.57   45.90
   4  -4   3  338.37   62.19
  -4   5  -3  527.55   82.19
   5  -1  -3  533.95   61.69
   4  -5   3  471.05   76.19
   1   4   3  592.44   51.49
  -5   1   3  450.85   50.09
   1   4   3  506.45   50.99
   6  -2  -3  -13.20   33.40
  -4   6  -3   97.19   58.29
   6  -2  -3   35.00   39.40
   2   4   3    3.60   22.70
  -6   2   3   -0.50   27.20
   4  -6   3   -0.80   39.90
   2   4   3   -8.30   21.80
   7  -3  -3  184.88   60.59
  -4   7  -3  121.99   63.69
  -7   3   3  125.49   49.10
   4  -7   3  149.09   60.39
   3   4   3  145.99   31.50
   3   4   3  113.59   31.80
   8  -4  -3   15.40   49.10
  -4   8  -3   23.90   58.29
   4   4   3   32.70   22.00
   4   4   3   35.80   26.90
   4   4   3   38.60   59.19
   9  -5  -3  169.28   73.69
  -4   9  -3  124.19   82.29
   5   4   3  170.68   36.10
   5   4   3  160.28   83.09
  -3   8  -3   19.50   56.49
   8  -5  -3  -60.49   50.89
   5   3   3  -14.20   23.40
   5   3   3   16.20   48.00
   5   3   3    4.10   22.40
   7  -5  -3   32.10   47.30
  -2   7  -3   59.69   55.79
   5   2   3   72.59   26.20
  -7   5   3   38.70   49.40
   5   2   3   52.99   28.10
   5   2   3   65.49   53.09
  -1   6  -3    1.20   35.00
  -1   6  -3  -61.09   31.20
   6  -5  -3   62.59   51.59
  -6   5   3   77.59   47.70
   5   1   3   68.79   42.00
   5   1   3   46.00   24.60
   5   1   3  -13.80   22.60
   1  -6   3  -25.80   21.90
   5  -5  -3  210.98   58.59
   0   5  -3  205.38   50.89
   5   0   3  129.99   31.40
   5   0   3  107.19   38.20
  -5   5   3  132.79   52.29
   1   4  -3  328.77   42.80
  -5   1  -3  310.07   45.10
   4  -5  -3  307.27   63.99
   1   4  -3  362.46   45.70
   5  -1   3  369.36   50.99
   5  -1   3  346.67   58.39
  -4   5   3  317.07   66.89
   2   3  -3  223.68   30.90
   2   3  -3  191.28   53.89
  -5   2  -3  224.28   46.50
   2   3  -3  206.18   31.70
   3  -5  -3  242.88   53.59
  -3   5   3  276.47   56.39
   5  -2   3  233.18   52.69
   5  -2   3  214.68   43.40
   3   2  -3    0.80   16.10
   3   2  -3   46.10   17.40
   3   2  -3   82.29   49.20
   2  -5  -3   46.70   35.00
  -5   3  -3   46.10   41.60
  -2   5   3  136.89   46.50
   5  -3   3   -0.30   33.60
   5  -3   3   76.49   44.00
   4   1  -3  130.89   30.10
  -5   4  -3  202.08   54.09
   4   1  -3   88.79   49.99
   4   1  -3  154.38   30.50
   1  -5  -3  148.89   39.00
  -1   5   3   86.99   41.80
  -1   5   3  165.38   44.60
   5  -4   3  114.39   49.60
   5   0  -3  -25.40   24.80
  -5   5  -3   11.60   46.50
   0  -5  -3   -1.50   23.20
   5   0  -3   40.40   30.30
   0   5   3  -40.70   25.10
   5  -5   3  -52.19   38.50
   6  -1  -3  339.27   60.59
  -5   6  -3  433.66   80.59
   5  -6   3  565.74   91.79
   1   5   3  440.66   56.19
   1   5   3  437.66   55.39
  -5   7  -3  422.96   87.49
   7  -2  -3  416.06   73.49
   2   5   3  443.66   55.59
   5  -7   3  478.25   83.29
   2   5   3  346.87   51.49
  -5   8  -3  185.08   81.99
   8  -3  -3   23.00   54.49
   5  -8   3   -3.20   56.09
   9  -4  -3  -60.99   50.29
  -5   9  -3   15.20   77.39
   4   5   3   24.90   71.19
  10  -5  -3  -41.60   57.19
  -5  10  -3  134.09   94.39
   5   5   3   -1.50   75.49
  11  -6  -3   66.39   81.49
  -5  11  -3   11.60   90.59
   6   5   3  -68.69   77.89
   6   5   3   27.60   40.00
  -4  10  -3  120.49   99.19
  10  -6  -3  201.28   79.39
   6   4   3  173.78   35.70
   6   4   3  174.58   95.39
  -3   9  -3   27.50   66.69
   9  -6  -3  100.59   63.89
   6   3   3   41.30   32.40
   6   3   3   19.30   66.29
  -2   8  -3   11.50   53.39
   8  -6  -3   50.89   60.89
   6   2   3    8.60   30.80
   6   2   3   28.40   50.49
  -8   6   3  -97.99   52.29
   7  -6  -3   -9.70   52.89
  -1   7  -3   40.60   52.49
   6   1   3   56.39   48.10
   6   1   3   70.79   36.30
  -7   6   3   17.00   60.09
   0   6  -3 1099.89   94.19
   6  -6  -3  974.90  106.19
   0   6  -3  984.90   96.19
   6   0   3  888.01   80.39
   6   0   3 1072.89   76.29
  -6   6   3 1129.69  108.49
   5  -6  -3   28.70   45.50
  -6   1  -3   49.99   33.00
   1   5  -3    7.50   26.90
   1   5  -3   19.90   31.00
   6  -1   3   66.09   40.80
  -5   6   3   33.40   47.20
   2   4  -3  301.67   68.39
   2   4  -3  214.68   34.90
   2   4  -3  172.58   32.70
   4  -6  -3  227.08   58.69
  -6   2  -3  252.67   49.50
   6  -2   3  301.97   60.29
  -4   6   3  209.38   64.19
   3   3  -3   15.30   15.50
   3   3  -3   10.80   43.40
  -6   3  -3   38.60   38.50
   3  -6  -3   40.10   39.70
  -3   6   3   61.39   46.50
   6  -3   3   -7.00   42.30
   6  -3   3    4.60   28.50
   2  -6  -3  169.08   45.90
  -6   4  -3  214.48   56.49
   4   2  -3  219.48   32.80
   4   2  -3  206.88   30.90
   4   2  -3  156.18   57.79
  -2   6   3  226.18   56.09
   6  -4   3  269.37   66.69
  -6   5  -3   70.09   56.89
   5   1  -3   39.90   29.30
   5   1  -3  147.29   34.70
   1  -6  -3   70.59   35.90
   6  -5   3  141.59   59.19
  -1   6   3   54.19   40.90
  -1   6   3   61.99   40.30
  -6   6  -3  330.57   79.99
   6   0  -3  345.07   56.09
   6   0  -3  391.56   64.29
   6  -6   3  373.76   84.49
   0   6   3  347.77   61.99
   7  -1  -3    6.40   40.80
  -6   7  -3  116.99   70.09
   1   6   3   46.10   38.70
   6  -7   3    7.20   49.00
   8  -2  -3  161.58   63.39
  -6   8  -3  164.58   80.79
   2   6   3  -11.60   38.40
   6  -8   3   11.50   62.79
  -6   9  -3  109.49   87.09
   9  -3  -3   14.00   56.69
   3   6   3    5.10   37.10
  -6  10  -3   79.69   84.49
  10  -4  -3   18.10   59.49
   4   6   3   -3.30   75.79
   4   6   3   65.19   40.80
  -6  11  -3   70.69  102.29
  11  -5  -3  -16.70   65.99
   5   6   3    0.60   36.20
   5   6   3   23.60   81.39
  -4  11  -3  100.39   99.09
  11  -7  -3  -26.50   76.99
   7   4   3   57.99   30.90
   7   4   3   46.00   94.39
  -3  10  -3  -43.40   67.39
  10  -7  -3  -53.59   60.19
   7   3   3   19.80   32.70
   7   3   3   -1.70   77.49
   9  -7  -3  104.79   71.59
  -2   9  -3   -2.90   73.29
   7   2   3  259.87   93.39
   7   2   3  156.78   46.50
   8  -7  -3  128.39   69.19
  -1   8  -3  148.19   69.99
   7   1   3  136.89   44.30
  -8   7   3  143.79   80.29
   0   7  -3   49.20   50.59
   7  -7  -3  179.68   66.19
   7   0   3   62.69   44.30
  -7   7   3   39.80   69.49
   1   6  -3   88.09   42.50
   6  -7  -3  169.98   68.59
   7  -1   3   93.79   51.09
  -6   7   3   48.00   55.29
   2   5  -3  -46.80   54.39
   2   5  -3  -15.20   24.30
   5  -7  -3   73.09   53.89
   2   5  -3    0.70   26.60
   7  -2   3  -22.00   38.00
  -5   7   3   65.19   53.39
   3   4  -3    8.20   18.90
   3   4  -3   15.90   19.70
   3   4  -3   -7.60   45.70
   4  -7  -3   -3.30   37.40
  -7   3  -3  -58.69   29.60
  -4   7   3  -31.20   45.90
   7  -3   3   46.50   32.10
   7  -3   3   42.60   49.10
   3  -7  -3  225.98   58.09
   4   3  -3  224.28   29.20
   4   3  -3  288.67   29.00
   4   3  -3  173.58   64.59
  -7   4  -3  330.07   72.19
  -3   7   3  116.29   59.49
   7  -4   3  335.97   57.29
   7  -4   3  340.17   78.19
   5   2  -3  425.26   90.49
  -7   5  -3  400.46   82.89
   5   2  -3  360.16   43.10
   5   2  -3  383.96   42.50
  -2   7   3  354.86   74.89
   7  -5   3  491.25   91.59
  -7   6  -3  253.97   75.69
   6   1  -3  127.99   41.30
   6   1  -3   87.59   38.10
   7  -6   3   86.99   57.89
  -1   7   3   59.79   49.10
   7   0  -3  114.49   51.29
  -7   7  -3  202.38   91.09
   7  -7   3  225.78   77.99
   0   7   3  122.69   53.09
   8  -1  -3  260.17   66.59
  -7   8  -3   77.49   84.69
   7  -8   3  105.79   79.29
   1   7   3   73.89   51.39
   9  -2  -3  173.98   70.29
  -7   9  -3  -35.20   78.59
   7  -9   3   90.39   73.69
   2   7   3  125.99   55.09
  -7  10  -3   79.09   98.99
  10  -3  -3   53.59   68.99
   3   7   3   62.69   49.90
  -7  11  -3  111.59  108.69
  11  -4  -3  -27.80   66.79
   4   7   3    0.80   47.00
   4   7   3   31.70   82.49
  -2  10  -3  112.69   81.49
  10  -8  -3  190.58   88.49
   8   2   3  137.89   50.19
  -1   9  -3   84.79   69.79
   9  -8  -3  -14.20   63.69
   8   1   3  -25.30   38.20
   0   8  -3  103.29   64.69
   8  -8  -3  -78.79   52.19
  -8   8   3  146.99   85.39
   8   0   3  -64.39   39.40
   1   7  -3   20.50   47.60
   7  -8  -3  145.19   70.19
   8  -1   3   41.90   48.80
  -7   8   3   63.09   77.19
   6  -8  -3   25.20   54.29
   2   6  -3  -34.00   59.19
   2   6  -3  -25.40   32.10
  -6   8   3  -82.59   58.19
   8  -2   3   40.20   54.99
   3   5  -3   88.89   62.49
   3   5  -3   95.79   34.10
   3   5  -3  112.99   33.40
   5  -8  -3   73.79   57.89
  -5   8   3   98.49   68.99
   8  -3   3   17.60   56.29
   4  -8  -3   98.99   76.49
   4   4  -3  177.38   68.69
   4   4  -3  115.99   23.50
   4   4  -3  132.39   25.00
   8  -4   3  213.68   73.39
   8  -4   3   77.89   40.40
  -4   8   3   92.39   61.79
   5   3  -3    6.80   19.10
   5   3  -3  -10.30   57.39
  -8   5  -3    1.60   56.99
   5   3  -3   14.30   21.60
   8  -5   3   49.80   42.90
   8  -5   3  -19.90   50.69
  -3   8   3   36.10   55.69
  -8   6  -3   45.60   65.39
   6   2  -3   18.40   35.60
  -2   8   3  -34.00   47.60
   8  -6   3   87.99   67.09
  -8   7  -3   54.79   71.99
   7   1  -3   -8.20   40.60
   8  -7   3  -25.10   54.89
  -1   8   3   55.49   56.69
  -8   8  -3   61.89   80.19
   8   0  -3  -39.00   49.00
   0   8   3  -23.90   47.70
   8  -8   3  178.18   82.99
   9  -1  -3  104.79   70.59
  -8   9  -3  137.39   92.89
   8  -9   3   27.80   75.69
   1   8   3  117.39   61.89
  10  -2  -3   12.60   64.49
  -8  10  -3    6.20  101.59
   2   8   3   48.30   56.79
  -1  10  -3  -54.79   74.89
  10  -9  -3 -110.39   68.39
   9   1   3   32.50   45.10
   0   9  -3   21.40   63.69
   9  -9  -3   42.00   74.79
   9   0   3  -76.09   45.10
  -9   9   3 -107.39   74.29
   1   8  -3   37.10   53.49
   8  -9  -3    7.20   61.39
   9  -1   3   -4.20   51.49
  -8   9   3  -61.29   77.99
   2   7  -3   13.80   71.89
   2   7  -3   55.49   48.30
   7  -9  -3   21.10   62.69
   9  -2   3  220.98   73.79
  -7   9   3  -23.40   78.79
   3   6  -3  279.77   49.40
   3   6  -3  236.08   95.69
   9  -3   3  188.58   75.99
  -6   9   3  239.18   97.69
   4   5  -3   68.09   25.40
   4   5  -3  -14.90   62.39
  -5   9   3   13.70   71.69
   9  -4   3   30.30   64.09
   5   4  -3  509.55  109.39
   5   4  -3  584.24   39.80
   5   4  -3  527.25   42.40
  -4   9   3  585.74  116.99
   9  -5   3  260.77   88.89
   6   3  -3  287.57   46.00
   6   3  -3  213.38   89.09
  -3   9   3  350.06   91.49
   9  -6   3   93.99   73.29
   7   2  -3   32.80   38.00
  -2   9   3  -23.90   53.69
   9  -7   3  -35.30   70.19
  -9   8  -3   52.79   80.79
   8   1  -3   55.29   50.69
   9  -8   3   11.80   70.89
  -1   9   3  -60.79   47.50
  -9   9  -3  113.29   99.29
   9   0  -3   80.79   54.59
   0   9   3  134.69   70.79
   9  -9   3  -13.90   80.09
  -9  10  -3  288.27  111.09
  10  -1  -3  -35.50   57.59
   1   9   3   78.89   66.39
   9 -10   3  -14.70  104.49
   1   9  -3   74.99   69.69
   9 -10  -3   99.99   95.99
  10  -1   3   12.80   61.69
  -9  10   3   49.20  102.79
   2   8  -3   -5.90   49.50
   2   8  -3   21.90   86.29
  10  -2   3   35.80   69.59
  -8  10   3  -55.69   89.39
   3   7  -3    5.00   68.49
   3   7  -3  -22.50   38.00
  10  -3   3   91.39   69.19
  -7  10   3  -10.80   82.89
   4   6  -3    1.40   28.30
   4   6  -3   81.29   79.29
  -6  10   3   54.89   94.49
  10  -4   3  -34.10   58.99
   5   5  -3  120.19   81.39
  -5  10   3  -50.89   73.59
  10  -5   3  106.79   75.29
   6   4  -3    5.20   81.29
  10  -6   3   70.59   82.29
  -4  10   3  -44.80   67.99
   7   3  -3   10.90   30.40
  -3  10   3  -19.30   66.29
  10  -7   3  103.59   85.29
   8   2  -3   47.40   41.20
  10  -8   3   41.80   79.99
  -2  10   3  120.29   82.19
   9   1  -3   40.60   51.49
  -1  10   3   95.09   74.89
  10  -9   3  -92.09   81.59
   4   7  -3  180.08   93.39
   4   7  -3   33.20   34.20
  11  -4   3  -70.29   63.69
  -7  11   3   92.49  115.59
   5   6  -3  -32.40   76.79
  -6  11   3  -67.69   94.29
  11  -5   3  -60.49   70.39
   6   5  -3  197.28  100.19
  -5  11   3  217.08  111.69
  11  -6   3  171.08   92.39
   7   4  -3  116.49  105.79
  -4  11   3   14.90  105.09
  11  -7   3  -75.09   77.29
   0   0  -4 1168.98   58.99
   0   0   4 1247.98   57.19
   0   1  -4 2700.53   80.99
   0   1  -4 2611.64   82.09
  -1   0  -4 2556.74   81.99
   0   1  -4 2504.15   78.19
   1  -1  -4 2644.34   87.89
   1   0   4 2627.14   81.19
   1   0   4 2560.24   83.59
  -1   1   4 2582.04   87.09
  -1   1   4 2590.64   83.39
   1   0   4 2806.92   99.39
   0  -1   4 2692.03   80.99
  -1   1  -4   16.90   27.50
   0  -1  -4    5.00   25.80
   1   0  -4   57.89   26.30
   1   0  -4   41.60   22.20
  -1   1  -4   46.10   17.60
   0   1   4   14.30   24.10
   0   1   4   35.30   28.40
   1  -1   4   14.20   24.90
   0   1   4   43.90   24.70
  -1   0   4   49.50   26.40
   2  -1  -4  197.78   38.20
  -1   2  -4  190.18   39.40
  -1  -1  -4  199.68   33.70
  -2   1   4  214.98   37.40
   1   1   4  202.78   33.10
  -2   1   4  192.08   30.70
   1   1   4  216.78   33.10
   1  -2   4  162.78   35.90
  -2  -1  -4  823.42   47.60
  -1   3  -4  986.00   69.49
   3  -2  -4  991.00   73.29
   1  -3   4  850.81   61.59
   2   1   4  996.50   54.99
  -3   2   4  979.60   69.79
   0   2  -4    0.70   35.30
  -2   0  -4   40.50   24.90
   2  -2  -4    5.10   29.60
   0   2  -4   21.10   23.10
   0   2  -4    2.40   24.00
   0  -2   4   19.20   23.70
   2   0   4   -8.80   23.00
   2   0   4   24.60   31.90
  -2   2   4    0.00   28.40
   2   0   4   42.60   23.00
   2   0   4   17.70   17.80
   1  -2  -4 1290.87   68.79
   1   1  -4 1336.67   76.29
   1   1  -4 1255.17   58.99
  -2   1  -4 1153.28   65.69
   1   1  -4 1309.97   74.19
   2  -1   4 1355.76   70.69
  -1  -1   4 1291.87   54.29
   2  -1   4 1324.37   76.89
  -1   2   4 1370.16   71.49
   0  -2  -4   25.40   26.30
   2   0  -4   46.00   25.60
   2   0  -4   30.00   24.90
  -2   2  -4   32.70   31.50
  -2   0   4   42.80   22.70
   2  -2   4   40.50   30.50
   0   2   4   82.99   28.60
   0   2   4   52.89   26.20
  -2   3  -4  830.32   69.69
  -1  -2  -4  875.81   50.19
   3  -1  -4  897.01   65.09
  -3   1   4  875.41   60.39
   2  -3   4  846.62   65.69
   1   2   4  906.41   52.99
   4  -2  -4  851.41   72.39
  -2   4  -4  903.01   77.99
  -4   2   4  836.12   67.49
   2  -4   4  804.92   67.99
   2   2   4  827.52   49.50
   2   2   4  729.33   50.99
  -2   5  -4  494.25   72.89
   5  -3  -4  610.64   78.29
  -5   3   4  556.84   69.89
   3   2   4  593.74   47.90
   2  -5   4  622.64   65.39
   3   2   4  589.64   43.50
   4  -3  -4   98.59   44.10
  -1   4  -4   99.69   39.00
  -1   4  -4   82.29   33.50
   3   1   4   77.99   28.40
   3   1   4   90.29   24.80
   1  -4   4   89.99   31.50
  -4   3   4   93.89   42.20
   3   1   4  148.49   36.10
  -3   0  -4 1034.60   55.39
   0   3  -4 1031.80   63.99
   3  -3  -4 1028.40   80.19
   0  -3   4  953.10   55.59
  -3   3   4 1102.09   79.89
   3   0   4 1016.00   75.69
   3   0   4  983.10   52.59
   3   0   4  965.20   61.39
   1   2  -4  570.24   62.09
  -3   1  -4  407.96   50.19
   1   2  -4  410.46   58.49
   2  -3  -4  434.06   58.89
   1   2  -4  360.96   41.10
   3  -1   4  322.37   49.70
   3  -1   4  435.86   50.49
  -2   3   4  375.66   56.89
  -1  -2   4  326.67   32.90
   3  -1   4  405.16   56.09
   1  -3  -4  710.53   62.59
   2   1  -4  764.62   71.49
  -3   2  -4  669.23   65.39
   2   1  -4  705.23   46.10
   2   1  -4  781.12   45.20
  -2  -1   4  701.93   40.90
   3  -2   4  706.53   64.09
   3   0  -4  943.21   56.19
  -3   3  -4  781.72   71.89
   0  -3  -4  883.71   59.49
   0   3   4  904.91   63.49
   0   3   4 1016.50   64.79
  -3   0   4  968.60   53.89
   3  -3   4 1073.09   77.69
  -3   4  -4  509.05   71.89
  -1  -3  -4  497.45   44.60
   4  -1  -4  555.94   56.99
   4  -1  -4  471.45   56.09
   1   3   4  496.35   48.50
   3  -4   4  432.36   65.59
  -4   1   4  388.06   51.29
   1   3   4  508.75   47.90
  -3   5  -4  204.38   56.19
   5  -2  -4  169.18   50.09
  -5   2   4  241.38   47.10
   2   3   4  229.58   37.10
   2   3   4  244.68   37.40
   3  -5   4  225.68   53.59
  -3   6  -4  554.54   83.79
   6  -3  -4  812.42   87.29
   3   3   4  729.63   50.99
   3   3   4  664.13   48.30
  -6   3   4  744.83   78.09
   3  -6   4  691.43   79.19
   7  -4  -4  307.57   73.49
  -3   7  -4  300.87   74.09
  -7   4   4  364.26   71.09
   4   3   4  292.77   41.90
   4   3   4  491.05   80.39
   3  -7   4  250.97   62.89
   4   3   4  264.67   38.20
  -2   6  -4   96.99   49.10
   6  -4  -4   41.30   48.20
   4   2   4   64.89   28.00
   4   2   4   65.09   23.80
   4   2   4   54.29   39.50
   2  -6   4   49.40   36.80
  -6   4   4   64.99   43.90
  -1   5  -4  580.84   68.99
   5  -4  -4  577.14   77.39
  -1   5  -4  556.54   66.09
   4   1   4  561.74   60.99
  -5   4   4  632.74   78.69
   1  -5   4  500.95   56.19
   4   1   4  547.65   48.60
   4   1   4  545.35   51.39
  -4   0  -4   76.89   29.00
   4  -4  -4   86.09   44.70
   0   4  -4   23.40   29.30
   4   0   4  123.99   35.10
  -4   4   4   34.70   41.40
   4   0   4  112.89   32.40
   0  -4   4  128.19   30.40
   3  -4  -4  708.53   75.49
   1   3  -4  736.13   51.19
  -4   1  -4  778.52   60.99
   1   3  -4  874.71   55.59
   1   3  -4  804.42   81.59
  -3   4   4  723.63   72.49
   4  -1   4  712.83   64.09
   4  -1   4  845.22   72.99
   4  -1   4  814.52   63.49
   2   2  -4 2161.88   72.19
   2  -4  -4 2157.78  102.79
   2   2  -4 2013.60  107.89
   2   2  -4 2058.79   69.39
  -4   2  -4 2292.57  100.89
   4  -2   4 2174.18  102.49
  -2   4   4 2247.38  106.39
   4  -2   4 2165.08  104.19
   3   1  -4   16.20   37.20
   3   1  -4   -1.90   20.50
  -4   3  -4   20.50   38.00
   3   1  -4   23.50   21.50
   1  -4  -4   26.00   30.90
  -1   4   4   12.50   31.30
   4  -3   4  -18.20   37.50
   0  -4  -4  237.88   40.40
   4   0  -4  280.37   42.70
   4   0  -4  269.37   45.70
  -4   4  -4  179.28   55.49
   4  -4   4  377.36   66.89
  -4   0   4  164.08   46.90
   0   4   4  257.87   52.59
   5  -1  -4 1119.99   81.29
  -4   5  -4 1254.17  105.09
   5  -1  -4 1067.79   77.29
   1   4   4 1099.29   69.89
   1   4   4 1266.67   74.49
   4  -5   4 1179.28   99.69
  -5   1   4 1133.99   70.09
   6  -2  -4  269.97   59.09
  -4   6  -4  288.17   72.49
   4  -6   4  291.57   66.09
   2   4   4  247.58   42.60
  -6   2   4  251.47   50.19
   2   4   4  251.57   42.10
  -4   7  -4   58.79   54.29
   7  -3  -4   28.00   41.50
   3   4   4    5.20   22.30
   3   4   4  -61.09   21.00
  -7   3   4  -27.90   38.00
   4  -7   4  -27.20   40.50
  -4   8  -4  297.97   89.89
   8  -4  -4  166.28   67.29
   4   4   4   98.79   64.09
   4   4   4  211.18   42.00
  -4   9  -4   19.40   71.99
   9  -5  -4   20.40   58.79
   5   4   4    6.90   27.20
   5   4   4  -62.79   65.59
   8  -5  -4  -31.80   50.69
  -3   8  -4    6.10   52.99
   5   3   4  -44.10   46.60
   5   3   4   15.00   26.60
  -2   7  -4  -45.40   47.40
   7  -5  -4   45.40   47.10
   5   2   4   76.39   51.59
  -7   5   4  -70.59   40.00
   5   2   4   14.50   29.70
   5   2   4  -20.50   22.20
  -1   6  -4  174.08   47.80
   6  -5  -4  189.58   59.29
  -1   6  -4  185.28   55.99
   5   1   4  124.79   37.00
   5   1   4  113.39   33.00
   1  -6   4   55.09   32.90
  -6   5   4  190.18   57.99
   5   1   4  235.58   57.79
   5  -5  -4  148.69   52.59
   0   5  -4  197.08   45.20
   5   0   4  195.48   43.80
   5   0   4  134.89   35.40
  -5   5   4  115.49   50.39
   1   4  -4  482.55   50.29
   4  -5  -4  473.15   77.19
  -5   1  -4  474.15   52.09
   1   4  -4  569.44   82.19
   1   4  -4  551.74   53.99
   5  -1   4  610.34   59.79
   5  -1   4  580.94   64.59
  -4   5   4  482.25   73.69
   3  -5  -4  750.82   78.59
   2   3  -4  556.64   42.90
   2   3  -4  585.54   79.29
  -5   2  -4  523.45   63.09
   2   3  -4  564.84   45.80
   5  -2   4  592.54   71.79
  -3   5   4  553.74   75.69
   5  -2   4  643.34   67.09
  -5   3  -4  507.45   73.79
   2  -5  -4  522.85   66.59
   3   2  -4  460.05   73.29
   3   2  -4  472.85   37.60
   3   2  -4  542.35   41.10
  -2   5   4  441.66   66.99
   5  -3   4  528.15   69.49
   5  -3   4  492.35   71.39
   1  -5  -4  440.66   59.29
   4   1  -4  292.27   40.80
   4   1  -4  463.15   47.60
  -5   4  -4  365.96   68.69
   5  -4   4  290.07   63.59
  -1   5   4  316.47   53.79
  -1   5   4  309.07   79.59
   0  -5  -4  367.06   48.40
   5   0  -4  400.46   53.99
  -5   5  -4  433.96   77.19
   5   0  -4  409.96   53.49
   0   5   4  289.47   51.29
   5  -5   4  357.76   72.59
  -5   6  -4   39.10   53.49
   6  -1  -4  -16.40   33.30
   1   5   4    2.00   28.90
   1   5   4   11.60   32.10
   5  -6   4   -0.50   45.70
   7  -2  -4   61.89   44.80
  -5   7  -4  203.28   74.19
   2   5   4  185.48   43.00
   5  -7   4  157.98   61.69
   8  -3  -4  -15.90   46.50
  -5   8  -4  -59.19   56.89
   3   5   4  -33.10   29.20
   5  -8   4  -39.10   49.00
  -5   9  -4   82.39   90.49
   9  -4  -4   12.30   59.99
   4   5   4  160.58   84.09
   4   5   4  262.47   50.39
  -5  10  -4  395.36  118.29
  10  -5  -4  118.29   75.79
   5   5   4  188.78   47.20
   5   5   4  210.38   96.09
  -5  11  -4  150.28   99.99
  11  -6  -4  -42.80   62.89
   6   5   4  182.38  104.79
   6   5   4    8.30   34.00
  10  -6  -4  -26.00   59.89
  -4  10  -4  -75.09   72.69
   6   4   4   12.70   68.99
   6   4   4  -33.00   31.50
  -3   9  -4  187.68   86.49
   9  -6  -4  166.68   71.89
   6   3   4  361.86   97.69
   6   3   4  186.98   43.40
  -2   8  -4   50.99   63.69
   8  -6  -4   94.99   63.69
  -8   6   4  198.48   78.09
   6   2   4   30.80   34.40
   6   2   4   88.09   60.89
  -1   7  -4  197.98   61.49
   7  -6  -4  110.09   61.89
  -7   6   4  313.47   77.99
   6   1   4  258.17   65.29
   6   1   4  192.78   46.60
   0   6  -4  140.29   53.59
   6  -6  -4   23.30   51.29
  -6   6   4   53.89   51.39
   6   0   4   80.99   40.70
   6   0   4  139.99   46.30
  -6   1  -4  -55.49   23.10
   1   5  -4   11.00   29.70
   5  -6  -4  -10.40   39.30
   1   5  -4  -27.10   24.80
  -5   6   4  -63.49   38.40
   6  -1   4   -1.90   35.80
   2   4  -4   96.29   53.69
   4  -6  -4  100.89   48.20
  -6   2  -4  150.48   44.40
   2   4  -4  104.09   30.20
   2   4  -4  131.69   32.00
   6  -2   4   91.19   40.30
  -4   6   4  139.59   53.89
   6  -2   4  129.89   45.70
   3   3  -4  817.52   45.80
   3   3  -4  878.71   49.90
   3   3  -4  994.80   96.69
   3  -6  -4  866.01   86.29
  -6   3  -4  848.52   83.19
   6  -3   4  807.92   74.39
  -3   6   4  899.01   92.29
   6  -3   4 1062.59   94.09
   4   2  -4    9.10   19.60
   4   2  -4    5.30   20.40
   4   2  -4   28.30   45.80
   2  -6  -4   24.10   34.20
  -6   4  -4   70.29   49.80
   6  -4   4   32.20   45.00
   6  -4   4    3.70   39.50
  -2   6   4   39.30   44.00
   5   1  -4   35.70   30.60
   1  -6  -4   85.19   36.30
   5   1  -4  -12.60   25.60
  -6   5  -4    2.10   51.99
  -1   6   4   98.39   45.90
  -1   6   4   18.20   38.00
   6  -5   4  113.39   54.19
   6   0  -4   64.69   33.00
  -6   6  -4   17.60   51.39
   6   0  -4   14.80   37.30
   6  -6   4   24.50   50.19
   0   6   4   -3.90   38.80
  -6   7  -4   79.69   68.79
   7  -1  -4   43.90   44.70
   1   6   4   63.09   44.40
   6  -7   4  -71.69   46.70
  -6   8  -4  121.09   80.69
   8  -2  -4    2.30   49.90
   2   6   4   -3.60   39.00
   6  -8   4  -39.20   58.59
  -6   9  -4  148.29   92.89
   9  -3  -4   55.69   67.39
   3   6   4  137.69   50.89
  10  -4  -4  145.39   72.49
  -6  10  -4  112.39   97.49
   4   6   4  260.67   60.29
   4   6   4  188.58  101.39
  11  -5  -4  111.09   79.19
  -6  11  -4   75.79  108.79
   5   6   4   30.10   39.50
   5   6   4   79.69   88.19
  11  -7  -4   93.09   88.49
  -4  11  -4  307.37  122.09
   7   4   4  133.19   39.20
   7   4   4  113.29   97.79
  -3  10  -4  118.99   90.79
  10  -7  -4   82.19   70.69
   7   3   4  113.59   41.20
   7   3   4  110.59   95.49
  -2   9  -4   22.70   69.49
   9  -7  -4   67.89   71.89
   7   2   4   30.50   43.40
   7   2   4  134.19   81.89
  -1   8  -4   87.19   61.39
   8  -7  -4   74.79   62.89
  -8   7   4  197.98   84.39
   7   1   4   31.70   39.50
   0   7  -4  211.58   58.79
   7  -7  -4  118.39   68.99
  -7   7   4  128.99   68.49
   7   0   4  165.48   52.89
   1   6  -4  -34.20   32.60
   6  -7  -4  -82.99   41.70
  -6   7   4   18.40   53.39
   7  -1   4  -18.50   38.40
   5  -7  -4  643.04   95.09
   2   5  -4  515.45   57.59
   2   5  -4  694.03   61.39
   2   5  -4  694.23  100.79
  -5   7   4  668.03  101.19
   7  -2   4  716.23   88.09
   3   4  -4  206.48   33.90
   3   4  -4  242.18   39.30
  -7   3  -4  233.28   54.89
   4  -7  -4  127.19   56.09
   3   4  -4  260.07   71.09
   7  -3   4  231.48   64.59
   7  -3   4  296.77   60.49
  -4   7   4  380.36   78.79
   4   3  -4  158.08   30.30
   4   3  -4   33.50   58.89
   3  -7  -4  110.59   48.00
  -7   4  -4   58.79   52.39
   4   3  -4  150.98   30.00
  -3   7   4  185.28   59.99
   7  -4   4  127.69   50.39
   7  -4   4  124.79   60.99
  -7   5  -4  977.20  111.19
   5   2  -4  742.93  100.89
   5   2  -4  939.31   58.99
   5   2  -4  764.42   56.79
   7  -5   4  831.52  108.19
  -2   7   4  717.33   89.09
   6   1  -4  268.17   49.60
  -7   6  -4  298.57   83.99
   7  -6   4  310.27   82.39
  -1   7   4  154.98   55.59
  -7   7  -4   15.80   69.59
   7   0  -4   68.69   45.30
   7  -7   4  138.59   68.69
   0   7   4   54.69   50.79
   8  -1  -4   90.39   57.69
  -7   8  -4  172.18   90.99
   7  -8   4  187.08   85.19
   1   7   4  147.79   60.49
  -7   9  -4  152.48   97.29
   9  -2  -4  103.19   63.59
   2   7   4   87.89   59.89
   7  -9   4   68.79   83.89
  -7  10  -4   44.50   94.99
  10  -3  -4   53.99   72.79
   3   7   4  -71.89   40.80
  11  -4  -4   74.49   76.89
  -7  11  -4 -107.89  101.49
   4   7   4   91.89   54.59
   4   7   4  119.49  102.79
  10  -8  -4  117.89   76.79
  -2  10  -4  221.18   93.89
   8   2   4   89.89   49.80
   9  -8  -4  102.89   75.09
  -1   9  -4  -48.50   55.49
   8   1   4   84.79   49.30
   8  -8  -4  -73.69   53.69
   0   8  -4   30.90   49.50
   8   0   4   -0.20   43.50
  -8   8   4  -63.69   56.39
   1   7  -4  -33.50   43.50
   7  -8  -4   68.49   55.59
   8  -1   4  -33.70   43.50
  -7   8   4  -20.00   69.89
   2   6  -4  143.49   76.09
   6  -8  -4   66.09   59.99
   2   6  -4   61.19   38.60
   8  -2   4   46.00   48.40
  -6   8   4  159.88   73.89
   3   5  -4   73.09   33.20
   5  -8  -4   75.79   55.79
   3   5  -4   -5.40   55.59
   8  -3   4  151.68   61.29
  -5   8   4   49.00   66.69
   4   4  -4  411.46   93.29
   4   4  -4  253.97   37.20
   4   4  -4  241.88   38.10
  -4   8   4  276.57   85.69
   8  -4   4  352.36   65.19
   8  -4   4  169.68   70.09
   5   3  -4   12.40   60.99
   5   3  -4  -11.90   23.10
   5   3  -4   21.20   24.50
  -3   8   4    1.00   53.69
   8  -5   4  -53.69   53.39
   8  -5   4  -45.40   40.10
  -8   6  -4  -61.19   58.09
   6   2  -4   21.00   34.10
  -2   8   4  -17.70   49.50
   8  -6   4  -51.69   49.20
   7   1  -4   63.19   45.50
  -8   7  -4   21.30   66.69
   8  -7   4   -4.20   60.49
  -1   8   4    3.90   53.09
   8   0  -4  -17.60   44.40
  -8   8  -4  136.99   81.69
   0   8   4  -34.90   51.29
   8  -8   4   35.80   64.29
  -8   9  -4   79.39   90.39
   9  -1  -4   42.10   61.79
   8  -9   4   13.20   71.49
   1   8   4   96.89   63.59
  -8  10  -4  278.97  120.39
  10  -2  -4   86.89   72.19
   2   8   4  240.28   70.99
  10  -9  -4 -108.09   62.59
  -1  10  -4   56.19   76.39
   9   1   4   91.79   55.19
   9  -9  -4  -51.69   66.09
   0   9  -4    7.20   60.29
   9   0   4   25.30   48.20
  -9   9   4  110.39   94.19
   1   8  -4  -31.70   47.00
   8  -9  -4   74.79   70.89
  -8   9   4   22.90   83.89
   9  -1   4  -13.30   49.90
   7  -9  -4   17.10   62.99
   2   7  -4  -11.00   63.59
   2   7  -4   25.90   46.60
   9  -2   4   22.40   52.39
  -7   9   4   -6.80   76.09
   3   6  -4   12.20   64.59
   3   6  -4   74.59   37.00
  -6   9   4   44.80   77.79
   9  -3   4   49.30   63.09
   4   5  -4  169.68   36.60
   4   5  -4  142.39   71.69
  -5   9   4   68.79   78.59
   9  -4   4  240.38   80.09
   5   4  -4   40.10   70.79
   5   4  -4   28.20   26.60
  -4   9   4  -41.30   68.79
   9  -5   4  -11.60   60.79
   6   3  -4   51.09   79.99
   6   3  -4   47.00   34.60
   9  -6   4  130.69   76.39
  -3   9   4  120.69   75.19
   7   2  -4  109.29   49.30
   9  -7   4   84.09   70.89
  -2   9   4  141.49   76.19
   8   1  -4   51.59   47.20
  -9   8  -4   57.19  122.39
   9  -8   4  -70.09   63.39
  -1   9   4   43.10   61.99
  -9   9  -4  276.97  115.59
   9   0  -4  181.18   70.69
   0   9   4   86.39   70.39
   9  -9   4  109.49   84.09
  -9  10  -4  170.08  111.49
  10  -1  -4   51.49   60.19
   1   9   4  -43.10   61.69
   1   9  -4   23.50   82.69
   1   9  -4  -43.90   63.49
   9 -10  -4   11.00   79.39
  10  -1   4    4.90   57.39
  -9  10   4  125.79  110.69
   2   8  -4   67.29   57.99
   2   8  -4    9.30   78.89
  -8  10   4  175.18  111.09
  10  -2   4   69.99   65.69
   3   7  -4   17.90   74.49
   3   7  -4   77.89   43.40
  -7  10   4   71.59   92.99
  10  -3   4   74.09   72.19
   4   6  -4    9.10   67.59
   4   6  -4    0.10   29.10
  -6  10   4   30.50   87.29
  10  -4   4   76.09   59.49
   5   5  -4  107.29   32.90
   5   5  -4  -19.90   66.09
  10  -5   4   24.70   67.09
  -5  10   4  220.68   98.29
   6   4  -4  279.97  102.99
   6   4  -4   92.89   32.40
  -4  10   4  -74.19   68.19
  10  -6   4   89.69   75.79
   7   3  -4   13.40   36.00
  -3  10   4   68.49   78.99
  10  -7   4 -103.99   58.79
   8   2  -4   23.70   47.40
  10  -8   4   45.80   83.79
  -2  10   4  -23.70   70.49
   9   1  -4   26.90   53.29
  -1  10   4  122.89   77.89
  10  -9   4  -47.00   80.69
   4   7  -4  101.99   41.40
   4   7  -4  174.08   90.49
  11  -4   4    2.70   73.39
  -7  11   4  219.78  121.19
   5   6  -4  196.48  101.99
  -6  11   4  363.36  137.99
  11  -5   4  135.69   86.09
   6   5  -4  105.19   92.79
  -5  11   4   66.79   99.99
  11  -6   4   40.40   74.39
   7   4  -4   78.79   93.99
  -4  11   4  153.58  105.19
  11  -7   4  109.69   89.79
   0   0  -5 5774.62  137.39
   0   0   5 5691.63  135.49
   0   1  -5  304.17   41.30
  -1   0  -5  303.87   47.00
   1  -1  -5  205.08   38.80
   0   1  -5  281.27   42.70
   1   0   5  332.17   58.89
   1   0   5  373.96   49.00
  -1   1   5  294.57   44.00
  -1   1   5  285.57   44.20
   0  -1   5  346.57   45.80
  -1   1  -5   -1.60   26.10
   0  -1  -5   10.70   28.30
   1   0  -5  -11.70   23.60
   1  -1   5   -8.30   24.40
  -1   0   5   -3.20   23.20
   0   1   5  -23.60   29.50
   0   1   5  -10.80   25.30
  -1   2  -5  107.79   34.50
   2  -1  -5   82.69   34.10
  -1  -1  -5   70.89   28.10
  -1   2  -5   72.99   34.30
   1   1   5   52.09   35.00
   1   1   5   50.99   29.60
   1   1   5   72.69   27.80
  -2   1   5   77.49   32.70
  -2   1   5   46.90   30.00
   1  -2   5   45.90   30.90
   3  -2  -5  795.52   66.79
  -2  -1  -5  680.93   49.80
  -1   3  -5  707.83   64.29
   2   1   5  689.33   55.79
  -3   2   5  764.22   44.80
   2   1   5  739.03   51.29
   1  -3   5  771.92   60.89
  -3   2   5  597.84   62.39
   0   2  -5  367.56   50.09
   2  -2  -5  495.65   58.39
  -2   0  -5  443.46   49.40
   0   2  -5  450.55   48.30
   0   2  -5  455.25   55.49
   2   0   5  413.86   49.10
   2   0   5  367.56   43.30
  -2   2   5  324.57   49.99
   2   0   5  424.16   59.09
   0  -2   5  440.86   47.20
   1   1  -5   22.20   22.40
   1   1  -5  -11.00   29.20
  -2   1  -5   60.79   30.40
   1  -2  -5  -55.09   28.20
   1   1  -5   31.60   23.60
   2  -1   5   66.39   40.30
  -1   2   5   43.70   29.10
   2  -1   5   51.89   30.90
  -1  -1   5   -0.20   21.40
   2   0  -5  212.78   36.20
   2   0  -5  186.38   36.70
  -2   2  -5  209.78   47.10
   0  -2  -5  200.08   38.90
  -2   0   5  224.08   38.00
   0   2   5  222.68   39.30
   0   2   5  227.78   39.80
   2  -2   5  219.88   41.00
  -2   3  -5  250.87   49.20
   3  -1  -5  391.66   52.49
  -1  -2  -5  351.56   45.30
   2  -3   5  303.17   50.99
   1   2   5  262.17   41.00
   1   2   5  358.06   44.50
  -3   1   5  305.37   49.10
  -2  -2  -5  261.97   38.40
   4  -2  -5  202.58   50.19
  -2   4  -5  345.47   59.69
   2  -4   5  249.38   49.20
   2   2   5  280.57   42.20
  -4   2   5  214.18   47.80
  -4   2   5  229.18   24.40
  -2   5  -5  555.44   74.69
   5  -3  -5  624.64   78.19
   2  -5   5  579.14   65.79
  -5   3   5  735.63   75.19
   3   2   5  655.43   50.79
   3   2   5  762.52   56.99
  -3  -1  -5 1125.19   56.49
   4  -3  -5 1069.99   86.79
  -1   4  -5 1033.90   79.29
   3   1   5 1085.69   66.49
   1  -4   5  973.30   68.59
  -4   3   5 1174.78   87.49
   3   1   5 1158.88   68.39
   0   3  -5   32.90   29.30
   0   3  -5    2.50   40.30
   0   3  -5   11.80   23.20
   3  -3  -5   19.10   34.80
  -3   0  -5   50.19   27.40
   0  -3   5  -16.10   23.60
   3   0   5   27.50   26.40
   3   0   5  -11.90   17.30
   3   0   5   11.20   22.90
   3   0   5  -42.70   30.70
  -3   3   5  -19.00   30.60
   1   2  -5  403.76   61.79
   2  -3  -5  388.36   57.19
  -3   1  -5  386.36   52.09
   1   2  -5  379.16   44.30
  -2   3   5  392.76   54.09
   3  -1   5  416.86   54.79
   3  -1   5  452.85   61.39
  -1  -2   5  348.47   39.80
  -3   2  -5  243.38   50.69
   2   1  -5  259.87   41.40
   2   1  -5  312.47   55.79
   1  -3  -5  225.28   44.60
   3  -2   5  234.48   45.40
  -1   3   5  311.47   52.49
  -2  -1   5  264.67   37.40
   0  -3  -5  102.19   34.60
   3   0  -5  190.68   40.70
   3   0  -5  162.48   36.60
  -3   3  -5  151.98   46.90
   0   3   5  127.59   37.60
  -3   0   5  147.99   33.00
   0   3   5  128.09   35.90
   3  -3   5  142.49   41.30
  -3   4  -5  701.13   80.69
  -1  -3  -5  749.23   54.59
   4  -1  -5  665.83   62.89
  -4   1   5  699.33   59.99
   3  -4   5  725.33   74.79
   1   3   5  653.83   54.59
  -3   5  -5  324.67   65.69
   5  -2  -5  345.47   59.29
   2   3   5  257.87   43.80
   2   3   5  267.47   42.50
   3  -5   5  329.07   59.89
  -5   2   5  341.97   56.69
  -3   6  -5  -64.59   40.50
   6  -3  -5   31.40   43.50
   3   3   5   -2.60   21.20
   3   3   5  -11.60   22.20
  -6   3   5    4.70   34.60
   3  -6   5    7.10   36.90
  -3   7  -5   94.59   62.99
   7  -4  -5  131.39   59.89
  -7   4   5  236.58   58.69
   4   3   5  124.29   36.10
   4   3   5  220.18   66.89
   3  -7   5  268.97   61.09
   4   3   5  260.57   41.50
   6  -4  -5    9.80   43.80
  -2   6  -5   25.40   41.90
   4   2   5   67.69   31.90
   4   2   5   41.70   25.70
  -6   4   5  150.28   49.40
   2  -6   5   29.30   35.20
   4   2   5   94.89   46.00
  -1   5  -5  -20.10   33.40
  -1   5  -5  -41.50   30.80
   5  -4  -5  -48.40   37.30
   1  -5   5  -33.90   24.60
   4   1   5    9.20   21.50
  -5   4   5   25.80   39.20
   4   1   5    3.00   28.20
   4   1   5   23.10   30.30
   4  -4  -5  885.71   88.89
  -4   0  -5  728.63   55.59
   0   4  -5  753.52   65.09
   0   4  -5  776.62   68.09
   4   0   5  840.02   54.49
   4   0   5  772.72   64.59
  -4   4   5  772.82   81.19
   0  -4   5  800.02   58.59
   3  -4  -5  125.89   47.60
   1   3  -5  151.78   35.60
  -4   1  -5  222.08   43.30
   1   3  -5  150.38   38.70
   1   3  -5  118.59   50.59
   4  -1   5   33.80   42.30
   4  -1   5  162.08   42.10
  -3   4   5  109.69   43.50
   4  -1   5  158.68   46.90
  -1  -3   5  193.68   30.90
  -4   2  -5  345.47   58.99
   2   2  -5  428.76   73.19
   2   2  -5  265.67   41.40
   2   2  -5  378.36   40.30
   2  -4  -5  358.76   61.39
   4  -2   5  365.96   66.69
   4  -2   5  344.77   59.19
  -2   4   5  314.87   54.79
   3   1  -5 1456.35   67.89
  -4   3  -5 1629.54  100.49
   3   1  -5 1378.16   67.79
   1  -4  -5 1624.34   90.89
   4  -3   5 1317.67   93.89
  -1   4   5 1356.66   84.09
  -4   4  -5  303.17   62.69
   0  -4  -5  289.67   45.90
   4   0  -5  287.57   49.70
   0   4   5  314.37   52.69
   0   4   5  328.17   52.39
   4  -4   5  179.68   52.89
  -4   0   5  334.17   42.00
  -4   5  -5   25.00   49.99
   5  -1  -5   86.09   38.60
   5  -1  -5   96.99   39.70
  -5   1   5   71.69   34.20
   1   4   5  123.99   36.80
   4  -5   5  105.39   48.80
  -4   6  -5  382.06   77.49
   6  -2  -5  418.66   72.69
   2   4   5  310.37   48.90
   4  -6   5  376.66   70.99
   2   4   5  436.66   50.99
  -6   2   5  366.76   58.19
   7  -3  -5   95.09   54.29
  -4   7  -5  206.58   69.09
  -7   3   5   28.70   56.49
   3   4   5   83.69   34.80
   3   4   5  134.39   35.80
   4  -7   5   27.40   46.30
   8  -4  -5   58.79   59.49
  -4   8  -5  170.58   76.49
   4   4   5   59.29   62.19
   4   4   5  130.59   37.10
  -4   9  -5  466.15  104.99
   9  -5  -5  534.35  106.09
   5   4   5  401.26  100.99
   5   4   5  237.28   49.20
  -3   8  -5  -26.70   52.79
   8  -5  -5    8.10   56.49
   5   3   5   79.89   59.29
   5   3   5   24.60   31.60
   7  -5  -5   20.20   50.99
  -2   7  -5  -15.50   44.40
   5   2   5   85.69   52.49
   5   2   5   28.70   29.70
  -7   5   5   18.70   43.70
  -1   6  -5  148.59   55.29
  -1   6  -5   96.89   48.40
   6  -5  -5  244.28   65.59
  -6   5   5  156.88   58.49
   1  -6   5  175.88   45.00
   5   1   5  174.38   39.90
   5   1   5  215.48   56.49
   5   1   5  121.69   41.70
   5  -5  -5   96.99   49.00
   0   5  -5   14.80   32.80
  -5   5   5   70.09   46.00
   0  -5   5   43.40   30.50
   5   0   5  -12.60   29.60
   1   4  -5  182.48   38.20
   1   4  -5  194.48   65.19
   1   4  -5  181.68   38.60
   4  -5  -5  191.38   56.09
  -5   1  -5  173.48   40.60
   5  -1   5  181.28   43.60
   5  -1   5  147.29   44.40
   5  -1   5  124.49   45.30
  -4   5   5  115.19   50.99
  -5   2  -5 1914.81  102.59
   2   3  -5 2028.60  122.69
   2   3  -5 1994.50   80.89
   2   3  -5 2033.40   78.99
   3  -5  -5 2105.79  114.09
  -3   5   5 1970.20  115.29
   5  -2   5 2081.19  113.69
   5  -2   5 2008.00  111.69
   3   2  -5  179.08   61.79
  -5   3  -5  284.97   61.09
   3   2  -5  273.87   41.20
   2  -5  -5  281.67   55.99
   3   2  -5  308.47   39.20
   5  -3   5  188.08   55.49
   5  -3   5  431.66   78.69
  -2   5   5  261.27   51.79
   1  -5  -5    9.40   33.50
  -5   4  -5   47.60   47.80
   4   1  -5   25.60   24.20
   4   1  -5    6.50   24.40
   5  -4   5   23.10   41.30
  -1   5   5   -7.00   30.70
   0  -5  -5  569.14   60.09
  -5   5  -5  505.85   85.29
   5   0  -5  661.43   62.79
   5   0  -5  566.14   62.09
   0   5   5  687.03   71.09
   5  -5   5  586.54   82.39
   0   5   5  465.25   62.89
   6  -1  -5   60.29   41.70
  -5   6  -5   61.49   57.09
  -6   1   5   44.50   32.30
   1   5   5   10.80   32.70
   5  -6   5  -47.10   39.50
   1   5   5   74.69   41.60
   7  -2  -5   44.10   49.40
  -5   7  -5  135.59   67.59
   2   5   5  -23.40   29.70
   5  -7   5   86.79   54.69
   8  -3  -5   81.89   61.29
  -5   8  -5   65.69   70.99
   5  -8   5   37.20   59.19
   3   5   5   11.30   37.30
  -5   9  -5  -30.90   76.39
   9  -4  -5  -66.69   55.89
   4   5   5   10.40   39.70
   4   5   5   27.90   78.09
  10  -5  -5   42.20   56.49
  -5  10  -5  -99.09   78.69
   5   5   5  -85.39   72.09
   5   5   5   73.49   41.60
  -5  11  -5 -152.98   81.19
  11  -6  -5    8.50   73.29
   6   5   5   56.99   44.40
   6   5   5   57.49   94.29
  10  -6  -5  504.95  114.99
  -4  10  -5   97.59   88.29
   6   4   5  268.17   95.99
   6   4   5  112.89   44.00
  -3   9  -5   37.20   72.89
   9  -6  -5   27.80   65.99
   6   3   5   25.60   69.19
   6   3   5   15.70   35.40
   8  -6  -5   62.89   63.69
  -2   8  -5   29.90   57.59
   6   2   5   49.90   57.19
   6   2   5   37.80   33.40
  -8   6   5  -28.60   55.59
   7  -6  -5   22.20   51.09
  -1   7  -5   41.80   49.90
   6   1   5   54.09   38.00
  -7   6   5   19.50   56.29
   6   1   5  -33.30   41.90
   0   6  -5   42.90   38.60
   6  -6  -5   -3.30   47.20
  -6   6   5  -30.90   46.00
   6   0   5   21.70   36.60
  -6   1  -5   37.50   31.30
   1   5  -5   32.60   52.59
   5  -6  -5   12.40   43.70
   1   5  -5   44.90   35.00
   1   5  -5  -28.20   27.30
  -5   6   5   44.90   45.70
   6  -1   5   20.20   38.90
   6  -1   5   11.00   30.10
   2   4  -5  204.48   37.90
  -6   2  -5  169.78   45.30
   2   4  -5  173.88   65.49
   4  -6  -5  238.58   60.19
   2   4  -5  167.58   38.50
   6  -2   5  238.58   57.19
  -4   6   5  155.08   59.19
   6  -2   5  237.98   54.89
   3   3  -5  178.78   31.90
  -6   3  -5  127.19   49.70
   3   3  -5  134.49   62.79
   3   3  -5  156.28   33.40
   3  -6  -5  136.79   51.79
  -3   6   5  104.49   50.59
   6  -3   5  211.18   56.39
   6  -3   5  111.09   47.50
   2  -6  -5  140.99   48.20
   4   2  -5  172.58   34.10
   4   2  -5  108.79   55.79
   4   2  -5  106.29   30.50
  -6   4  -5   61.49   55.19
   6  -4   5  111.99   51.09
   6  -4   5   54.69   49.80
  -2   6   5  197.78   55.39
   1  -6  -5   36.60   35.70
   5   1  -5   28.80   31.70
  -6   5  -5  128.69   64.69
   5   1  -5   78.59   33.10
  -1   6   5   97.49   44.50
   6  -5   5   85.09   52.09
  -6   6  -5   77.29   60.69
   6   0  -5   39.30   39.20
   6  -6   5    9.70   50.89
   0   6   5   82.29   44.40
  -6   7  -5   48.50   61.99
   7  -1  -5  -12.50   44.00
   6  -7   5  -58.69   51.49
   1   6   5  -38.20   35.90
   8  -2  -5  -15.90   48.00
  -6   8  -5  -97.69   62.69
   2   6   5  -24.50   39.60
   6  -8   5  -80.49   57.49
   9  -3  -5   -6.50   56.79
  -6   9  -5  145.09   87.79
   3   6   5    0.30   42.90
  10  -4  -5  180.88   81.29
  -6  10  -5  528.15  126.89
   4   6   5  365.96  109.89
   4   6   5  315.47   64.29
  11  -5  -5  -24.30   65.49
  -6  11  -5   63.39  103.79
   5   6   5  -51.79   84.39
   5   6   5   -0.50   45.00
  11  -7  -5   88.09   81.99
  -4  11  -5  117.89   99.39
   7   4   5    9.00   37.50
  10  -7  -5  236.18   94.99
  -3  10  -5  193.18  102.29
   7   3   5  307.87  107.79
   7   3   5  159.38   50.59
   9  -7  -5   22.00   63.89
  -2   9  -5   80.89   73.09
   7   2   5   70.69   45.50
   7   2   5   88.49   74.29
  -1   8  -5   86.39   63.39
   8  -7  -5   44.20   65.69
  -8   7   5  148.79   76.29
   7   1   5    2.80   36.40
   0   7  -5  361.86   73.49
   7  -7  -5  294.07   81.69
  -7   7   5  376.96   88.19
   7   0   5  308.67   66.39
   1   6  -5   99.99   45.20
   1   6  -5  239.68   81.99
   6  -7  -5  126.89   63.09
  -6   7   5  193.98   72.09
   7  -1   5   56.29   46.80
   5  -7  -5   41.20   50.59
   2   5  -5    8.40   51.29
   2   5  -5  -35.40   28.80
   7  -2   5  -46.60   33.00
  -5   7   5   -3.90   56.39
   3   4  -5  534.95   49.90
  -7   3  -5  649.54   82.19
   4  -7  -5  628.04   91.39
   3   4  -5  638.24   96.19
   3   4  -5  568.14   52.39
   7  -3   5  447.06   68.99
  -4   7   5  684.63   97.99
   7  -3   5  659.23   88.69
   4   3  -5  337.77   42.50
   4   3  -5  262.67   75.09
  -7   4  -5  180.48   62.69
   4   3  -5  235.08   40.60
   3  -7  -5  268.27   64.09
   7  -4   5  306.67   66.29
  -3   7   5  392.16   77.69
   7  -4   5  262.47   73.09
   5   2  -5   54.29   28.90
  -7   5  -5  -18.00   53.19
   5   2  -5    7.20   27.00
   5   2  -5  -42.80   48.50
  -2   7   5   -7.30   41.80
   7  -5   5  134.69   57.89
  -7   6  -5   99.39   69.39
   6   1  -5   76.79   41.40
  -1   7   5  124.29   58.09
   7  -6   5   94.49   65.09
   7   0  -5  158.78   57.39
  -7   7  -5  110.99   75.19
   0   7   5   51.89   51.29
   7  -7   5   55.39   65.99
   8  -1  -5   45.60   51.39
  -7   8  -5  126.29   84.89
   1   7   5   56.49   51.99
   7  -8   5  100.09   71.19
  -7   9  -5  372.16  113.39
   9  -2  -5  370.66   86.69
   2   7   5  132.19   58.59
   7  -9   5  297.87   97.89
  10  -3  -5   15.80   67.69
  -7  10  -5  134.79  103.49
   3   7   5    4.60   50.09
  -7  11  -5   14.90  101.99
  11  -4  -5   -4.00   73.69
   4   7   5  -61.99   48.00
  -2  10  -5   92.89   82.09
  10  -8  -5  -54.89   58.49
   8   2   5   49.99   45.70
   9  -8  -5  266.47   90.49
  -1   9  -5  147.59   75.29
   8   1   5  171.38   58.49
   0   8  -5   73.99   58.29
   8  -8  -5  -38.50   57.49
   8   0   5   66.89   47.30
  -8   8   5   83.99   72.49
   7  -8  -5   87.99   62.99
   1   7  -5  -73.29   62.89
   1   7  -5  -24.80   44.50
   8  -1   5   11.30   45.20
  -7   8   5  -21.60   61.49
   6  -8  -5  205.98   78.39
   2   6  -5  208.18   53.79
   2   6  -5   53.99   63.29
   8  -2   5  203.78   63.69
  -6   8   5  -31.50   66.49
   5  -8  -5   87.19   61.29
   3   5  -5  191.88   42.20
   3   5  -5  251.37   85.89
   8  -3   5  152.68   62.89
  -5   8   5  201.18   80.89
   4   4  -5   73.49   65.89
   4   4  -5   32.70   30.10
   8  -4   5  193.08   57.99
   8  -4   5   99.69   63.39
  -4   8   5   28.10   63.69
   5   3  -5  483.75   53.19
   5   3  -5  212.58   80.69
   8  -5   5  497.95   97.79
  -3   8   5  643.54  102.19
   8  -5   5  499.25   84.19
   6   2  -5   16.40   34.60
  -8   6  -5   52.99   68.49
   8  -6   5  -17.30   59.79
  -2   8   5    1.80   51.39
  -8   7  -5  152.28   88.59
   7   1  -5  237.58   58.09
  -1   8   5  104.89   60.19
   8  -7   5   84.39   74.39
  -8   8  -5  258.07   93.79
   8   0  -5   72.99   54.49
   0   8   5   70.59   62.59
   8  -8   5  -89.69   58.69
  -8   9  -5  104.49   96.79
   9  -1  -5  168.98   77.39
   8  -9   5  298.67   97.89
   1   8   5   -4.80   61.79
  -8  10  -5   96.69  108.09
  10  -2  -5   30.90   66.99
   2   8   5   -1.50   54.59
  10  -9  -5  -39.10   68.49
  -1  10  -5   57.19   78.59
   9   1   5    9.60   50.99
   9  -9  -5   31.00   71.79
   0   9  -5   20.50   63.69
  -9   9   5  -24.00   79.09
   9   0   5    2.40   48.30
   1   8  -5   29.10   53.69
   8  -9  -5   -7.30   56.99
   1   8  -5   90.69   87.69
  -8   9   5  -95.09   80.09
   9  -1   5  -40.30   46.20
   2   7  -5  -44.00   61.29
   2   7  -5  -39.60   44.60
   7  -9  -5  -12.60   54.99
  -7   9   5 -116.69   65.09
   9  -2   5   -6.00   49.60
   3   6  -5  -36.90   59.79
   3   6  -5    5.80   36.80
  -6   9   5   47.40   85.79
   9  -3   5  -61.29   48.10
   4   5  -5  157.98   39.70
   4   5  -5  267.87   89.69
   9  -4   5   93.79   72.19
  -5   9   5   42.50   75.09
   5   4  -5   48.40   32.60
   5   4  -5   29.10   64.09
   9  -5   5    1.60   60.49
  -4   9   5   30.30   75.49
   6   3  -5    4.10   65.39
   6   3  -5  -10.50   35.20
  -3   9   5  -84.29   56.19
   9  -6   5 -110.79   56.19
   7   2  -5  154.38   49.40
  -2   9   5  -42.20   58.89
   9  -7   5  -43.50   60.39
   8   1  -5   17.80   49.40
  -1   9   5    9.50   59.49
   9  -8   5  180.18   91.19
  -9   9  -5   96.49   93.59
   9   0  -5   10.50   56.89
   9  -9   5  -19.60   76.09
   0   9   5   11.10   61.39
  10  -1  -5  -60.69   61.29
  -9  10  -5  312.47  126.49
   1   9   5  122.29   76.09
   1   9  -5  -64.19   80.19
   1   9  -5   26.10   64.99
   9 -10  -5  -22.40  108.79
  10  -1   5   44.00   63.59
  -9  10   5   63.49   99.39
   2   8  -5   -3.70   68.89
   2   8  -5   58.29   53.49
  10  -2   5   11.70   60.29
  -8  10   5   34.70  104.89
   3   7  -5   23.70   44.90
   3   7  -5  -40.80   65.19
  10  -3   5   45.90   64.59
  -7  10   5  -30.30   79.79
   4   6  -5  195.48   90.79
   4   6  -5   67.89   40.10
  -6  10   5  158.68   96.69
  10  -4   5   78.49   66.19
   5   5  -5  -33.60   29.00
   5   5  -5  -65.09   66.59
  -5  10   5  100.79   91.29
  10  -5   5    5.70   68.49
   6   4  -5   -4.30   74.59
   6   4  -5   55.99   35.10
  10  -6   5   17.50   69.69
  -4  10   5   31.70   76.69
   7   3  -5  -18.10   40.30
  10  -7   5   33.10   78.59
  -3  10   5  117.59   78.59
   8   2  -5  107.09   53.19
  -2  10   5  -28.50   74.69
  10  -8   5   -9.80   79.59
   9   1  -5    6.40   57.49
  -1  10   5  253.67   96.29
  10  -9   5   13.10   79.09
   4   7  -5   -2.90   38.40
  11  -4   5  -18.60   66.69
  -7  11   5  -11.30  100.89
   5   6  -5  191.88   98.69
   5   6  -5  184.98   42.90
  11  -5   5  264.57   98.19
  -6  11   5  156.78  115.39
   6   5  -5  138.79  102.49
  11  -6   5  107.29   89.09
  -5  11   5  253.47  118.99
   7   4  -5   39.00   37.40
  -4  11   5   34.70   93.79
  11  -7   5   75.69   94.99
   0   0  -6 1254.07   73.69
   0   0   6 1241.38   70.29
   0   1  -6  -22.00   28.30
  -1   0  -6    5.30   29.40
   1  -1  -6   14.30   30.20
  -1   1   6   31.30   28.80
  -1   1   6    0.50   30.50
   0  -1   6   32.50   28.40
   1   0   6   29.00   26.90
   1   0   6   36.80   39.60
   0  -1  -6  226.48   40.60
  -1   1  -6  249.97   45.10
   1   0  -6  231.48   41.70
   0   1   6  271.17   46.00
   0   1   6  225.08   45.40
   1  -1   6  248.58   45.90
  -1   0   6  252.07   39.70
   2  -1  -6  234.98   45.20
  -1   2  -6  242.28   44.70
  -1   2  -6  234.88   39.40
  -1  -1  -6  253.67   41.20
   1   1   6  258.17   51.69
   1   1   6  249.78   41.90
   1  -2   6  292.27   45.80
  -2   1   6  303.27   47.90
  -2   1   6  284.17   48.60
  -2  -1  -6  687.63   54.09
   3  -2  -6  565.94   69.19
  -1   3  -6  681.63   68.79
  -3   2   6  629.14   64.19
   2   1   6  604.44   50.69
   1  -3   6  650.03   61.49
   2   1   6  729.43   59.69
  -3   2   6  610.24   48.10
   0   2  -6  526.25   55.09
   2  -2  -6  576.04   65.49
   0   2  -6  493.75   55.69
  -2   0  -6  519.55   55.59
   2   0   6  557.54   68.59
   2   0   6  442.66   52.69
  -2   2   6  446.16   58.89
  -2   2   6  581.14   52.49
   0  -2   6  515.65   52.19
   1   1  -6  789.12   60.99
  -2   1  -6  758.22   66.19
   1   1  -6  830.02   56.99
   1  -2  -6  714.93   66.59
  -1   2   6  761.42   64.09
   2  -1   6  669.43   73.59
   2  -1   6  919.71   69.69
  -1  -1   6  756.12   54.59
  -2   2  -6  270.97   48.10
   0  -2  -6  297.27   50.89
  -2   2  -6  230.68   33.50
   2   0  -6  292.47   48.80
   2   0  -6  217.78   40.40
  -2   0   6  250.77   42.30
   2  -2   6  340.87   55.99
   0   2   6  217.98   39.80
   3  -1  -6  673.53   64.69
  -1  -2  -6  637.34   55.79
  -2   3  -6  575.34   66.79
   1   2   6  517.45   52.99
   2  -3   6  570.64   62.89
  -3   1   6  563.74   57.19
   1   2   6  601.84   53.29
  -2   4  -6  264.97   56.19
   4  -2  -6  147.79   43.60
  -2  -2  -6  211.08   37.90
   2  -4   6  264.77   51.49
   2   2   6  262.37   44.90
  -4   2   6  198.28   34.20
  -4   2   6  226.08   48.90
   5  -3  -6  120.89   50.39
  -2   5  -6  125.79   48.50
   2  -5   6   31.70   35.30
   3   2   6   64.19   32.80
  -5   3   6  123.39   45.10
   3   2   6   50.59   29.30
  -3  -1  -6  859.61   56.79
   4  -3  -6  950.90   84.29
  -1   4  -6  784.42   76.39
   3   1   6  805.92   64.69
  -4   3   6  831.32   80.69
   1  -4   6  883.81   68.99
   3  -3  -6  365.76   63.49
   0   3  -6  386.76   51.59
   0   3  -6  345.87   60.39
  -3   0  -6  392.36   50.49
   0   3  -6  327.17   54.29
   3   0   6  359.66   31.80
  -3   3   6  300.67   57.59
   0  -3   6  350.06   48.70
   3   0   6  357.66   54.49
   3   0   6  366.16   64.59
   3   0   6  375.96   49.40
  -3   1  -6  183.08   42.50
   1   2  -6  191.28   40.10
   2  -3  -6  228.98   47.20
   1   2  -6  145.89   46.90
   1   2  -6  203.28   37.90
  -1  -2   6  185.68   34.50
   3  -1   6  132.09   47.20
  -2   3   6  191.58   46.30
   3  -1   6  117.79   37.60
   2   1  -6   39.50   25.70
   1  -3  -6   34.00   33.90
  -3   2  -6    9.70   35.10
   2   1  -6   50.69   31.00
  -2  -1   6   76.89   28.20
  -1   3   6   56.29   34.40
   3  -2   6   17.90   34.20
   3   0  -6  202.88   41.90
  -3   3  -6  222.18   49.90
   3   0  -6  124.69   36.70
   0  -3  -6  182.58   40.80
   0   3   6  194.18   41.50
  -3   0   6  221.78   38.50
   3  -3   6  218.38   49.20
  -3   4  -6  204.68   58.59
   4  -1  -6   84.99   40.50
  -1  -3  -6   58.19   32.20
   3  -4   6  180.28   49.10
   1   3   6  197.78   41.00
   1   3   6  120.49   35.30
  -4   1   6  201.78   44.80
  -3   5  -6   14.20   43.60
   5  -2  -6   25.30   37.00
  -5   2   6    3.70   16.60
   3  -5   6   23.80   35.40
   2   3   6    1.70   25.80
  -5   2   6  -13.50   30.30
   6  -3  -6  215.58   60.79
  -3   6  -6   86.69   57.49
   3   3   6  224.48   45.10
   3   3   6  177.88   38.10
  -6   3   6  279.17   59.09
   3  -6   6  138.39   51.39
  -3   7  -6   63.49   56.09
   7  -4  -6  102.59   55.19
  -7   4   6  152.68   56.19
   4   3   6   36.30   32.00
   3  -7   6  132.79   52.49
   4   3   6  128.59   56.79
  -2   6  -6  101.29   54.59
   6  -4  -6  300.07   70.29
   4   2   6  188.78   37.10
   4   2   6  200.28   46.00
   2  -6   6  371.86   64.19
  -6   4   6  226.38   62.99
   4   2   6  271.57   58.19
   5  -4  -6  127.79   53.99
  -1   5  -6   27.20   39.30
  -5   4   6  116.69   52.89
   4   1   6   49.20   34.10
   4   1   6  106.39   35.80
   1  -5   6   82.49   33.90
   0   4  -6   11.70   27.00
   4  -4  -6  135.69   49.40
   0   4  -6   -7.80   47.90
   0   4  -6   36.70   36.60
  -4   0  -6  -13.70   26.90
  -4   4   6   42.10   41.90
   4   0   6   21.50   21.90
   4   0   6   60.89   35.10
   0  -4   6   56.39   28.80
   4   0   6   51.69   30.90
  -4   1  -6  310.27   53.19
   1   3  -6  270.27   44.80
   3  -4  -6  227.68   52.69
   1   3  -6  270.17   62.59
   4  -1   6  268.87   59.59
   4  -1   6  251.07   52.29
  -1  -3   6  295.17   41.60
  -3   4   6  231.38   53.19
  -4   2  -6   15.70   34.20
   2   2  -6    0.00   24.70
   2   2  -6  -65.19   30.60
   2  -4  -6   45.40   37.80
   4  -2   6   -1.40   42.50
   4  -2   6    9.50   33.80
  -2  -2   6   22.50   24.00
  -2   4   6   11.00   33.30
   3   1  -6  111.79   35.10
  -4   3  -6  150.48   48.30
   1  -4  -6  133.99   43.60
   4  -3   6   94.89   44.30
  -3  -1   6  120.59   30.80
  -1   4   6  108.29   41.10
  -4   4  -6  843.22   93.19
   0  -4  -6 1007.60   71.99
   4   0  -6  866.61   68.29
   0   4   6  893.31   73.99
   0   4   6  864.91   74.79
   4  -4   6  946.21   86.79
  -4   0   6  849.41   60.29
  -4   5  -6  506.95   81.69
   5  -1  -6  435.86   63.39
  -1  -4  -6  476.45   53.59
   5  -1  -6  402.56   63.99
  -5   1   6  366.26   52.49
   1   4   6  467.95   56.69
   4  -5   6  438.46   71.19
   6  -2  -6  166.28   52.89
  -4   6  -6   11.50   50.09
   2   4   6  204.78   45.00
  -6   2   6  139.99   42.60
   4  -6   6  119.09   50.69
   2   4   6  146.09   41.50
   7  -3  -6  182.68   63.19
  -4   7  -6  221.38   74.79
   3   4   6  319.57   53.19
   4  -7   6  292.67   70.59
   8  -4  -6    7.50   55.39
  -4   8  -6   91.79   68.49
   4   4   6  122.49   68.69
   4   4   6   27.30   34.30
  -4   9  -6  424.26  100.79
   9  -5  -6  138.99   72.89
   5   4   6  349.87   98.99
   5   4   6  244.58   53.39
  -3   8  -6  239.98   77.99
   8  -5  -6   62.59   56.49
   5   3   6  190.98   46.80
   5   3   6  297.67   78.09
   7  -5  -6   83.89   56.29
  -2   7  -6   68.49   53.39
  -7   5   6   96.49   55.59
   5   2   6  150.58   53.19
   5   2   6  139.99   43.00
   6  -5  -6  152.18   56.29
  -1   6  -6   66.69   49.20
   1  -6   6  199.78   49.70
   5   1   6  106.59   47.50
   5   1   6   91.49   35.00
  -6   5   6  200.88   64.69
   5   1   6   68.29   38.30
   0   5  -6  179.88   51.59
  -5   0  -6  270.77   43.60
   5  -5  -6  153.38   60.09
   0   5  -6  195.08   50.39
   5   0   6  236.88   48.90
  -5   5   6  302.37   70.99
   0  -5   6  151.98   36.40
   4  -5  -6  306.37   68.39
   1   4  -6  190.58   61.09
   1   4  -6  245.78   48.90
  -5   1  -6  253.57   46.90
   5  -1   6  237.68   62.39
  -4   5   6  178.48   55.59
   5  -1   6  445.76   63.69
   2   3  -6 1076.19   65.19
   2   3  -6 1113.89   68.39
  -5   2  -6 1198.78   86.79
   2   3  -6 1328.67  107.29
   3  -5  -6 1176.48   97.69
   5  -2   6 1177.78   92.99
   5  -2   6 1276.37   95.19
  -3   5   6 1293.87  100.29
   3   2  -6  522.55   54.29
  -5   3  -6  449.76   72.29
   3   2  -6  527.95   81.59
   3   2  -6  497.25   47.90
   2  -5  -6  590.94   75.09
  -2   5   6  528.15   72.89
   5  -3   6  536.15   76.99
   5  -3   6  425.16   68.89
   4   1  -6  177.68   40.40
   4   1  -6  208.28   41.20
  -5   4  -6  129.19   53.89
   1  -5  -6  234.18   47.60
  -1   5   6  174.08   47.90
   5  -4   6  157.08   55.59
   5   0  -6  241.68   49.70
   0  -5  -6  268.87   48.80
  -5   5  -6  217.28   66.69
   5  -5   6  186.08   59.29
   0   5   6  256.57   55.79
  -5   6  -6  213.58   72.59
   6  -1  -6  314.37   62.09
   1   5   6  217.08   53.49
   5  -6   6  317.27   69.99
  -5   7  -6  201.08   72.59
   7  -2  -6   20.70   50.79
   2   5   6   18.60   36.50
   5  -7   6  -17.20   45.00
  -5   8  -6  -18.40   58.29
   8  -3  -6   80.79   60.39
   5  -8   6   60.09   60.39
   3   5   6   42.30   40.40
   9  -4  -6  420.06   92.49
  -5   9  -6  455.55  113.99
   4   5   6  578.94  118.39
   4   5   6  486.25   68.39
  -5  10  -6   30.20   91.19
  10  -5  -6   78.59   79.99
   5   5   6  -24.10   74.49
   5   5   6  107.19   46.30
  -4  10  -6   59.99   82.79
  10  -6  -6  -26.50   65.49
   6   4   6   35.90   74.49
   6   4   6   74.19   43.60
   9  -6  -6  -46.80   62.49
  -3   9  -6   25.00   67.59
   6   3   6  119.39   43.60
   6   3   6   27.20   66.89
  -2   8  -6    0.10   52.29
   8  -6  -6  -60.49   49.10
  -8   6   6   -2.10   57.49
   6   2   6  -36.10   35.00
   6   2   6  -61.69   47.10
  -1   7  -6   11.60   50.99
   7  -6  -6    1.40   55.29
   6   1   6  -44.10   33.50
  -7   6   6  -16.70   50.99
   6   1   6  -29.50   41.10
   0   6  -6   31.80   38.20
   6  -6  -6  -80.39   40.60
  -6   6   6   39.70   59.29
   6   0   6   23.50   37.10
   5  -6  -6   57.99   51.29
   1   5  -6   63.19   39.10
   1   5  -6   56.39   52.19
   1   5  -6    5.10   26.40
  -5   6   6   48.10   50.39
   6  -1   6    3.20   36.10
   2   4  -6  124.09   36.10
  -6   2  -6   82.29   40.40
   2   4  -6   93.89   54.99
   2   4  -6  147.29   36.30
   4  -6  -6  126.59   57.09
   6  -2   6  129.89   48.90
   6  -2   6   86.99   45.40
  -4   6   6  147.59   58.89
   3   3  -6  -15.80   44.20
  -6   3  -6   54.99   43.20
   3   3  -6   17.50   24.10
   3   3  -6    1.20   20.20
   3  -6  -6   44.00   43.00
   6  -3   6  -37.80   40.70
   6  -3   6    4.60   40.50
  -3   6   6   -8.20   40.20
  -6   4  -6   37.00   48.30
   2  -6  -6   49.20   40.00
   4   2  -6    6.80   48.50
   4   2  -6  -36.60   23.60
   4   2  -6  -12.60   20.90
   6  -4   6  -63.69   34.40
  -2   6   6   24.10   40.30
   6  -4   6   12.40   48.50
   1  -6  -6  228.38   53.49
   5   1  -6  136.69   41.40
   5   1  -6  160.18   44.30
  -6   5  -6  263.67   72.79
   6  -5   6   53.79   50.49
  -1   6   6  189.58   55.19
  -6   6  -6  -36.10   57.29
   6   0  -6    5.30   38.70
   6  -6   6  -14.30   51.59
   0   6   6  -29.70   35.10
   7  -1  -6    5.00   43.30
  -6   7  -6   92.49   69.99
   6  -7   6   84.99   69.99
   1   6   6  -51.99   34.10
  -6   8  -6    3.50   70.49
   8  -2  -6    0.80   45.70
   6  -8   6   28.20   65.99
  -6   9  -6   72.29   90.49
   9  -3  -6   20.80   63.29
  -6  10  -6   38.40   98.89
  10  -4  -6   30.40   63.69
   4   6   6  152.58   89.99
  10  -7  -6   -8.10   69.49
  -3  10  -6   44.80   82.49
   7   3   6  -21.50   40.70
   7   3   6  -34.00   72.19
  -2   9  -6  400.16   96.09
   7   2   6  297.37   64.09
   7   2   6  286.87   84.49
  -1   8  -6  -39.00   48.90
   8  -7  -6  -53.79   52.29
   7   1   6  -23.00   39.20
  -8   7   6   63.19   67.19
   7  -7  -6  -17.60   57.39
   0   7  -6  -63.09   38.30
   7   0   6   38.20   46.70
  -7   7   6  113.59   66.79
   1   6  -6  172.68   52.09
   6  -7  -6  301.27   81.49
   1   6  -6  147.59   80.49
  -6   7   6  105.39   71.69
   7  -1   6  160.48   57.39
   5  -7  -6  174.78   65.19
   2   5  -6  188.08   71.69
   2   5  -6  111.29   45.10
  -5   7   6  214.38   71.89
   7  -2   6  268.77   66.29
   3   4  -6   15.10   36.60
   3   4  -6  143.69   65.99
   3   4  -6   91.69   36.90
   4  -7  -6  118.79   55.29
  -4   7   6   82.79   60.69
   7  -3   6  203.78   56.79
   7  -3   6   35.40   49.60
   4   3  -6   66.69   31.30
   4   3  -6  153.98   40.30
   4   3  -6    2.40   52.69
  -7   4  -6  114.59   53.39
   3  -7  -6   96.59   52.79
  -3   7   6   39.00   47.00
   7  -4   6  193.48   62.79
   7  -4   6  128.09   58.19
   5   2  -6  326.77   54.09
  -7   5  -6  291.27   82.39
  -2   7   6  376.66   79.89
   7  -5   6  351.36   81.29
  -7   6  -6  -36.70   56.49
   6   1  -6    1.80   36.00
   7  -6   6  111.49   63.09
  -1   7   6  -48.80   39.70
  -7   7  -6  -92.29   65.69
   7   0  -6   47.00   44.30
   7  -7   6   37.90   61.89
   0   7   6   28.60   50.19
   8  -1  -6   43.10   55.29
  -7   8  -6  -59.49   77.29
   7  -8   6  -52.29   57.49
   1   7   6   -8.10   45.60
  -7   9  -6 -105.99   74.09
   9  -2  -6  -10.30   53.69
   2   7   6   58.09   53.09
   7  -9   6  -94.39   78.09
  10  -3  -6   20.40   68.79
  -7  10  -6  144.79  100.79
   3   7   6   78.79   52.49
  10  -8  -6  -19.10   63.99
  -2  10  -6  -29.40   72.79
   8   2   6   68.89   48.40
   9  -8  -6   -6.70   63.19
  -1   9  -6  128.49   79.79
   8   1   6  150.38   56.99
   0   8  -6   80.89   64.39
   8  -8  -6   -6.10   63.29
   8   0   6   25.50   48.80
  -8   8   6   72.29   72.89
   1   7  -6   16.20   80.09
   1   7  -6  100.29   53.69
   7  -8  -6  -11.60   59.79
  -7   8   6   11.60   70.39
   8  -1   6  -40.50   42.40
   6  -8  -6  232.18   77.99
   2   6  -6  209.38   83.29
   2   6  -6  380.66   67.09
   8  -2   6  379.96   81.69
  -6   8   6  396.46   99.09
   3   5  -6  611.34   61.89
   3   5  -6  694.73  110.59
   5  -8  -6  603.84  103.49
   8  -3   6  578.14   94.69
  -5   8   6  704.53  114.19
   4   4  -6  145.59   71.19
   4   4  -6  270.47   49.60
   8  -4   6  232.48   71.69
  -4   8   6  278.87   84.19
   8  -4   6  279.47   72.09
   5   3  -6  163.38   43.30
   5   3  -6  120.89   71.29
  -3   8   6  132.89   64.19
   8  -5   6  198.88   71.19
   8  -5   6  178.48   69.19
  -8   6  -6  346.97  102.99
   6   2  -6  331.07   60.29
  -2   8   6  211.88   77.69
   8  -6   6  130.29   73.19
   8  -6   6  320.77   76.79
   7   1  -6  -16.10   39.90
  -8   7  -6  -23.10   70.39
   8  -7   6   38.50   66.59
  -1   8   6  -41.70   49.00
  -8   8  -6  207.38  101.49
   8   0  -6  220.38   67.99
   8  -8   6  467.65  109.39
   0   8   6  289.47   78.49
  -8   9  -6  135.79  105.19
   9  -1  -6  129.09   67.39
   8  -9   6  229.88  107.69
   1   8   6  231.88   76.19
  10  -2  -6    2.20   69.29
  -8  10  -6   53.09  102.49
   2   8   6   39.20   58.19
   0   9  -6   -7.10   59.39
   9  -9  -6   83.89   78.89
   0   9  -6  102.49   92.49
   9   0   6   51.09   58.29
   8  -9  -6   98.99   71.59
   1   8  -6   21.60   58.09
   1   8  -6   41.50   73.49
   9  -1   6   19.80   56.39
  -8   9   6 -133.39   73.69
   2   7  -6   60.19   49.30
   2   7  -6   29.70   63.39
   7  -9  -6   32.80   62.29
  -7   9   6   96.99   85.49
   9  -2   6   17.10   53.59
   3   6  -6    1.10   34.10
   3   6  -6  -40.20   55.29
  -6   9   6   76.29   85.79
   9  -3   6   34.40   56.99
   4   5  -6   42.70   69.39
   4   5  -6  -27.30   31.90
  -5   9   6  -28.00   68.59
   9  -4   6  -13.10   49.99
   9  -4   6   19.10   50.09
   5   4  -6   -8.70   35.50
   5   4  -6  -49.50   60.39
  -4   9   6   17.10   69.39
   9  -5   6  -91.09   57.69
   9  -5   6  -12.60   52.79
   6   3  -6   31.50   36.30
   9  -6   6  -70.99   54.19
  -3   9   6   40.30   70.79
   7   2  -6  -13.20   37.20
   9  -7   6  -29.00   63.89
  -2   9   6 -149.59   50.99
   8   1  -6   53.09   60.69
   9  -8   6   34.20   77.59
  -1   9   6   -4.60   65.89
  -9   9  -6  126.99  104.19
   9   0  -6   50.79   61.59
   0   9   6  -73.59   62.89
   9  -9   6  -60.69   77.19
   2   8  -6  -13.00   53.79
   2   8  -6  103.69   88.19
  10  -2   6  -29.50   51.99
  -8  10   6   15.50   92.69
   3   7  -6   -1.50   42.00
   3   7  -6  -77.19   60.19
  -7  10   6  171.78   99.69
  10  -3   6  -46.10   53.59
   4   6  -6   75.49   42.60
   4   6  -6   78.49   87.49
  -6  10   6 -115.39   80.89
  10  -4   6   11.00   68.39
   5   5  -6   37.60   78.89
   5   5  -6   51.09   41.20
  10  -5   6   93.69   75.99
  -5  10   6   51.79   90.19
   6   4  -6 -107.89   65.99
   6   4  -6   37.30   38.90
  -4  10   6    1.30   84.39
  10  -6   6   19.60   70.49
   7   3  -6   90.69   45.90
  10  -7   6   -8.60   71.89
  -3  10   6   72.29   88.69
   8   2  -6   77.39   56.29
  -2  10   6  -43.60   70.19
  10  -8   6  159.58   89.39
   0   0  -7  413.76   55.49
   0   0   7  549.65   68.19
   0   0   7  452.25   55.49
   0   1  -7  542.45   58.69
   1  -1  -7  469.65   58.99
  -1   0  -7  590.34   62.59
   1   0   7  608.44   61.69
  -1   1   7  541.45   60.49
   0  -1   7  573.24   59.09
   1   0   7  558.44   66.09
  -1   1   7  513.15   65.09
   0  -1  -7  200.78   44.20
  -1   1  -7  104.19   40.40
   1   0  -7  147.89   40.30
   0   1   7  209.48   45.30
   1  -1   7  160.88   38.80
  -1   0   7  139.39   36.20
   0   1   7   92.79   41.40
  -1   2  -7  636.54   66.39
   2  -1  -7  522.95   62.19
  -1   2  -7  577.24   50.59
  -1  -1  -7  623.84   59.89
   1   1   7  690.33   61.79
   1  -2   7  509.55   59.89
  -2   1   7  595.64   64.39
   1   1   7  554.34   70.89
  -2   1   7  670.93   66.79
   3  -2  -7   93.09   40.60
  -1   3  -7   42.70   37.30
  -1   3  -7   87.19   38.70
  -2  -1  -7   81.19   33.60
   2   1   7   16.70   30.00
   1  -3   7   52.19   33.20
  -3   2   7  -14.00   33.20
   2   1   7   13.20   40.90
  -3   2   7   74.99   31.50
  -2   0  -7  784.32   66.29
   0   2  -7  889.51   68.49
   0   2  -7  752.62   64.89
   2  -2  -7  882.21   76.09
   2   0   7  874.51   70.39
  -2   2   7  790.92   70.79
  -2   2   7  841.02   66.39
   2   0   7  831.52   77.39
   0  -2   7  958.00   68.29
   1  -2  -7  928.31   75.69
   1   1  -7  909.11   69.59
  -2   1  -7 1056.49   75.49
  -1  -1   7  919.81   62.39
  -1   2   7  884.91   71.89
   2  -1   7  874.41   69.99
  -1   2   7  945.21   73.79
   2  -1   7  822.22   83.99
   2   0  -7   27.30   32.40
  -2   2  -7  159.88   43.30
  -2   2  -7   68.69   23.70
   0  -2  -7   97.39   38.20
  -2   0   7  165.48   40.80
   2  -2   7  134.59   41.10
   0   2   7  113.89   34.40
  -1  -2  -7  105.89   36.90
  -2   3  -7  129.99   46.60
   3  -1  -7   47.00   38.70
   2  -3   7  122.09   43.00
  -3   1   7   79.79   34.50
   1   2   7   55.59   29.60
  -2   4  -7  322.57   60.79
   4  -2  -7  337.07   61.59
  -2  -2  -7  303.67   48.40
   2  -4   7  356.26   60.89
  -4   2   7  307.27   43.80
   2   2   7  298.17   47.50
  -4   2   7  257.07   52.39
   2   2   7  328.57   52.69
   5  -3  -7  137.69   49.10
  -3  -2  -7  130.49   35.20
  -2   5  -7  119.69   53.79
  -5   3   7   23.30   40.10
   3   2   7  154.88   38.50
   2  -5   7  155.28   47.90
  -1   4  -7    5.70   37.10
   4  -3  -7   43.50   42.10
  -3  -1  -7    2.50   25.90
   3   1   7  -26.10   24.90
   1  -4   7   48.80   32.10
   3   1   7  -14.60   20.50
  -4   3   7   -3.30   36.50
   0   3  -7  449.56   67.09
   0   3  -7  523.55   64.69
   3  -3  -7  436.96   69.39
  -3   0  -7  462.45   57.19
   3   0   7  427.46   32.00
   0  -3   7  414.26   53.19
   3   0   7  390.96   58.09
   3   0   7  399.66   74.89
  -3   3   7  502.25   66.79
   1   2  -7   -1.90   25.10
   1   2  -7   44.10   32.20
   1   2  -7   54.49   41.40
  -3   1  -7   75.89   39.10
   2  -3  -7   94.89   42.10
   3  -1   7   77.89   39.00
   3  -1   7   47.00   48.10
  -2   3   7   52.99   34.40
  -1  -2   7   10.80   28.10
  -3   2  -7  106.69   46.80
   2   1  -7  149.79   36.10
   2   1  -7  177.28   41.90
   1  -3  -7  238.78   49.40
   3  -2   7  109.09   43.80
  -1   3   7  165.18   44.00
  -2  -1   7  141.39   35.20
   3   0  -7 1197.18   75.39
   0  -3  -7 1048.90   76.19
   3   0  -7 1047.70   74.39
   3  -3   7 1097.69   85.69
   0   3   7 1028.70   77.49
  -3   0   7 1035.70   67.99
  -3   4  -7  188.58   57.39
   4  -1  -7   93.79   43.90
  -1  -3  -7  189.18   42.20
   1   3   7  103.19   35.00
  -4   1   7  177.48   44.70
   1   3   7   95.49   38.70
   3  -4   7  179.88   47.40
  -3   5  -7   28.10   47.90
   5  -2  -7   13.20   36.90
  -2  -3  -7   30.30   26.30
  -5   2   7   14.10   21.20
  -5   2   7   25.40   35.80
   2   3   7  -11.50   28.20
   3  -5   7  -34.70   32.90
  -3   6  -7   65.99   51.89
   6  -3  -7   43.20   50.09
  -6   3   7  -29.60   34.90
   3  -6   7  -30.20   34.00
   3   3   7    7.80   27.90
   3   3   7   53.79   33.60
  -3   7  -7  169.68   69.69
   7  -4  -7   27.00   56.79
   4   3   7  225.68   65.29
  -7   4   7   55.19   47.30
   3  -7   7   72.69   78.89
   4   3   7  234.88   50.89
  -2   6  -7   75.29   50.99
   6  -4  -7  135.19   59.89
   4   2   7  134.99   48.20
   4   2   7   68.49   31.80
   2  -6   7  128.39   48.00
  -6   4   7   58.79   48.10
   4   2   7  145.49   40.70
  -4  -1  -7   39.30   28.20
  -1   5  -7  190.88   53.49
   5  -4  -7   49.60   49.90
   4   1   7  109.09   38.40
  -5   4   7  132.09   52.49
   1  -5   7  109.19   38.80
   4   1   7  143.99   40.80
   0   4  -7 1555.04   92.39
   0   4  -7 1310.77  102.09
   4  -4  -7 1372.06  106.19
  -4   0  -7 1504.35   81.99
   0   4  -7 1574.94   95.79
  -4   4   7 1487.85  106.39
   4   0   7 1505.25  108.89
   4   0   7 1509.75   92.19
   4   0   7 1178.58   57.39
   0  -4   7 1424.86   79.29
   4   0   7 1446.26   87.29
   1   3  -7   69.09   33.70
  -4   1  -7  -26.80   31.30
   1   3  -7   -4.80   40.10
   1   3  -7   34.50   27.50
   3  -4  -7  101.89   48.80
  -1  -3   7   18.10   27.30
   4  -1   7   96.09   39.40
  -3   4   7   -4.30   36.60
   4  -1   7   20.70   44.70
  -4   2  -7  288.97   55.69
   2   2  -7  228.18   42.90
   2   2  -7  209.48   56.29
   2  -4  -7  283.67   55.89
  -2  -2   7  130.19   33.00
   4  -2   7  204.48   49.99
   4  -2   7  262.67   67.29
  -2   4   7  268.97   54.69
   1  -4  -7 2199.78  109.19
   3   1  -7 2027.30   94.29
  -4   3  -7 2032.60  118.49
   4  -3   7 2338.57  122.19
  -3  -1   7 2075.19   85.49
  -1   4   7 2123.39  110.89
   4   0  -7   31.70   31.30
   4   0  -7   91.99   37.10
  -4   4  -7   99.19   55.49
   0  -4  -7   34.30   33.30
   4  -4   7   13.40   41.50
   0   4   7   38.10   33.20
  -4   0   7   62.09   31.80
   5  -1  -7   65.79   35.80
  -4   5  -7  145.79   60.39
  -1  -4  -7   88.19   33.80
   4  -5   7  115.29   48.40
   1   4   7   55.09   35.30
   1   4   7   82.99   37.80
  -5   1   7   62.79   35.40
   6  -2  -7   29.30   42.30
  -4   6  -7   30.60   55.19
   2   4   7   42.70   34.70
  -6   2   7   36.90   37.20
   4  -6   7    3.30   44.50
  -6   2   7  -20.10   19.00
  -4   7  -7   44.60   62.39
   7  -3  -7   64.39   54.19
   4  -7   7   54.29   49.00
   3   4   7   57.99   37.50
   8  -4  -7   25.10   57.39
  -4   8  -7  168.08   83.79
   4   4   7  120.29   46.50
   9  -5  -7   74.19   66.79
  -4   9  -7  -24.20   79.89
   5   4   7   20.20   38.20
   5   4   7  -19.30   71.19
  -3   8  -7   94.39   73.59
   8  -5  -7   55.19   61.29
   5   3   7   64.39   43.90
   5   3   7  152.58   67.29
   7  -5  -7  379.76   81.09
  -2   7  -7  376.26   78.89
  -7   5   7  330.47   76.89
   5   2   7  408.46   72.49
   5   2   7  440.26   69.29
  -1   6  -7  -72.89   38.40
   6  -5  -7  -21.50   45.60
   5   1   7  -20.30   30.40
   5   1   7   17.20   35.80
  -6   5   7  -14.00   48.70
   5  -5  -7   62.69   49.50
   0   5  -7   66.59   39.30
   0   5  -7   68.49   57.09
  -5   0  -7   72.49   34.40
   0   5  -7  115.69   47.80
  -5   5   7   79.49   52.59
   5   0   7  130.39   47.30
   5   0   7   92.29   36.60
   0  -5   7   39.60   31.20
   1   4  -7  648.14   68.09
   1   4  -7  565.74   82.99
   4  -5  -7  475.25   81.09
  -5   1  -7  519.05   66.79
  -1  -4   7  600.34   58.39
   5  -1   7  570.24   80.89
   5  -1   7  639.84   73.19
  -4   5   7  634.24   86.29
   2   3  -7   88.49   34.50
  -5   2  -7   80.99   42.10
   2   3  -7   65.99   48.10
   3  -5  -7    1.20   39.70
  -3   5   7   18.30   37.80
   5  -2   7   55.19   39.10
   5  -2   7   68.29   47.60
   3   2  -7  173.58   57.59
  -5   3  -7  210.38   58.79
   3   2  -7  186.28   42.00
   2  -5  -7   97.99   48.60
   3   2  -7  203.68   38.30
  -2   5   7  178.78   51.09
   5  -3   7  145.09   59.49
   5  -3   7  150.98   53.49
   1  -5  -7  193.68   49.30
  -5   4  -7  125.19   53.59
   4   1  -7  304.57   51.79
   5  -4   7  142.29   55.39
  -1   5   7  264.47   56.09
   0  -5  -7  -11.90   31.90
   5   0  -7   15.20   36.10
  -5   5  -7  -47.60   46.20
   5  -5   7   32.20   46.10
   0   5   7   37.10   36.70
   6  -1  -7   55.89   43.50
  -5   6  -7  138.59   66.79
   5  -6   7  260.77   74.19
   1   5   7  124.59   44.40
  -5   7  -7  310.77   85.29
   7  -2  -7  256.87   65.89
   2   5   7  269.17   58.29
   5  -7   7  187.68   70.79
   8  -3  -7  119.39   64.59
  -5   8  -7   84.79   78.59
   3   5   7   29.80   40.70
   5  -8   7  103.89   82.89
   9  -4  -7  -27.30   52.19
  -5   9  -7   61.29   87.19
   4   5   7   14.00   44.10
  10  -5  -7  136.79   79.49
  -5  10  -7  -23.00   91.29
   5   5   7   37.00   49.00
   5   5   7   49.80   82.19
  -4  10  -7  136.49  104.79
  10  -6  -7   56.79   76.19
   6   4   7   40.80   44.80
   6   4   7   94.69   80.19
  -3   9  -7   29.40   78.59
   9  -6  -7   37.20   66.69
   6   3   7   89.19   47.40
   6   3   7  122.29   80.49
  -2   8  -7  -96.09   49.00
   8  -6  -7   83.59   67.49
   6   2   7  -27.30   33.40
   6   2   7   22.20   57.59
   7  -6  -7  -14.70   55.89
  -1   7  -7   18.70   49.90
   6   1   7   61.19   46.00
  -7   6   7   17.50   53.39
   6   1   7    3.50   37.00
   6  -6  -7  150.78   60.89
   0   6  -7   31.90   55.59
   0   6  -7   74.79   48.80
  -6   6   7  179.98   68.19
   6   0   7  141.39   52.29
   1   5  -7   -1.20   48.00
   1   5  -7  -86.69   31.00
   5  -6  -7  -28.20   43.30
   6  -1   7   19.50   38.00
  -5   6   7   -6.70   46.90
   2   4  -7   49.90   30.70
   2   4  -7   91.29   36.60
   2   4  -7   54.29   50.89
   4  -6  -7    4.90   40.50
  -6   2  -7  -12.30   37.50
   6  -2   7   22.50   41.10
  -4   6   7   75.09   47.30
   6  -2   7   21.90   41.30
   3   3  -7  391.26   50.19
  -6   3  -7  366.66   68.79
   3  -6  -7  359.76   69.19
   3   3  -7  374.16   56.19
   3   3  -7  282.47   75.09
   6  -3   7  457.95   81.59
  -3   6   7  410.66   79.99
   6  -3   7  586.24   83.99
  -6   4  -7    7.50   45.40
   4   2  -7  -39.00   22.40
   4   2  -7  -18.10   30.10
   2  -6  -7  -26.40   39.80
   6  -4   7  -46.80   38.80
  -2   6   7   -6.80   38.50
   6  -4   7   15.80   52.99
  -6   5  -7   16.90   54.89
   5   1  -7   82.49   41.10
  -1   6   7   43.00   41.90
   6  -5   7  113.19   56.99
  -6   6  -7  271.87   87.29
   6   0  -7  254.97   57.89
   0   6   7  227.18   61.79
   6  -6   7  227.48   70.89
   7  -1  -7   83.49   52.59
  -6   7  -7  -19.90   62.09
   6  -7   7  -25.00   55.59
  -6   8  -7  141.99   91.69
   8  -2  -7  183.28   73.19
   2   6   7  293.07   62.99
   6  -8   7  304.87   91.39
  -6   9  -7   18.10   86.99
   9  -3  -7   45.60   64.29
   3   6   7  174.48   56.79
  10  -4  -7   43.60   67.69
  -6  10  -7   12.00   97.69
   4   6   7   14.50   48.80
   4   6   7   25.20   88.59
  10  -7  -7  125.59   84.29
  -3  10  -7  261.17  107.49
   7   3   7  268.77  153.08
   7   3   7  158.98   57.89
   9  -7  -7  -71.19   59.49
  -2   9  -7   13.70   67.79
   7   2   7   70.79   45.40
   7   2   7  114.39   82.29
   8  -7  -7   66.59   65.89
  -1   8  -7   52.49   60.69
   7   1   7   26.00   44.90
  -8   7   7   42.00   70.69
   0   7  -7  606.94  111.29
   7  -7  -7  303.07   87.89
   0   7  -7  249.88   70.39
   7   0   7  307.87   72.39
  -7   7   7  494.75  101.39
   1   6  -7   64.39   64.89
   6  -7  -7   74.79   58.49
   1   6  -7   29.10   42.60
   7  -1   7  -19.00   43.10
  -6   7   7 -109.89   52.09
   2   5  -7   77.39   66.69
   2   5  -7   28.30   34.50
   5  -7  -7  191.88   68.09
   7  -2   7  -71.09   33.80
  -5   7   7   24.90   57.79
   7  -2   7   52.69   53.49
   4  -7  -7  640.84   94.39
   3   4  -7  688.33  110.79
   3   4  -7  532.65   66.39
   7  -3   7  655.33   90.39
   7  -3   7  585.14   90.49
  -4   7   7  711.33  103.59
  -7   4  -7   51.39   56.59
   4   3  -7   13.00   36.30
   4   3  -7   70.79   62.99
   3  -7  -7   59.29   45.30
  -3   7   7   -4.40   44.70
   7  -4   7   46.70   60.59
   7  -4   7   -8.00   45.00
   5   2  -7  -15.00   32.00
  -7   5  -7   80.29   60.79
  -2   7   7  -41.70   40.40
   7  -5   7  122.09   71.59
   7  -5   7  113.29   60.99
  -7   6  -7  112.39   72.79
   6   1  -7   58.99   45.00
   7  -6   7  257.77   76.09
  -1   7   7   41.70   53.59
  -7   7  -7  178.88   84.49
   7   0  -7  128.19   54.99
   7  -7   7  128.19   71.79
   0   7   7   83.59   57.39
  -7   8  -7  476.05  117.49
   8  -1  -7  181.38   69.69
   1   7   7  312.97   75.99
   7  -8   7  292.67   95.09
  -7   9  -7  185.98  107.69
   9  -2  -7  -29.30   57.29
   2   7   7  123.49   64.79
  10  -3  -7  -49.10   59.69
  -7  10  -7 -102.69  103.99
   3   7   7    2.10   50.19
  10  -8  -7  -26.40   70.29
  -2  10  -7   61.89   75.69
   8   2   7  106.79   56.89
  -1   9  -7   -5.00   68.49
   9  -8  -7  -51.29   65.09
   8   1   7   -3.70   44.60
   0   8  -7  -24.10   74.19
   8  -8  -7   24.10   68.59
   0   8  -7   30.90   57.79
  -8   8   7  170.48   86.39
   8   0   7   62.69   57.99
   7  -8  -7  273.57   84.89
   1   7  -7  588.24  116.69
   1   7  -7  293.87   73.19
   8  -1   7  601.14   96.49
  -7   8   7  199.28   79.99
   6  -8  -7   57.89   59.39
   2   6  -7  -37.70   36.00
   2   6  -7  -34.60   59.19
  -6   8   7   19.90   72.09
   8  -2   7   13.60   49.40
   5  -8  -7   51.49   64.39
   3   5  -7  221.48   54.29
   3   5  -7  241.98   82.19
  -5   8   7  262.37   86.59
   8  -3   7  198.98   65.79
   8  -3   7  246.38   73.39
   4   4  -7  589.34  115.69
   4   4  -7  616.44   66.99
  -4   8   7  674.33  113.69
   8  -4   7  729.83  107.69
   8  -4   7  614.24   86.59
   5   3  -7   14.40   71.59
   5   3  -7   19.30   39.10
   8  -5   7   95.89   64.79
   8  -5   7   51.99   62.29
  -3   8   7  140.39   68.99
   6   2  -7  221.88   52.09
  -8   6  -7  280.27   93.99
   8  -6   7  185.18   79.79
  -2   8   7  266.97   73.19
   8  -6   7   94.09   71.59
  -8   7  -7  -35.30   78.09
   7   1  -7  123.49   55.39
  -1   8   7  133.49   68.09
   8  -7   7  154.98   82.19
  -8   8  -7    0.40   87.49
   8   0  -7  -23.20   47.30
   8  -8   7  -33.60   70.79
   0   8   7   66.29   62.59
  -8   9  -7   -7.40  101.49
   9  -1  -7   10.90   61.19
   8  -9   7    4.50   77.09
   1   8   7   61.99   62.29
  10  -2  -7  131.09   79.79
  -8  10  -7  107.19  113.99
   2   8   7   82.39   64.79
   0   9  -7  106.59   73.49
   9  -9  -7   59.79   72.39
   0   9  -7  142.79   99.59
   9   0   7   30.20   54.79
   1   8  -7   90.99   64.49
   8  -9  -7   75.89   75.29
   1   8  -7  -19.00   67.89
  -8   9   7   22.70   79.49
   9  -1   7   24.30   57.39
   2   7  -7   64.49   53.09
   2   7  -7  253.77   91.49
   7  -9  -7  248.88   81.99
  -7   9   7   68.69   85.49
   9  -2   7   98.09   64.39
   3   6  -7   26.60   60.89
   3   6  -7    3.40   38.20
   9  -3   7  -22.20   54.19
  -6   9   7  -84.89   72.49
   4   5  -7  -50.49   57.99
   4   5  -7   21.40   41.20
   9  -4   7   40.20   53.29
  -5   9   7   56.49   80.09
   9  -4   7   -1.20   54.39
   5   4  -7   58.89   41.30
   5   4  -7   48.80   64.99
   9  -5   7   51.59   56.39
  -4   9   7    7.70   72.59
   9  -5   7    3.90   62.29
   6   3  -7  119.49   47.70
   9  -6   7   95.79   76.69
   9  -6   7   35.20   80.49
  -3   9   7   63.99   67.69
   7   2  -7   40.70   42.90
   9  -7   7  -77.89   65.69
  -2   9   7    9.30   59.89
   9  -7   7  -44.20   70.29
   8   1  -7  202.58   65.89
  -1   9   7  215.48   84.09
   9  -8   7   63.19   86.09
   9   0  -7   46.80   65.39
  -9   9  -7  266.17  122.19
   9  -9   7  172.78   96.79
   0   9   7  164.78   81.29
   2   8  -7  -27.20   73.19
   2   8  -7   12.70   57.49
  -8  10   7  113.89  106.99
  10  -2   7    3.70   60.39
   3   7  -7  -26.90   67.09
   3   7  -7  182.58   56.49
  10  -3   7   33.70   66.09
  -7  10   7  134.49  105.69
   4   6  -7  -33.60   40.70
   4   6  -7  -57.39   69.89
  10  -4   7  -32.90   64.59
  -6  10   7  -21.00   90.39
   5   5  -7  -39.40   68.49
   5   5  -7  -16.80   42.60
  -5  10   7 -110.29   81.19
  10  -5   7  -61.19   56.39
   6   4  -7    2.20   41.90
   6   4  -7  176.58   92.19
  10  -6   7  -51.69   64.19
  -4  10   7    5.70   80.59
   7   3  -7  -12.60   43.90
  10  -7   7  -30.60   69.39
  -3  10   7   77.69   86.49
   8   2  -7  -24.50   46.70
  -2  10   7   75.89   88.59
  10  -8   7   19.20   76.79
   0   0  -8  420.96   60.39
   0   0   8  497.85   72.69
   0   0   8  413.66   60.69
   1  -1  -8 1971.50   99.19
  -1   0  -8 1839.62   95.89
   0   1  -8 1832.92   95.89
   0  -1   8 1986.10   94.79
   1   0   8 1874.81  111.09
  -1   1   8 1781.42   92.29
  -1   1   8 1937.21  102.09
   1   0   8 1690.83   93.19
   1   0  -8 1203.08   80.59
  -1   1  -8 1145.19   80.79
   0  -1  -8 1223.18   81.39
   0   1   8 1105.39   79.79
   0   1   8 1227.28   91.09
   1  -1   8 1418.66   84.59
  -1   0   8 1272.77   79.19
   2  -1  -8  446.76   64.29
  -1   2  -8  476.75   63.69
  -1   2  -8  397.56   49.60
  -1  -1  -8  484.75   58.79
  -2   1   8  440.96   64.49
   1   1   8  506.15   73.99
   1   1   8  431.26   59.59
   1  -2   8  394.66   60.49
  -2   1   8  468.05   63.29
  -2  -1  -8 1158.78   75.59
   3  -2  -8 1198.88   91.59
  -1   3  -8 1155.48   78.49
  -1   3  -8 1406.36   94.59
   1  -3   8 1398.26   87.49
  -3   2   8 1345.57   81.19
  -3   2   8 1342.97   89.09
   2   1   8 1434.56   88.89
   2   1   8 1294.57  101.39
   0   2  -8  -13.30   30.30
   0   2  -8  -26.70   32.30
  -2   0  -8  -45.20   28.40
   2  -2  -8    7.90   34.80
  -2   2   8   49.70   37.80
  -2   2   8    2.00   33.20
   2   0   8   -6.70   43.40
   2   0   8    4.60   33.40
   0  -2   8    9.70   30.50
  -2   1  -8  122.89   42.80
   1  -2  -8  145.99   46.50
   1   1  -8  133.59   41.40
   2  -1   8  129.09   57.09
  -1   2   8   73.79   37.20
  -1  -1   8   41.70   32.00
  -1   2   8   99.39   43.60
   2  -1   8   85.69   40.10
   2   0  -8 1376.76   85.79
  -2   2  -8 1516.05   94.69
   0  -2  -8 1657.83   91.39
  -2   0   8 1403.06   84.79
   2  -2   8 1380.26   88.89
   0   2   8 1413.16   87.99
   0   2   8 1378.06   98.89
  -2   3  -8  631.54   57.39
  -1  -2  -8  629.24   64.99
   3  -1  -8  597.24   68.69
  -2   3  -8  662.43   76.19
   2  -3   8  616.44   69.49
   1   2   8  777.42   70.19
  -2  -2  -8  300.37   51.89
  -2   4  -8  306.57   63.49
   4  -2  -8  269.77   58.29
  -4   2   8  418.16   53.39
  -4   2   8  324.37   60.29
   2   2   8  259.57   51.49
   2  -4   8  381.46   63.59
   2   2   8  307.37   53.49
  -3  -2  -8   -9.50   28.00
  -2   5  -8  -29.40   42.50
   5  -3  -8  -62.19   37.10
  -5   3   8   38.50   41.70
   3   2   8   58.09   28.80
   3   2   8   31.60   33.00
   2  -5   8   36.30   42.10
  -1   4  -8  -51.09   39.00
  -1   4  -8  -13.60   38.50
   4  -3  -8  -24.90   35.00
  -3  -1  -8    4.90   26.40
  -4   3   8   -4.50   35.90
   3   1   8    9.60   32.20
   3   1   8   20.30   31.50
   1  -4   8   17.70   31.80
  -3   0  -8   14.80   35.40
   0   3  -8   14.50   33.40
   0   3  -8   38.10   41.40
   3  -3  -8   36.00   40.60
   0  -3   8   82.69   34.50
   3   0   8   46.60   37.20
   3   0   8   57.69   18.20
  -3   3   8   31.00   40.10
   3   0   8   21.30   42.60
   2  -3  -8   -6.60   40.70
   1   2  -8   45.50   35.70
  -3   1  -8   17.10   32.60
   1   2  -8  -20.80   35.90
   3  -1   8  -34.40   50.19
   3  -1   8   -7.90   33.20
  -1  -2   8   58.59   33.20
  -2   3   8   59.89   39.80
   2   1  -8  120.09   42.70
   1  -3  -8  101.09   43.40
  -3   2  -8  223.98   51.89
  -2  -1   8  160.18   41.10
  -1   3   8  151.48   45.00
   3  -2   8  123.19   44.20
  -3   3  -8  121.39   49.10
   3   0  -8  217.38   50.49
   0  -3  -8  327.77   56.39
   3  -3   8  225.98   57.49
   0   3   8  242.88   51.49
  -3   0   8  283.87   48.70
  -3   4  -8  100.69   52.09
  -1  -3  -8   89.79   37.30
   4  -1  -8  119.09   42.70
   3  -4   8   90.59   45.20
  -4   1   8  129.99   42.00
   1   3   8   98.29   40.20
  -2  -3  -8    1.50   28.50
  -3   5  -8  -44.00   45.50
   5  -2  -8  -11.50   35.50
   2   3   8   20.60   32.90
  -5   2   8    9.70   25.70
   2   3   8    5.30   28.20
  -5   2   8  -14.60   34.50
   3  -5   8   18.00   38.30
  -3   6  -8  141.29   62.09
   6  -3  -8  114.99   52.29
   3  -6   8   83.89   49.10
  -6   3   8   20.10   44.80
   3   3   8  166.38   46.10
  -3   7  -8  126.69   68.19
   7  -4  -8  129.99   68.09
  -7   4   8  107.89   88.09
   4   3   8  155.38   47.70
   6  -4  -8   79.89   53.49
  -2   6  -8   29.30   50.49
   2  -6   8   49.20   41.30
  -6   4   8  140.89   55.19
   4   2   8   71.69   38.70
   4   2   8   91.89   47.40
  -1   5  -8    5.50   44.20
  -1   5  -8   21.00   49.10
  -4  -1  -8   12.30   26.70
   5  -4  -8   21.30   39.80
   4   1   8   54.99   28.30
   1  -5   8   25.00   30.40
  -5   4   8   64.29   44.80
   4   1   8   31.90   35.40
   4   1   8  -25.80   25.40
   0   4  -8  665.83   83.39
   0   4  -8  784.82   78.09
   4  -4  -8  782.32   88.09
  -4   0  -8  582.54   64.69
   4   0   8  727.83   74.39
   0  -4   8  792.62   67.59
  -4   4   8  724.93   84.99
   4   0   8  691.23   85.79
   4   0   8  561.74   40.50
   1   3  -8  757.12   82.79
   1   3  -8  591.14   68.39
   3  -4  -8  758.12   85.69
  -4   1  -8  656.53   71.59
   1   3  -8  676.03   63.89
  -3   4   8  730.83   81.49
   4  -1   8  689.73   75.59
   4  -1   8  625.94   85.59
  -1  -3   8  637.04   60.49
   2   2  -8   23.70   30.10
   2  -4  -8  -31.80   31.60
  -4   2  -8  -37.20   35.10
   2   2  -8    0.20   22.60
   2   2  -8  -20.50   36.10
   4  -2   8   30.60   53.19
   4  -2   8   10.10   35.40
  -2  -2   8   49.30   30.80
   3   1  -8  808.92   67.79
  -4   3  -8 1024.20   91.39
   3   1  -8  870.21   73.09
   1  -4  -8  924.51   82.59
  -1   4   8  839.82   81.69
   4  -3   8 1065.59   90.49
  -4   4  -8  363.06   74.79
   0  -4  -8  115.59   43.10
   4   0  -8  140.99   43.80
   4   0  -8  161.68   43.70
  -4   0   8  197.88   43.20
   4  -4   8  178.08   55.19
   0   4   8  204.88   48.70
  -1  -4  -8   -0.80   29.60
  -4   5  -8  -12.20   47.10
   5  -1  -8   62.29   41.70
   1   4   8    1.60   32.00
  -5   1   8   -6.80   31.80
   4  -5   8   -6.00   41.10
   1   4   8  -44.80   28.10
   6  -2  -8  545.35   79.89
  -4   6  -8  677.73  102.19
  -6   2   8  541.95   46.70
   4  -6   8  827.22   95.79
   2   4   8  638.14   73.29
  -6   2   8  674.83   76.79
   7  -3  -8  -14.50   47.70
  -4   7  -8  -16.70   58.99
   3   4   8   38.40   37.40
   4  -7   8   -6.90   43.50
  -4   8  -8   -4.80   67.29
   8  -4  -8    4.90   55.79
   4   4   8   37.60   39.80
   9  -5  -8   75.39   73.19
  -4   9  -8  188.78   89.69
   5   4   8  -11.10   40.00
   5   4   8   93.39   73.09
  -3   8  -8  -67.59   58.69
   8  -5  -8   53.19   60.89
   5   3   8   -0.90   38.90
   5   3   8   34.50   58.89
  -2   7  -8  115.49   66.19
   7  -5  -8   74.59   60.89
  -7   5   8  110.29   62.99
   5   2   8   56.29   47.80
   5   2   8  125.19   45.00
  -1   6  -8  347.37   78.39
   6  -5  -8  477.65   90.59
   5   1   8  457.55   69.59
   5   1   8  402.76   61.59
  -6   5   8  495.75   90.89
  -5   0  -8   32.60   39.60
   0   5  -8  -65.99   44.70
   0   5  -8   86.89   49.60
   5  -5  -8  -40.10   43.90
   5   0   8   34.40   39.60
  -5   5   8   22.00   47.20
   0  -5   8   24.90   37.90
   1   4  -8   13.60   30.60
   1   4  -8  -33.40   40.20
   4  -5  -8  -27.00   36.40
   1   4  -8   43.70   37.40
  -5   1  -8  -26.50   29.40
  -4   5   8   34.90   47.60
   5  -1   8    0.40   45.00
   5  -1   8   10.50   38.60
  -1  -4   8  -23.30   25.30
   3  -5  -8 1354.16  106.49
   2   3  -8 1138.59   83.59
  -5   2  -8 1171.88   90.69
   2   3  -8 1303.77  112.69
   5  -2   8 1256.97   97.69
  -3   5   8 1141.99  102.89
   5  -2   8 1126.49  105.09
   2  -5  -8  501.15   74.39
  -5   3  -8  425.46   76.89
   3   2  -8  445.56   62.79
   5  -3   8  501.65   78.79
  -2   5   8  432.56   73.79
   5  -3   8  483.15   85.89
   4   1  -8  -49.10   30.00
   1  -5  -8    3.30   34.70
  -5   4  -8   38.10   52.19
   5  -4   8   40.50   41.40
  -5   5  -8   89.49   58.59
   5   0  -8   31.80   39.20
   0  -5  -8   59.69   40.80
   5  -5   8  127.49   59.79
   0   5   8  -18.30   34.30
  -5   6  -8  216.08   78.49
   6  -1  -8   63.79   45.40
   5  -6   8  100.69   58.69
   1   5   8   85.69   46.10
  -5   7  -8  -46.60   64.49
   7  -2  -8   -4.50   44.80
   2   5   8   37.50   41.70
   5  -7   8   95.99   63.49
  -5   8  -8   24.50   76.09
   8  -3  -8  112.09   69.29
   3   5   8  161.88   55.79
   9  -4  -8  125.09   71.69
  -5   9  -8  276.07  105.69
   4   5   8  117.59   56.69
  10  -5  -8  -48.70   58.29
  -5  10  -8  -97.59   95.09
   5   5   8  -66.09   75.79
   5   5   8   -4.00   44.70
  10  -6  -8  116.59   80.79
  -4  10  -8  -90.59   87.29
   6   4   8   42.90   84.19
   6   4   8    0.30   44.60
   9  -6  -8   30.70   64.09
  -3   9  -8    7.30   75.39
   6   3   8   -0.50   40.40
   6   3   8  119.39   75.89
   8  -6  -8  125.89   79.99
  -2   8  -8   34.60   59.69
   6   2   8  -16.20   53.09
   6   2   8   72.69   51.49
   7  -6  -8   60.39   55.59
  -1   7  -8   74.39   54.69
  -7   6   8  -14.80   61.29
   6   1   8   16.80   41.90
   6   1   8   89.99   46.60
   0   6  -8  127.39   55.59
   0   6  -8  231.38   78.09
   6  -6  -8  224.48   75.19
   6   0   8  140.79   52.29
  -6   6   8  157.18   67.29
   5  -6  -8  -52.89   48.70
   1   5  -8  -38.00   48.40
   1   5  -8   -8.80   36.00
   6  -1   8   31.50   40.50
  -5   6   8  -41.00   43.70
   2   4  -8    3.10   52.69
   4  -6  -8   96.29   53.79
  -6   2  -8   66.99   42.70
   2   4  -8   -9.80   35.70
   6  -2   8  120.49   52.19
   6  -2   8   54.69   49.20
  -4   6   8  -10.20   48.80
   3   3  -8  136.69   66.29
   3   3  -8   99.39   38.40
  -6   3  -8  109.69   52.89
   3  -6  -8  116.89   54.99
  -3   6   8  157.28   59.99
   6  -3   8   90.39   60.59
   6  -3   8  203.88   60.29
   2  -6  -8  -15.70   36.50
   4   2  -8   27.00   35.80
  -6   4  -8  -30.70   49.50
   6  -4   8  -21.10   52.39
  -2   6   8  -12.40   38.80
   6  -4   8   48.20   51.39
   5   1  -8   61.29   42.30
  -6   5  -8    1.90   53.29
   6  -5   8   43.60   48.30
  -1   6   8   32.50   42.80
  -6   6  -8  349.07   94.19
   6   0  -8  293.27   63.19
   0   6   8  274.57   67.79
   6  -6   8  464.15   91.69
   7  -1  -8  165.38   62.29
  -6   7  -8  196.48   88.49
   1   6   8  196.68   59.29
   6  -7   8  313.47   83.09
   8  -2  -8  106.39   63.79
  -6   8  -8   56.09   86.79
   2   6   8  206.98   58.39
   6  -8   8   90.99   69.39
  -6   9  -8  -39.20   91.49
   9  -3  -8   51.29   69.69
   3   6   8   72.29   53.99
  -6  10  -8  152.48  104.79
  10  -4  -8   34.50   69.39
   4   6   8  202.58   68.99
  -3  10  -8  -75.79   79.79
  10  -7  -8  132.79   84.99
   7   3   8  113.69   58.49
  -2   9  -8  130.19   80.39
   9  -7  -8  133.79   74.09
   7   2   8  300.67   70.99
  -1   8  -8  -48.30   54.29
   8  -7  -8  -55.99   52.09
   7   1   8   32.40   45.20
  -8   7   8    5.00   65.09
   7  -7  -8  200.48   83.29
   0   7  -8  449.56  106.39
   0   7  -8  370.56   79.69
  -7   7   8  411.36  100.19
   7   0   8  335.17   76.19
   1   6  -8   79.29   54.79
   6  -7  -8   72.09   64.29
   1   6  -8   70.79   64.09
  -6   7   8   91.79   74.59
   7  -1   8   25.40   46.10
   5  -7  -8  101.79   63.99
   2   5  -8   37.80   61.19
   2   5  -8   46.80   37.00
   7  -2   8   88.19   52.59
   7  -2   8  -69.59   44.30
  -5   7   8  -87.89   48.10
   3   4  -8  299.77   87.29
   4  -7  -8  266.17   74.29
   3   4  -8  235.18   51.09
   7  -3   8  312.27   80.19
   7  -3   8  400.96   83.09
  -4   7   8  490.75   97.19
   3  -7  -8  153.48   76.19
   4   3  -8   32.80   58.19
  -7   4  -8  127.89   65.39
   4   3  -8  215.88   50.89
   7  -4   8   18.30   51.69
  -3   7   8   79.19   64.79
   7  -4   8  242.38   85.19
  -7   5  -8   -1.00   63.29
   5   2  -8   -2.60   36.20
  -2   7   8  -68.59   41.20
   7  -5   8  -18.00   47.20
   7  -5   8   36.00   67.29
  -7   6  -8  533.65  110.49
   6   1  -8  348.67   70.19
  -1   7   8  323.47   78.89
   7  -6   8  334.07   90.89
  -7   7  -8  269.17   95.99
   7   0  -8  181.88   61.29
   0   7   8  228.98   67.79
   7  -7   8  194.78   82.49
  -7   8  -8  109.29   95.59
   8  -1  -8   71.59   60.29
   7  -8   8  236.88   89.79
   1   7   8  163.98   66.29
   9  -2  -8   33.90   64.39
  -7   9  -8  276.87  117.29
   2   7   8   -4.00   56.29
  10  -3  -8   38.50   69.69
  -7  10  -8  176.78  118.99
   3   7   8   84.69   68.69
  10  -8  -8  166.08   93.49
  -2  10  -8  -73.69   68.69
   8   2   8  153.78   62.69
  -1   9  -8  524.15  131.39
   9  -8  -8  556.64  119.49
  -1   9  -8  447.06  101.39
   8   1   8  378.66   80.09
   0   8  -8   79.89   67.59
   8  -8  -8   -6.50   70.19
   0   8  -8  -25.40   75.39
  -8   8   8  123.99   81.69
   8   0   8   33.80   55.39
   1   7  -8   79.69   56.39
   1   7  -8   26.20   69.29
   7  -8  -8  278.87   89.59
  -7   8   8  114.29   85.59
   8  -1   8  130.59   60.49
   6  -8  -8  631.04  113.69
   2   6  -8  504.55  109.29
   2   6  -8  470.55   76.59
  -6   8   8  362.46   99.29
   8  -2   8  616.24  100.89
   3   5  -8   53.99   65.29
   5  -8  -8  218.18   76.29
   3   5  -8   49.00   44.40
  -5   8   8  160.18   83.49
   8  -3   8  112.99   63.49
   8  -3   8   98.19   58.79
   4   4  -8   75.89   47.70
   4   4  -8   36.80   61.79
  -4   8   8   70.89   72.69
   8  -4   8   32.30   58.69
   8  -4   8   77.69   60.49
   5   3  -8  606.34   75.29
   8  -5   8  473.35  101.09
  -3   8   8  963.10  121.69
   8  -5   8  591.94  108.69
   6   2  -8  117.99   51.69
  -2   8   8  217.58   80.29
   8  -6   8   15.50   72.39
   8  -6   8   50.19   66.59
   7   1  -8   11.60   45.80
  -8   7  -8  -98.49   67.49
  -1   8   8  -30.30   58.19
   8  -7   8  -14.50   62.99
  -8   8  -8  447.06  118.89
   8   0  -8  630.94  100.69
   8  -8   8  577.24  118.69
   0   8   8  281.97   81.79
   9  -1  -8   41.90   67.29
  -8   9  -8  258.47  118.09
   1   8   8  121.89   75.59
   8  -9   8   79.19   87.19
  -8  10  -8 -121.89   93.19
  10  -2  -8   36.90   67.39
   2   8   8  -40.10   62.09
   0   9  -8  -34.10   62.59
   0   9  -8   88.69   87.59
   9  -9  -8   31.70   73.59
   9   0   8   47.90   57.29
   1   8  -8   37.60   85.69
   1   8  -8  -11.40   59.99
   8  -9  -8  111.79   79.69
   9  -1   8   27.40   54.39
  -8   9   8  183.08   93.49
   2   7  -8   54.59   78.79
   2   7  -8   27.60   46.50
  -7   9   8   88.29   95.39
   9  -2   8   73.79   62.09
   3   6  -8   16.70   67.89
   3   6  -8   61.09   47.90
  -6   9   8   65.89   83.89
   9  -3   8  -38.10   52.59
   4   5  -8  105.69   82.99
   4   5  -8   48.50   46.60
   9  -4   8  -44.90   49.50
  -5   9   8    0.60   82.99
   9  -4   8  -26.40   58.29
   5   4  -8  120.39   54.79
   5   4  -8   -2.50   68.19
   9  -5   8   53.29   71.99
  -4   9   8  130.39   86.39
   9  -5   8   -6.70   62.89
   6   3  -8  167.88   53.99
  -3   9   8  298.87   94.69
   9  -6   8  100.89   78.79
   9  -6   8  139.99   73.09
   7   2  -8   57.89   53.69
  -2   9   8  -62.19   61.49
   9  -7   8   61.39   74.59
   9  -7   8   82.39   83.29
   8   1  -8   80.09   57.69
   9  -8   8   -4.40   71.99
  -1   9   8  -23.30   63.99
   9   0  -8  123.49   72.19
   0   9   8  101.99   73.89
   9  -9   8  203.18   96.79
   2   8  -8   68.89   62.09
   2   8  -8    0.40   76.69
  -8  10   8   99.89   95.59
  10  -2   8  -22.40   60.89
   3   7  -8  131.49   53.79
   3   7  -8  148.49   83.99
  10  -3   8  156.08   79.29
  -7  10   8  182.08  113.79
   4   6  -8   48.40   51.69
   4   6  -8    2.20   72.79
  10  -4   8  162.88   83.49
  -6  10   8  184.68  112.09
   5   5  -8  -67.99   68.79
   5   5  -8   -4.60   42.60
  10  -5   8  -57.29   59.39
  -5  10   8  -97.09   77.99
   6   4  -8  139.19   50.99
  10  -6   8  177.38   88.79
  -4  10   8  218.68  100.39
   7   3  -8  -37.50   44.40
  10  -7   8   -5.90   72.89
  -3  10   8    2.80   85.39
   8   2  -8  -49.40   49.20
  -2  10   8  -89.99   73.09
  10  -8   8  -63.59   75.49
   0   0  -9  891.51   76.99
   0   0   9  713.03   87.59
   0   0   9  872.71   78.59
  -1   0  -9  143.39   49.00
   0   1  -9  113.49   44.80
   1  -1  -9   96.99   47.10
  -1   1   9  201.28   49.40
   1   0   9  142.59   60.79
   1   0   9  115.29   41.30
   0  -1   9  189.08   45.50
  -1   1   9  197.88   56.89
   0  -1  -9  595.54   69.29
   1   0  -9  773.82   75.09
  -1   1  -9  700.13   74.59
  -1   0   9  487.55   61.89
   0   1   9  637.04   71.19
   0   1   9  700.33   84.79
   1  -1   9  539.15   66.69
   2  -1  -9 1266.27   90.89
  -1  -1  -9 1113.29   81.69
  -1   2  -9 1131.99   88.49
  -2   1   9 1340.17  100.69
  -2   1   9 1200.68   87.69
   1   1   9 1218.68   85.39
   1   1   9 1091.99  100.99
   1  -2   9  963.00   78.89
  -2  -1  -9  197.08   44.30
  -1   3  -9  201.18   56.29
  -1   3  -9  128.19   42.60
   3  -2  -9  188.58   55.69
  -3   2   9  219.28   49.20
   2   1   9  214.98   63.29
   1  -3   9  165.78   48.20
   2   1   9  178.28   49.10
  -3   2   9  209.58   49.20
  -2   0  -9 1880.41  102.89
   0   2  -9 1999.70  110.79
   2  -2  -9 1977.80  110.19
   2   0   9 1946.31  105.39
  -2   2   9 1933.31  106.29
   2   0   9 1876.31  124.59
   0  -2   9 1796.92   98.99
  -2   2   9 2042.80  112.09
   1   1  -9   74.89   41.70
  -2   1  -9   66.29   44.40
   1  -2  -9   65.69   41.20
  -1  -1   9   25.20   30.00
  -1   2   9   18.90   34.30
   2  -1   9   28.80   38.30
  -1   2   9   20.60   42.90
   2  -1   9  189.18   64.79
  -2   2  -9 1009.30   87.49
   0  -2  -9 1074.19   83.39
   2   0  -9 1143.69   85.29
   0   2   9  846.82   88.79
   2  -2   9  941.71   83.79
   0   2   9  872.91   77.59
  -2   0   9  987.20   79.09
  -2   3  -9  955.10   62.99
  -1  -2  -9  886.71   74.49
  -2   3  -9  831.82   89.09
   3  -1  -9  990.80   85.39
  -3   1   9  988.30   80.09
   2  -3   9  938.91   83.29
   1   2   9  814.02   76.49
   4  -2  -9  229.18   57.59
  -2   4  -9  208.08   60.49
  -2  -2  -9  260.47   49.90
  -2   4  -9  222.48   53.79
   2  -4   9  288.47   61.09
  -4   2   9  213.28   55.69
   2   2   9  169.28   45.80
  -4   2   9  226.78   47.50
  -2   5  -9  303.97   74.29
  -3  -2  -9  362.46   56.89
   5  -3  -9  377.96   70.99
  -2   5  -9  332.77   71.49
   3   2   9  331.77   62.09
   3   2   9  266.87   54.79
   2  -5   9  356.86   66.19
  -5   3   9  299.37   66.09
   4  -3  -9   27.50   42.40
  -1   4  -9  -41.10   38.30
  -1   4  -9   19.60   41.00
  -3  -1  -9   -5.50   30.40
  -4   3   9  -12.00   40.80
   1  -4   9  -40.30   32.20
   3   1   9   13.20   32.00
  -3   0  -9  226.58   52.89
   0   3  -9  354.76   64.99
   3  -3  -9  238.48   58.89
   0   3  -9  242.18   51.99
   3   0   9  270.77   25.70
  -3   3   9  355.06   62.89
   0  -3   9  319.87   56.19
   3   0   9  199.38   52.79
   3   0   9  263.97   75.39
  -3   1  -9   43.10   37.70
   1   2  -9   28.60   36.00
   2  -3  -9  -69.49   35.30
   3  -1   9  -33.40   50.49
  -2   3   9   67.99   40.30
   3  -1   9  -26.20   31.00
  -1  -2   9  -18.30   28.20
   2   1  -9   70.09   38.00
   1  -3  -9  125.29   47.10
  -3   2  -9  147.29   50.39
   3  -2   9  143.49   49.00
  -2  -1   9   57.89   37.30
  -1   3   9  133.69   44.30
  -3   3  -9   93.29   27.40
   0  -3  -9   35.30   38.40
   3   0  -9  193.08   49.99
  -3   3  -9   95.69   46.30
   3  -3   9   70.59   45.30
   0   3   9   77.39   39.70
  -3   0   9  141.79   41.40
   4  -1  -9   58.89   43.20
  -3   4  -9  118.09   56.59
  -1  -3  -9   73.09   40.60
  -4   1   9  131.79   44.00
   3  -4   9  111.69   46.50
   1   3   9  120.79   43.60
  -3   5  -9  495.45   90.09
  -2  -3  -9  463.35   61.49
   5  -2  -9  442.66   76.79
   2   3   9  427.96   67.79
  -5   2   9  374.46   53.09
   3  -5   9  438.66   75.09
  -5   2   9  421.26   70.29
  -3   6  -9   67.19   57.39
   6  -3  -9   34.90   48.10
  -6   3   9   50.09   45.80
   3  -6   9  106.59   51.89
   3   3   9   56.69   38.10
  -3   7  -9   -4.30   57.59
   7  -4  -9   19.80   55.59
   4   3   9  -27.60   33.30
   6  -4  -9  650.73   98.59
  -2   6  -9  886.11  106.09
   2  -6   9  914.71   91.69
  -6   4   9  880.41   98.79
   4   2   9  822.02   81.39
   4   2   9  838.52   77.09
  -1   5  -9   53.19   52.79
  -1   5  -9    3.40   45.20
  -4  -1  -9  -14.30   27.10
   5  -4  -9   54.19   45.80
  -5   4   9   52.69   44.30
   4   1   9    8.50   35.20
   1  -5   9   36.80   40.50
   4   1   9  -12.80   27.30
  -4   0  -9  -35.40   32.70
   0   4  -9   -1.50   38.50
   0   4  -9  -19.10   40.00
   4  -4  -9   61.49   47.30
   4   0   9   37.80   35.90
   4   0   9   46.10   48.20
   4   0   9    1.60   15.90
  -4   4   9  -43.70   41.20
   0  -4   9    6.70   32.10
  -4   1  -9  151.28   45.80
   1   3  -9  280.37   57.99
   1   3  -9  213.18   60.59
   3  -4  -9  215.58   60.09
   4  -1   9  345.67   63.79
  -3   4   9  251.97   61.69
  -1  -3   9  268.47   49.20
   4  -1   9  153.18   63.09
  -4   2  -9  -37.20   36.40
   2   2  -9  -11.10   28.90
   2   2  -9   -5.20   32.40
   2  -4  -9   26.80   42.00
  -2  -2   9   35.80   32.80
  -2   4   9   10.20   34.10
   4  -2   9   39.40   53.99
   4  -2   9   46.80   40.90
   3   1  -9   86.59   41.20
   3   1  -9   -1.40   31.30
   1  -4  -9  -39.80   32.10
  -4   3  -9  -45.20   39.40
   4  -3   9   13.30   41.50
  -1   4   9   11.20   35.70
  -3  -1   9   58.39   32.60
  -4   4  -9  133.29   63.49
   0  -4  -9  176.48   48.90
   4   0  -9   44.30   39.00
   4  -4   9  160.78   55.89
   0   4   9   56.69   39.20
  -4   0   9   48.00   35.70
  -4   5  -9   -8.30   53.69
  -1  -4  -9   -2.30   35.00
   5  -1  -9  -37.10   36.40
   1   4   9  -12.60   34.50
  -5   1   9  -63.29   30.00
   4  -5   9  -29.40   43.80
  -4   6  -9  612.74   99.09
   6  -2  -9  654.03   86.09
   2   4   9  471.05   72.49
  -6   2   9  651.23   69.69
   4  -6   9  801.82   95.99
   7  -3  -9  -33.10   46.60
  -4   7  -9   54.49   67.19
   3   4   9   76.09   44.20
   4  -7   9   59.79   57.69
   8  -4  -9   16.10   60.29
  -4   8  -9  -22.50   71.59
   4   4   9   37.10   44.70
  -4   9  -9   92.79   96.79
   9  -5  -9   17.20   60.79
   5   4   9   29.50   44.70
   5   4   9  -72.49   65.29
   8  -5  -9   88.59   66.29
  -3   8  -9  174.78   86.89
   5   3   9  160.18   55.49
   5   3   9   68.99   61.49
  -2   7  -9  181.48   73.59
   7  -5  -9  268.17   84.49
  -7   5   9  206.88   69.69
   5   2   9  257.27   58.79
   5   2   9  336.97   66.89
   6  -5  -9  248.78   71.79
  -1   6  -9  181.88   65.49
  -1   6  -9   64.49   65.99
   5   1   9  148.09   44.70
   5   1   9  181.38   52.29
  -6   5   9  274.87   74.39
   5  -5  -9  202.48   64.09
   0   5  -9  220.08   60.59
   0   5  -9  396.96   84.89
   5   0   9  307.97   63.19
  -5   5   9  358.46   73.59
   1   4  -9    0.20   35.60
  -5   1  -9   19.40   40.50
   1   4  -9   40.80   51.69
   4  -5  -9   47.00   52.59
  -4   5   9   82.29   54.09
   5  -1   9  101.69   60.89
   5  -1   9  107.09   48.80
  -1  -4   9   91.39   37.40
   2   3  -9  967.40  106.09
   2   3  -9 1015.60   80.79
   2   3  -9  864.81   73.39
  -5   2  -9  882.11   91.49
   3  -5  -9 1032.40  101.89
  -3   5   9  761.52   88.69
  -2  -3   9  903.41   70.29
   5  -2   9  870.41  103.49
   5  -2   9  894.81   92.99
   3   2  -9  628.84   83.39
   3   2  -9  691.03   74.69
   2  -5  -9  849.52   89.09
  -5   3  -9  988.70   97.69
  -3  -2   9  847.42   63.49
   5  -3   9  854.21  102.79
  -2   5   9  691.63   85.19
   5  -3   9  746.43   89.39
  -5   4  -9  240.78   71.69
   1  -5  -9  252.87   60.99
   4   1  -9  244.88   57.19
   5  -4   9  287.87   65.79
  -1   5   9  259.37   61.29
  -4  -1   9  207.38   66.59
   5   0  -9   70.99   42.50
  -5   5  -9   71.99   63.79
   5  -5   9  -16.00   47.80
   0   5   9   52.69   43.30
  -5   6  -9 1202.98  131.79
   6  -1  -9  927.91   97.29
   5  -6   9 1049.59  117.19
   1   5   9  999.30   96.29
  -5   7  -9  126.49   81.59
   7  -2  -9   20.40   50.89
   2   5   9   70.99   44.10
   5  -7   9  101.59   66.09
  -5   8  -9   79.39   88.39
   8  -3  -9    5.20   57.39
   3   5   9  114.69   51.89
   9  -4  -9  217.08   77.59
  -5   9  -9  255.17  112.59
   4   5   9  285.47   71.49
  10  -5  -9   74.39   78.99
  -5  10  -9  154.48  116.29
   5   5   9   37.30   52.09
   5   5   9   58.69   85.49
  10  -6  -9   33.40   75.49
  -4  10  -9   28.70  106.19
   6   4   9   12.50   48.00
  -3   9  -9  -43.50   75.69
   9  -6  -9   -7.00   63.49
   6   3   9   54.29   47.20
  -2   8  -9  119.69   69.39
   8  -6  -9  123.79   71.89
   6   2   9   54.39   44.80
  -1   7  -9  268.77   91.39
   7  -6  -9  175.98   75.39
  -1   7  -9   38.10   55.59
  -7   6   9  264.97   82.69
   6   1   9  136.79   53.09
   6  -6  -9   -0.30   51.69
   0   6  -9    8.60   48.70
   0   6  -9   -4.10   60.19
   6   0   9  -22.90   35.40
  -6   6   9  -15.50   57.39
   5  -6  -9   13.80   56.39
   1   5  -9   65.49   58.69
   1   5  -9   29.00   45.70
   6  -1   9   87.99   51.89
   6  -1   9   58.89   56.49
  -5   6   9   -0.20   53.99
   4  -6  -9   83.49   56.49
   2   4  -9  145.89   68.49
  -6   2  -9   22.80   55.39
   2   4  -9  100.59   46.20
   6  -2   9   69.99   49.80
  -4   6   9  113.69   61.29
   6  -2   9   34.20   57.69
   3   3  -9   74.49   59.29
  -6   3  -9    5.20   40.80
   3   3  -9   57.79   41.70
   3  -6  -9    5.60   46.80
   6  -3   9   15.90   44.10
  -3   6   9   19.50   48.50
   6  -3   9  -11.20   53.99
   2  -6  -9   -0.10   43.80
   4   2  -9   31.90   40.50
  -6   4  -9   -3.70   52.79
   6  -4   9    7.80   60.69
   6  -4   9   31.50   49.90
  -2   6   9  -75.69   31.70
  -6   5  -9  127.69   69.49
   5   1  -9   97.89   48.60
   6  -5   9   19.20   53.39
  -1   6   9   84.89   51.29
  -6   6  -9  411.16   98.99
   6   0  -9  223.28   61.19
   6  -6   9  327.17   85.49
  -6   7  -9  -39.00   72.79
   7  -1  -9   49.40   50.19
   1   6   9  -19.10   44.80
   6  -7   9   48.90   63.59
  -6   8  -9  225.28  106.59
   8  -2  -9  202.98   72.59
   2   6   9  101.99   56.59
   6  -8   9  227.78   83.89
   9  -3  -9  -12.70   67.99
  -6   9  -9  -16.60   91.09
   3   6   9  -33.10   40.90
  10  -4  -9   49.20   65.19
  -6  10  -9   51.39  107.29
   4   6   9  110.59   62.69
  -3  10  -9 -163.88   71.19
  10  -7  -9   52.69   74.39
   7   3   9  -12.70   48.40
   9  -7  -9  117.49   79.89
  -2   9  -9  245.08   94.59
   7   2   9  196.08   61.49
   8  -7  -9  191.98   88.09
  -1   8  -9  172.68   79.79
  -1   8  -9   65.69   89.19
   7   1   9  146.89   58.99
   0   7  -9   17.80   59.79
   7  -7  -9   10.80   61.69
   0   7  -9   75.09   76.09
  -7   7   9   58.59   73.09
   7   0   9  -13.70   42.70
   1   6  -9   75.79   52.19
   1   6  -9   58.79   71.99
   6  -7  -9   48.40   63.49
  -6   7   9    6.00   66.69
   7  -1   9  157.68   61.79
   2   5  -9  233.68   61.69
   2   5  -9  181.18   82.19
   5  -7  -9  109.49   63.39
   7  -2   9  233.98   75.59
   7  -2   9  210.48   67.09
  -5   7   9  174.88   73.89
   3   4  -9   66.19   63.19
   3   4  -9   -3.70   36.10
   4  -7  -9   10.30   49.10
   7  -3   9   23.90   50.59
   7  -3   9   15.30   55.09
  -4   7   9   52.49   66.09
   4   3  -9   70.19   45.40
  -7   4  -9   74.09   88.59
   4   3  -9  123.59   73.49
   7  -4   9   76.59   73.39
  -3   7   9  119.09   60.39
   7  -4   9  116.09   61.19
  -7   5  -9   26.80   66.39
   5   2  -9   -9.80   38.70
   7  -5   9 -112.39   57.99
   7  -5   9   68.09   57.19
  -2   7   9  -15.80   54.99
  -7   6  -9  117.29   79.39
   6   1  -9  -23.20   42.30
   7  -6   9   52.29   68.39
  -1   7   9   37.50   57.79
   7   0  -9   -0.30   44.30
  -7   7  -9  -14.10   76.29
   7  -7   9  122.19   70.89
   0   7   9   46.20   57.89
   8  -1  -9   51.19   57.99
  -7   8  -9   84.19   91.49
   7  -8   9   31.20   68.49
   1   7   9  -76.89   49.40
  -7   9  -9 -210.78   89.89
   9  -2  -9 -125.39   56.89
   2   7   9   57.69   60.09
  -7  10  -9  130.89  121.69
  10  -3  -9    7.60   61.59
   3   7   9    5.80   59.99
  -1   9  -9  169.48   85.49
   9  -8  -9   68.69   79.09
  -1   9  -9  129.39  100.39
   8   1   9   74.69   56.99
   0   8  -9   58.19   71.69
   8  -8  -9  135.29   79.59
   0   8  -9   41.70   76.99
   8   0   9   90.39   58.99
  -8   8   9   96.59   85.39
   1   7  -9  262.67   73.19
   7  -8  -9  198.88   77.09
   1   7  -9  449.76  114.89
   8  -1   9  189.78   69.39
  -7   8   9  192.78   90.79
   2   6  -9  178.78   82.89
   2   6  -9  159.08   59.49
   6  -8  -9  -28.80   58.89
  -6   8   9   -1.40   76.09
   8  -2   9  118.19   65.29
   3   5  -9  296.07   63.99
   3   5  -9   70.49   73.19
   8  -3   9  281.67   73.49
   8  -3   9  194.98   81.19
  -5   8   9  207.78   84.19
   4   4  -9  126.99   79.19
   4   4  -9  128.69   57.39
   8  -4   9   69.19   68.89
  -4   8   9  214.28   83.59
   8  -4   9   89.09   66.49
   5   3  -9  218.28   61.69
  -3   8   9  445.76  105.59
   8  -5   9  194.58   78.69
   8  -5   9  186.38   85.89
   6   2  -9  362.06   69.19
   8  -6   9  455.45   99.99
  -2   8   9  428.56   95.49
   8  -6   9  848.12  143.89
   7   1  -9  145.19   59.49
  -8   7  -9  228.48   98.79
  -1   8   9  385.56   93.99
   8  -7   9  321.67   98.29
   8   0  -9   78.19   61.69
  -8   8  -9   66.59   93.19
   0   8   9   62.29   64.59
   8  -8   9   17.10   73.39
   9  -1  -9  277.87   92.19
  -8   9  -9  345.17  123.69
   8  -9   9  445.66  190.38
   1   8   9  289.07   90.49
   0   9  -9  -85.39   63.29
   0   9  -9  -93.19   75.69
   9  -9  -9  -95.99   66.09
   9   0   9  -28.10   54.69
   1   8  -9   53.19   75.19
   8  -9  -9  -19.00   66.29
   1   8  -9   31.50   65.59
   9  -1   9   50.09   54.29
  -8   9   9    7.20   82.99
   2   7  -9   75.19   58.29
   2   7  -9  165.18   92.69
  -7   9   9   57.29   90.89
   9  -2   9   41.30   62.79
   3   6  -9  -49.99   41.60
   3   6  -9  -17.90   74.89
   9  -3   9    2.50   61.99
  -6   9   9   55.29   80.39
   4   5  -9   15.70   71.49
   4   5  -9   25.60   48.10
   9  -4   9   68.49   72.09
  -5   9   9  112.69   93.89
   9  -4   9  122.79   71.09
   5   4  -9   24.40   48.80
   5   4  -9  154.08   86.09
  -4   9   9   80.99   84.39
   9  -5   9   38.70   63.79
   9  -5   9   27.50   65.89
   6   3  -9    6.10   49.10
   9  -6   9  -40.00   68.79
  -3   9   9   72.99   84.99
   9  -6   9  -78.69   59.49
   7   2  -9   87.29   57.79
  -2   9   9   14.60   69.39
   9  -7   9   74.49   88.09
   9  -7   9   86.59   80.69
   8   1  -9   53.69   59.99
   9  -8   9   -1.50   79.39
  -1   9   9  170.18   94.49
   9   0  -9   52.59   74.19
   0   9   9   21.70   74.99
   9  -9   9   61.69   87.69
   3   7  -9  -79.89   65.89
   3   7  -9   17.40   52.99
  10  -3   9   85.79   67.79
  -7  10   9  -59.99   95.49
   4   6  -9   87.49   83.79
   4   6  -9  -32.50   47.80
  -6  10   9  106.69  106.29
  10  -4   9  -12.50   65.09
   5   5  -9  -63.59   45.20
   5   5  -9   31.40   79.19
  -5  10   9   -6.20   95.29
  10  -5   9   71.89   75.69
   6   4  -9   31.10   47.80
  10  -6   9   53.69   73.79
  -4  10   9    8.70   94.59
   7   3  -9   19.70   53.49
  10  -7   9   10.60   75.09
  -3  10   9   14.90   95.59
   0   0 -10   97.09   45.50
   0   0  10  147.09   44.90
   0   0  10  136.49   58.79
   1  -1 -10  242.78   55.49
  -1   0 -10  285.37   56.99
   0   1 -10  388.06   67.59
   1   0  10  259.27   54.39
  -1   1  10  237.18   63.49
   1   0  10  213.48   63.49
   0  -1  10  382.26   66.29
  -1   1  10  375.56   64.89
  -1   1 -10  236.58   56.89
   1   0 -10  257.97   57.89
   0  -1 -10  279.47   56.69
  -1   0  10  317.07   59.89
   1  -1  10  420.46   65.49
   0   1  10  346.37   70.89
   0   1  10  348.07   60.09
   2  -1 -10 1027.10   87.79
  -1  -1 -10 1006.20   81.79
  -1   2 -10 1007.40   96.19
   1   1  10 1052.09   96.89
   1   1  10 1014.30   86.39
   1  -2  10 1078.59   87.89
  -2   1  10 1241.68   92.69
  -2   1  10 1022.30   93.39
   3  -2 -10   -5.20   37.60
  -1   3 -10   14.60   36.60
  -1   3 -10  103.79   46.80
  -2  -1 -10    5.30   31.70
  -3   2  10   36.40   37.70
   1  -3  10   -8.90   33.80
   2   1  10   -4.90   48.80
   2   1  10   94.49   46.50
  -3   2  10   62.89   41.80
   2  -2 -10 1441.86  103.19
  -2   0 -10 1424.56   97.99
   0   2 -10 1605.24  104.19
   2   0  10 1477.15  100.49
  -2   2  10 1500.75   98.09
   0  -2  10 1413.26   93.29
   2   0  10 1505.65  121.39
  -2   2  10 1510.55  102.59
   1   1 -10   63.19   44.70
  -2   1 -10    5.70   40.80
   1  -2 -10   96.19   46.00
   2  -1  10   52.69   55.79
  -1  -1  10   53.19   35.50
   2  -1  10    6.70   36.10
  -1   2  10   10.20   35.40
  -1   2  10   53.69   44.50
  -2   2 -10   56.59   46.20
   2   0 -10  258.97   56.89
   0  -2 -10  218.68   58.09
   0   2  10  161.08   59.29
   2  -2  10  161.58   49.00
  -2   0  10  194.28   49.80
   0   2  10  165.88   53.09
   3  -1 -10  -19.30   35.80
  -1  -2 -10  -24.70   31.70
  -2   3 -10   35.50   42.60
  -2   3 -10   -1.00   30.20
  -3   1  10  137.49   50.99
   1   2  10   13.40   35.70
  -3   1  10   -3.70   35.90
   2  -3  10  -12.20   33.90
   1   2  10  -12.90   34.80
   4  -2 -10 1268.07  105.69
  -2  -2 -10 1208.38   85.29
  -2   4 -10 1329.77  110.69
  -2   4 -10 1224.68   86.69
  -4   2  10 1322.47   86.59
   2   2  10 1120.99   92.19
   2  -4  10 1585.34  107.19
  -4   2  10 1311.67   97.39
   5  -3 -10   27.00   47.70
  -3  -2 -10  -52.59   46.00
  -2   5 -10   36.00   52.89
  -2   5 -10  -39.40   40.80
  -5   3  10  -26.70   36.70
   2  -5  10   32.30   40.80
   3   2  10   55.69   38.00
  -1   4 -10  222.18   61.39
  -1   4 -10  106.79   51.09
   4  -3 -10  120.89   51.59
  -3  -1 -10   96.99   40.70
   3   1  10   97.79   43.10
  -4   3  10   71.19   46.50
   3   1  10  164.18   57.39
   1  -4  10  135.39   48.00
  -4   3  10  167.38   45.30
  -3   0 -10  393.36   65.89
   0   3 -10  266.67   60.09
   3  -3 -10  373.76   71.19
   0   3 -10  315.97   65.19
   3   0  10  264.07   61.19
   0  -3  10  362.16   61.69
   3   0  10  270.57   72.99
  -3   1 -10  -40.20   32.40
   2  -3 -10   56.89   45.70
   1   2 -10  -35.70   34.80
   3  -1  10   31.00   50.79
  -1  -2  10  -37.70   29.50
   3  -1  10   14.70   36.10
  -2   3  10   -9.20   32.40
   1  -3 -10  221.98   55.89
  -3   2 -10  172.08   58.29
   2   1 -10  223.38   51.99
   3  -2  10  116.19   48.10
  -1   3  10  197.08   52.89
  -2  -1  10  144.29   44.20
   3  -2  10  150.08   62.49
   3   0 -10  168.58   51.29
  -3   3 -10  161.18   30.50
   0  -3 -10  138.39   47.00
  -3   3 -10  157.88   59.19
   0   3  10  284.77   58.59
   3  -3  10  170.28   56.09
  -3   0  10  150.88   47.10
   4  -1 -10   40.70   39.10
  -1  -3 -10   22.50   37.90
  -3   4 -10    2.10   32.60
  -3   4 -10   34.70   54.59
  -4   1  10   83.09   43.10
   1   3  10  -43.80   29.30
   3  -4  10   29.10   46.70
  -3   5 -10 1947.01  140.49
  -2  -3 -10 1753.62  126.39
   5  -2 -10 1636.64  119.09
  -3   5 -10 1578.24  100.39
   3  -5  10 1730.03  121.49
   2   3  10 1905.71  114.99
  -5   2  10 1857.71  115.49
  -5   2  10 1767.52   92.69
  -3   6 -10  525.35  101.79
   6  -3 -10  330.97   78.99
   3   3  10  281.17   60.79
   3  -6  10  173.48   60.39
  -6   3  10  380.56   75.69
   7  -4 -10  -16.40   52.69
  -3   7 -10   57.49   69.29
   4   3  10   19.80   40.40
   6  -4 -10  150.18   57.79
  -2   6 -10   87.19   70.59
  -2   6 -10   45.70   63.09
   4   2  10  107.09   45.50
  -6   4  10   91.19   56.29
  -1   5 -10   90.69   53.99
  -1   5 -10   54.19   52.39
   5  -4 -10  115.09   57.89
  -5   4  10  137.49   62.29
   4   1  10   91.99   45.70
   1  -5  10  152.08   47.70
   4   1  10  133.09   37.80
   0   4 -10  231.48   65.69
  -4   0 -10  199.98   52.99
   4  -4 -10  191.48   61.79
   0   4 -10  134.99   48.80
   4   0  10  329.07   76.19
  -4   4  10  291.67   68.39
   4   0  10  157.68   50.89
   0  -4  10  137.99   48.50
   3  -4 -10  -25.80   36.00
   1   3 -10   28.00   45.90
  -4   1 -10   69.29   46.60
   1   3 -10  -34.90   37.60
  -3   4  10  108.19   52.59
  -1  -3  10  -68.79   25.20
   4  -1  10   77.29   45.20
   4  -1  10   13.50   54.69
   2   2 -10  274.77   61.69
   2  -4 -10  277.87   62.29
  -4   2 -10  353.16   72.69
  -2   4  10  293.27   62.69
   4  -2  10  271.87   65.49
   4  -2  10  481.35   88.79
  -2  -2  10  241.08   49.70
  -4   3 -10   -1.10   43.20
   3   1 -10  -24.60   36.20
   1  -4 -10  -35.60   36.10
  -1   4  10   85.49   45.60
  -3  -1  10   46.50   34.70
   4  -3  10  -20.80   41.20
  -4   4 -10   76.59   32.00
  -4   4 -10   20.30   50.09
   0  -4 -10  -17.20   35.10
   4   0 -10   12.50   40.50
   0   4  10   53.69   41.20
  -4   0  10   -0.60   33.30
   4  -4  10   14.40   43.00
  -4   5 -10  193.58   70.29
   5  -1 -10  121.39   51.69
  -5   1  10  230.68   61.39
   4  -5  10  117.89   58.19
   1   4  10  103.99   50.09
   6  -2 -10   67.49   51.99
  -4   6 -10  315.47   85.19
   4  -6  10  121.99   61.39
   2   4  10  172.08   55.09
   7  -3 -10  -71.89   43.20
  -4   7 -10  -44.80   65.09
   3   4  10  -15.00   38.30
   4  -7  10    9.70   76.59
  -4   8 -10  -78.19   72.49
   8  -4 -10  137.19   70.19
   4   4  10   64.99   46.50
   9  -5 -10   97.99   75.49
  -4   9 -10    3.60   83.19
   5   4  10  -35.90   42.30
   8  -5 -10  118.09   72.99
  -3   8 -10  533.55  110.99
   5   3  10  312.37  114.59
   5   3  10  158.58   56.79
  -2   7 -10  312.07   94.79
  -2   7 -10  282.67   84.39
   7  -5 -10  307.17   85.59
  -7   5  10  292.67   87.19
   5   2  10  180.78   55.49
   5   2  10  251.27  100.69
  -1   6 -10   90.99   64.89
  -1   6 -10  165.98   73.69
   6  -5 -10  250.57   80.49
  -6   5  10  151.28   63.99
   5   1  10  237.38   64.29
   5  -5 -10  128.69   59.59
   0   5 -10   24.70   45.50
   0   5 -10  -25.00   52.29
  -5   5  10    3.80   47.90
   5   0  10   57.59   45.60
   4  -5 -10  194.78   64.29
  -5   1 -10  257.47   61.09
   1   4 -10   49.10   56.59
   1   4 -10  138.19   54.79
   5  -1  10  151.88   56.19
  -4   5  10   93.59   56.69
   5  -1  10  225.38   70.29
  -5   2 -10    2.50   43.80
   3  -5 -10   -5.90   45.90
   2   3 -10  -24.90   34.40
   2   3 -10   14.70   51.39
   5  -2  10   -0.60   40.90
  -3   5  10   -3.30   44.90
   5  -2  10   32.90   61.79
   2  -5 -10  230.18   58.19
  -5   3 -10  193.48   65.29
   3   2 -10  114.49   49.70
   5  -3  10   69.59   68.69
   5  -3  10  136.79   57.89
   4   1 -10  190.18   55.69
   1  -5 -10  232.68   55.89
  -5   4 -10  114.79   64.09
  -1   5  10  175.18   58.89
   5  -4  10   45.70   51.99
   5   0 -10   40.60   41.50
  -5   5 -10  -11.10   57.69
   0   5  10   45.60   43.30
   5  -5  10  -64.29   42.20
  -5   6 -10    4.30   63.09
   6  -1 -10   15.30   47.20
   1   5  10   61.49   43.50
   5  -6  10  108.89   63.89
   7  -2 -10   42.20   55.89
  -5   7 -10   34.50   74.39
   5  -7  10   40.20   64.39
   2   5  10  -59.39   35.70
  -5   8 -10    3.40   80.99
   8  -3 -10  127.39   71.19
   3   5  10  -38.20   40.90
   9  -4 -10   95.59   78.89
  -5   9 -10  -22.50   92.79
   4   5  10   56.49   52.99
  -5  10 -10  -24.90   97.59
  10  -5 -10   67.59   76.19
   5   5  10  124.89   63.59
  10  -6 -10  -15.30   68.79
  -4  10 -10  -92.29   85.89
   6   4  10   15.50   50.19
  -3   9 -10  -33.70   76.29
   9  -6 -10  109.59   77.89
   6   3  10   94.99   52.49
  -2   8 -10   40.50   65.29
   8  -6 -10  -25.40   63.89
  -2   8 -10  -10.30   72.69
   6   2  10  -22.10   44.00
  -1   7 -10  132.09   69.69
  -1   7 -10  -84.09   54.89
   7  -6 -10  -14.10   55.69
  -7   6  10  -20.90   60.79
   6   1  10  -13.20   43.00
   0   6 -10  -37.00   46.60
   6  -6 -10  -59.29   50.99
   0   6 -10   41.20   67.19
   6   0  10   -2.80   43.00
  -6   6  10   22.70   55.99
   5  -6 -10    8.70   56.29
   1   5 -10   29.00   56.09
   1   5 -10   38.40   43.50
   6  -1  10   12.80   45.10
   6  -1  10  -81.49   48.50
  -5   6  10   32.20   57.79
   2   4 -10   49.50   58.79
   4  -6 -10   12.70   54.79
   2   4 -10   20.00   44.80
   6  -2  10   54.99   54.39
   6  -2  10  -42.60   60.69
  -4   6  10  -30.40   53.49
   3   3 -10   83.69   62.89
   3  -6 -10  171.88   64.69
  -6   3 -10  179.68   63.19
   3   3 -10   22.30   44.80
   6  -3  10  174.98   61.19
   6  -3  10  187.88   82.89
  -3   6  10   66.79   53.99
  -6   4 -10  -33.50   49.60
   2  -6 -10  -10.80   45.10
   4   2 -10   53.79   41.40
   6  -4  10   60.99   77.29
   6  -4  10   83.59   57.49
  -2   6  10   37.30   54.59
   5   1 -10  166.18   55.79
  -6   5 -10  218.68   80.49
  -1   6  10  119.99   59.39
   6  -5  10  217.88   74.89
  -6   6 -10  506.05  110.19
   6   0 -10  599.34   90.59
   6  -6  10  518.25  100.09
   0   6  10  516.15   85.89
  -6   7 -10   -8.90   80.09
   7  -1 -10   75.29   51.69
   6  -7  10  163.48   70.99
   1   6  10   66.79   50.29
  -6   8 -10   47.50   91.99
   8  -2 -10  234.88   77.49
   2   6  10  125.79   59.49
   9  -3 -10   63.09   69.79
  -6   9 -10  124.09  107.59
   3   6  10   36.90   54.19
  10  -4 -10   25.20   65.59
  -6  10 -10  -16.60  111.79
   4   6  10   91.09   64.39
  -2   9 -10  -38.90   70.19
  -2   9 -10  -18.00   82.09
   9  -7 -10  -14.70   62.89
   7   2  10   20.00   51.39
   8  -7 -10  -19.00   57.19
  -1   8 -10   50.59   76.59
  -1   8 -10  -62.19   62.89
   7   1  10  -10.50   45.80
   7  -7 -10   69.39   74.79
   0   7 -10  179.18   74.09
   0   7 -10  203.28   90.19
  -7   7  10   82.99   71.29
   7   0  10  200.78   65.39
   1   6 -10   81.59   68.29
   6  -7 -10   70.99   68.59
   1   6 -10  150.58   60.09
  -6   7  10  -19.60   64.59
   7  -1  10  -18.50   45.40
   2   5 -10  233.88   66.49
   2   5 -10  313.17   93.79
   5  -7 -10  408.06   88.99
   7  -2  10   95.09   57.19
   7  -2  10  330.97   85.99
  -5   7  10  357.66   92.69
   3   4 -10   40.00   66.29
   4  -7 -10  150.48   68.29
   3   4 -10   33.60   49.80
   7  -3  10  182.68   77.39
  -4   7  10  123.69   77.99
   7  -3  10  115.89   62.29
   4   3 -10   12.60   43.90
   7  -4  10    7.00   71.49
   7  -4  10   -2.10   51.99
  -3   7  10  -47.10   56.49
   5   2 -10   -4.80   42.70
  -7   5 -10  -56.89   61.69
  -2   7  10  -20.60   55.39
   7  -5  10   98.89   81.19
   7  -5  10   38.70   60.99
   6   1 -10   24.90   41.90
  -7   6 -10  137.19   90.19
   7  -6  10  182.88   72.49
  -1   7  10  195.28   70.79
  -7   7 -10   56.79   89.49
   7   0 -10   70.29   57.59
   0   7  10   31.50   60.59
   7  -7  10   95.09   68.59
  -7   8 -10   16.40   92.69
   8  -1 -10   35.20   54.79
   7  -8  10  -25.20   68.09
   1   7  10   30.70   54.19
  -7   9 -10  162.28  116.69
   9  -2 -10   56.49   68.99
   9  -8 -10 -111.89   55.89
  -1   9 -10  -12.20   77.39
  -1   9 -10  196.98  104.89
   8   1  10   67.99   55.49
   8  -8 -10   31.10   71.29
   0   8 -10  -62.29   59.49
   0   8 -10   33.10   81.59
  -8   8  10   53.49   75.39
   8   0  10   17.90   56.09
   7  -8 -10  107.99   74.89
   1   7 -10  127.29   86.69
   1   7 -10   75.99   63.09
   8  -1  10  122.89   63.99
  -7   8  10  213.18  104.19
   2   6 -10   11.30   72.69
   2   6 -10   98.29   62.29
   6  -8 -10  -38.20   59.99
   8  -2  10    1.40   51.29
  -6   8  10   15.20   81.49
   3   5 -10  -40.40   61.89
   3   5 -10   51.29   48.30
   8  -3  10  157.68   78.29
   8  -3  10  130.29   65.99
  -5   8  10  -66.19   66.29
   4   4 -10   40.90   74.59
   4   4 -10   98.19   53.69
   8  -4  10  -69.69   75.09
   8  -4  10    8.60   60.89
  -4   8  10  194.48   92.19
   5   3 -10  101.99   53.79
   8  -5  10  154.18   76.79
  -3   8  10   35.60   73.89
   8  -5  10   49.70   88.79
   6   2 -10  -19.90   45.20
   8  -6  10   57.49   73.69
   8  -6  10   78.19   90.49
  -2   8  10   62.59   65.89
   7   1 -10  107.49   60.79
  -8   7 -10  -44.60   81.89
  -1   8  10   30.00   62.49
   8  -7  10   80.69   75.79
   8   0 -10  126.69   72.99
  -8   8 -10   99.79   99.89
   0   8  10   92.59   79.99
   8  -8  10  116.79   84.59
  -8   9 -10   28.40  103.99
   9  -1 -10   28.10   66.39
   1   8  10  120.09   79.49
   8  -9 -10   41.80   74.99
   1   8 -10    8.10   81.69
   1   8 -10  -12.20   60.89
   9  -1  10    1.30   52.89
  -8   9  10  -11.60   84.69
   2   7 -10   80.99   75.99
   2   7 -10  -70.89   48.90
   9  -2  10  202.78   76.39
  -7   9  10   10.80   88.49
   3   6 -10  234.38   66.69
   3   6 -10   64.59   77.19
  -6   9  10  216.28  104.59
   9  -3  10  120.99   66.69
   4   5 -10    2.70   46.90
   4   5 -10   27.40   81.19
   9  -4  10  -12.80   60.09
  -5   9  10  -36.30   79.69
   9  -4  10  126.79   71.19
   5   4 -10  304.37   70.89
   9  -5  10  160.78   81.89
  -4   9  10  249.38  106.69
   9  -5  10  296.37   90.29
   6   3 -10  158.48   59.39
  -3   9  10  218.48   98.99
   9  -6  10  120.79   85.19
   9  -6  10  266.07   93.19
   7   2 -10   38.90   54.09
   9  -7  10  -62.49   80.19
  -2   9  10  -40.20   71.99
   9  -7  10   65.59   79.29
   8   1 -10   88.89   65.59
  -1   9  10  -18.10   79.09
   9  -8  10   54.09   84.39
   4   6 -10  -20.30   55.99
   4   6 -10   60.09   86.39
  10  -4  10  106.69   80.09
  -6  10  10  203.28  114.49
   5   5 -10  169.78  102.29
   5   5 -10   86.19   62.19
  -5  10  10  134.69  104.19
  10  -5  10  184.98   84.59
   6   4 -10  -10.10   50.69
  10  -6  10  -37.10   72.49
  -4  10  10    2.50   96.79
   0   0 -11   61.99   43.00
   0   0  11   31.60   37.90
   0   0  11   35.50   58.39
   1  -1 -11   16.90   38.00
   0   1 -11   99.19   48.80
  -1   0 -11   63.99   42.00
   1   0  11   21.60   53.09
   0  -1  11   58.49   40.20
  -1   1  11  124.69   48.80
   1   0  11  -16.80   35.40
  -1   1  11   54.59   58.29
  -1   1 -11    2.50   40.10
   1   0 -11   -8.60   36.20
   0  -1 -11   41.90   37.70
   0   1  11    2.20   38.20
   0   1  11    9.90   45.80
   1  -1  11   19.00   39.20
  -1   0  11   -0.60   32.40
  -1   2 -11  234.18   63.69
   2  -1 -11  244.98   57.99
  -1  -1 -11  188.88   50.99
   1   1  11  166.08   58.69
  -2   1  11  280.97   67.59
   1  -2  11  179.88   51.19
  -2   1  11  259.77   62.09
   1   1  11  267.37   56.19
   3  -2 -11  714.33   89.39
  -1   3 -11  607.44   83.09
  -2  -1 -11  612.64   74.29
  -1   3 -11  523.05   65.19
   2   1  11  714.93   89.89
  -3   2  11  569.34   82.09
  -3   2  11  689.43   81.19
   2   1  11  630.64   79.29
   1  -3  11  711.63   80.09
   2  -2 -11  -27.10   36.50
   0   2 -11   80.59   45.30
  -2   0 -11  -46.10   41.40
  -2   2  11  -22.80   37.10
  -2   2  11    5.40   41.70
   2   0  11   39.30   38.60
   2   0  11    9.80   52.79
   0  -2  11    1.90   37.00
  -2   1 -11  688.13   84.69
   1   1 -11  622.84   82.49
   1  -2 -11  446.46   72.69
  -1   2  11  680.73   80.59
  -1   2  11  492.15   78.29
   2  -1  11  619.64   75.39
  -1  -1  11  559.94   71.29
   2  -1  11  463.05   84.79
   2   0 -11 1461.65  105.49
  -2   2 -11 1427.76  112.29
   0  -2 -11 1495.95  104.09
  -2   0  11 1553.64  103.99
   2  -2  11 1634.04  109.09
   0   2  11 1392.66  112.19
   0   2  11 1395.06  103.99
   3  -1 -11  512.45   79.29
  -2   3 -11  416.56   79.09
  -1  -2 -11  456.75   70.39
   1   2  11  368.36   78.49
  -3   1  11  437.56   74.99
   1   2  11  541.55   77.79
   2  -3  11  442.26   78.19
  -3   1  11  316.67   72.19
   4  -2 -11  269.97   68.29
  -2   4 -11  256.67   68.39
  -2   4 -11  217.08   54.19
  -2  -2 -11  363.76   65.69
  -4   2  11  354.76   68.69
   2  -4  11  500.65   76.09
   2   2  11  290.87   63.89
  -4   2  11  321.07   62.79
  -2   5 -11  537.95   78.29
   5  -3 -11  676.33   94.49
  -2   5 -11  533.85   91.39
   3   2  11  664.93   82.99
  -5   3  11  586.94   87.39
  -5   3  11  585.14   64.19
   2  -5  11  569.84   81.49
   4  -3 -11   11.10   43.10
  -3  -1 -11   28.80   38.10
  -1   4 -11    5.60   41.30
  -1   4 -11   12.30   44.30
   3   1  11   19.90   49.40
  -4   3  11   31.10   36.00
  -4   3  11  -81.49   35.10
   3   1  11    9.70   34.50
   1  -4  11   16.40   36.80
   3  -3 -11  152.58   57.69
   0   3 -11  121.99   52.39
   0   3 -11   96.69   50.09
  -3   0 -11  244.38   57.19
   3   0  11  123.79   63.59
   0  -3  11  205.58   51.19
  -3   3  11  139.69   51.09
   3   0  11   68.19   44.50
  -3   3  11  111.39   45.00
   1   2 -11  172.48   55.59
  -3   1 -11  195.28   59.09
   2  -3 -11  203.68   60.09
   3  -1  11  257.77   83.19
   3  -1  11  163.78   57.99
  -1  -2  11  276.17   57.39
  -2   3  11  357.56   74.19
  -3   2 -11  101.99   54.39
   1  -3 -11  105.69   50.89
   2   1 -11   28.00   46.50
  -1   3  11   63.39   45.80
   3  -2  11  146.19   53.99
   3  -2  11  131.79   65.99
  -2  -1  11   63.89   41.30
   0  -3 -11  287.27   64.09
   3   0 -11  409.36   70.79
  -3   3 -11  405.36   76.19
  -3   0  11  423.96   68.69
   3  -3  11  293.37   70.39
   0   3  11  341.67   68.29
  -3   4 -11  544.15   88.89
  -1  -3 -11  680.83   80.39
  -3   4 -11  547.75   59.59
   4  -1 -11  713.83   86.99
   1   3  11  666.53   84.89
   3  -4  11  750.72   93.39
  -4   1  11  786.72   83.99
  -3   5 -11  277.67   62.99
  -3   5 -11  238.88   79.59
   5  -2 -11  191.78   60.59
   3  -5  11  154.68   58.49
  -5   2  11  182.68   49.20
  -5   2  11  242.18   60.89
   2   3  11  218.48   55.09
   6  -3 -11  252.87   67.99
  -3   6 -11  325.97   74.99
  -3   6 -11  345.07   90.59
   3   3  11  201.18   58.79
   3  -6  11  273.67   72.79
   7  -4 -11  105.49   71.19
  -3   7 -11   47.30   80.29
  -3   7 -11  -45.70   60.49
   4   3  11   24.70   45.50
   6  -4 -11  309.97   77.49
  -2   6 -11  369.06   91.89
  -2   6 -11  517.25   92.89
  -6   4  11  374.06   84.19
   4   2  11  249.58   64.39
  -1   5 -11  157.78   64.19
   5  -4 -11  133.99   63.69
  -1   5 -11  275.17   75.29
  -5   4  11  284.77   76.39
   4   1  11  256.57   48.00
   4   1  11  181.08   55.69
   0   4 -11  131.59   55.89
   4  -4 -11    9.10   49.20
   0   4 -11   17.00   50.69
  -4   0 -11    6.40   40.60
   0  -4  11   53.39   40.90
  -4   4  11    6.70   45.00
   4   0  11   29.50   55.99
   4   0  11   74.09   47.00
   3  -4 -11   31.40   46.70
   1   3 -11  -39.90   41.70
   1   3 -11   53.39   40.90
  -4   1 -11  -27.80   38.50
   4  -1  11  -38.60   54.99
   4  -1  11  -23.90   39.90
  -1  -3  11   25.30   36.20
   2   2 -11  289.27   62.89
   2  -4 -11   82.59   48.90
  -4   2 -11  375.66   72.39
   4  -2  11  211.68   74.69
  -2   4  11  249.38   63.09
  -2  -2  11  168.58   49.00
   4  -2  11  229.58   64.49
   1  -4 -11  125.49   49.70
  -4   3 -11   59.59   55.89
   3   1 -11   80.19   47.40
  -3  -1  11   78.49   43.70
   4  -3  11  -16.10   41.20
  -1   4  11    5.30   43.20
   0  -4 -11   44.80   43.00
  -4   4 -11  -32.50   24.90
   4   0 -11   23.90   42.50
  -4   4 -11  -45.50   51.49
   4  -4  11  -29.20   44.40
  -4   0  11   27.30   37.10
   0   4  11  -53.69   30.50
   5  -1 -11  218.08   67.39
  -4   5 -11  207.48   75.49
  -4   5 -11  276.57   55.99
   1   4  11  163.08   53.69
   4  -5  11  158.48   69.19
   6  -2 -11  398.06   80.09
  -4   6 -11  654.03  118.79
   4  -6  11  445.66   92.09
   2   4  11  617.04   86.09
  -4   7 -11  -17.40   75.49
   7  -3 -11   58.09   57.39
   3   4  11   13.00   49.99
  -4   8 -11  143.19   88.59
   8  -4 -11    3.50   62.69
   4   4  11   40.90   50.09
   9  -5 -11 -116.99   64.79
  -4   9 -11   -4.60   85.59
   5   4  11   95.29   55.19
   8  -5 -11   35.30   70.29
  -3   8 -11  232.78   97.19
  -3   8 -11  209.08   90.49
   5   3  11   71.79   46.60
  -2   7 -11  211.38   85.19
  -2   7 -11  168.88   78.69
   7  -5 -11  -10.10   52.39
   5   2  11   46.70   46.50
  -1   6 -11  445.16   96.39
   6  -5 -11  395.66   85.39
  -1   6 -11  284.27   79.79
  -6   5  11  417.86   90.99
   5   1  11  322.47   69.49
   0   5 -11   17.70   54.09
   0   5 -11  -12.20   45.60
   5  -5 -11    8.90   50.39
  -5   5  11  120.09   63.69
   5   0  11   27.50   65.19
   5   0  11   10.60   38.40
   1   4 -11  168.58   60.19
  -5   1 -11  197.28   92.19
   4  -5 -11   99.99   58.29
   1   4 -11  203.28   73.29
   5  -1  11  267.27   79.79
  -4   5  11  220.98   73.09
   5  -1  11   74.59   49.70
   2   3 -11   -6.60   40.00
   3  -5 -11   29.50   52.09
  -5   2 -11  -86.49   40.00
   5  -2  11   69.89   67.89
  -3   5  11   55.69   56.19
   5  -2  11   26.20   45.70
  -5   3 -11   28.60   52.39
   2  -5 -11  -10.90   46.30
   3   2 -11   76.69   49.00
   5  -3  11   44.40   66.89
   5  -3  11   16.30   49.60
  -5   4 -11   85.49   66.09
   1  -5 -11  131.29   55.89
   4   1 -11  123.19   54.69
   5  -4  11   98.79   59.99
  -1   5  11  127.09   56.89
   5   0 -11  -10.40   43.70
  -5   5 -11  -20.20   58.89
   5  -5  11  -90.59   44.80
   0   5  11   51.09   49.50
  -5   6 -11  387.06  102.99
   6  -1 -11  149.19   62.49
   1   5  11  196.88   63.69
   5  -6  11  364.76   90.29
  -5   7 -11  126.39   89.39
   7  -2 -11   28.40   48.70
   5  -7  11  158.38   78.79
   2   5  11   59.19   49.10
   8  -3 -11  108.89   65.09
  -5   8 -11   50.19   93.19
   3   5  11   32.60   51.29
   9  -4 -11  -33.90   68.59
  -5   9 -11   18.00  105.59
   4   5  11   19.30   53.59
   9  -6 -11   78.29   78.29
  -3   9 -11   88.39   98.49
  -3   9 -11  191.38  104.39
   6   3  11   39.20   53.09
   8  -6 -11   -5.50   64.79
  -2   8 -11  200.08   87.79
  -2   8 -11   59.89   82.09
   6   2  11    3.10   43.90
  -1   7 -11   -6.30   72.29
   7  -6 -11  -24.90   56.59
  -1   7 -11   17.80   62.79
   6   1  11   89.49   52.99
  -7   6  11  -58.79   60.69
   0   6 -11   -7.80   50.59
   0   6 -11  -46.10   49.80
   6  -6 -11   57.09   62.19
   6   0  11   86.89   52.09
  -6   6  11   15.40   60.89
   1   5 -11    4.10   51.39
   5  -6 -11    5.30   57.69
   1   5 -11   82.49   71.79
   6  -1  11  -15.40   47.00
  -5   6  11   31.50   59.09
   6  -1  11  -29.30   57.39
   4  -6 -11  -17.90   43.10
   2   4 -11   33.00   42.40
   2   4 -11  -20.40   60.29
  -4   6  11 -111.89   47.80
   6  -2  11   79.69   55.29
   6  -2  11  -31.60   63.49
  -6   3 -11    8.40   57.79
   3   3 -11   68.59   50.29
   3  -6 -11   -0.50   47.70
   6  -3  11 -100.09   57.49
   6  -3  11  -22.70   46.50
  -3   6  11   55.39   58.29
   4   2 -11   33.30   46.10
  -6   4 -11   14.50   62.29
  -2   6  11  -55.69   43.80
   6  -4  11   28.90   55.69
   6  -4  11  124.29   84.19
   5   1 -11   87.79   51.39
  -6   5 -11  129.39   75.19
   6  -5  11   71.09   61.79
   6   0 -11  -42.10   46.70
  -6   6 -11  -16.70   70.69
   0   6  11   79.79   52.29
   6  -6  11   13.70   60.09
   7  -1 -11   40.10   52.89
  -6   7 -11  105.99   99.39
   1   6  11  102.89   57.19
   6  -7  11   96.49   76.59
  -6   8 -11   15.00   86.09
   8  -2 -11   14.80   58.79
   2   6  11   90.49   54.49
   9  -3 -11  170.08   85.19
  -6   9 -11  526.95  135.59
   3   6  11  116.19   65.39
   9  -7 -11  -51.89   57.49
  -2   9 -11  -57.89   86.49
  -2   9 -11  -95.39   76.59
   7   2  11   57.79   52.39
   8  -7 -11  107.39   74.49
  -1   8 -11   99.69   82.69
  -1   8 -11  -49.10   67.69
   7   1  11   21.20   56.09
   7  -7 -11   39.20   68.29
   0   7 -11   96.19   80.99
   0   7 -11   68.69   64.29
   7   0  11  -18.20   50.09
  -7   7  11   19.70   69.29
   6  -7 -11   17.00   63.59
   1   6 -11  -27.20   46.60
   1   6 -11   52.39   70.19
  -6   7  11   38.30   66.99
   7  -1  11   12.30   50.89
   2   5 -11   43.50   49.30
   2   5 -11   42.30   70.69
   5  -7 -11   74.99   61.79
   7  -2  11   77.89   67.29
  -5   7  11  -39.30   56.49
   7  -2  11  131.49   65.79
   4  -7 -11   14.90   63.99
   3   4 -11   22.20   68.89
   3   4 -11   49.60   52.99
  -4   7  11   42.60   64.99
   7  -3  11   35.90   58.79
   7  -3  11   96.19   71.19
   4   3 -11  -14.20   44.40
   7  -4  11  105.09   59.99
  -3   7  11   92.59   72.19
   7  -4  11   77.89   81.69
   5   2 -11  186.28   62.29
  -7   5 -11  339.97   94.99
  -2   7  11  219.18   79.79
   7  -5  11  213.78   76.69
   7  -5  11   39.10   81.09
   6   1 -11  -25.20   42.10
  -7   6 -11   -1.40   75.69
   7  -6  11   -8.80   56.69
  -1   7  11   27.60   59.99
   7   0 -11  -66.09   44.10
  -7   7 -11 -130.29   70.99
   0   7  11  -64.89   55.89
   7  -7  11  -11.30   61.49
   8  -1 -11  -32.30   52.09
  -7   8 -11   41.10   93.99
   7  -8  11    9.10   73.49
  -7   9 -11  182.68  112.89
   9  -2 -11   80.39   73.59
  -1   9 -11   67.49   87.59
  -1   9 -11   41.00   91.39
   9  -8 -11   96.99   81.19
   8   1  11   42.20   67.69
   8  -8 -11    3.00   70.09
   0   8 -11  -28.10   62.79
   0   8 -11  -14.00   71.99
   8   0  11   79.99   63.99
   7  -8 -11   97.39   79.29
   1   7 -11   74.69   72.19
   1   7 -11   19.00   55.29
  -7   8  11   34.80   81.89
   8  -1  11  -63.49   49.80
   6  -8 -11   47.60   69.99
   2   6 -11  106.09   84.89
   2   6 -11  188.98   68.39
   8  -2  11    1.70   56.19
  -6   8  11  167.48   94.19
   3   5 -11   -6.60   73.89
   3   5 -11   -9.20   47.80
   8  -3  11 -117.19   56.79
   8  -3  11   -1.60   56.49
  -5   8  11  -46.90   72.99
   4   4 -11  142.49   63.09
  -4   8  11  -20.90   73.19
   8  -4  11   77.49   63.89
   8  -4  11  154.08   89.89
   5   3 -11  403.66   84.69
  -3   8  11  757.52  132.29
   8  -5  11  327.17  121.19
   8  -5  11  434.56  100.99
   6   2 -11   -7.20   48.00
   8  -6  11   22.70   86.59
   8  -6  11  134.49   74.49
  -2   8  11   36.30   72.49
   7   1 -11   43.40   56.89
  -1   8  11   -6.10   66.49
   8  -7  11   61.79   77.89
  -8   8 -11  218.28  119.39
   8   0 -11   82.19   60.79
   0   8  11  118.49   78.49
   8  -8  11  -29.30   75.09
   9  -1 -11    6.00   70.89
  -8   9 -11   48.20  108.29
   1   8  11   83.59   76.79
   1   8 -11   63.89   68.59
   1   8 -11   77.19   83.89
   9  -1  11   44.40   59.69
  -8   9  11  161.38   99.79
   2   7 -11   75.09   61.69
   2   7 -11  271.97  110.49
   9  -2  11   34.20   64.59
  -7   9  11   -9.70   84.69
   3   6 -11  147.59   96.09
   3   6 -11   27.00   54.09
   9  -3  11   65.19   59.79
  -6   9  11   92.39  103.39
   4   5 -11  112.39   66.59
   4   5 -11   40.00   84.59
   9  -4  11  132.29   77.19
   9  -4  11  173.98   84.19
  -5   9  11  223.18  104.69
   5   4 -11   -2.60   53.89
   9  -5  11   68.09   78.39
   9  -5  11   33.40   65.69
  -4   9  11   -1.60   85.99
   6   3 -11   37.20   51.59
   9  -6  11  -26.30   70.19
  -3   9  11   98.99   98.39
   9  -6  11    1.40   89.09
   7   2 -11   78.79   64.49
  -2   9  11 -156.38   69.19
   9  -7  11   12.20   78.09
   9  -7  11 -126.19   78.99
   8   1 -11   50.79   60.29
  -1   9  11  -26.10   79.39
   9  -8  11   23.20   75.09
   0   0 -12  545.25   81.19
   0   0  12  660.93   81.69
   0   0  12  691.03   99.39
   0   1 -12  543.65   82.99
   1  -1 -12  268.97   64.99
  -1   0 -12  373.66   69.89
   1   0  12  478.75   97.19
  -1   1  12  273.47   73.59
   1   0  12  226.78   57.19
  -1   1  12  350.26   63.69
   0  -1  12  188.68   60.79
   1   0 -12  254.57   61.79
   0  -1 -12  227.58   57.49
  -1   1 -12  144.09   55.29
   0   1  12  112.79   62.59
  -1   0  12  165.98   52.69
   1  -1  12  191.28   70.39
   0   1  12  104.19   46.20
   1  -1  12  181.88   54.39
  -1   0  12  243.58   74.79
  -1   2 -12   64.19   46.50
  -1  -1 -12   71.59   44.30
   2  -1 -12   -0.40   42.50
  -2   1  12   92.79   49.60
  -2   1  12   68.89   51.19
   1  -2  12   41.10   46.60
   1   1  12   63.49   57.69
   1   1  12  -19.00   43.30
  -2  -1 -12  195.88   53.39
   3  -2 -12  278.77   66.79
  -1   3 -12  413.26   84.09
  -3   2  12  219.08   60.99
   2   1  12  228.78   58.79
  -3   2  12  258.77   60.79
   1  -3  12  258.67   61.29
   2   1  12  224.08   71.29
   2  -2 -12  258.07   63.59
   0   2 -12  221.18   62.99
  -2   0 -12  319.27   67.69
   2   0  12  267.57   64.59
  -2   2  12  366.86   71.49
   0  -2  12  325.77   63.19
  -2   2  12  224.08   65.09
   2   0  12  371.56   82.79
   1   1 -12  465.25   80.19
  -2   1 -12  510.75   81.89
   1  -2 -12  525.25   77.49
   2  -1  12  349.67   69.89
  -1  -1  12  497.95   73.89
   2  -1  12  468.45   92.99
  -1   2  12  538.85   83.09
  -1   2  12  432.16   78.19
   2   0 -12  180.98   57.59
  -2   2 -12  108.89   54.29
   0  -2 -12  200.38   63.49
   2  -2  12  165.18   54.89
  -2   0  12  177.18   57.99
   0   2  12  161.98   58.59
   0   2  12  229.58   66.79
   3  -1 -12  558.54   85.59
  -1  -2 -12  637.04   81.39
  -2   3 -12  579.44   88.89
   1   2  12  642.24   81.79
  -3   1  12  542.35   86.19
   1   2  12  541.95   87.79
   2  -3  12  580.44   82.29
  -3   1  12  494.65   79.79
  -2  -2 -12  126.39   51.39
   4  -2 -12  183.28   67.79
  -2   4 -12   44.00   53.19
  -2   4 -12  174.48   50.79
   2   2  12  116.79   51.09
  -4   2  12  131.89   55.59
  -4   2  12  150.98   57.69
   2  -4  12  110.79   56.19
  -2   5 -12  352.36   85.99
   5  -3 -12  438.96   84.79
  -2   5 -12  482.15   79.79
  -5   3  12  336.97   61.89
   3   2  12  436.36   80.69
   2  -5  12  437.06   84.49
  -5   3  12  417.16   83.69
  -1   4 -12  147.89   58.49
   4  -3 -12  140.69   60.69
  -1   4 -12   54.59   60.39
  -3  -1 -12  140.89   50.59
  -4   3  12  126.99   58.79
   3   1  12  134.69   54.29
  -4   3  12   71.19   43.00
   3   1  12  162.98   75.69
   1  -4  12  109.49   48.80
   0   3 -12  181.68   63.19
   3  -3 -12  141.29   62.89
  -3   0 -12  227.58   59.49
   3   0  12   97.09   62.89
   0  -3  12  147.29   49.40
  -3   3  12  154.58   52.99
  -3   3  12  176.48   58.89
   3   0  12  134.29   55.49
   2  -3 -12 1117.49  105.19
   1   2 -12 1166.98  102.69
  -3   1 -12 1037.80  101.69
  -1  -2  12 1000.50   89.39
   3  -1  12 1219.68  103.69
   3  -1  12  920.21  116.49
  -2   3  12 1126.49  103.99
  -2   3  12 1094.39  107.99
   2   1 -12  137.89   54.69
   1  -3 -12  138.29   54.09
  -3   2 -12  107.59   60.09
   3  -2  12  175.98   79.09
  -1   3  12  172.68   60.89
  -2  -1  12  242.78   57.19
   3  -2  12  105.29   59.49
   3   0 -12  119.49   53.59
   0  -3 -12  186.38   56.29
  -3   3 -12   52.19   54.39
   3  -3  12  178.78   59.49
   0   3  12  106.39   57.09
  -3   0  12   96.19   48.30
  -3   4 -12  390.36   57.29
  -1  -3 -12  418.86   73.59
   4  -1 -12  425.86   78.59
  -3   4 -12  519.65   98.29
  -4   1  12  429.86   74.29
   1   3  12  406.76   76.19
  -4   1  12  322.87   74.69
   3  -4  12  439.26   83.49
   5  -2 -12 1132.09  112.39
  -3   5 -12  899.81   84.29
  -3   5 -12  714.73  109.89
   3  -5  12  940.41  105.59
  -5   2  12  928.01   87.59
  -5   2  12  916.51   99.99
   2   3  12  973.20   98.69
  -3   6 -12    3.60   54.99
  -3   6 -12  -88.79   63.29
   6  -3 -12   -4.90   44.00
   3  -6  12  132.99  101.79
   3   3  12   34.70   50.19
  -3   7 -12  315.67   90.29
  -3   7 -12  393.86  108.79
   7  -4 -12  551.84  105.19
   4   3  12  330.47   72.79
  -2   6 -12  318.37   86.99
   6  -4 -12  195.78   75.59
  -2   6 -12  290.57   86.19
   4   2  12  269.37   69.89
  -6   4  12  210.58   71.79
  -1   5 -12   41.70   52.89
  -1   5 -12   67.59   56.79
   5  -4 -12  -15.10   49.60
   4   1  12  -73.89   32.30
  -5   4  12    8.10   50.69
   0   4 -12  711.43   95.29
   0   4 -12  694.13   94.59
   4  -4 -12  677.73   94.49
  -4   0 -12  703.53   89.49
   4   0  12  653.53   86.29
   4   0  12  590.74  106.39
  -4   4  12  686.53   93.39
   1   3 -12  339.17   70.59
   3  -4 -12  446.46   84.19
  -4   1 -12  385.26   76.19
   4  -1  12  352.56   75.49
   4  -1  12  371.66   98.59
  -1  -3  12  376.36   69.89
   2  -4 -12   90.89   55.09
  -4   2 -12   62.19   53.29
   2   2 -12   39.00   53.39
   4  -2  12   64.19   67.89
   4  -2  12  110.79   57.29
  -2   4  12  195.18   63.59
  -2  -2  12  122.39   50.99
   3   1 -12 1071.09  101.69
   1  -4 -12 1004.40  101.39
  -4   3 -12  822.32  104.29
   4  -3  12 1079.59  105.29
   4  -3  12  934.11  123.49
  -3  -1  12  899.41  111.69
  -1   4  12  876.11  100.59
  -4   4 -12  -25.40   54.29
   4   0 -12   58.19   55.49
   0  -4 -12  -64.79   41.50
   4  -4  12  -29.70   46.80
   0   4  12   62.29   46.40
  -4   5 -12   31.00   38.50
   5  -1 -12   56.79   48.20
  -4   5 -12   42.80   66.39
   1   4  12   -3.20   39.70
   4  -5  12  -48.80   46.30
   6  -2 -12   98.29   59.49
  -4   6 -12   80.39   76.49
  -4   6 -12   76.09   54.49
   4  -6  12   32.70   56.39
   2   4  12   57.09   50.99
  -4   7 -12   40.20   63.59
   7  -3 -12   95.59   66.19
  -4   7 -12   20.20   87.19
   3   4  12   23.40   47.00
  -4   8 -12  203.38  106.49
  -4   8 -12   77.49   79.69
   8  -4 -12   37.50   64.09
   4   4  12  142.89   63.69
  -4   9 -12  148.79   99.79
   9  -5 -12  165.68   96.99
  -4   9 -12  375.46  135.19
   5   4  12  143.39   63.69
   8  -5 -12   -1.70   66.39
  -3   8 -12  -45.10   73.09
  -3   8 -12    2.20   90.89
   5   3  12    2.70   43.10
   7  -5 -12   39.80   70.89
  -2   7 -12   89.69   72.49
  -2   7 -12   -5.80   72.99
   5   2  12   31.60   51.99
  -1   6 -12  191.18   74.09
  -1   6 -12   81.99   75.69
   6  -5 -12   67.69   67.49
  -6   5  12   26.10   66.39
   5   1  12  135.29   58.29
   0   5 -12   60.79   63.29
   5  -5 -12  -51.49   52.39
   0   5 -12   49.99   53.19
  -5   5  12   70.59   62.79
   5   0  12  -23.80   54.89
   5   0  12  -12.80   44.50
   1   4 -12  321.47   73.59
   4  -5 -12  425.76   90.39
   1   4 -12  402.26   88.99
   5  -1  12  222.88   88.39
   5  -1  12  534.45   89.79
  -4   5  12  512.65   96.19
   3  -5 -12  541.95   99.49
   2   3 -12  417.96   77.59
  -5   2 -12  494.15   83.29
   5  -2  12  359.16  110.09
   5  -2  12  480.15   86.19
  -3   5  12  579.84   96.09
   2  -5 -12   62.49   59.69
  -5   3 -12  182.78   72.79
   3   2 -12  153.48   58.39
   5  -3  12  235.28  100.39
  -2   5  12  133.49   57.79
   5  -3  12  102.19   60.79
   4   1 -12  313.77   70.09
  -5   4 -12  343.17   86.79
   5  -4  12  336.37   79.49
  -1   5  12  387.56   81.59
   5   0 -12  260.67   66.99
  -5   5 -12  453.15   98.89
   5  -5  12  282.27   87.09
   0   5  12  460.55   90.59
   6  -1 -12   38.40   50.29
  -5   6 -12  306.87  101.89
   5  -6  12  162.38   72.79
   1   5  12  195.48   68.79
   7  -2 -12   31.00   50.69
  -5   7 -12   83.49   85.39
   2   5  12   57.09   51.49
   5  -7  12   69.49   74.49
   8  -3 -12  511.25  106.29
  -5   8 -12  449.86  129.59
   3   5  12  356.66   84.69
   9  -4 -12   63.89   83.39
  -5   9 -12   34.90  109.89
   4   5  12   21.90   51.39
   9  -6 -12  -19.70   67.99
  -3   9 -12  -67.39   92.09
  -3   9 -12   27.40   91.59
   6   3  12   48.40   50.79
  -2   8 -12   90.39   88.09
   8  -6 -12   89.89   84.29
  -2   8 -12  140.49   93.19
   6   2  12   54.39   57.69
  -1   7 -12    8.30   70.19
  -1   7 -12  -52.69   52.69
   7  -6 -12   55.89   76.49
   6   1  12   39.30   50.49
  -7   6  12   63.79   76.29
   0   6 -12   51.99   65.79
   0   6 -12   54.69   53.49
   6  -6 -12  -75.09   57.29
   6   0  12  -38.80   43.80
  -6   6  12  -41.40   62.79
   1   5 -12  627.94  115.09
   5  -6 -12  473.55   94.99
   1   5 -12  603.04   95.69
   6  -1  12  300.87   92.09
   6  -1  12  389.46   80.89
  -5   6  12  557.24  110.39
   2   4 -12   35.20   63.59
   4  -6 -12  166.78   69.29
   2   4 -12   56.49   51.19
   6  -2  12    4.60   46.80
  -4   6  12   41.50   69.59
   6  -2  12   69.39   78.59
   3   3 -12   26.90   53.89
   3  -6 -12   75.99   58.99
   6  -3  12  -62.39   42.20
  -3   6  12  104.99   68.79
   6  -3  12   81.89   75.79
   4   2 -12  841.12   98.49
  -6   4 -12  735.23  112.79
   6  -4  12  759.72  108.49
   6  -4  12  551.54  115.39
  -2   6  12  874.61  115.19
   5   1 -12   70.99   53.29
  -6   5 -12   92.29   81.59
  -1   6  12  178.78   68.19
   6  -5  12   58.89   66.49
   6   0 -12   48.90   61.49
  -6   6 -12   73.39   82.59
   6  -6  12   13.30   64.79
   0   6  12  -53.99   47.80
   7  -1 -12  180.58   74.59
  -6   7 -12  200.58   92.99
   6  -7  12  105.79   75.99
   1   6  12  132.09   65.79
   8  -2 -12   37.40   64.29
  -6   8 -12  -28.70   97.69
   2   6  12  -42.70   48.40
  -6   9 -12  139.29  115.69
   9  -3 -12  -90.59   58.39
   3   6  12   58.19   65.49
  -2   9 -12  -17.00   98.39
   9  -7 -12  148.69   90.19
  -2   9 -12   -5.50   88.69
   7   2  12   90.59   61.29
  -1   8 -12  -33.20   80.69
   8  -7 -12   51.29   76.09
  -1   8 -12   -3.00   73.39
   7   1  12   91.89   55.19
   0   7 -12  148.49   85.79
   0   7 -12    7.70   55.79
   7  -7 -12 -111.09   60.89
   7   0  12   70.29   51.59
  -7   7  12  -40.90   69.29
   6  -7 -12   91.29   73.89
   1   6 -12  136.09   83.79
   1   6 -12   62.69   66.39
  -6   7  12  220.28   90.19
   7  -1  12  101.69   62.89
   2   5 -12   63.59   77.49
   2   5 -12   43.80   50.09
   5  -7 -12   23.50   63.49
  -5   7  12   -7.90   69.49
   7  -2  12   31.50   54.39
   7  -2  12  -40.90   66.79
   3   4 -12  321.77   78.39
  -4   7  12  465.85  102.69
   7  -3  12  477.65   96.79
   7  -3  12  229.08  100.19
   4   3 -12   85.79   53.59
  -3   7  12  -15.50   67.39
   7  -4  12  102.79  105.49
   7  -4  12   31.10   62.19
   5   2 -12  -24.50   45.60
  -2   7  12  -17.80   60.69
   7  -5  12   99.59  110.69
   7  -5  12  201.48   83.09
   6   1 -12  -10.60   50.89
  -7   6 -12    3.40   79.59
   7  -6  12   -1.60   70.79
  -1   7  12    2.00   64.69
  -7   7 -12  -86.39   84.19
   7   0 -12   -7.10   48.90
   0   7  12   38.80   66.59
   7  -7  12  -54.39   60.79
   8  -1 -12  -20.30   57.79
  -7   8 -12   21.90  108.29
   7  -8  12  -73.19   67.39
  -7   9 -12  -28.50  113.19
   9  -2 -12   66.49   74.79
   2   7  12  208.68   75.79
   0   8 -12   51.69   87.09
   8  -8 -12   92.09   78.49
   0   8 -12  -12.60   72.79
   8   0  12  195.08   69.59
   1   7 -12  -62.89   72.79
   7  -8 -12   -1.80   61.89
   1   7 -12   32.50   63.69
  -7   8  12  -26.10   87.89
   8  -1  12   37.20   54.99
   2   6 -12   -7.10   55.89
   2   6 -12   78.89   80.19
   8  -2  12  -36.10   54.19
  -6   8  12   81.69   93.19
   3   5 -12    8.90   73.59
   3   5 -12    0.00   54.29
   8  -3  12   60.89   67.29
   8  -3  12   15.30   72.89
  -5   8  12   31.50   77.59
   4   4 -12   42.60   56.69
   8  -4  12   23.20   63.09
  -4   8  12    5.20   76.49
   8  -4  12  -23.40   70.89
   5   3 -12  119.19   67.39
  -3   8  12  192.98   92.99
   8  -5  12  272.27   89.69
   8  -5  12   80.69   87.39
   6   2 -12   48.40   54.39
   8  -6  12  188.38   84.59
   8  -6  12   -0.10   87.19
  -2   8  12   74.79   78.99
   7   1 -12    1.50   55.49
  -1   8  12  -29.30   75.29
   8  -7  12   17.90   75.29
   8   0 -12   65.99   64.99
  -8   8 -12  111.79  114.49
   0   8  12   71.39   78.49
   8  -8  12   12.00   76.19
   2   7 -12   -8.60   64.19
   2   7 -12    9.90   86.29
   9  -2  12   66.99   73.39
  -7   9  12  -36.10   97.69
   3   6 -12   64.49   83.19
   3   6 -12  -40.20   58.19
   9  -3  12  251.57   91.19
  -6   9  12  128.49  105.59
   9  -3  12  135.79   75.99
   4   5 -12   39.90   64.29
   9  -4  12  267.97   89.59
  -5   9  12   95.69  103.49
   9  -4  12  125.99   80.49
   5   4 -12  242.08   76.79
   9  -5  12    2.60   79.79
  -4   9  12  515.05  136.99
   9  -5  12  235.98   91.39
   6   3 -12  -57.49   50.29
   9  -6  12  -67.19   67.79
  -3   9  12   74.29   99.89
   9  -6  12   -7.10   87.39
   7   2 -12  216.98   75.79
  -2   9  12  261.17  110.29
   9  -7  12  220.68  100.79
   9  -7  12  108.39  107.89
   0   0 -13   -6.70   47.90
   0   0  13  -56.69   38.00
   0   0  13  198.48   71.79
   1  -1 -13  459.55   81.29
   0   1 -13  302.37   74.69
  -1   0 -13  339.37   70.29
  -1   1  13  254.07   69.59
  -1   1  13  394.06   84.39
   1   0  13  355.16   95.19
   1   0  13  506.45   83.39
   0  -1  13  443.76   76.89
  -1   1 -13  275.37   69.69
   1   0 -13  317.67   77.29
   0  -1 -13  322.47   72.49
   1  -1  13  374.56   76.99
  -1   0  13  196.18   76.59
   0   1  13  348.57   72.39
   1  -1  13  315.77   85.09
   0   1  13  419.36   89.79
  -1   0  13  225.68   59.59
   2  -1 -13  113.09   54.89
  -1   2 -13   78.69   60.79
  -1  -1 -13  159.68   58.49
   1   1  13  139.99   70.39
   1  -2  13   98.99   52.69
   1   1  13  186.68   56.39
  -2   1  13  206.68   68.09
  -2   1  13  178.68   61.29
  -2  -1 -13   20.60   47.20
  -1   3 -13   16.70   53.29
   3  -2 -13   35.30   48.20
   2   1  13  -21.40   56.79
   2   1  13  -18.30   36.70
  -3   2  13   22.50   47.70
   1  -3  13  -18.80   40.00
  -3   2  13   41.30   41.90
   2  -2 -13  100.49   58.09
   0   2 -13  130.99   61.99
  -2   0 -13  181.58   56.29
   2   0  13   24.10   45.70
  -2   2  13  206.48   63.89
   2   0  13   80.79   67.39
  -2   2  13  152.28   56.09
   0  -2  13  110.29   54.79
   1  -2 -13  119.29   50.59
   1   1 -13  186.78   63.49
  -2   1 -13  194.18   64.39
  -1   2  13  103.59   56.09
   2  -1  13  121.39   71.49
  -1   2  13  210.88   71.09
   2  -1  13  127.09   52.09
  -1  -1  13  160.88   57.59
  -2   2 -13  -46.00   45.30
   0  -2 -13  -25.40   40.70
   2   0 -13    2.30   44.80
   2  -2  13   15.20   43.60
   0   2  13    8.00   51.99
   0   2  13   21.50   41.60
  -2   0  13   64.19   48.90
  -2   3 -13  539.65   94.99
   3  -1 -13  442.26   79.69
  -1  -2 -13  613.54   85.19
   1   2  13  591.24  107.69
  -3   1  13  691.73   91.49
   2  -3  13  387.26   74.79
   1   2  13  569.54   90.29
  -3   1  13  489.35   89.99
   4  -2 -13  360.26   78.49
  -2   4 -13  242.78   57.59
  -2  -2 -13  169.28   60.89
  -2   4 -13  219.58   76.39
  -4   2  13  191.58   64.29
   2   2  13  297.77   70.29
   2  -4  13  305.07   69.99
   5  -3 -13   33.00   58.19
  -2   5 -13   13.00   63.49
  -2   5 -13   33.90   53.59
  -5   3  13   30.40   53.89
   2  -5  13    4.20   46.50
  -5   3  13    8.60   39.40
   3   2  13  -14.60   42.00
   4  -3 -13   13.60   50.99
  -1   4 -13   65.99   56.39
  -1   4 -13  406.16   90.19
   3   1  13  131.69   73.99
  -4   3  13   86.79   58.19
   1  -4  13  170.48   59.69
  -4   3  13  214.38   59.09
   3   1  13  149.39   56.99
   0   3 -13   90.29   59.09
   3  -3 -13  154.38   63.59
  -3   0 -13  204.38   60.39
   0  -3  13  118.89   53.09
  -3   3  13  128.79   52.59
   3   0  13   54.09   46.10
  -3   3  13   77.09   54.79
   3   0  13   61.79   70.09
  -3   1 -13  -18.90   46.80
   2  -3 -13  139.79   58.69
   1   2 -13  -21.70   47.40
   3  -1  13   31.00   46.90
  -2   3  13   13.90   49.99
  -1  -2  13   17.00   41.10
  -2   3  13   48.10   51.09
   3  -1  13   85.29   69.89
   1  -3 -13  885.21   97.49
  -3   2 -13 1109.39  108.19
   2   1 -13  860.01   97.99
   3  -2  13 1286.57  126.59
  -2  -1  13  859.71   93.19
   3  -2  13  995.60  105.79
  -1   3  13 1122.09  110.59
   3   0 -13  137.49   59.79
   0  -3 -13  229.98   67.39
  -3   3 -13  221.18   73.29
   0   3  13  189.88   59.39
   3  -3  13  254.97   75.59
  -3   0  13  135.19   54.49
  -1  -3 -13   47.50   52.79
   4  -1 -13   37.70   51.19
  -3   4 -13  159.98   79.19
   3  -4  13  -17.70   50.99
  -4   1  13  -44.90   52.79
   1   3  13  -16.10   39.30
  -3   5 -13 1021.50   91.49
  -3   5 -13 1113.69  130.39
   5  -2 -13  938.81  111.19
   3  -5  13  822.02  106.59
  -5   2  13  873.41   92.99
   2   3  13  932.51  103.19
  -3   6 -13  103.69   60.49
   6  -3 -13  -33.70   50.89
  -3   6 -13  108.19   75.69
   3   3  13   29.70   48.00
  -3   7 -13  -43.00   79.69
   7  -4 -13   24.10   59.19
  -3   7 -13   -7.10   67.39
   4   3  13  -36.30   39.20
  -2   6 -13  202.98   73.19
  -2   6 -13  355.26  100.59
   6  -4 -13  248.28   74.99
   4   2  13  161.88   60.29
  -1   5 -13  647.64  100.69
   5  -4 -13  718.53  104.79
  -1   5 -13  578.74  102.39
   4   1  13  616.54   95.99
  -5   4  13  709.63  111.19
   0   4 -13  262.07   79.09
   0   4 -13  192.98   67.09
   4  -4 -13  283.97   74.79
  -4   4  13  338.67   86.89
   4   0  13  228.98   65.09
   4   0  13  291.47   86.49
  -4   1 -13 1987.60  136.29
   1   3 -13 2006.60  138.29
   3  -4 -13 2003.50  143.09
   4  -1  13 1737.73  159.58
  -3   4  13 2080.09  138.49
   4  -1  13 1726.03  129.79
  -4   2 -13 1071.59  110.99
   2   2 -13 1090.09  111.49
   2  -4 -13 1061.29  112.39
   4  -2  13 1149.89  137.69
  -2   4  13 1014.20  110.39
   4  -2  13 1144.69  112.89
  -4   3 -13  373.56   83.59
   3   1 -13  364.66   75.69
   1  -4 -13  397.06   83.09
   4  -3  13  345.57   80.49
  -1   4  13  451.05   86.79
   4  -3  13  395.96  104.19
  -4   4 -13  219.48   83.69
   4   0 -13  183.38   68.09
   4  -4  13  320.37   80.79
   0   4  13  260.17   71.49
  -4   5 -13  371.16   96.29
   5  -1 -13  322.17   76.79
   1   4  13  305.47   76.19
   4  -5  13  422.06   92.69
   6  -2 -13   21.30   52.19
  -4   6 -13   51.29   80.79
   2   4  13  -13.10   44.50
   4  -6  13    3.40   55.99
  -4   7 -13  394.46  115.19
   7  -3 -13  331.17   85.99
   3   4  13  295.37   77.59
   8  -4 -13  134.39   75.79
  -4   8 -13  285.77  119.39
   4   4  13  133.69   68.19
  -4   9 -13   73.79  112.19
   9  -5 -13    2.60   77.49
   5   4  13  -19.70   52.39
  -3   8 -13  107.69   87.99
   8  -5 -13  275.97   92.39
  -3   8 -13  532.55  128.19
   5   3  13  284.07   78.69
  -2   7 -13   27.70   70.89
   7  -5 -13   37.00   62.69
  -2   7 -13   31.40   67.19
   5   2  13   11.70   49.90
  -1   6 -13  -15.00   63.89
   6  -5 -13   -1.50   55.69
  -1   6 -13   72.29   70.09
   5   1  13   69.19   49.90
  -6   5  13   58.69   66.99
   0   5 -13  364.16   93.99
   5  -5 -13  399.36   88.39
   0   5 -13  368.16   88.99
  -5   5  13  415.86   93.99
   5   0  13  418.76   81.69
   5   0  13  209.28   85.49
   1   4 -13   57.19   61.29
   4  -5 -13  177.08   75.49
   1   4 -13  186.68   62.89
   5  -1  13  290.37   93.49
  -4   5  13  236.18   72.39
   5  -1  13  200.38   66.99
  -5   2 -13   20.20   56.19
   2   3 -13  240.28   72.29
   3  -5 -13  173.68   71.19
   5  -2  13  151.88   62.39
   5  -2  13  106.09   78.09
  -3   5  13  186.28   74.29
  -5   3 -13 1496.45  139.39
   3   2 -13 1642.74  122.69
   2  -5 -13 1456.15  123.29
   5  -3  13 1386.56  146.89
  -2   5  13 1509.75  128.49
   5  -3  13 1432.06  132.59
   4   1 -13  334.57   76.29
  -5   4 -13  178.38   83.09
  -1   5  13  129.39   62.59
   5  -4  13  196.28   69.69
   5  -4  13  141.79   85.29
  -5   5 -13   -5.10   71.79
   5   0 -13   62.99   51.39
   0   5  13   34.20   55.79
   5  -5  13 -102.29   47.90
   6  -1 -13  163.08   68.59
  -5   6 -13  276.07  103.19
   5  -6  13  263.47   84.89
   1   5  13  192.88   66.39
  -5   7 -13  197.28  105.39
   7  -2 -13   14.50   52.99
   2   5  13  181.58   73.69
   8  -3 -13  179.88   81.39
  -5   8 -13   25.80  109.79
   3   5  13   51.19   57.39
   9  -4 -13  933.11  145.59
  -5   9 -13  915.01  169.58
   4   5  13  537.55  107.89
  -3   9 -13   94.09  111.29
   9  -6 -13  150.98   91.59
  -3   9 -13   24.00   88.79
   6   3  13  -70.59   49.00
  -2   8 -13   93.59   84.39
   8  -6 -13   87.89   83.29
  -2   8 -13    9.20   83.09
   6   2  13   36.50   50.49
  -1   7 -13  -89.29   60.99
   7  -6 -13  137.09   77.79
  -1   7 -13  162.58   82.99
   6   1  13   30.10   50.09
   0   6 -13 -106.49   55.19
   0   6 -13  -12.80   64.89
   6  -6 -13 -102.39   48.80
   6   0  13  -58.59   45.80
  -6   6  13  -51.59   58.79
   5  -6 -13   91.49   65.69
   1   5 -13  -85.89   59.89
   1   5 -13  -18.50   60.29
  -5   6  13  -55.69   55.19
   6  -1  13  -88.29   42.80
   6  -1  13   29.00   71.19
   4  -6 -13  362.06   84.99
   2   4 -13  355.06   81.29
  -4   6  13  517.65  108.29
   6  -2  13  560.84  118.99
   6  -2  13  440.96   91.19
   3   3 -13  234.48   75.29
   3  -6 -13  157.88   75.59
   6  -3  13  146.69   64.79
   6  -3  13  110.29   84.69
  -3   6  13  114.39   74.79
   4   2 -13   48.60   55.79
  -6   4 -13    5.50   66.49
   6  -4  13  157.78   74.89
   6  -4  13   73.99   86.39
  -2   6  13   68.39   65.49
  -6   5 -13  174.08   87.29
   5   1 -13  151.78   65.19
  -1   6  13  111.39   64.69
   6  -5  13   63.29   76.19
  -6   6 -13  125.59   88.49
   6   0 -13   34.70   59.79
   6  -6  13  149.39   77.69
   0   6  13  -57.19   50.79
  -6   7 -13  176.18  105.69
   7  -1 -13   79.99   72.59
   6  -7  13   43.90   69.09
   1   6  13  127.69   63.39
  -6   8 -13  -12.10   98.29
   8  -2 -13  -27.90   62.29
   2   6  13  141.69   71.19
   9  -3 -13  -70.19   61.39
  -6   9 -13  112.09  114.09
   3   6  13   36.30   59.59
  -1   8 -13   75.39   81.69
  -1   8 -13  106.59   86.09
   8  -7 -13  100.69   87.39
   7   1  13   66.09   58.99
   0   7 -13 -124.59   60.69
   0   7 -13  114.09   66.49
   7  -7 -13   47.00   77.99
   7   0  13  -22.40   49.00
  -7   7  13  192.18   92.49
   1   6 -13   45.60   71.29
   6  -7 -13  147.69   87.89
   1   6 -13  118.59   88.89
   7  -1  13   98.09   61.19
  -6   7  13   -7.40   77.49
   5  -7 -13   76.99   74.19
   2   5 -13  200.38   70.59
   2   5 -13   72.09   77.69
   7  -2  13  200.58  100.39
   7  -2  13  288.37   77.49
  -5   7  13  366.56  107.49
   3   4 -13   86.79   56.69
  -4   7  13   40.30   74.09
   7  -3  13  -26.60   57.89
   7  -3  13   10.10   78.89
   4   3 -13  218.78   74.29
   7  -4  13  307.57   93.09
   7  -4  13  190.38   99.09
  -3   7  13  263.77   97.99
   5   2 -13   69.69   62.69
   7  -5  13   64.49  105.29
  -2   7  13  156.98   86.49
   7  -5  13  225.68   89.69
  -7   6 -13  -44.00   74.99
   6   1 -13   13.40   52.89
  -1   7  13   25.10   68.09
   7  -6  13   35.30   70.89
  -7   7 -13  -52.49   90.19
   7   0 -13    5.30   58.09
   7  -7  13  130.29   88.99
   8  -1 -13   20.60   66.59
  -7   8 -13  -23.70   94.89
   1   7  13   48.40   64.59
   1   7 -13   21.70   86.59
   1   7 -13    7.20   65.29
   7  -8 -13   21.80   71.09
  -7   8  13  -20.20   83.19
   8  -1  13  126.59   66.39
   2   6 -13   36.90   54.69
   2   6 -13   15.60   78.99
   8  -2  13   93.89   63.49
   8  -2  13  143.69   86.89
  -6   8  13  -44.90   79.59
   3   5 -13   95.59   65.79
   3   5 -13   35.50   83.09
  -5   8  13  297.37  112.59
   8  -3  13   88.19   90.79
   8  -3  13    6.70   62.99
   4   4 -13   10.50   57.99
   8  -4  13  156.08   82.99
   8  -4  13   43.60   76.89
  -4   8  13   78.89   93.59
   5   3 -13   71.09   66.79
   8  -5  13 -166.48   68.89
  -3   8  13   62.49   87.29
   8  -5  13  -41.90   64.19
   6   2 -13   39.00   59.49
  -2   8  13  -12.80   82.09
   8  -6  13   35.00   87.99
   8  -6  13  114.09   83.49
   7   1 -13   26.30   61.19
   8  -7  13   77.29   81.49
  -1   8  13   19.30   72.59
   3   6 -13   55.69   70.09
   3   6 -13  179.08   97.09
   9  -3  13  252.27   96.29
  -6   9  13  213.08  120.79
   9  -3  13  203.68   93.29
   4   5 -13   16.50   58.69
   9  -4  13  -61.49   68.69
  -5   9  13  -14.30   91.39
   9  -4  13  166.98   84.19
   5   4 -13  198.08   77.69
   9  -5  13  275.17   94.79
  -4   9  13  370.56  133.99
   9  -5  13  201.48   97.09
   6   3 -13   11.10   58.59
   9  -6  13  -63.89   69.39
   9  -6  13   30.50   97.09
  -3   9  13  123.29  103.89
   0   0 -14   78.79   56.19
   0   0  14   47.50   47.50
   0   0  14   33.10   61.79
   1  -1 -14   58.59   59.29
  -1   0 -14   23.30   49.90
   0   1 -14   71.19   59.89
   1   0  14   41.40   48.10
   1   0  14   -9.10   56.59
  -1   1  14   19.80   57.99
   0  -1  14  -43.00   36.90
  -1   1  14   38.20   49.50
  -1   1 -14  359.96   77.59
   0  -1 -14  181.58   61.39
   1   0 -14  258.27   68.49
   0   1  14  289.37   70.39
   1  -1  14  166.88   83.19
  -1   0  14  184.68   57.79
   1  -1  14  285.27   67.49
  -1   0  14  124.59   74.99
   0   1  14  282.17   85.29
  -1  -1 -14  340.47   74.49
   2  -1 -14  325.17   76.19
  -1   2 -14  276.07   78.29
   1   1  14  394.96   84.09
   1   1  14  364.16   94.49
  -2   1  14  341.67   83.59
   1  -2  14  255.17   72.49
  -2   1  14  251.07   69.89
  -2  -1 -14  418.16   77.79
   3  -2 -14  526.85   95.99
  -1   3 -14  572.24   98.09
  -3   2  14  492.95   90.89
   1  -3  14  520.95   90.39
   2   1  14  435.66   98.39
  -3   2  14  553.64   96.09
   2   1  14  374.56   82.89
   2  -2 -14  163.08   65.59
  -2   0 -14  154.68   67.89
   0   2 -14  179.48   69.99
   0  -2  14   49.80   50.09
   2   0  14  196.58   88.39
  -2   2  14  282.97   74.19
  -2   2  14  200.88   62.59
   2   0  14  105.79   53.89
   1   1 -14  959.10  106.69
  -2   1 -14 1104.79  112.99
   1  -2 -14  705.03   98.39
  -1   2  14 1030.00  113.29
   2  -1  14  740.43  103.29
  -1  -1  14  765.42   95.59
  -1   2  14  892.11  107.69
   2  -1  14 1036.80  129.39
  -2   2 -14   56.99   64.69
   0  -2 -14   58.59   51.59
   2   0 -14   -5.30   46.90
  -2   0  14   96.69   56.29
   2  -2  14   24.40   49.10
   0   2  14  121.29   56.19
   0   2  14   12.30   53.99
  -1  -2 -14  129.09   56.19
  -2   3 -14  127.79   66.29
   3  -1 -14   39.70   55.09
  -3   1  14  114.59   68.69
   1   2  14   51.79   59.19
   2  -3  14   33.50   51.89
   1   2  14  166.28   59.39
  -3   1  14  118.79   58.89
   4  -2 -14  592.64  100.89
  -2   4 -14  599.74  108.99
   2  -4  14  332.07   79.29
   2   2  14  323.07   74.19
  -4   2  14  343.57   81.99
   5  -3 -14  165.98   70.09
  -2   5 -14  303.57   75.79
  -2   5 -14  378.46  102.49
   3   2  14  284.97   77.29
  -5   3  14  402.26   73.19
  -5   3  14  311.57   83.29
   4  -3 -14   63.39   62.99
  -1   4 -14  160.68   80.29
  -4   3  14   18.90   46.20
   3   1  14   93.49   58.79
   3   1  14   93.19   72.39
  -4   3  14   -2.70   54.39
   1  -4  14   -9.60   51.59
   0   3 -14  451.65   96.89
   3  -3 -14  472.45   89.09
  -3   0 -14  389.46   80.19
   3   0  14  267.47   79.99
   3   0  14  275.97   93.29
   0  -3  14  333.27   73.49
  -3   3  14  541.95  101.89
  -3   3  14  489.05   80.89
   2  -3 -14  705.23  105.19
   1   2 -14  749.13  104.39
  -3   1 -14  730.03  101.39
   3  -1  14  620.44   96.49
  -1  -2  14  726.23   92.39
  -2   3  14  487.55   88.59
  -2   3  14  528.05   95.49
   3  -1  14  647.94  110.09
  -3   2 -14   31.20   58.49
   2   1 -14   74.29   49.40
   1  -3 -14  -19.30   50.69
  -2  -1  14   61.79   53.49
   3  -2  14    3.40   48.60
  -1   3  14  133.59   67.19
  -1   3  14    7.00   46.40
   3  -2  14  116.09   84.79
   3   0 -14   53.99   55.79
  -3   3 -14   60.79   65.99
   0  -3 -14   39.80   52.99
   0   3  14   97.89   54.79
  -3   0  14   -3.10   50.39
   3  -3  14   67.39   52.09
   4  -1 -14  231.18   71.09
  -3   4 -14  337.67   94.59
   3  -4  14  347.17   85.99
   1   3  14  329.67   75.29
  -4   1  14  423.86   90.59
  -3   5 -14  175.78   79.19
   5  -2 -14   17.40   53.89
   2   3  14   45.80   53.69
   3  -5  14   -4.80   61.09
  -5   2  14   10.10   50.49
   6  -3 -14  -42.10   53.89
  -3   6 -14   -7.40   55.59
  -3   6 -14   72.39   86.09
   3   3  14   39.80   53.09
  -3   7 -14  418.76  122.59
  -3   7 -14  315.67   88.69
   7  -4 -14  420.66   97.19
   4   3  14  413.06   88.19
  -2   6 -14  -93.29   64.49
  -2   6 -14    0.50   65.49
   6  -4 -14   46.00   62.19
   4   2  14   15.40   42.30
  -1   5 -14  265.27   76.89
  -1   5 -14  241.68   87.89
   5  -4 -14  309.67   83.29
   4   1  14  193.38   69.19
  -5   4  14  234.28   83.89
   4  -4 -14   88.99   63.89
   0   4 -14  109.29   65.89
   4   0  14  229.38   87.39
   4   0  14  110.49   60.09
  -4   4  14  134.79   68.59
   3  -4 -14  -92.29   46.60
  -4   1 -14   30.30   51.99
   1   3 -14   69.89   58.09
   4  -1  14   71.39   52.49
  -3   4  14   50.99   52.49
   4  -1  14   70.69   82.79
   2  -4 -14  601.94  102.59
   2   2 -14  405.16   82.69
  -4   2 -14  673.23  108.59
   4  -2  14  442.66  108.59
   4  -2  14  449.66   94.09
  -2   4  14  579.54  103.69
   1  -4 -14  111.39   62.19
  -4   3 -14  228.78   87.49
   3   1 -14   33.10   61.39
  -1   4  14  151.28   62.69
   4  -3  14  210.98   95.79
   4  -3  14  244.08   79.39
   4   0 -14  134.89   63.19
  -4   4 -14  -30.60   61.59
   0   4  14   39.90   44.20
   4  -4  14   68.99   54.69
   5  -1 -14  206.68   69.59
  -4   5 -14  342.17   99.29
  -5   1  14  104.69   71.49
   4  -5  14  113.89   69.29
   1   4  14  212.78   68.79
   6  -2 -14   98.19   65.59
  -4   6 -14   23.90   80.29
   4  -6  14   56.39   72.29
   2   4  14   40.30   54.39
  -4   7 -14   51.29   89.09
   7  -3 -14   -0.90   54.39
   3   4  14  -67.09   40.90
   8  -4 -14  314.47   94.49
  -4   8 -14  360.76  129.69
   4   4  14  286.87   83.19
  -3   8 -14  208.98  100.39
   8  -5 -14   31.00   64.89
  -3   8 -14  153.48   91.19
   5   3  14   77.59   60.69
  -2   7 -14  505.85  119.09
  -2   7 -14  224.88   81.99
   7  -5 -14  201.68   82.09
   5   2  14  297.47   77.79
  -1   6 -14   35.10   72.99
  -1   6 -14   43.90   69.29
   6  -5 -14  110.99   75.29
  -6   5  14  145.29   77.19
   5   1  14  -20.80   44.00
   0   5 -14  109.79   70.79
   5  -5 -14  171.58   79.69
   0   5 -14   62.19   67.29
   5   0  14   81.99   76.89
  -5   5  14   67.49   73.89
   5   0  14  236.78   74.19
   4  -5 -14  481.25   98.09
   1   4 -14  268.97   79.19
   5  -1  14  336.37   97.09
  -4   5  14  421.86  100.19
   5  -1  14  276.97   75.69
   3  -5 -14  181.98   72.99
   2   3 -14  268.37   78.19
   5  -2  14  256.47   73.59
   5  -2  14  100.69   81.49
   3   2 -14   47.80   55.69
   2  -5 -14  158.18   65.59
  -5   3 -14   84.19   75.89
  -2   5  14    8.90   53.49
   5  -3  14  150.18   69.09
   5  -3  14   22.90   79.69
  -5   4 -14 1172.28  138.99
   4   1 -14 1110.59  121.09
   5  -4  14  725.83  133.59
  -1   5  14  711.73  110.89
   5  -4  14  678.63  115.19
  -5   5 -14  417.96  105.29
   5   0 -14  313.67   79.69
   0   5  14  370.16   86.89
   5  -5  14  383.56   91.49
  -5   6 -14  185.78   94.59
   6  -1 -14  262.87   81.29
   5  -6  14  169.18   79.29
   1   5  14    2.50   55.19
  -5   7 -14  473.75  129.89
   7  -2 -14  228.48   75.49
   2   5  14  299.67   81.89
  -5   8 -14  239.18  115.69
   8  -3 -14  244.58   95.49
   3   5  14   82.69   64.19
   8  -6 -14  -55.89   61.29
  -2   8 -14   63.29   80.89
  -2   8 -14  105.49   94.49
   6   2  14  -35.60   45.70
   7  -6 -14   76.59   77.59
  -1   7 -14  134.39   81.29
  -1   7 -14  168.68   94.89
   6   1  14   39.80   52.39
   6  -6 -14  -44.40   57.09
   0   6 -14   15.40   76.59
   0   6 -14   -6.30   66.09
  -6   6  14   63.99   80.69
   6   0  14   22.00   50.59
   5  -6 -14   -6.90   61.59
   1   5 -14   19.70   70.89
   1   5 -14  156.18   66.79
   6  -1  14  -11.90   56.59
  -5   6  14   40.90   75.69
   6  -1  14  -22.90   71.19
   4  -6 -14   49.60   64.89
   2   4 -14   -6.20   52.99
  -4   6  14   25.50   69.49
   6  -2  14 -112.99   82.99
   6  -2  14   52.19   61.29
   3   3 -14   66.29   60.89
   6  -3  14  -31.30   95.49
   6  -3  14  -97.19   44.20
  -3   6  14  237.58   89.99
   4   2 -14  191.38   77.49
  -6   4 -14  171.18  118.69
   6  -4  14  193.08  119.89
   6  -4  14  100.09   67.29
   5   1 -14   80.09   62.09
  -6   5 -14   49.10   77.29
   6  -5  14  116.89   74.09
  -1   6  14   60.49   62.69
   6  -5  14  298.57  108.99
  -6   6 -14   97.99   91.09
   6   0 -14   43.00   57.89
   0   6  14   10.80   52.59
   6  -6  14   18.80   65.99
  -6   7 -14  -10.90   95.89
   7  -1 -14   -2.40   52.09
   6  -7  14   20.50   72.89
   1   6  14  -63.49   50.99
  -6   8 -14  259.47  120.29
   8  -2 -14  105.59   69.49
   2   6  14  -21.10   55.99
   8  -7 -14  -24.10   72.29
  -1   8 -14  154.58   92.49
  -1   8 -14  142.09   90.29
   7   1  14   51.59   59.09
   7  -7 -14  -42.80   73.49
   0   7 -14  -35.00   71.29
   0   7 -14  101.89   86.09
   7   0  14   36.80   59.29
   6  -7 -14   14.30   68.99
   1   6 -14   41.00   70.79
   1   6 -14   12.40   75.79
   7  -1  14   53.09   57.59
  -6   7  14  -17.30   76.29
   2   5 -14   11.50   62.79
   5  -7 -14  190.18  127.39
   2   5 -14  142.79   77.59
   7  -2  14  257.47   80.89
   7  -2  14  102.59   85.39
  -5   7  14  120.09   89.39
   3   4 -14   -2.20   63.99
   7  -3  14   55.09   62.79
   7  -3  14  173.58   94.89
  -4   7  14  137.29   89.89
   4   3 -14   45.00   63.99
   7  -4  14  -21.30   63.29
   7  -4  14  124.99   92.69
  -3   7  14   62.19   79.29
   5   2 -14   24.50   55.59
   7  -5  14   31.30   69.69
   7  -5  14   67.39   95.19
  -2   7  14  -66.79   73.19
   6   1 -14   91.59   65.19
   7  -6  14  142.99   87.59
   7  -6  14   82.39   99.79
  -1   7  14 -133.29   68.99
   7   0 -14  118.69   72.59
  -7   7 -14  -12.70   94.69
   7  -7  14   77.39   76.29
  -7   8 -14   55.69  120.99
   8  -1 -14  -18.90   58.89
   1   7  14  187.18   79.79
   7  -8 -14  102.19  145.39
   1   7 -14  148.19   94.79
   1   7 -14  116.59   97.99
   8  -1  14  161.18   69.99
  -7   8  14  182.98   98.59
   2   6 -14  -34.00   58.39
   2   6 -14 -114.09   72.69
   8  -2  14   24.70   61.19
  -6   8  14  219.68  104.99
   8  -2  14   97.99   79.09
   3   5 -14   60.79   68.29
  -5   8  14  -25.90   95.69
   8  -3  14  159.58   87.89
   8  -3  14   50.49   65.49
   4   4 -14   57.39   69.89
   8  -4  14   -6.80   81.89
  -4   8  14  133.89  105.29
   8  -4  14   26.50   64.99
   5   3 -14   57.89   66.09
   8  -5  14  -60.99   74.79
   8  -5  14   16.90   76.59
  -3   8  14  -43.00   85.59
   6   2 -14  -23.40   55.79
   8  -6  14   61.29   96.69
  -2   8  14   53.79   86.49
   8  -6  14   71.49   79.09
   7   1 -14  -49.20   62.89
   8  -7  14  155.68  113.69
  -1   8  14   30.70   85.69
   8  -7  14  208.08  100.29
   0   0 -15  661.93  102.19
   0   0  15  776.32  100.99
   0   0  15  813.22  120.29
   1  -1 -15  599.04  106.39
  -1   0 -15  536.25   98.19
   0   1 -15  429.56   92.19
   1   0  15  501.25   88.89
   1   0  15  548.55  110.19
   0  -1  15  508.25   96.49
  -1   1  15  616.64  103.09
   0  -1  15  577.64  112.09
  -1   1  15  588.24  105.39
   1   0 -15   54.29   56.49
   0  -1 -15   40.80   53.89
  -1   1 -15  -52.79   60.19
  -1   0  15   66.79   68.19
  -1   0  15   74.29   55.69
   0   1  15   -0.50   47.20
   0   1  15   77.59   68.19
   1  -1  15   42.80   54.49
   1  -1  15  116.99   81.09
  -1   2 -15   43.40   57.49
  -1  -1 -15   17.60   58.09
   2  -1 -15   15.60   53.99
  -2   1  15   48.90   70.89
   1   1  15  -10.20   50.99
   1  -2  15   14.70   51.49
   1   1  15   64.79   77.49
  -2   1  15   74.29   50.39
   3  -2 -15  109.49   62.49
  -2  -1 -15    9.50   55.59
  -1   3 -15  -65.39   57.69
  -3   2  15    8.30   59.09
   1  -3  15  -33.50   41.30
   2   1  15  -20.50   63.39
   2   1  15   40.30   55.09
  -3   2  15   69.49   59.99
  -2   0 -15   92.99   61.19
   2  -2 -15   30.20   57.69
   0   2 -15  -21.90   57.49
  -2   2  15  119.59   69.19
   0  -2  15   61.69   53.59
   2   0  15  -27.60   88.29
  -2   2  15    8.20   52.19
   2   0  15  -81.69   43.10
  -2   1 -15  494.15   96.99
   1  -2 -15  611.64  101.99
   1   1 -15  491.45   95.29
  -1   2  15  596.44  100.29
  -1   2  15  411.26   93.69
   2  -1  15  816.52  145.99
  -1  -1  15  665.23   98.39
   2  -1  15  699.53  101.89
   0  -2 -15  222.18   74.39
   2   0 -15  252.67   74.09
  -2   2 -15  216.98   78.69
   0   2  15  190.68   59.39
  -2   0  15  473.25   88.99
  -2   0  15  248.98   87.29
   2  -2  15  245.88   76.79
   2  -2  15  288.07  116.49
   0   2  15  220.08   82.59
  -2   3 -15  167.68   78.69
   3  -1 -15  137.49   63.99
  -1  -2 -15  164.68   67.59
   2  -3  15  255.67   77.29
   1   2  15  221.58   86.89
  -3   1  15  242.88   89.79
  -3   1  15  160.78   67.59
   1   2  15  162.18   64.19
   4  -2 -15   -0.60   55.19
  -2   4 -15  -62.49   66.09
   2   2  15  102.69   62.99
  -4   2  15  167.08   67.69
   2  -4  15  -23.40   54.89
  -2   5 -15  -39.80   75.69
   5  -3 -15  123.19   65.79
  -5   3  15   52.09   50.79
   3   2  15   -6.20   51.09
   4  -3 -15  129.19   75.49
  -1   4 -15   96.79   75.29
   3   1  15   85.99   57.49
  -4   3  15  172.48   61.89
   3   1  15   96.69   73.89
   0   3 -15  156.68   74.69
  -3   0 -15   12.90   53.89
   3  -3 -15  124.79   70.49
   3   0  15   85.99   77.29
  -3   3  15  124.99   62.89
  -3   3  15  -19.80   58.79
   3   0  15   49.10   54.59
   1   2 -15  634.14  110.39
   2  -3 -15  437.76   94.99
  -3   1 -15  496.45  100.09
  -2   3  15  510.85  102.79
  -2   3  15  588.24   98.89
   3  -1  15  400.46   87.79
   3  -1  15  568.64  118.59
  -3   2 -15  321.77   91.39
   2   1 -15  156.38   66.29
   1  -3 -15   85.59   62.49
   3  -2  15  201.08   93.39
  -1   3  15  204.18   65.99
   3  -2  15  100.69   61.59
  -1   3  15  158.68   74.59
  -3   3 -15   14.40   61.49
   3   0 -15  -12.90   56.99
   0  -3 -15   59.69   62.09
   0   3  15   34.50   56.19
   3  -3  15    2.30   53.09
   4  -1 -15  117.49   63.19
  -3   4 -15  -32.00   71.79
   1   3  15  116.29   58.29
   3  -4  15   91.89   59.39
  -4   1  15  -42.10   62.69
   5  -2 -15  -64.49   52.19
  -3   5 -15   53.39   77.79
  -5   2  15   -7.80   60.29
   3  -5  15   14.60   54.29
   2   3  15   20.50   57.29
  -3   6 -15   89.09   84.39
   6  -3 -15  -28.80   55.79
   3   3  15  -43.50   53.09
   7  -4 -15  154.28   86.09
  -3   7 -15  210.98  107.59
   4   3  15   84.69   74.79
  -2   6 -15   33.10   88.79
  -2   6 -15   19.60   65.39
   6  -4 -15   32.00   62.29
   4   2  15  -19.80   43.10
  -1   5 -15   86.99   85.59
   5  -4 -15  118.29   69.29
  -1   5 -15   40.30   63.69
   4   1  15   -3.50   53.29
  -5   4  15  138.49   72.59
   4  -4 -15  171.98   74.89
   0   4 -15   98.19   67.39
   4   0  15   81.59   80.19
  -4   4  15  138.69   74.29
   4   0  15  158.38   65.29
   3  -4 -15  127.59   68.29
   1   3 -15  104.29   75.59
   4  -1  15  251.07   74.39
   4  -1  15  226.08   97.49
  -3   4  15  201.08   75.19
  -4   2 -15  -33.90   58.69
   2   2 -15   73.09   64.09
   2  -4 -15    7.30   61.09
   4  -2  15   30.60   56.39
  -2   4  15  -35.80   50.59
   4  -2  15   -9.10   72.99
  -4   3 -15  294.87   91.99
   3   1 -15  236.28   75.09
   1  -4 -15  193.38   79.99
   4  -3  15  247.58   82.39
   4  -3  15  280.47  102.39
  -1   4  15  256.17   77.89
  -4   4 -15    9.20   72.09
   4   0 -15  161.58   64.09
   0   4  15  125.59   60.49
   4  -4  15   39.40   68.89
  -4   5 -15 -136.19   72.09
   5  -1 -15  -31.10   53.89
  -5   1  15   -3.20   65.39
   4  -5  15 -108.69   52.89
   1   4  15   98.39   65.29
  -4   6 -15   83.49   88.79
   6  -2 -15   -6.70   59.49
   2   4  15   38.90   57.69
   7  -3 -15  214.28   80.59
  -4   7 -15  278.87  113.99
   3   4  15   67.09   66.89
   8  -4 -15   95.09   77.39
  -4   8 -15  -13.70  104.09
   4   4  15   54.09   60.79
   8  -5 -15  -23.60   63.09
  -3   8 -15   10.60   88.49
   5   3  15   11.50   54.19
   7  -5 -15  217.38   86.39
  -2   7 -15  227.18   93.59
  -2   7 -15  -28.00   68.19
   5   2  15  111.19   65.09
  -1   6 -15  148.19   77.89
   6  -5 -15   65.69   72.69
  -1   6 -15   99.99   85.09
   5   1  15   24.00   52.59
   0   5 -15   66.89   75.19
   5  -5 -15   87.19   71.29
   5   0  15   36.90   71.69
   5   0  15  -13.90   49.00
  -5   5  15  -84.29   61.89
   1   4 -15  188.48   80.19
   4  -5 -15  297.57   92.19
   5  -1  15  124.19   60.59
  -4   5  15   44.40   70.39
   5  -1  15  124.49   95.69
   2   3 -15  189.78   85.59
   3  -5 -15  267.97   78.99
   5  -2  15  314.67  108.19
   5  -2  15  279.07   90.09
   3   2 -15   -5.70   53.59
  -5   3 -15  176.48   75.09
   5  -3  15   60.29   64.59
   5  -3  15   55.79   81.69
  -2   5  15   30.20   59.99
  -5   4 -15  251.77   93.99
   4   1 -15  174.78   71.49
  -1   5  15  148.29   69.29
   5  -4  15  334.37   87.69
   5  -4  15  311.67  111.19
  -5   5 -15   94.39   93.19
   5   0 -15   59.09   63.49
   0   5  15  206.68   76.89
   5  -5  15  179.48   87.49
  -5   6 -15  117.69   95.39
   6  -1 -15   16.80   59.79
   5  -6  15   10.30   68.39
   1   5  15  116.49   67.49
   7  -2 -15   33.70   62.59
  -5   7 -15  238.48  112.79
   2   5  15   38.20   60.29
   8  -3 -15   -0.90   71.49
  -5   8 -15    4.50  105.89
   3   5  15   71.49   66.49
  -2   8 -15   65.99   97.79
   8  -6 -15   78.99   84.49
   6   2  15   13.70   52.99
  -1   7 -15  -97.79   72.89
  -1   7 -15  -71.59   80.59
   7  -6 -15   62.39   77.29
   6   1  15  -84.39   42.60
   0   6 -15  156.18   91.69
   6  -6 -15  110.79   75.49
   0   6 -15   76.19   74.09
  -6   6  15  226.28   90.99
   6   0  15  112.39   64.49
   1   5 -15  311.57   85.69
   5  -6 -15   80.79   77.39
   6  -1  15  284.87  103.39
  -5   6  15  343.27  106.89
   6  -1  15  192.98   79.39
   2   4 -15   51.19   61.99
   4  -6 -15  -26.80   54.99
   6  -2  15 -139.89   72.59
   6  -2  15   14.80   55.09
  -4   6  15  -44.80   65.79
   3   3 -15  134.79   74.69
  -3   6  15  133.99   84.39
   6  -3  15  108.29   67.69
   6  -3  15  159.08  106.49
   4   2 -15  369.46   89.19
   6  -4  15  363.06   96.49
   6  -4  15  433.86  136.99
   5   1 -15  118.79   68.29
  -6   5 -15   12.00   78.79
  -1   6  15  108.79   68.99
   6  -5  15  117.09  106.29
   6  -5  15   34.60   64.59
  -6   6 -15  225.78  112.19
   6   0 -15  264.07   81.79
   6  -6  15  156.08   92.09
   0   6  15  209.98   82.69
   7  -1 -15  164.58   77.89
  -6   7 -15  348.37  122.89
   1   6  15  247.78   83.89
  -6   8 -15  -91.19  103.09
   8  -2 -15  -44.60   66.39
   0   7 -15  -24.70   76.69
   7  -7 -15  213.48   97.49
   0   7 -15   47.60   85.09
   7   0  15  120.39   67.99
   6  -7 -15    3.30   67.89
   1   6 -15    6.70   63.09
   1   6 -15   -6.70   81.99
  -6   7  15  168.58  102.99
   7  -1  15  -12.70   54.39
   2   5 -15   54.79   75.49
   7  -2  15   92.29   66.39
  -5   7  15  -34.80   79.79
   7  -2  15  115.19   86.29
   3   4 -15  112.29   73.79
   7  -3  15  -15.40   58.59
  -4   7  15   22.00   93.09
   7  -3  15  122.39   90.59
   4   3 -15   57.29   65.59
   7  -4  15  273.37  111.29
  -3   7  15   -6.50   85.29
   7  -4  15   72.89   68.19
   5   2 -15  -28.00   61.29
  -2   7  15   11.60   89.09
   7  -5  15  -50.59   80.99
   7  -5  15  152.28   79.49
   6   1 -15   31.60   61.59
   7  -6  15  130.39   88.39
   7  -6  15   57.69  105.79
   7   0 -15   31.50   59.39
  -7   7 -15   80.29  109.49
   7  -7  15  -82.89   69.59
   0   7  15   -7.30   63.99
   2   6 -15   75.69   75.99
   8  -2  15  120.19   76.39
   3   5 -15  -36.10   68.29
  -5   8  15   59.79  104.09
   8  -3  15   17.40   81.09
   8  -3  15  -10.50   63.79
   4   4 -15   -0.30   60.49
   8  -4  15  -30.80   61.99
  -4   8  15  129.49   99.19
   8  -4  15   -1.80   79.39
   5   3 -15  -28.40   61.09
   8  -5  15 -125.39   80.79
  -3   8  15   26.80  102.39
   8  -5  15   19.20   79.99
   6   2 -15   74.89   63.39
   8  -6  15  -71.79   79.19
   0   0 -16  197.88   70.39
   0   0  16  330.27  105.19
   0   0  16  471.25   92.59
   0   1 -16  187.38   77.99
  -1   0 -16  310.47   83.69
   1  -1 -16   76.69   63.09
  -1   1  16  115.49   72.69
   1   0  16  160.78   64.29
   0  -1  16  191.18   69.99
  -1   1  16   30.20   72.29
   0  -1  16  183.28   95.09
   1   0  16  197.28   94.09
   0  -1 -16  243.78   84.89
   1   0 -16  208.88   75.19
  -1   1 -16  144.49   75.49
   1  -1  16  253.27  106.89
   0   1  16  195.38   71.59
  -1   0  16   81.09   57.89
   1  -1  16  288.27   83.59
   0   1  16  236.88   95.39
  -1   0  16  286.57  101.09
  -1  -1 -16  139.29   71.09
  -1   2 -16  135.69   77.49
   2  -1 -16  148.29   71.29
  -2   1  16  131.69   80.49
   1   1  16   69.39   69.69
   1  -2  16  207.48   76.49
  -2   1  16  176.78   70.19
   1   1  16  214.08   75.79
   3  -2 -16  -89.79   49.20
  -1   3 -16   13.80   72.59
  -2  -1 -16   97.09   96.49
   1  -3  16  -18.50   51.39
  -3   2  16   -4.50   53.99
  -3   2  16  -19.30   51.99
   2   1  16  -10.90   52.09
   2   1  16   12.70   66.79
   2  -2 -16  197.38   79.99
   0   2 -16  212.48   86.09
  -2   0 -16  133.89   75.89
   2   0  16  143.09   70.09
  -2   2  16  299.97   82.29
   2   0  16  218.68   90.59
  -2   2  16  232.28   84.19
   0  -2  16   -2.60   52.59
  -2   1 -16   76.19   67.69
   1  -2 -16   74.89   62.99
   1   1 -16   52.69   68.59
  -1   2  16   21.90   61.09
  -1   2  16   63.09   61.39
  -1  -1  16  112.39   63.69
   2  -1  16  -72.59   45.80
   2  -1  16    6.70   71.89
   2   0 -16  299.97   87.99
   0  -2 -16  404.66   84.89
  -2   2 -16  397.26   95.59
   2  -2  16  269.17  101.29
   2  -2  16  247.38   80.89
  -2   0  16  374.86   86.49
   0   2  16  439.46   97.39
  -2   0  16  208.08   89.59
   0   2  16  235.48   83.49
  -2   3 -16  404.16  100.89
  -1  -2 -16  355.96   96.69
   3  -1 -16  196.38   78.59
   1   2  16  333.17   84.29
  -3   1  16  280.27   94.69
   2  -3  16  386.86   93.09
  -3   1  16  180.68   82.89
   1   2  16  427.66   98.29
   4  -2 -16  128.69   68.19
  -2   4 -16   40.00   68.29
  -4   2  16   97.09   69.59
   2  -4  16   92.29   68.79
   2   2  16   64.79   63.69
   2   2  16   18.60   67.19
   5  -3 -16    1.50   66.19
  -2   5 -16   44.60   79.69
   3   2  16   22.60   54.19
   4  -3 -16    4.60   62.59
  -1   4 -16   42.60   70.89
   3   1  16  -39.10   58.69
   3   1  16  132.59   68.39
  -4   3  16   35.90   53.99
   3  -3 -16   67.69   69.99
   0   3 -16  -56.09   64.39
  -3   3  16   92.39   62.09
  -3   3  16   45.50   63.39
   3   0  16   21.10   56.09
   3   0  16   12.20   65.69
  -3   1 -16  272.07   84.69
   1   2 -16  184.78   80.39
   2  -3 -16  148.29   74.79
   3  -1  16  144.59   93.49
   3  -1  16  290.77   79.09
  -2   3  16  263.07   82.59
  -2   3  16  272.07   84.09
  -3   2 -16  234.78   89.39
   1  -3 -16  311.97   92.89
   2   1 -16  321.87   85.39
   3  -2  16  290.37   97.09
  -1   3  16  332.17   91.29
  -1   3  16  240.58   85.19
   3  -2  16  392.06   92.59
   3   0 -16  108.79   67.89
  -3   3 -16  256.07   88.49
   0   3  16  262.87   81.29
  -3   0  16   72.19   80.39
   3  -3  16  251.37   96.69
   3  -3  16  204.18   75.79
   4  -1 -16   83.09   62.09
  -3   4 -16   19.40   81.59
  -4   1  16   11.70   67.19
   1   3  16   82.29   63.59
   3  -4  16   44.40   63.49
   5  -2 -16   71.49   70.49
  -3   5 -16  179.68  100.59
   2   3  16   59.69   60.89
  -3   6 -16  224.78  108.59
   6  -3 -16   19.60   66.29
   3   3  16   73.59   53.79
  -3   7 -16  -24.50   88.29
   7  -4 -16  -26.20   65.89
   4   3  16  -27.10   55.59
  -2   6 -16  188.38  103.39
   6  -4 -16   90.09   71.09
   4   2  16   71.39   61.39
  -1   5 -16  -51.19   69.39
   5  -4 -16  -97.19   49.99
  -5   4  16   -3.70  106.69
   4   1  16   96.89   60.99
   4  -4 -16   15.50   64.29
   0   4 -16   43.80   78.99
  -4   4  16  179.18   79.39
   4   0  16  -20.10   76.09
   4   0  16  177.48   79.99
   3  -4 -16  251.17   90.49
   1   3 -16  165.48   89.89
  -3   4  16  237.78   70.29
   4  -1  16  285.87   84.79
   4  -1  16  374.46  110.89
   2  -4 -16  352.06   93.09
  -4   2 -16  279.57   88.19
   2   2 -16  221.68   87.29
   4  -2  16  213.18  107.49
  -2   4  16  310.47   95.19
   4  -2  16  503.65  103.79
   3   1 -16   46.80   64.69
  -4   3 -16   52.99   73.19
   4  -3  16    7.60   88.29
   4  -3  16   45.80   57.19
  -1   4  16   92.39   70.09
  -4   4 -16  -36.80   85.59
   4   0 -16  -79.69   43.10
   0   4  16  -16.90   56.39
   4  -4  16  107.89   68.49
  -4   5 -16  187.68  103.09
   5  -1 -16  -34.60   64.69
   4  -5  16    0.60   67.29
  -5   1  16  -43.90   94.49
   1   4  16  115.89   71.89
  -4   6 -16    6.70   99.59
   6  -2 -16   25.90   66.99
   2   4  16   -1.10   53.49
  -4   7 -16   84.79   97.49
   7  -3 -16   29.50   72.39
   3   4  16  197.48   72.59
  -2   7 -16 -128.59   84.69
   7  -5 -16  -39.90   56.09
   5   2  16  -17.70   47.50
   6  -5 -16  266.17   99.39
  -1   6 -16  219.98   85.59
  -1   6 -16  179.58  110.39
   5   1  16  172.48   73.69
   5  -5 -16  -10.60   60.99
   0   5 -16  263.27   93.49
  -5   5  16  335.67  103.69
   5   0  16  223.88   98.59
   5   0  16  233.58   76.29
   4  -5 -16  101.29   71.19
   1   4 -16   36.50   71.59
   5  -1  16   38.00   62.39
   5  -1  16  -40.90   72.59
  -4   5  16   -7.80   73.19
   2   3 -16   54.79   72.39
   3  -5 -16  -58.29   59.79
   5  -2  16  -27.80   82.39
   5  -2  16  120.39   65.29
   3   2 -16  409.26   95.09
   5  -3  16  266.67   90.59
   5  -3  16  522.75  134.49
  -2   5  16  277.67   95.59
  -5   4 -16   85.19   85.59
   4   1 -16  122.09   70.49
   5  -4  16  -69.79   89.29
  -1   5  16  -12.60   54.99
   5  -4  16  -41.70   64.79
  -5   5 -16  216.58   99.79
   5   0 -16  134.99   68.29
   5  -5  16   38.20   66.19
   0   5  16   31.10   61.99
  -5   6 -16  564.74  142.99
   6  -1 -16  234.18   83.29
   1   5  16  136.89   71.39
   5  -6  16  450.75  129.19
   7  -2 -16   27.60   59.29
  -5   7 -16   84.99  103.79
   2   5  16   51.59   62.19
  -1   7 -16   16.00   89.09
  -1   7 -16  125.59   93.79
   7  -6 -16   18.60   71.89
   6   1  16  -39.10   60.59
   6  -6 -16  -10.30   69.59
   0   6 -16 -115.09   63.59
   0   6 -16  109.29   84.29
   6   0  16   -6.70   53.09
   1   5 -16  166.58   88.19
   5  -6 -16  179.28   84.79
  -5   6  16  100.69   89.19
   6  -1  16  137.99   93.49
   6  -1  16   55.19   56.09
   2   4 -16   86.99   78.59
   6  -2  16  191.48   86.39
  -4   6  16  129.79   96.89
   6  -2  16  332.27  116.79
   3   3 -16   59.69   56.79
  -3   6  16   38.80   85.29
   6  -3  16   93.69   92.89
   6  -3  16   23.60   67.29
   4   2 -16  118.19   71.09
   6  -4  16   91.39   72.69
   6  -4  16  279.47  117.19
  -6   5 -16  -77.19  112.59
   5   1 -16  155.38   78.69
   6  -5  16   46.70  100.39
  -1   6  16  109.19   74.69
   6  -5  16   42.70   73.99
  -6   6 -16   -2.00   84.99
   6   0 -16  157.98   76.59
   0   6  16   -1.00   64.49
   6  -6  16   84.59   78.49
   7  -1 -16  -90.09   51.39
  -6   7 -16  193.38  113.59
   1   6  16  192.98   87.89
   1   6 -16   35.30   74.29
   6  -7 -16  185.48   98.99
  -6   7  16   96.09  100.09
   7  -1  16  103.49   72.99
   2   5 -16   25.60   70.59
   7  -2  16    4.40   71.19
  -5   7  16  193.48  107.09
   7  -2  16  -29.80   61.99
   3   4 -16  128.19   77.29
  -4   7  16  127.39  103.59
   7  -3  16  -10.50   78.29
   7  -3  16  108.49   75.99
   4   3 -16   25.10   67.79
   7  -4  16  -56.99   83.39
  -3   7  16  -35.70   89.69
   7  -4  16  198.18   89.09
   5   2 -16  -57.49   56.39
   7  -5  16  -52.09   67.49
   7  -5  16  -16.60   90.99
  -2   7  16   22.80   91.29
   6   1 -16   79.69   69.19
   7  -6  16  106.69  108.79
   7  -6  16  141.59   93.79
   0   0 -17    1.60   60.09
   0   0  17    6.20   73.79
   0   0  17    6.90   57.09
  -1   0 -17   81.39   71.69
   0   1 -17   74.29   71.09
   1  -1 -17  -59.79   55.89
  -1   1  17   54.09   78.29
   1   0  17  107.49   69.19
   1   0  17   97.19   89.59
  -1   1  17   28.90   54.69
   0  -1  17   82.99   66.49
   0  -1  17   77.69   87.59
   1   0 -17  405.96   91.79
  -1   1 -17  440.36  100.29
   0  -1 -17  209.08   77.19
   0   1  17  304.97   90.59
  -1   0  17  483.25  117.39
  -1   0  17  361.66   89.09
   1  -1  17  468.45   97.59
   1  -1  17  333.77  106.49
   0   1  17  360.76  101.89
  -1   2 -17  -26.30   63.39
  -1  -1 -17   62.79   67.59
   2  -1 -17   -9.20   55.49
   1  -2  17   37.50   58.89
   1   1  17   50.19   78.89
   1   1  17   74.19   63.49
  -2   1  17  -55.59   59.49
   1  -2  17  -79.19   82.19
  -2   1  17  -51.89   53.09
  -1   3 -17  -32.10   70.19
   3  -2 -17   85.39   69.79
   2   1  17    8.00   53.39
   2   1  17   59.19   68.99
  -3   2  17   59.79   69.49
  -3   2  17   71.89   64.49
   2  -2 -17  208.88   77.99
   0   2 -17  179.28   88.59
  -2   0 -17  153.68   78.29
   2   0  17  125.09   92.19
   0  -2  17  185.18   84.59
  -2   2  17  135.49   80.69
   2   0  17  167.68   76.19
  -2   2  17  167.48   80.59
  -2   1 -17  923.71  127.99
   1   1 -17 1049.79  128.79
   1  -2 -17  759.62  118.39
  -1  -1  17  668.43  128.59
   2  -1  17  652.63  113.19
  -1   2  17  745.73  118.59
  -1   2  17  716.23  120.19
   2  -1  17  732.53  131.09
  -1  -1  17  819.32  117.49
   2   0 -17   17.30   59.39
  -2   2 -17  309.07   93.49
   0  -2 -17  -58.69   56.79
   2  -2  17  -46.60   81.39
   2  -2  17  -95.29   47.90
  -2   0  17   32.10   75.69
   0   2  17  -44.10   49.90
   0   2  17   36.60   69.19
  -2   0  17  -86.89   81.29
  -2   3 -17   84.39   85.89
   3  -1 -17  137.49   80.09
   2  -3  17  203.88   77.99
  -3   1  17  161.08   86.99
   1   2  17  118.29   71.49
   1   2  17  136.89   84.79
  -2   4 -17  359.86  111.09
   4  -2 -17  205.78   84.09
  -4   2  17  183.98   86.99
   2   2  17  209.98   73.19
   2   2  17  177.78   88.29
  -2   5 -17  -50.99   78.99
   5  -3 -17 -111.89   55.99
   3   2  17   67.29   66.19
  -1   4 -17  -62.59   72.09
   4  -3 -17  211.78   85.29
   3   1  17   66.89   66.89
   3   1  17  103.19   87.39
  -4   3  17   -5.90   55.09
   3  -3 -17  -29.00   69.19
   0   3 -17   -0.30   73.59
   3   0  17  -80.79   69.99
  -3   3  17 -106.89   56.29
   3   0  17   12.00   56.09
  -3   3  17   13.00   60.89
   1   2 -17  145.69   80.09
  -3   1 -17  -21.30   62.69
   2  -3 -17   -7.40   68.09
   3  -1  17   95.99   62.89
  -2   3  17    1.90   66.09
   3  -1  17 -101.29   76.29
  -2   3  17  164.88   89.19
  -3   2 -17   36.80   75.99
   1  -3 -17  -50.69   62.29
   2   1 -17   63.19   65.39
  -1   3  17   89.29   71.59
  -1   3  17   41.90   67.99
   3  -2  17  187.28  104.59
   3  -2  17  113.29   75.89
   3   0 -17   36.10   60.09
  -3   3 -17    5.70   76.09
   3  -3  17   67.69   70.89
   0   3  17   16.50   61.59
  -3   0  17  -80.99   71.39
   3  -3  17  140.19  103.79
   4  -1 -17  -59.19   59.29
  -3   4 -17   -7.40   81.99
  -4   1  17  -82.29   77.09
   3  -4  17  106.09   72.99
   1   3  17   15.00   50.39
  -3   5 -17  165.28  101.29
   5  -2 -17  529.85  111.79
   2   3  17  327.57   87.99
  -3   6 -17   48.80   97.99
   6  -3 -17   24.40   73.29
   3   3  17   89.69   71.09
   7  -4 -17  -36.40   66.39
  -3   7 -17   67.09  109.69
   4   3  17   25.50   63.69
   6  -4 -17  171.28   88.29
  -2   6 -17  247.18  120.49
   4   2  17  117.19   68.59
   5  -4 -17   84.99   78.89
  -1   5 -17  -60.79   74.19
   4   1  17   52.99   66.79
   4  -4 -17  -10.90   75.99
   0   4 -17  -94.39   71.49
  -4   4  17   -9.40   74.49
   4   0  17   -0.10   62.29
   4   0  17   38.40   74.49
   1   3 -17   41.30   84.19
   3  -4 -17  -51.49   54.29
   4  -1  17   -1.90   77.09
   4  -1  17   25.20   59.99
  -3   4  17   26.90   67.49
   2  -4 -17  159.98   84.39
   2   2 -17  293.57   96.69
   4  -2  17   34.10   94.59
  -2   4  17   61.29   68.49
   4  -2  17   32.30   61.09
  -4   3 -17   69.79   82.69
   3   1 -17   79.49   70.99
  -1   4  17    0.70   58.89
   4  -3  17  -57.79   53.89
   4  -3  17   31.20   88.49
   4   0 -17   49.80   67.19
  -4   4 -17  -71.89   63.69
  -4   0  17  151.98   94.59
   4  -4  17  252.57  120.19
   4  -4  17   65.79   71.49
   0   4  17   55.09   64.19
   5  -1 -17  113.49   69.89
  -4   5 -17  164.28  102.99
   4  -5  17  227.48   86.59
   1   4  17   16.90   65.99
   6  -2 -17  -40.70   66.89
  -4   6 -17   38.10   99.59
   2   4  17   24.20   67.49
   7  -3 -17   12.90   73.59
  -4   7 -17  -49.20  109.99
   3   4  17   62.69   63.99
  -1   6 -17  -56.09   88.79
   6  -5 -17  -24.10   79.89
   5   1  17   59.59   62.99
   0   5 -17  321.77  112.89
   5  -5 -17   91.89   79.59
   5   0  17   93.99   87.29
   5   0  17  231.88   85.49
  -5   5  17  -21.50   76.79
   1   4 -17  373.66  110.89
   4  -5 -17   81.99   70.99
   5  -1  17  177.28  108.09
  -4   5  17   30.30   86.69
   5  -1  17   87.09   66.69
   2   3 -17  321.17   98.99
   5  -2  17  228.48   83.69
   5  -2  17  208.48  104.69
   3   2 -17  136.39   76.59
  -2   5  17  -48.40   55.79
   5  -3  17  -24.60   55.99
   5  -3  17   17.80   97.09
   4   1 -17  122.79   72.49
  -5   4 -17  146.19   79.39
   5  -4  17  130.69   84.99
   5  -4  17   14.90   97.89
  -1   5  17  172.28   81.29
   5   0 -17   -9.40   58.09
  -5   5 -17  -86.79   88.49
   5  -5  17   20.50   75.49
   0   5  17   69.79   70.49
   6  -1 -17  105.49   76.19
  -5   6 -17  104.09  106.69
   1   5  17  256.87   84.89
   0   6 -17  125.39   97.39
   6  -6 -17  198.18   91.99
   6   0  17  304.87   90.19
   1   5 -17  -26.20   78.49
   5  -6 -17  -98.39   59.59
   6  -1  17   64.99   80.19
   6  -1  17 -103.49   48.40
  -5   6  17  -56.99   92.49
   2   4 -17   46.00   76.39
   6  -2  17   37.80   67.09
   6  -2  17    3.70   85.59
  -4   6  17  -79.69   86.39
   3   3 -17   58.49   79.09
  -3   6  17   19.90   88.39
   6  -3  17  -40.20   79.89
   6  -3  17  112.79   88.19
   4   2 -17   35.50   66.69
  -2   6  17   58.89   71.79
   6  -4  17    5.60   82.69
   6  -4  17  -66.29   91.09
   5   1 -17  183.78   82.59
   6  -5  17  104.89   84.19
   6  -5  17   -7.80  101.79
  -1   6  17   49.60   75.79
   6   0 -17   29.50   64.19
  -6   6 -17  -44.80   93.89
   6  -6  17  267.57  103.79
   0   6  17  127.09   82.09
   3   4 -17   68.39   81.79
   7  -3  17    6.50   83.39
  -4   7  17   39.30   98.39
   7  -3  17  -43.90   69.79
   4   3 -17   -9.30   71.19
   7  -4  17    0.70   71.59
   7  -4  17  -26.30   88.79
  -3   7  17 -175.48   87.79
   0   0 -18  815.72  122.29
   0   0  18  802.52  142.99
   0   0  18  844.62  128.09
   0   1 -18  302.27   92.09
  -1   0 -18  300.37   88.89
   1  -1 -18  276.27   99.29
   1   0  18  185.18   99.99
   1   0  18  231.28   83.89
   0  -1  18  140.49  105.59
  -1   1  18  457.75  105.49
   0  -1  18  241.28   82.99
  -1   1  18  277.17  101.49
  -1   1 -18   19.80   73.29
   0  -1 -18  106.09   72.09
   1   0 -18   -0.50   60.19
   1  -1  18   32.80  100.59
   0   1  18 -134.09   60.89
   1  -1  18   84.59   70.89
  -1   0  18   13.30   87.99
   0   1  18  -39.10   60.79
  -1   0  18   46.00   67.39
   2  -1 -18   54.39   73.19
  -1  -1 -18   65.39   75.29
  -1   2 -18   17.70   81.79
   1  -2  18   -4.90   66.29
  -2   1  18   16.90   94.19
   1   1  18  -83.19   79.59
  -2   1  18  -47.80   54.79
   1  -2  18  169.68  121.19
   1   1  18   65.59   65.09
   3  -2 -18  -53.99   63.09
  -1   3 -18  112.99   91.69
  -3   2  18  -12.90   62.99
  -3   2  18   70.89   70.09
   2   1  18   31.30   80.99
   2   1  18   71.69   64.99
  -2   0 -18  -96.29   56.29
   2  -2 -18  176.78   76.89
   0   2 -18    5.30   78.59
   2   0  18  -34.90   82.59
  -2   2  18  -13.60   71.59
   2   0  18   81.29   75.29
  -2   2  18    5.50   57.39
  -2   1 -18  488.75  103.49
   1  -2 -18  265.17   89.09
   1   1 -18  226.18   85.99
  -1   2  18  275.87  101.79
  -1  -1  18  684.33  147.39
   2  -1  18  199.88  119.29
  -1   2  18  161.78   80.99
   2  -1  18  544.95  112.49
  -2   2 -18  360.26  110.09
   0  -2 -18   35.10   72.09
   2   0 -18  114.19   71.89
  -2   0  18  366.96  122.89
   2  -2  18   83.19  116.19
   2  -2  18   99.59   73.99
   0   2  18   15.70   79.19
   0   2  18   11.90   63.49
  -2   3 -18 -154.58   72.09
   3  -1 -18  -48.70   57.79
   1   2  18   11.00   78.39
   1   2  18   40.80   64.29
  -3   1  18   13.00   77.09
   2  -3  18  -43.10   56.09
  -2   4 -18  209.08  110.99
   4  -2 -18  268.97   88.79
  -4   2  18  385.26   97.39
   2   2  18  335.67   92.79
   2   2  18  199.38   92.49
  -2   5 -18   64.89   93.69
   5  -3 -18   59.79   84.79
   3   2  18  104.89   69.89
  -1   4 -18   42.50   84.99
   4  -3 -18  156.18   90.99
  -4   3  18    2.90   57.69
   3   1  18   -6.50   55.29
   3   1  18  -88.69   64.79
   0   3 -18  296.37  108.59
   3  -3 -18  180.68   84.99
   3   0  18  115.69   91.79
  -3   3  18   87.49   68.19
   3   0  18  198.88   81.59
  -3   3  18   98.29   78.49
   1   2 -18  289.87  103.19
   2  -3 -18  298.67   95.49
   3  -1  18  161.98   77.29
  -2   3  18  215.68   85.99
  -2   3  18  186.78   92.79
   3  -1  18  151.78   93.59
   1  -3 -18  -21.90   66.29
  -3   2 -18  124.89   81.59
   2   1 -18   97.29   70.79
  -1   3  18  102.59   82.89
   3  -2  18   83.39   98.69
   3  -2  18   70.29   66.09
  -1   3  18   25.10   64.49
  -3   3 -18  -36.50   80.29
   3   0 -18  -39.40   62.19
   3  -3  18  123.49   90.99
   3  -3  18   56.49  107.19
   0   3  18  111.79   69.19
  -3   0  18   19.90   89.99
   4  -1 -18   21.90   66.99
  -3   4 -18  -69.29   85.89
   3  -4  18   59.49   74.19
   1   3  18   83.79   75.19
  -4   1  18   58.49   79.19
   5  -2 -18  -61.19   63.29
  -3   5 -18  -40.90   86.39
   2   3  18   50.29   65.99
  -3   6 -18   21.80  104.89
   6  -3 -18   10.40   76.09
   3   3  18   18.30   65.39
   6  -4 -18   36.40   80.79
  -2   6 -18  -36.20   93.29
   4   2  18  -45.40   55.79
   5  -4 -18   87.89   80.39
  -1   5 -18  -31.00   83.29
   4   1  18   61.19   69.39
   0   4 -18   88.59   89.69
   4  -4 -18  131.69   87.49
   4   0  18   76.19   69.99
   4   0  18   23.70   81.79
  -4   4  18  -99.09   69.09
   3  -4 -18  -48.10   65.59
   1   3 -18    9.30   85.89
  -3   4  18   52.89   62.69
   4  -1  18  -35.80   62.39
   4  -1  18   36.00   82.89
   2   2 -18  -61.19   54.39
   4  -2  18  -72.89   86.59
   4  -2  18   -3.00   68.69
  -2   4  18  -41.80   68.69
  -4   3 -18   23.90   79.09
   3   1 -18   70.99   69.69
  -1   4  18   45.60   76.49
   4  -3  18  -85.19   59.89
   4  -3  18  140.49  105.79
   4   0 -18   19.30   65.19
  -4   4 -18    3.50   86.39
   4  -4  18   -3.40   73.19
   4  -4  18  108.99   98.59
   0   4  18   -4.10   61.79
  -4   0  18  -85.29   84.19
   5  -1 -18  -36.20   62.09
  -4   5 -18  -62.49   89.39
   1   4  18  -74.79   59.39
   6  -2 -18  -43.40   69.09
  -4   6 -18   57.89  109.49
   2   4  18   92.69   66.79
   6  -5 -18  -23.10   77.89
  -1   6 -18  227.18  108.59
   5   1  18  109.39   70.79
   5  -5 -18   84.69   79.19
   0   5 -18   37.30   99.39
   5   0  18   31.20   63.29
   5   0  18   55.59   78.49
   1   4 -18   50.19   87.09
   4  -5 -18 -101.79   59.69
  -4   5  18   98.49   89.29
   5  -1  18   81.29   74.79
   5  -1  18  -21.70   74.09
   2   3 -18   32.10   78.49
   5  -2  18  121.89   86.99
  -3   5  18 -112.19   58.29
   5  -2  18    9.40   72.09
   3   2 -18  -12.30   65.09
   5  -3  18    9.60   83.69
   5  -3  18 -116.39   56.09
  -2   5  18   65.89   71.69
   4   1 -18   66.39   72.49
  -1   5  18  -18.40   66.69
   5  -4  18   29.80   68.99
   5  -4  18   60.89   91.49
  -5   5 -18   18.70   93.89
   5   0 -18  156.98   83.19
   5  -5  18   45.00  108.79
   0   5  18   14.50   72.39
   5  -5  18   77.59   75.59
   6  -1 -18  -51.19   67.39
  -5   6 -18 -161.38  100.39
   1   5  18   -8.60   64.39
   1   5 -18  357.76  119.99
   6  -1  18  -24.60   59.69
   6  -1  18  186.98  109.49
  -5   6  18    3.10   91.59
   2   4 -18  -78.29   83.89
   6  -2  18   28.90   90.39
  -4   6  18  -71.19   88.59
   6  -2  18  -35.00   59.09
   3   3 -18   80.59   72.89
   6  -3  18 -158.38   72.59
   6  -3  18   36.70   72.59
  -3   6  18   49.90  100.59
   4   2 -18   28.90   72.79
  -2   6  18   57.49   83.49
   6  -4  18   40.00   78.99
   6  -4  18  -13.40   95.59
   5   1 -18  -45.70   61.89
   6  -5  18  -18.50   83.29
   6  -5  18  -46.70  108.39
  -1   6  18  -35.00   66.99
   0   0 -19   32.60   71.39
   0   0  19   74.59   71.99
   0   0  19  181.58   93.99
   1  -1 -19  163.48   79.49
  -1   0 -19  173.88   87.59
   0   1 -19   97.59   78.99
   1   0  19   63.89   94.89
   0  -1  19   76.49   99.79
  -1   1  19   53.39   68.69
  -1   1  19   40.30   81.09
   1   0  19   81.69   73.69
   0  -1  19  127.09   78.49
   0  -1 -19  234.38   94.89
  -1   1 -19  335.67  110.19
   1   0 -19  182.58   89.09
   1  -1  19  253.57   87.69
  -1   0  19  104.39   74.69
  -1   0  19   43.00   99.79
   1  -1  19  299.57  131.09
   0   1  19  146.09   92.39
   0   1  19  317.87  100.09
   2  -1 -19   61.39   69.59
  -1   2 -19  -97.99   78.29
   1   1  19   27.70   70.69
   1  -2  19   83.89  108.09
  -2   1  19   26.90   85.29
   1   1  19   97.29   88.49
   1  -2  19   16.70   71.09
  -1   3 -19  416.86  116.79
   3  -2 -19  222.48   96.29
   2   1  19  217.48   98.99
  -3   2  19   79.49   76.09
   2   1  19  -27.90   65.89
   2  -2 -19  260.17   97.09
   0   2 -19   92.89   93.59
  -2   2  19  314.67   94.59
   2   0  19  182.88  102.29
  -2   2  19   77.39   75.49
   0  -2  19  527.95  133.49
   2   0  19   75.99   73.39
   1   1 -19   51.79   75.49
   1  -2 -19  161.88   79.89
  -2   1 -19  362.86  103.39
  -1   2  19   10.70   71.59
  -1  -1  19  290.17  124.99
   2  -1  19  -20.60   92.49
  -1   2  19  219.18   97.29
   2  -1  19  -37.60   64.69
   2   0 -19  -40.50   67.19
  -2   2 -19    9.70   91.39
   0   2  19  162.48   85.89
   2  -2  19  -17.90   95.29
   0   2  19   18.00   75.69
   2  -2  19   -0.20   68.19
  -2   0  19  -17.10   88.79
   3  -1 -19   13.00   74.69
  -2   3 -19   -3.10   89.99
  -3   1  19    5.60   79.69
   1   2  19  144.29   84.29
   2  -3  19  -93.59   95.79
   1   2  19    4.20   62.89
   4  -2 -19  -90.49   67.09
  -2   4 -19  180.08  113.99
   2   2  19   90.19   75.99
  -4   2  19   71.69   69.49
  -2   5 -19  170.98  107.79
   5  -3 -19   85.39   85.59
   3   2  19   45.00   79.79
   4  -3 -19  -68.19   70.29
  -1   4 -19  150.88  103.09
   3   1  19   80.89   74.39
  -4   3  19  104.39   69.69
   3   1  19  109.99   86.39
   0   3 -19  179.58  102.79
   3  -3 -19   -7.60   77.59
  -3   3  19  139.39   77.49
   3   0  19   34.10   70.79
   3   0  19   93.19   82.59
  -3   3  19  -13.00   65.79
   1   2 -19  232.18  102.49
   2  -3 -19   -2.70   72.09
  -2   3  19   -9.00   78.49
   3  -1  19   -5.20   85.89
  -2   3  19  106.09   80.19
   3  -1  19  107.59   71.19
   2   1 -19  163.38   87.89
  -3   2 -19  -46.30   78.99
   3  -2  19   -0.30   87.39
   3  -2  19   -4.00   66.49
  -1   3  19   46.50   79.29
  -2  -1  19  115.59  104.09
  -1   3  19  154.98   80.99
  -3   3 -19   41.60   97.49
   3   0 -19 -100.89   53.49
   0   3  19   -6.60   75.89
   3  -3  19   69.89   74.69
  -3   0  19  140.29   98.79
   3  -3  19  -64.79   86.39
   4  -1 -19  259.67   94.99
  -3   4 -19  -46.70   86.59
  -4   1  19  -72.79   72.09
   1   3  19  190.48   85.39
   5  -2 -19   25.10   82.69
  -3   5 -19    2.30   96.89
   2   3  19  -26.80   65.39
   5  -4 -19 -154.38   61.29
  -1   5 -19    9.70  102.69
   4   1  19   -4.50   65.39
   0   4 -19   13.60  103.19
   4  -4 -19  199.58   94.19
   4   0  19  198.58  101.79
   4   0  19  125.99   74.89
   3  -4 -19  -65.39   75.49
   1   3 -19   37.90   90.59
   4  -1  19  -62.19   78.99
  -3   4  19   89.29   68.59
   4  -1  19  -29.10   64.69
   2   2 -19  -17.10   69.79
   4  -2  19  -89.99   79.79
   4  -2  19  160.58   92.29
  -2   4  19  -16.20   66.89
   3   1 -19  -26.70   71.89
   4  -3  19  -41.70   72.89
  -1   4  19  -57.99   70.49
   4  -3  19   -5.10   90.19
  -4   4 -19   70.39   95.89
   4   0 -19  103.99   77.09
   4  -4  19  108.19   96.89
  -4   0  19   35.70   93.99
   4  -4  19  124.09   83.49
   0   4  19  130.09   84.29
   5  -1 -19   -4.70   68.79
  -4   5 -19  -28.60   97.49
   1   4  19   51.99   78.29
   1   4 -19  -13.20  100.89
   4  -5 -19   74.99  104.89
   5  -1  19  -32.30   66.09
  -4   5  19   47.30   89.09
   5  -1  19  153.98   92.19
   2   3 -19    8.90   96.59
  -3   5  19   63.69   74.59
   5  -2  19  -30.90   73.89
   5  -2  19  -16.60   84.49
   3   2 -19  -43.90   67.49
   5  -3  19  163.78  102.89
   5  -3  19  -94.39   60.69
  -2   5  19  -57.49   70.29
   4   1 -19  -72.49   61.99
   5  -4  19  -46.20   97.69
  -1   5  19   50.49   75.49
   5  -4  19   60.59   86.09
   0   0 -20   90.49   81.69
   0   0  20  110.59   80.99
   0   0  20  -11.10   86.19
  -1   0 -20 -126.39   62.49
   1  -1 -20  -36.90   68.49
   0   1 -20  125.49   92.89
   1   0  20    1.70   67.19
  -1   1  20  -45.60   69.09
   0  -1  20   34.50   93.19
   1   0  20    4.70   79.69
  -1   1  20   26.70   77.89
  -1   1 -20   30.20   81.09
   0  -1 -20  -43.60   64.49
   1   0 -20  -19.40   74.79
   0   1  20   10.10   75.69
   1  -1  20   96.99   78.79
   1  -1  20  187.28  104.39
  -1   0  20   38.00   90.09
   0   1  20   27.00   86.79
  -1   2 -20  190.48   94.59
   2  -1 -20  -39.80   75.89
  -2   1  20   25.20   81.09
   1  -2  20  -37.50   96.09
   1   1  20  -14.80   70.09
   1   1  20   62.99   88.19
  -1   3 -20  272.47  120.19
   3  -2 -20   74.09   85.99
  -3   2  20   24.60   71.19
   2   1  20   14.60   72.59
   2   1  20   27.30   89.19
   0   2 -20   18.80   87.79
   2  -2 -20   -2.90   73.59
  -2   2  20   95.69   81.99
   0  -2  20  151.18  119.89
  -2   2  20   90.39   80.39
   2   0  20   -4.00   78.99
   2   0  20   -7.40   72.79
   1  -2 -20   23.00   75.19
   1   1 -20  -58.29   67.29
  -2   1 -20  121.89   83.09
  -1   2  20  176.48   88.89
   2  -1  20   15.80   74.09
  -1   2  20  207.18   90.99
   2  -1  20  285.17  122.19
  -1  -1  20    7.70   95.29
  -2   2 -20   43.20   87.59
   2   0 -20  163.18   92.19
   2  -2  20  -66.19   87.79
   0   2  20  -13.40   71.89
   0   2  20   39.80   74.89
   2  -2  20   50.99   81.09
  -2   0  20   98.69   98.79
   3  -1 -20  181.38  100.09
  -2   3 -20  287.17  119.59
   1   2  20   28.20   83.49
  -3   1  20   85.29   86.09
   1   2  20  101.99   78.09
   2  -3  20  -22.10   98.39
   4  -2 -20   -0.60   75.89
  -2   4 -20   39.20  111.59
  -4   2  20    3.20   71.79
   2   2  20    1.10   75.59
  -1   4 -20  724.83  147.19
   4  -3 -20  298.67  115.19
  -4   3  20  146.79   84.39
   3   1  20  289.67  100.79
   3   1  20  384.46  118.29
   3  -3 -20   35.70   86.29
   0   3 -20  164.78  111.69
   3   0  20  100.49  101.19
   3   0  20  -66.69   64.99
  -3   3  20  -32.90   60.89
   1   2 -20   70.49   82.29
   2  -3 -20 -116.69   77.69
  -2   3  20  -21.60   69.69
   3  -1  20   34.10   92.09
   3  -1  20  -39.60   74.39
  -2   3  20  -89.09   72.69
   2   1 -20   60.09   85.49
  -1   3  20  -10.30   73.09
   3  -2  20  206.58   93.09
   3  -2  20   49.60  109.49
  -1   3  20  152.78   88.69
  -2  -1  20  174.48  114.39
  -3   3 -20   87.79   91.99
   3   0 -20  -32.70   68.19
   0   3  20  -39.80   65.79
   3  -3  20   67.49   68.29
  -3   0  20   32.80   92.69
   3  -3  20   94.29  103.89
   4  -1 -20 -100.19   66.99
  -3   4 -20  220.28  128.19
   1   3  20    5.90   67.69
   3  -4  20  -38.60  108.19
  -4   1  20   44.50   80.79
   0   4 -20  170.08  107.99
   4  -4 -20   41.00   85.59
   4   0  20   58.99   77.79
   1   3 -20   76.69  102.19
   4  -1  20   31.10   88.39
  -3   4  20  -50.59   72.79
   4  -1  20    1.80   82.19
   2   2 -20  -99.99   72.49
   4  -2  20  -68.59   67.89
   4  -2  20   97.59   98.19
  -2   4  20  -36.90   74.29
   3   1 -20  -54.09   68.49
   4  -3  20  -33.60  100.39
  -3  -1  20 -180.08   89.29
   4  -3  20   33.50   79.89
  -1   4  20  -43.60   70.69
   4   0 -20  251.47   94.69
  -4   4 -20  447.26  138.19
   0   0 -21  158.78   84.49
   0   0  21   19.70   72.49
   0   0  21  121.29   93.29
   1  -1 -21   77.99   84.79
   0   1 -21  -60.59   75.19
  -1   1  21  109.79   89.99
  -1   1  21   87.59  112.39
   1   0  21  105.39   85.79
   0  -1  21  115.69  106.59
   1   0  21   66.19   93.09
  -1   1 -21  -38.40   68.49
   1   0 -21  136.59   93.69
   0  -1 -21  -24.10  119.89
   0   1  21   -9.10   77.09
   1  -1  21   36.80   74.19
  -1   0  21  163.98  101.09
   1  -1  21   26.90  102.79
   0   1  21  -56.89   78.59
   2  -1 -21  214.68   98.59
  -1   2 -21  145.89  105.59
   1   1  21  236.58  105.89
   1  -2  21  179.68  116.19
  -2   1  21  259.47  105.99
   1   1  21  190.48  103.39
   3  -2 -21  -82.69   72.49
  -1   3 -21 -168.18   97.59
   2   1  21  120.09   88.59
   1  -3  21   88.59  113.79
   2   1  21  -39.90   76.29
  -3   2  21   79.69   87.69
   2  -2 -21  -88.49   73.99
   0   2 -21   62.49  106.09
   2   0  21  -71.59   66.99
   0  -2  21    6.80  105.59
   2   0  21   63.99   91.89
  -2   2  21   65.79   84.69
   1   1 -21   38.30   85.39
  -1   2  21  126.59   86.39
  -1  -1  21  -66.29   91.29
   2  -1  21   11.00   80.29
   2  -1  21   -3.90   86.29
  -1   2  21   44.40   79.99
  -2   2 -21   24.40  105.09
   2   0 -21  120.09   91.99
  -2   0  21   67.39  100.99
   2  -2  21  -50.69   97.29
   0   2  21   77.19   88.49
   2  -2  21  -12.80  100.09
   0   2  21   12.60   85.79
   3  -1 -21   71.09   91.79
  -2   3 -21   52.29  112.19
   1   2  21  -40.50   74.79
   1   2  21  -94.69   61.19
   2  -3  21   78.59  106.99
  -3   1  21   64.99   91.29
   1   2 -21  169.18   97.19
  -2   3  21   47.10   80.59
  -2   3  21   94.69   87.59
   3  -1  21   53.19   88.29
   3  -1  21  -32.10   81.19
  -1  -2  21  -52.69  104.79
   2   1 -21   86.99   87.49
  -1   3  21   63.39   95.29
  -2  -1  21   25.70  102.49
   3  -2  21   43.00   73.39
   3  -2  21  -20.60   78.69
   0   0   0    0.00    0.00

_computing_structure_solution     'SHELXT 2014/5 (Sheldrick, 2014)'

;
_shelx_hkl_checksum                     42649

_shelx_fab_file                         
;
    0    1    0     30.10      0.00
   -1    2    0     12.25      0.00
    0    2    0      8.06      0.00
   -2    3    0      2.01      0.00
   -1    3    0      1.74      0.00
    0    3    0      2.34      0.00
   -3    4    0      1.66      0.00
   -2    4    0      0.05      0.00
   -1    4    0      0.41      0.00
    0    4    0      1.06      0.00
   -4    5    0      0.36      0.00
   -3    5    0      0.30      0.00
   -2    5    0     -1.02      0.00
   -1    5    0     -1.52      0.00
    0    5    0     -0.81      0.00
   -5    6    0      0.09      0.00
   -4    6    0      0.03      0.00
   -3    6    0     -0.38      0.00
   -2    6    0     -1.37      0.00
   -1    6    0     -0.52      0.00
    0    6    0      1.28      0.00
   -6    7    0      1.18      0.00
   -5    7    0      0.16      0.00
   -4    7    0     -0.31      0.00
   -3    7    0     -0.43      0.00
   -2    7    0      0.56      0.00
   -1    7    0      2.07      0.00
    0    7    0      1.72      0.00
   -7    8    0      0.31      0.00
   -6    8    0      0.47      0.00
   -5    8    0     -0.16      0.00
   -4    8    0     -0.81      0.00
   -3    8    0      0.10      0.00
   -2    8    0      1.24      0.00
   -1    8    0      0.81      0.00
    0    8    0      0.10      0.00
   -8    9    0      0.26      0.00
   -7    9    0      0.32      0.00
   -6    9    0      0.97      0.00
   -5    9    0      0.04      0.00
   -4    9    0     -0.35      0.00
   -3    9    0      0.26      0.00
   -2    9    0     -0.31      0.00
   -1    9    0     -0.39      0.00
    0    9    0      1.11      0.00
   -9   10    0      1.59      0.00
   -8   10    0      0.37      0.00
   -7   10    0      0.80      0.00
   -6   10    0      0.97      0.00
   -5   10    0      0.09      0.00
   -4   10    0     -0.13      0.00
   -3   10    0     -0.66      0.00
   -2   10    0     -1.19      0.00
   -1   10    0      0.26      0.00
   -8   11    0      0.11      0.00
   -7   11    0      0.23      0.00
   -6   11    0      0.07      0.00
   -5   11    0     -0.32      0.00
   -4   11    0     -0.65      0.00
   -3   11    0     -1.15      0.00
   -1    1    1    -25.64      0.00
    0    1    1    -25.11      0.00
    1    1    1     -8.96      0.00
   -3    2    1     -0.91      0.00
   -2    2    1     -6.52      0.00
   -1    2    1     -9.39      0.00
    0    2    1     -4.41      0.00
    1    2    1      0.12      0.00
    2    2    1      0.46      0.00
   -5    3    1      1.78      0.00
   -4    3    1      0.05      0.00
   -3    3    1     -1.89      0.00
   -2    3    1     -0.76      0.00
   -1    3    1      0.81      0.00
    0    3    1      0.29      0.00
    1    3    1     -0.31      0.00
    2    3    1      0.40      0.00
    3    3    1      1.10      0.00
   -7    4    1      0.99      0.00
   -6    4    1      2.31      0.00
   -5    4    1      2.53      0.00
   -4    4    1     -0.27      0.00
   -3    4    1     -0.60      0.00
   -2    4    1      1.69      0.00
   -1    4    1      1.53      0.00
    0    4    1      0.46      0.00
    1    4    1      0.72      0.00
    2    4    1      0.65      0.00
    3    4    1      0.64      0.00
    4    4    1      1.11      0.00
   -9    5    1      0.57      0.00
   -8    5    1      0.26      0.00
   -7    5    1     -0.08      0.00
   -6    5    1      1.26      0.00
   -5    5    1      1.58      0.00
   -4    5    1      0.39      0.00
   -3    5    1      0.67      0.00
   -2    5    1      1.93      0.00
   -1    5    1      2.26      0.00
    0    5    1      1.74      0.00
    1    5    1      0.67      0.00
    2    5    1      0.01      0.00
    3    5    1      0.19      0.00
    4    5    1      0.05      0.00
    5    5    1     -0.22      0.00
  -11    6    1      0.19      0.00
  -10    6    1      0.10      0.00
   -9    6    1     -0.12      0.00
   -8    6    1     -0.98      0.00
   -7    6    1     -1.69      0.00
   -6    6    1     -0.79      0.00
   -5    6    1      0.46      0.00
   -4    6    1      0.52      0.00
   -3    6    1      0.78      0.00
   -2    6    1      1.69      0.00
   -1    6    1      1.15      0.00
    0    6    1     -0.50      0.00
    1    6    1     -0.81      0.00
    2    6    1     -0.38      0.00
    3    6    1     -0.76      0.00
    4    6    1     -0.86      0.00
    5    6    1     -0.10      0.00
  -11    7    1      0.39      0.00
  -10    7    1      0.04      0.00
   -9    7    1     -0.14      0.00
   -8    7    1     -0.85      0.00
   -7    7    1     -1.64      0.00
   -6    7    1     -0.85      0.00
   -5    7    1      0.43      0.00
   -4    7    1      0.79      0.00
   -3    7    1      0.83      0.00
   -2    7    1      0.14      0.00
   -1    7    1     -1.28      0.00
    0    7    1     -1.22      0.00
    1    7    1      0.02      0.00
    2    7    1      0.07      0.00
    3    7    1     -0.22      0.00
    4    7    1      0.33      0.00
  -11    8    1      0.25      0.00
  -10    8    1     -0.05      0.00
   -9    8    1     -0.39      0.00
   -8    8    1     -0.54      0.00
   -7    8    1     -0.62      0.00
   -6    8    1     -0.35      0.00
   -5    8    1      0.56      0.00
   -4    8    1      1.14      0.00
   -3    8    1      0.39      0.00
   -2    8    1     -0.52      0.00
   -1    8    1     -0.23      0.00
    0    8    1      0.31      0.00
    1    8    1      0.11      0.00
    2    8    1      0.07      0.00
    3    8    1      0.61      0.00
  -10    9    1     -1.13      0.00
   -9    9    1     -1.66      0.00
   -8    9    1     -0.73      0.00
   -7    9    1     -0.74      0.00
   -6    9    1     -0.95      0.00
   -5    9    1      0.21      0.00
   -4    9    1      0.62      0.00
   -3    9    1      0.27      0.00
   -2    9    1      1.14      0.00
   -1    9    1      1.18      0.00
    0    9    1     -0.63      0.00
    1    9    1     -1.32      0.00
   -9   10    1     -1.74      0.00
   -8   10    1     -0.67      0.00
   -7   10    1     -1.04      0.00
   -6   10    1     -0.77      0.00
   -5   10    1      0.32      0.00
   -4   10    1      0.63      0.00
   -3   10    1      1.61      0.00
   -2   10    1      2.40      0.00
   -1   10    1      0.52      0.00
   -8   11    1     -0.41      0.00
   -7   11    1     -0.35      0.00
   -6   11    1      0.20      0.00
   -5   11    1      0.69      0.00
   -4   11    1      1.25      0.00
   -3   11    1      2.13      0.00
    0    0    2     32.10      0.00
   -1    1    2     21.16      0.00
    0    1    2     20.38      0.00
    1    1    2      7.55      0.00
   -3    2    2      2.15      0.00
   -2    2    2      6.73      0.00
   -1    2    2      8.48      0.00
    0    2    2      3.61      0.00
    1    2    2      0.58      0.00
    2    2    2      1.02      0.00
   -5    3    2     -0.83      0.00
   -4    3    2      1.16      0.00
   -3    3    2      3.28      0.00
   -2    3    2      2.07      0.00
   -1    3    2     -0.17      0.00
    0    3    2      0.13      0.00
    1    3    2      1.14      0.00
    2    3    2      0.36      0.00
    3    3    2     -0.57      0.00
   -7    4    2     -0.42      0.00
   -6    4    2     -1.69      0.00
   -5    4    2     -1.96      0.00
   -4    4    2      0.97      0.00
   -3    4    2      1.57      0.00
   -2    4    2     -0.80      0.00
   -1    4    2     -0.97      0.00
    0    4    2     -0.06      0.00
    1    4    2     -0.55      0.00
    2    4    2     -0.55      0.00
    3    4    2     -0.24      0.00
    4    4    2     -0.77      0.00
   -9    5    2     -0.60      0.00
   -8    5    2     -0.21      0.00
   -7    5    2      0.33      0.00
   -6    5    2     -1.11      0.00
   -5    5    2     -1.38      0.00
   -4    5    2      0.08      0.00
   -3    5    2     -0.05      0.00
   -2    5    2     -1.20      0.00
   -1    5    2     -1.66      0.00
    0    5    2     -1.68      0.00
    1    5    2     -0.84      0.00
    2    5    2      0.23      0.00
    3    5    2      0.22      0.00
    4    5    2      0.18      0.00
    5    5    2      0.57      0.00
  -11    6    2      0.16      0.00
  -10    6    2     -0.08      0.00
   -9    6    2     -0.16      0.00
   -8    6    2      0.71      0.00
   -7    6    2      1.38      0.00
   -6    6    2      0.47      0.00
   -5    6    2     -0.56      0.00
   -4    6    2     -0.37      0.00
   -3    6    2     -0.42      0.00
   -2    6    2     -1.36      0.00
   -1    6    2     -1.30      0.00
    0    6    2      0.12      0.00
    1    6    2      0.89      0.00
    2    6    2      0.68      0.00
    3    6    2      0.73      0.00
    4    6    2      0.87      0.00
    5    6    2      0.54      0.00
  -11    7    2     -0.20      0.00
  -10    7    2      0.23      0.00
   -9    7    2      0.20      0.00
   -8    7    2      0.61      0.00
   -7    7    2      1.33      0.00
   -6    7    2      0.55      0.00
   -5    7    2     -0.71      0.00
   -4    7    2     -0.91      0.00
   -3    7    2     -1.01      0.00
   -2    7    2     -0.77      0.00
   -1    7    2      0.62      0.00
    0    7    2      1.17      0.00
    1    7    2      0.28      0.00
    2    7    2     -0.22      0.00
    3    7    2     -0.42      0.00
    4    7    2     -0.77      0.00
  -11    8    2      0.27      0.00
  -10    8    2      0.72      0.00
   -9    8    2      0.58      0.00
   -8    8    2      0.54      0.00
   -7    8    2      0.75      0.00
   -6    8    2      0.28      0.00
   -5    8    2     -0.72      0.00
   -4    8    2     -1.26      0.00
   -3    8    2     -0.89      0.00
   -2    8    2     -0.11      0.00
   -1    8    2      0.19      0.00
    0    8    2      0.02      0.00
    1    8    2     -0.10      0.00
    2    8    2     -0.66      0.00
    3    8    2     -1.54      0.00
  -10    9    2      1.24      0.00
   -9    9    2      1.39      0.00
   -8    9    2      0.68      0.00
   -7    9    2      0.78      0.00
   -6    9    2      0.77      0.00
   -5    9    2     -0.39      0.00
   -4    9    2     -0.85      0.00
   -3    9    2     -0.67      0.00
   -2    9    2     -1.28      0.00
   -1    9    2     -1.04      0.00
    0    9    2      0.56      0.00
    1    9    2      0.89      0.00
   -9   10    2      1.14      0.00
   -8   10    2      0.28      0.00
   -7   10    2      0.67      0.00
   -6   10    2      0.30      0.00
   -5   10    2     -0.76      0.00
   -4   10    2     -1.01      0.00
   -3   10    2     -1.91      0.00
   -2   10    2     -2.54      0.00
   -1   10    2     -0.65      0.00
   -8   11    2     -0.09      0.00
   -7   11    2     -0.07      0.00
   -6   11    2     -0.63      0.00
   -5   11    2     -1.03      0.00
   -4   11    2     -1.49      0.00
   -3   11    2     -2.29      0.00
    0    0    3    -19.90      0.00
   -1    1    3    -12.46      0.00
    0    1    3    -11.78      0.00
    1    1    3     -2.92      0.00
   -3    2    3     -0.18      0.00
   -2    2    3     -3.20      0.00
   -1    2    3     -4.27      0.00
    0    2    3     -0.45      0.00
    1    2    3      1.05      0.00
    2    2    3     -0.07      0.00
   -5    3    3      1.20      0.00
   -4    3    3      0.03      0.00
   -3    3    3     -1.55      0.00
   -2    3    3     -0.57      0.00
   -1    3    3      1.53      0.00
    0    3    3      1.20      0.00
    1    3    3     -0.06      0.00
    2    3    3      0.44      0.00
    3    3    3      0.81      0.00
   -7    4    3      0.12      0.00
   -6    4    3      1.41      0.00
   -5    4    3      2.36      0.00
   -4    4    3      0.07      0.00
   -3    4    3     -0.63      0.00
   -2    4    3      1.53      0.00
   -1    4    3      1.86      0.00
    0    4    3      1.11      0.00
    1    4    3      1.62      0.00
    2    4    3      1.37      0.00
    3    4    3      0.46      0.00
    4    4    3      0.77      0.00
   -9    5    3      0.89      0.00
   -8    5    3      0.31      0.00
   -7    5    3     -0.45      0.00
   -6    5    3      1.30      0.00
   -5    5    3      1.87      0.00
   -4    5    3      0.42      0.00
   -3    5    3      0.54      0.00
   -2    5    3      1.71      0.00
   -1    5    3      2.24      0.00
    0    5    3      2.52      0.00
    1    5    3      1.75      0.00
    2    5    3      0.26      0.00
    3    5    3      0.00      0.00
    4    5    3      0.05      0.00
    5    5    3     -0.60      0.00
  -11    6    3     -0.32      0.00
  -10    6    3      0.35      0.00
   -9    6    3      0.63      0.00
   -8    6    3     -0.30      0.00
   -7    6    3     -0.80      0.00
   -6    6    3      0.23      0.00
   -5    6    3      1.06      0.00
   -4    6    3      0.80      0.00
   -3    6    3      0.97      0.00
   -2    6    3      2.01      0.00
   -1    6    3      2.22      0.00
    0    6    3      0.84      0.00
    1    6    3     -0.44      0.00
    2    6    3     -0.46      0.00
    3    6    3     -0.19      0.00
    4    6    3     -0.49      0.00
    5    6    3     -0.81      0.00
  -11    7    3      0.35      0.00
  -10    7    3     -0.04      0.00
   -9    7    3      0.08      0.00
   -8    7    3     -0.12      0.00
   -7    7    3     -0.78      0.00
   -6    7    3     -0.16      0.00
   -5    7    3      1.00      0.00
   -4    7    3      1.28      0.00
   -3    7    3      1.69      0.00
   -2    7    3      1.88      0.00
   -1    7    3      0.42      0.00
    0    7    3     -0.87      0.00
    1    7    3     -0.36      0.00
    2    7    3      0.65      0.00
    3    7    3      1.31      0.00
    4    7    3      1.24      0.00
  -10    8    3     -0.75      0.00
   -9    8    3     -0.25      0.00
   -8    8    3     -0.26      0.00
   -7    8    3     -0.84      0.00
   -6    8    3     -0.45      0.00
   -5    8    3      0.59      0.00
   -4    8    3      1.28      0.00
   -3    8    3      1.43      0.00
   -2    8    3      0.69      0.00
   -1    8    3     -0.33      0.00
    0    8    3     -0.46      0.00
    1    8    3      0.25      0.00
    2    8    3      1.49      0.00
  -10    9    3     -0.89      0.00
   -9    9    3     -0.81      0.00
   -8    9    3     -0.61      0.00
   -7    9    3     -1.04      0.00
   -6    9    3     -0.96      0.00
   -5    9    3      0.19      0.00
   -4    9    3      0.86      0.00
   -3    9    3      0.75      0.00
   -2    9    3      0.73      0.00
   -1    9    3      0.28      0.00
    0    9    3     -0.54      0.00
    1    9    3     -0.14      0.00
   -9   10    3     -0.75      0.00
   -8   10    3     -0.24      0.00
   -7   10    3     -0.66      0.00
   -6   10    3     -0.24      0.00
   -5   10    3      0.86      0.00
   -4   10    3      1.10      0.00
   -3   10    3      1.50      0.00
   -2   10    3      1.69      0.00
   -1   10    3      0.33      0.00
   -7   11    3      0.13      0.00
   -6   11    3      0.75      0.00
   -5   11    3      1.18      0.00
   -4   11    3      1.38      0.00
    0    0    4     13.51      0.00
   -1    1    4      8.59      0.00
    0    1    4      8.24      0.00
    1    1    4      2.11      0.00
   -3    2    4      0.25      0.00
   -2    2    4      2.36      0.00
   -1    2    4      3.49      0.00
    0    2    4      0.87      0.00
    1    2    4     -0.17      0.00
    2    2    4      0.61      0.00
   -5    3    4     -0.24      0.00
   -4    3    4      0.13      0.00
   -3    3    4      1.27      0.00
   -2    3    4      0.91      0.00
   -1    3    4     -0.53      0.00
    0    3    4     -0.27      0.00
    1    3    4      0.61      0.00
    2    3    4      0.09      0.00
    3    3    4      0.10      0.00
   -7    4    4      1.01      0.00
   -6    4    4     -0.04      0.00
   -5    4    4     -1.49      0.00
   -4    4    4      0.14      0.00
   -3    4    4      1.00      0.00
   -2    4    4     -0.73      0.00
   -1    4    4     -1.11      0.00
    0    4    4     -0.54      0.00
    1    4    4     -1.16      0.00
    2    4    4     -0.95      0.00
    3    4    4      0.13      0.00
    4    4    4     -0.14      0.00
   -9    5    4     -0.59      0.00
   -8    5    4      0.29      0.00
   -7    5    4      1.25      0.00
   -6    5    4     -0.68      0.00
   -5    5    4     -1.42      0.00
   -4    5    4      0.08      0.00
   -3    5    4     -0.05      0.00
   -2    5    4     -1.24      0.00
   -1    5    4     -1.62      0.00
    0    5    4     -1.92      0.00
    1    5    4     -1.39      0.00
    2    5    4      0.02      0.00
    3    5    4      0.30      0.00
    4    5    4      0.20      0.00
    5    5    4      0.98      0.00
  -11    6    4      0.75      0.00
  -10    6    4     -0.19      0.00
   -9    6    4     -0.54      0.00
   -8    6    4      0.39      0.00
   -7    6    4      0.58      0.00
   -6    6    4     -0.52      0.00
   -5    6    4     -1.00      0.00
   -4    6    4     -0.72      0.00
   -3    6    4     -1.09      0.00
   -2    6    4     -2.01      0.00
   -1    6    4     -2.09      0.00
    0    6    4     -0.80      0.00
    1    6    4      0.59      0.00
    2    6    4      0.67      0.00
    3    6    4      0.19      0.00
    4    6    4      0.63      0.00
    5    6    4      1.39      0.00
  -11    7    4     -0.26      0.00
  -10    7    4     -0.03      0.00
   -9    7    4     -0.35      0.00
   -8    7    4     -0.51      0.00
   -7    7    4      0.02      0.00
   -6    7    4     -0.25      0.00
   -5    7    4     -1.14      0.00
   -4    7    4     -1.47      0.00
   -3    7    4     -1.99      0.00
   -2    7    4     -2.22      0.00
   -1    7    4     -0.67      0.00
    0    7    4      1.01      0.00
    1    7    4      0.74      0.00
    2    7    4     -0.57      0.00
    3    7    4     -1.42      0.00
    4    7    4     -0.99      0.00
  -10    8    4      0.25      0.00
   -9    8    4     -0.85      0.00
   -8    8    4     -0.89      0.00
   -7    8    4      0.21      0.00
   -6    8    4      0.20      0.00
   -5    8    4     -0.58      0.00
   -4    8    4     -1.16      0.00
   -3    8    4     -1.43      0.00
   -2    8    4     -0.53      0.00
   -1    8    4      1.03      0.00
    0    8    4      1.21      0.00
    1    8    4     -0.08      0.00
    2    8    4     -1.75      0.00
  -10    9    4     -0.34      0.00
   -9    9    4     -0.85      0.00
   -8    9    4     -0.48      0.00
   -7    9    4      0.48      0.00
   -6    9    4      0.67      0.00
   -5    9    4     -0.12      0.00
   -4    9    4     -0.68      0.00
   -3    9    4     -0.30      0.00
   -2    9    4      0.55      0.00
   -1    9    4      1.11      0.00
    0    9    4      0.86      0.00
    1    9    4     -0.32      0.00
   -9   10    4     -0.45      0.00
   -8   10    4     -0.50      0.00
   -7   10    4      0.10      0.00
   -6   10    4     -0.10      0.00
   -5   10    4     -1.00      0.00
   -4   10    4     -0.97      0.00
   -3   10    4     -0.48      0.00
   -2   10    4     -0.06      0.00
   -1   10    4      0.53      0.00
   -7   11    4     -0.56      0.00
   -6   11    4     -1.05      0.00
   -5   11    4     -1.32      0.00
   -4   11    4     -0.99      0.00
    0    0    5     -8.75      0.00
   -1    1    5     -5.28      0.00
    0    1    5     -5.25      0.00
    1    1    5     -0.81      0.00
   -3    2    5      0.80      0.00
   -2    2    5     -0.53      0.00
   -1    2    5     -1.78      0.00
    0    2    5     -0.25      0.00
    1    2    5      0.60      0.00
    2    2    5      0.06      0.00
   -5    3    5      0.16      0.00
   -4    3    5      0.59      0.00
   -3    3    5      0.15      0.00
   -2    3    5      0.28      0.00
   -1    3    5      1.08      0.00
    0    3    5      0.73      0.00
    1    3    5      0.00      0.00
    2    3    5      0.20      0.00
    3    3    5     -0.31      0.00
   -7    4    5     -1.36      0.00
   -6    4    5     -0.58      0.00
   -5    4    5      1.17      0.00
   -4    4    5      0.24      0.00
   -3    4    5     -0.41      0.00
   -2    4    5      1.09      0.00
   -1    4    5      1.38      0.00
    0    4    5      0.65      0.00
    1    4    5      1.08      0.00
    2    4    5      0.91      0.00
    3    4    5     -0.13      0.00
    4    4    5      0.07      0.00
   -9    5    5      0.56      0.00
   -8    5    5     -0.61      0.00
   -7    5    5     -1.65      0.00
   -6    5    5      0.30      0.00
   -5    5    5      1.08      0.00
   -4    5    5     -0.28      0.00
   -3    5    5      0.09      0.00
   -2    5    5      1.28      0.00
   -1    5    5      1.23      0.00
    0    5    5      1.27      0.00
    1    5    5      1.15      0.00
    2    5    5      0.22      0.00
    3    5    5      0.04      0.00
    4    5    5      0.10      0.00
    5    5    5     -0.77      0.00
  -11    6    5     -0.80      0.00
  -10    6    5      0.05      0.00
   -9    6    5      0.18      0.00
   -8    6    5     -0.76      0.00
   -7    6    5     -0.68      0.00
   -6    6    5      0.37      0.00
   -5    6    5      0.58      0.00
   -4    6    5      0.53      0.00
   -3    6    5      1.21      0.00
   -2    6    5      1.81      0.00
   -1    6    5      1.62      0.00
    0    6    5      0.75      0.00
    1    6    5     -0.15      0.00
    2    6    5     -0.12      0.00
    3    6    5      0.33      0.00
    4    6    5     -0.27      0.00
    5    6    5     -1.23      0.00
  -11    7    5      0.00      0.00
  -10    7    5     -0.30      0.00
   -9    7    5      0.07      0.00
   -8    7    5      0.49      0.00
   -7    7    5      0.00      0.00
   -6    7    5     -0.08      0.00
   -5    7    5      0.69      0.00
   -4    7    5      1.22      0.00
   -3    7    5      1.70      0.00
   -2    7    5      1.87      0.00
   -1    7    5      0.71      0.00
    0    7    5     -0.55      0.00
    1    7    5     -0.21      0.00
    2    7    5      1.08      0.00
    3    7    5      1.75      0.00
    4    7    5      1.00      0.00
  -10    8    5     -0.25      0.00
   -9    8    5      1.32      0.00
   -8    8    5      1.34      0.00
   -7    8    5     -0.26      0.00
   -6    8    5     -0.60      0.00
   -5    8    5      0.02      0.00
   -4    8    5      0.41      0.00
   -3    8    5      0.70      0.00
   -2    8    5      0.01      0.00
   -1    8    5     -1.29      0.00
    0    8    5     -1.08      0.00
    1    8    5      0.63      0.00
    2    8    5      2.30      0.00
  -10    9    5      0.92      0.00
   -9    9    5      1.71      0.00
   -8    9    5      0.75      0.00
   -7    9    5     -0.69      0.00
   -6    9    5     -1.05      0.00
   -5    9    5     -0.57      0.00
   -4    9    5     -0.07      0.00
   -3    9    5     -0.43      0.00
   -2    9    5     -1.54      0.00
   -1    9    5     -1.83      0.00
    0    9    5     -0.58      0.00
    1    9    5      1.16      0.00
   -9   10    5      0.57      0.00
   -8   10    5      0.09      0.00
   -7   10    5     -0.58      0.00
   -6   10    5     -0.45      0.00
   -5   10    5      0.46      0.00
   -4   10    5      0.57      0.00
   -3   10    5     -0.34      0.00
   -2   10    5     -1.08      0.00
   -1   10    5     -0.90      0.00
   -7   11    5     -0.05      0.00
   -6   11    5      0.52      0.00
   -5   11    5      1.01      0.00
   -4   11    5      0.61      0.00
    0    0    6      7.25      0.00
   -1    1    6      4.39      0.00
    0    1    6      4.55      0.00
    1    1    6      1.05      0.00
   -3    2    6     -0.66      0.00
   -2    2    6      0.08      0.00
   -1    2    6      1.19      0.00
    0    2    6      0.43      0.00
    1    2    6     -0.33      0.00
    2    2    6     -0.03      0.00
   -5    3    6      0.10      0.00
   -4    3    6     -0.47      0.00
   -3    3    6     -0.58      0.00
   -2    3    6     -0.93      0.00
   -1    3    6     -1.36      0.00
    0    3    6     -0.84      0.00
    1    3    6     -0.17      0.00
    2    3    6     -0.12      0.00
    3    3    6      0.47      0.00
   -7    4    6      1.27      0.00
   -6    4    6      0.68      0.00
   -5    4    6     -0.86      0.00
   -4    4    6     -0.26      0.00
   -3    4    6      0.05      0.00
   -2    4    6     -1.35      0.00
   -1    4    6     -1.38      0.00
    0    4    6     -0.34      0.00
    1    4    6     -0.52      0.00
    2    4    6     -0.52      0.00
    3    4    6      0.20      0.00
    4    4    6     -0.03      0.00
   -9    5    6     -0.48      0.00
   -8    5    6      0.62      0.00
   -7    5    6      1.44      0.00
   -6    5    6     -0.37      0.00
   -5    5    6     -0.99      0.00
   -4    5    6      0.20      0.00
   -3    5    6     -0.34      0.00
   -2    5    6     -1.28      0.00
   -1    5    6     -0.55      0.00
    0    5    6     -0.19      0.00
    1    5    6     -0.48      0.00
    2    5    6     -0.13      0.00
    3    5    6     -0.05      0.00
    4    5    6     -0.08      0.00
    5    5    6      0.61      0.00
  -10    6    6      0.12      0.00
   -9    6    6      0.11      0.00
   -8    6    6      0.84      0.00
   -7    6    6      0.49      0.00
   -6    6    6     -0.46      0.00
   -5    6    6     -0.57      0.00
   -4    6    6     -0.77      0.00
   -3    6    6     -1.49      0.00
   -2    6    6     -1.45      0.00
   -1    6    6     -0.81      0.00
    0    6    6     -0.40      0.00
    1    6    6     -0.10      0.00
    2    6    6     -0.08      0.00
    3    6    6     -0.18      0.00
    4    6    6      0.43      0.00
  -10    7    6      0.66      0.00
   -9    7    6      0.09      0.00
   -8    7    6     -0.63      0.00
   -7    7    6     -0.23      0.00
   -6    7    6     -0.03      0.00
   -5    7    6     -0.85      0.00
   -4    7    6     -1.44      0.00
   -3    7    6     -1.47      0.00
   -2    7    6     -1.29      0.00
   -1    7    6     -0.60      0.00
    0    7    6      0.04      0.00
    1    7    6     -0.20      0.00
    2    7    6     -0.95      0.00
    3    7    6     -1.15      0.00
  -10    8    6      0.17      0.00
   -9    8    6     -1.93      0.00
   -8    8    6     -2.06      0.00
   -7    8    6     -0.31      0.00
   -6    8    6      0.07      0.00
   -5    8    6     -0.39      0.00
   -4    8    6     -0.26      0.00
   -3    8    6     -0.18      0.00
   -2    8    6      0.28      0.00
   -1    8    6      1.15      0.00
    0    8    6      0.81      0.00
    1    8    6     -0.70      0.00
    2    8    6     -1.94      0.00
   -9    9    6     -2.83      0.00
   -8    9    6     -1.57      0.00
   -7    9    6     -0.02      0.00
   -6    9    6      0.36      0.00
   -5    9    6      0.34      0.00
   -4    9    6      0.19      0.00
   -3    9    6      0.51      0.00
   -2    9    6      1.71      0.00
   -1    9    6      2.05      0.00
    0    9    6      0.58      0.00
   -8   10    6     -0.38      0.00
   -7   10    6      0.22      0.00
   -6   10    6      0.22      0.00
   -5   10    6     -0.52      0.00
   -4   10    6     -0.81      0.00
   -3   10    6      0.27      0.00
   -2   10    6      1.45      0.00
    0    0    7     -5.28      0.00
   -1    1    7     -2.92      0.00
    0    1    7     -3.12      0.00
    1    1    7     -0.65      0.00
   -3    2    7      0.43      0.00
   -2    2    7      0.57      0.00
   -1    2    7      0.03      0.00
    0    2    7      0.16      0.00
    1    2    7      0.43      0.00
    2    2    7     -0.03      0.00
   -5    3    7     -0.17      0.00
   -4    3    7      0.02      0.00
   -3    3    7      0.60      0.00
   -2    3    7      1.58      0.00
   -1    3    7      1.88      0.00
    0    3    7      1.11      0.00
    1    3    7      0.41      0.00
    2    3    7      0.21      0.00
    3    3    7     -0.23      0.00
   -7    4    7     -0.64      0.00
   -6    4    7     -0.33      0.00
   -5    4    7      0.57      0.00
   -4    4    7      0.01      0.00
   -3    4    7      0.10      0.00
   -2    4    7      1.42      0.00
   -1    4    7      1.16      0.00
    0    4    7     -0.03      0.00
    1    4    7      0.11      0.00
    2    4    7      0.40      0.00
    3    4    7      0.11      0.00
    4    4    7      0.42      0.00
   -9    5    7      0.78      0.00
   -8    5    7     -0.22      0.00
   -7    5    7     -0.95      0.00
   -6    5    7      0.41      0.00
   -5    5    7      0.72      0.00
   -4    5    7     -0.28      0.00
   -3    5    7      0.30      0.00
   -2    5    7      0.90      0.00
   -1    5    7     -0.27      0.00
    0    5    7     -0.75      0.00
    1    5    7      0.06      0.00
    2    5    7      0.35      0.00
    3    5    7      0.37      0.00
    4    5    7      0.40      0.00
    5    5    7      0.00      0.00
  -10    6    7      0.04      0.00
   -9    6    7     -0.19      0.00
   -8    6    7     -0.95      0.00
   -7    6    7     -0.76      0.00
   -6    6    7     -0.08      0.00
   -5    6    7      0.08      0.00
   -4    6    7      0.51      0.00
   -3    6    7      1.14      0.00
   -2    6    7      0.68      0.00
   -1    6    7     -0.07      0.00
    0    6    7      0.17      0.00
    1    6    7      0.60      0.00
    2    6    7      0.58      0.00
    3    6    7      0.33      0.00
    4    6    7     -0.21      0.00
  -10    7    7     -1.08      0.00
   -9    7    7     -0.60      0.00
   -8    7    7     -0.06      0.00
   -7    7    7     -0.61      0.00
   -6    7    7     -0.76      0.00
   -5    7    7      0.32      0.00
   -4    7    7      0.93      0.00
   -3    7    7      0.63      0.00
   -2    7    7      0.43      0.00
   -1    7    7      0.52      0.00
    0    7    7      0.68      0.00
    1    7    7      0.92      0.00
    2    7    7      1.10      0.00
    3    7    7      0.88      0.00
  -10    8    7     -0.74      0.00
   -9    8    7      1.32      0.00
   -8    8    7      1.30      0.00
   -7    8    7     -0.38      0.00
   -6    8    7     -0.40      0.00
   -5    8    7      0.14      0.00
   -4    8    7     -0.36      0.00
   -3    8    7     -0.54      0.00
   -2    8    7     -0.35      0.00
   -1    8    7     -0.49      0.00
    0    8    7     -0.08      0.00
    1    8    7      1.03      0.00
    2    8    7      1.82      0.00
   -9    9    7      2.27      0.00
   -8    9    7      0.85      0.00
   -7    9    7     -0.40      0.00
   -6    9    7     -0.43      0.00
   -5    9    7     -0.59      0.00
   -4    9    7     -0.51      0.00
   -3    9    7     -0.32      0.00
   -2    9    7     -1.05      0.00
   -1    9    7     -1.41      0.00
    0    9    7     -0.21      0.00
   -8   10    7     -0.49      0.00
   -7   10    7     -0.76      0.00
   -6   10    7     -0.67      0.00
   -5   10    7      0.12      0.00
   -4   10    7      1.00      0.00
   -3   10    7      0.38      0.00
   -2   10    7     -0.89      0.00
    0    0    8      2.53      0.00
   -1    1    8      0.75      0.00
    0    1    8      0.94      0.00
    1    1    8     -0.38      0.00
   -3    2    8     -0.42      0.00
   -2    2    8     -1.48      0.00
   -1    2    8     -1.61      0.00
    0    2    8     -1.20      0.00
    1    2    8     -0.77      0.00
    2    2    8      0.01      0.00
   -5    3    8      0.07      0.00
   -4    3    8      0.33      0.00
   -3    3    8     -0.61      0.00
   -2    3    8     -2.20      0.00
   -1    3    8     -2.37      0.00
    0    3    8     -1.32      0.00
    1    3    8     -0.66      0.00
    2    3    8     -0.43      0.00
    3    3    8     -0.13      0.00
   -7    4    8      0.05      0.00
   -6    4    8     -0.19      0.00
   -5    4    8     -0.59      0.00
   -4    4    8     -0.06      0.00
   -3    4    8     -0.44      0.00
   -2    4    8     -1.53      0.00
   -1    4    8     -0.96      0.00
    0    4    8      0.19      0.00
    1    4    8      0.00      0.00
    2    4    8     -0.37      0.00
    3    4    8     -0.27      0.00
    4    4    8     -0.58      0.00
   -9    5    8     -0.96      0.00
   -8    5    8     -0.25      0.00
   -7    5    8      0.30      0.00
   -6    5    8     -0.73      0.00
   -5    5    8     -0.98      0.00
   -4    5    8     -0.23      0.00
   -3    5    8     -0.65      0.00
   -2    5    8     -0.86      0.00
   -1    5    8      0.50      0.00
    0    5    8      1.05      0.00
    1    5    8      0.17      0.00
    2    5    8     -0.29      0.00
    3    5    8     -0.20      0.00
    4    5    8     -0.18      0.00
    5    5    8     -0.24      0.00
  -10    6    8     -0.41      0.00
   -9    6    8     -0.14      0.00
   -8    6    8      0.62      0.00
   -7    6    8      0.68      0.00
   -6    6    8      0.08      0.00
   -5    6    8     -0.34      0.00
   -4    6    8     -0.86      0.00
   -3    6    8     -1.26      0.00
   -2    6    8     -0.60      0.00
   -1    6    8      0.23      0.00
    0    6    8     -0.09      0.00
    1    6    8     -0.62      0.00
    2    6    8     -0.35      0.00
    3    6    8      0.32      0.00
    4    6    8      0.68      0.00
  -10    7    8      0.84      0.00
   -9    7    8      0.46      0.00
   -8    7    8      0.25      0.00
   -7    7    8      0.90      0.00
   -6    7    8      0.72      0.00
   -5    7    8     -0.62      0.00
   -4    7    8     -1.12      0.00
   -3    7    8     -0.57      0.00
   -2    7    8     -0.34      0.00
   -1    7    8     -0.64      0.00
    0    7    8     -0.88      0.00
    1    7    8     -0.74      0.00
    2    7    8     -0.31      0.00
    3    7    8      0.20      0.00
  -10    8    8      0.68      0.00
   -9    8    8     -1.10      0.00
   -8    8    8     -0.90      0.00
   -7    8    8      0.40      0.00
   -6    8    8     -0.14      0.00
   -5    8    8     -0.80      0.00
   -4    8    8      0.03      0.00
   -3    8    8      0.35      0.00
   -2    8    8     -0.10      0.00
   -1    8    8     -0.08      0.00
    0    8    8      0.01      0.00
    1    8    8     -0.39      0.00
    2    8    8     -0.76      0.00
   -9    9    8     -1.95      0.00
   -8    9    8     -0.65      0.00
   -7    9    8      0.02      0.00
   -6    9    8     -0.40      0.00
   -5    9    8     -0.12      0.00
   -4    9    8     -0.01      0.00
   -3    9    8     -0.46      0.00
   -2    9    8      0.09      0.00
   -1    9    8      0.90      0.00
    0    9    8      0.50      0.00
   -8   10    8      0.38      0.00
   -7   10    8      0.26      0.00
   -6   10    8      0.13      0.00
   -5   10    8     -0.52      0.00
   -4   10    8     -1.62      0.00
   -3   10    8     -1.26      0.00
   -2   10    8      0.23      0.00
    0    0    9     -0.90      0.00
   -1    1    9      0.40      0.00
    0    1    9      0.24      0.00
    1    1    9      0.71      0.00
   -3    2    9     -0.15      0.00
   -2    2    9      1.46      0.00
   -1    2    9      1.99      0.00
    0    2    9      1.25      0.00
    1    2    9      0.38      0.00
    2    2    9     -0.51      0.00
   -5    3    9     -0.52      0.00
   -4    3    9     -1.17      0.00
   -3    3    9     -0.19      0.00
   -2    3    9      1.62      0.00
   -1    3    9      1.60      0.00
    0    3    9      0.49      0.00
    1    3    9      0.12      0.00
    2    3    9      0.12      0.00
    3    3    9     -0.04      0.00
   -7    4    9     -0.18      0.00
   -6    4    9     -0.10      0.00
   -5    4    9     -0.06      0.00
   -4    4    9     -0.63      0.00
   -3    4    9     -0.25      0.00
   -2    4    9      0.51      0.00
   -1    4    9     -0.18      0.00
    0    4    9     -0.94      0.00
    1    4    9     -0.42      0.00
    2    4    9      0.08      0.00
    3    4    9      0.09      0.00
    4    4    9      0.34      0.00
   -9    5    9      0.85      0.00
   -8    5    9      0.11      0.00
   -7    5    9     -0.60      0.00
   -6    5    9      0.06      0.00
   -5    5    9      0.34      0.00
   -4    5    9     -0.25      0.00
   -3    5    9     -0.09      0.00
   -2    5    9     -0.03      0.00
   -1    5    9     -1.05      0.00
    0    5    9     -1.37      0.00
    1    5    9     -0.46      0.00
    2    5    9      0.09      0.00
    3    5    9     -0.09      0.00
    4    5    9     -0.16      0.00
    5    5    9      0.28      0.00
  -10    6    9      0.68      0.00
   -9    6    9      0.22      0.00
   -8    6    9     -0.89      0.00
   -7    6    9     -1.46      0.00
   -6    6    9     -0.95      0.00
   -5    6    9     -0.29      0.00
   -4    6    9      0.14      0.00
   -3    6    9      0.45      0.00
   -2    6    9      0.13      0.00
   -1    6    9     -0.44      0.00
    0    6    9     -0.18      0.00
    1    6    9      0.36      0.00
    2    6    9      0.06      0.00
    3    6    9     -0.81      0.00
    4    6    9     -1.01      0.00
  -10    7    9     -0.61      0.00
   -9    7    9     -0.63      0.00
   -8    7    9     -1.07      0.00
   -7    7    9     -1.93      0.00
   -6    7    9     -1.46      0.00
   -5    7    9     -0.02      0.00
   -4    7    9      0.38      0.00
   -3    7    9      0.03      0.00
   -2    7    9      0.11      0.00
   -1    7    9      0.47      0.00
    0    7    9      0.65      0.00
    1    7    9      0.42      0.00
    2    7    9     -0.21      0.00
    3    7    9     -0.78      0.00
   -9    8    9      0.15      0.00
   -8    8    9     -0.39      0.00
   -7    8    9     -1.37      0.00
   -6    8    9     -0.40      0.00
   -5    8    9      0.41      0.00
   -4    8    9     -0.35      0.00
   -3    8    9     -0.47      0.00
   -2    8    9      0.25      0.00
   -1    8    9      0.31      0.00
    0    8    9     -0.01      0.00
    1    8    9      0.05      0.00
   -9    9    9      0.64      0.00
   -8    9    9     -0.55      0.00
   -7    9    9     -0.77      0.00
   -6    9    9      0.06      0.00
   -5    9    9     -0.07      0.00
   -4    9    9     -0.12      0.00
   -3    9    9      0.61      0.00
   -2    9    9      0.45      0.00
   -1    9    9     -0.39      0.00
    0    9    9     -0.43      0.00
   -7   10    9     -0.62      0.00
   -6   10    9     -0.33      0.00
   -5   10    9      0.25      0.00
   -4   10    9      1.42      0.00
   -3   10    9      1.41      0.00
    0    0   10      0.00      0.00
   -1    1   10     -1.15      0.00
    0    1   10     -1.03      0.00
    1    1   10     -1.27      0.00
   -3    2   10     -0.06      0.00
   -2    2   10     -1.72      0.00
   -1    2   10     -2.28      0.00
    0    2   10     -1.52      0.00
    1    2   10     -0.53      0.00
    2    2   10      0.41      0.00
   -5    3   10      0.58      0.00
   -4    3   10      1.13      0.00
   -3    3   10      0.25      0.00
   -2    3   10     -1.41      0.00
   -1    3   10     -1.25      0.00
    0    3   10     -0.16      0.00
    1    3   10      0.04      0.00
    2    3   10     -0.01      0.00
    3    3   10      0.31      0.00
   -7    4   10      0.73      0.00
   -6    4   10      0.51      0.00
   -5    4   10      0.27      0.00
   -4    4   10      0.70      0.00
   -3    4   10      0.42      0.00
   -2    4   10     -0.09      0.00
   -1    4   10      0.59      0.00
    0    4   10      1.08      0.00
    1    4   10      0.51      0.00
    2    4   10      0.16      0.00
    3    4   10      0.36      0.00
    4    4   10      0.35      0.00
   -9    5   10     -0.30      0.00
   -8    5   10      0.41      0.00
   -7    5   10      1.23      0.00
   -6    5   10      0.57      0.00
   -5    5   10     -0.04      0.00
   -4    5   10      0.38      0.00
   -3    5   10      0.38      0.00
   -2    5   10      0.23      0.00
   -1    5   10      0.89      0.00
    0    5   10      1.20      0.00
    1    5   10      0.61      0.00
    2    5   10      0.28      0.00
    3    5   10      0.73      0.00
    4    5   10      1.01      0.00
    5    5   10      0.18      0.00
  -10    6   10     -0.77      0.00
   -9    6   10     -0.27      0.00
   -8    6   10      1.09      0.00
   -7    6   10      1.98      0.00
   -6    6   10      1.35      0.00
   -5    6   10      0.45      0.00
   -4    6   10      0.14      0.00
   -3    6   10     -0.22      0.00
   -2    6   10     -0.31      0.00
   -1    6   10      0.23      0.00
    0    6   10      0.45      0.00
    1    6   10      0.20      0.00
    2    6   10      0.63      0.00
    3    6   10      1.73      0.00
    4    6   10      1.82      0.00
   -9    7   10      0.34      0.00
   -8    7   10      1.22      0.00
   -7    7   10      2.14      0.00
   -6    7   10      1.48      0.00
   -5    7   10      0.12      0.00
   -4    7   10     -0.22      0.00
   -3    7   10     -0.19      0.00
   -2    7   10     -0.33      0.00
   -1    7   10     -0.24      0.00
    0    7   10      0.01      0.00
    1    7   10      0.38      0.00
    2    7   10      1.14      0.00
   -9    8   10      0.05      0.00
   -8    8   10      0.75      0.00
   -7    8   10      1.53      0.00
   -6    8   10      0.48      0.00
   -5    8   10     -0.35      0.00
   -4    8   10      0.19      0.00
   -3    8   10      0.22      0.00
   -2    8   10     -0.29      0.00
   -1    8   10     -0.11      0.00
    0    8   10      0.44      0.00
    1    8   10      0.66      0.00
   -8    9   10      0.82      0.00
   -7    9   10      0.94      0.00
   -6    9   10      0.02      0.00
   -5    9   10      0.02      0.00
   -4    9   10      0.14      0.00
   -3    9   10     -0.45      0.00
   -2    9   10     -0.41      0.00
   -1    9   10      0.34      0.00
   -6   10   10      0.04      0.00
   -5   10   10     -0.27      0.00
   -4   10   10     -0.98      0.00
    0    0   11     -1.27      0.00
   -1    1   11      0.08      0.00
    0    1   11      0.06      0.00
    1    1   11      0.74      0.00
   -3    2   11     -0.14      0.00
   -2    2   11      0.96      0.00
   -1    2   11      1.34      0.00
    0    2   11      0.93      0.00
    1    2   11      0.22      0.00
    2    2   11     -0.50      0.00
   -5    3   11     -0.69      0.00
   -4    3   11     -1.05      0.00
   -3    3   11     -0.60      0.00
   -2    3   11      0.63      0.00
   -1    3   11      0.54      0.00
    0    3   11     -0.35      0.00
    1    3   11     -0.47      0.00
    2    3   11     -0.33      0.00
    3    3   11     -0.75      0.00
   -7    4   11     -1.42      0.00
   -6    4   11     -1.10      0.00
   -5    4   11     -0.50      0.00
   -4    4   11     -0.93      0.00
   -3    4   11     -0.95      0.00
   -2    4   11     -0.51      0.00
   -1    4   11     -1.00      0.00
    0    4   11     -1.32      0.00
    1    4   11     -0.71      0.00
    2    4   11     -0.36      0.00
    3    4   11     -0.71      0.00
    4    4   11     -1.00      0.00
   -9    5   11     -0.32      0.00
   -8    5   11     -1.09      0.00
   -7    5   11     -2.09      0.00
   -6    5   11     -1.40      0.00
   -5    5   11     -0.59      0.00
   -4    5   11     -0.99      0.00
   -3    5   11     -0.99      0.00
   -2    5   11     -0.60      0.00
   -1    5   11     -0.95      0.00
    0    5   11     -1.16      0.00
    1    5   11     -0.59      0.00
    2    5   11     -0.25      0.00
    3    5   11     -0.94      0.00
    4    5   11     -1.58      0.00
   -9    6   11      0.09      0.00
   -8    6   11     -1.44      0.00
   -7    6   11     -2.59      0.00
   -6    6   11     -1.98      0.00
   -5    6   11     -1.06      0.00
   -4    6   11     -0.80      0.00
   -3    6   11     -0.22      0.00
   -2    6   11      0.22      0.00
   -1    6   11     -0.30      0.00
    0    6   11     -0.66      0.00
    1    6   11     -0.32      0.00
    2    6   11     -0.68      0.00
    3    6   11     -1.99      0.00
   -9    7   11     -0.30      0.00
   -8    7   11     -1.40      0.00
   -7    7   11     -2.43      0.00
   -6    7   11     -1.87      0.00
   -5    7   11     -0.72      0.00
   -4    7   11     -0.26      0.00
   -3    7   11      0.12      0.00
   -2    7   11      0.33      0.00
   -1    7   11     -0.03      0.00
    0    7   11     -0.28      0.00
    1    7   11     -0.45      0.00
    2    7   11     -1.17      0.00
   -9    8   11     -0.41      0.00
   -8    8   11     -1.13      0.00
   -7    8   11     -1.98      0.00
   -6    8   11     -1.26      0.00
   -5    8   11     -0.47      0.00
   -4    8   11     -0.58      0.00
   -3    8   11     -0.35      0.00
   -2    8   11      0.15      0.00
   -1    8   11      0.11      0.00
    0    8   11     -0.21      0.00
    1    8   11     -0.42      0.00
   -8    9   11     -1.25      0.00
   -7    9   11     -1.67      0.00
   -6    9   11     -0.99      0.00
   -5    9   11     -0.80      0.00
   -4    9   11     -0.82      0.00
   -3    9   11     -0.22      0.00
   -2    9   11      0.21      0.00
   -1    9   11      0.06      0.00
    0    0   12      2.15      0.00
   -1    1   12      0.63      0.00
    0    1   12      0.52      0.00
    1    1   12     -0.58      0.00
   -3    2   12     -0.16      0.00
   -2    2   12     -0.65      0.00
   -1    2   12     -0.92      0.00
    0    2   12     -0.94      0.00
    1    2   12     -0.38      0.00
    2    2   12      0.25      0.00
   -5    3   12      0.41      0.00
   -4    3   12      0.31      0.00
   -3    3   12      0.28      0.00
   -2    3   12     -0.56      0.00
   -1    3   12     -0.72      0.00
    0    3   12      0.09      0.00
    1    3   12      0.51      0.00
    2    3   12      0.51      0.00
    3    3   12      1.09      0.00
   -7    4   12      1.92      0.00
   -6    4   12      1.33      0.00
   -5    4   12      0.14      0.00
   -4    4   12      0.52      0.00
   -3    4   12      0.81      0.00
   -2    4   12      0.26      0.00
   -1    4   12      0.61      0.00
    0    4   12      1.12      0.00
    1    4   12      0.71      0.00
    2    4   12      0.40      0.00
    3    4   12      0.91      0.00
    4    4   12      1.44      0.00
   -9    5   12      0.78      0.00
   -8    5   12      1.43      0.00
   -7    5   12      2.46      0.00
   -6    5   12      1.61      0.00
   -5    5   12      0.69      0.00
   -4    5   12      1.10      0.00
   -3    5   12      0.91      0.00
   -2    5   12      0.34      0.00
   -1    5   12      0.77      0.00
    0    5   12      1.07      0.00
    1    5   12      0.42      0.00
    2    5   12      0.04      0.00
    3    5   12      1.00      0.00
    4    5   12      2.02      0.00
   -9    6   12     -0.18      0.00
   -8    6   12      1.23      0.00
   -7    6   12      2.47      0.00
   -6    6   12      2.04      0.00
   -5    6   12      1.27      0.00
   -4    6   12      0.87      0.00
   -3    6   12      0.00      0.00
   -2    6   12     -0.37      0.00
   -1    6   12      0.41      0.00
    0    6   12      0.80      0.00
    1    6   12      0.29      0.00
    2    6   12      0.64      0.00
    3    6   12      2.20      0.00
   -9    7   12     -0.16      0.00
   -8    7   12      0.87      0.00
   -7    7   12      2.06      0.00
   -6    7   12      1.89      0.00
   -5    7   12      0.96      0.00
   -4    7   12      0.22      0.00
   -3    7   12     -0.42      0.00
   -2    7   12     -0.42      0.00
   -1    7   12      0.20      0.00
    0    7   12      0.43      0.00
    1    7   12      0.51      0.00
    2    7   12      1.30      0.00
   -8    8   12      0.73      0.00
   -7    8   12      1.89      0.00
   -6    8   12      1.74      0.00
   -5    8   12      1.05      0.00
   -4    8   12      0.77      0.00
   -3    8   12      0.34      0.00
   -2    8   12     -0.12      0.00
   -1    8   12     -0.17      0.00
    0    8   12      0.08      0.00
   -7    9   12      1.85      0.00
   -6    9   12      1.63      0.00
   -5    9   12      1.42      0.00
   -4    9   12      1.37      0.00
   -3    9   12      0.71      0.00
   -2    9   12     -0.09      0.00
    0    0   13     -2.27      0.00
   -1    1   13     -0.88      0.00
    0    1   13     -0.67      0.00
    1    1   13      0.53      0.00
   -3    2   13      0.48      0.00
   -2    2   13      0.50      0.00
   -1    2   13      0.75      0.00
    0    2   13      1.08      0.00
    1    2   13      0.54      0.00
    2    2   13      0.07      0.00
   -5    3   13      0.14      0.00
   -4    3   13      0.66      0.00
   -3    3   13      0.26      0.00
   -2    3   13      0.69      0.00
   -1    3   13      1.09      0.00
    0    3   13      0.33      0.00
    1    3   13     -0.38      0.00
    2    3   13     -0.42      0.00
    3    3   13     -1.04      0.00
   -7    4   13     -1.88      0.00
   -6    4   13     -1.06      0.00
   -5    4   13      0.71      0.00
   -4    4   13      0.28      0.00
   -3    4   13     -0.36      0.00
   -2    4   13      0.25      0.00
   -1    4   13     -0.02      0.00
    0    4   13     -0.77      0.00
    1    4   13     -0.41      0.00
    2    4   13      0.02      0.00
    3    4   13     -0.53      0.00
    4    4   13     -1.18      0.00
   -9    5   13     -0.65      0.00
   -8    5   13     -1.14      0.00
   -7    5   13     -2.11      0.00
   -6    5   13     -1.11      0.00
   -5    5   13     -0.26      0.00
   -4    5   13     -0.82      0.00
   -3    5   13     -0.44      0.00
   -2    5   13      0.17      0.00
   -1    5   13     -0.55      0.00
    0    5   13     -0.82      0.00
    1    5   13      0.22      0.00
    2    5   13      0.80      0.00
    3    5   13     -0.30      0.00
    4    5   13     -1.70      0.00
   -9    6   13      0.58      0.00
   -8    6   13     -0.45      0.00
   -7    6   13     -1.68      0.00
   -6    6   13     -1.63      0.00
   -5    6   13     -1.21      0.00
   -4    6   13     -0.57      0.00
   -3    6   13      0.59      0.00
   -2    6   13      0.67      0.00
   -1    6   13     -0.37      0.00
    0    6   13     -0.46      0.00
    1    6   13      0.40      0.00
    2    6   13      0.13      0.00
    3    6   13     -1.58      0.00
   -8    7   13     -0.02      0.00
   -7    7   13     -1.45      0.00
   -6    7   13     -1.88      0.00
   -5    7   13     -1.13      0.00
   -4    7   13      0.03      0.00
   -3    7   13      0.88      0.00
   -2    7   13      0.72      0.00
   -1    7   13      0.12      0.00
    0    7   13      0.09      0.00
    1    7   13      0.05      0.00
   -7    8   13     -1.78      0.00
   -6    8   13     -2.23      0.00
   -5    8   13     -1.60      0.00
   -4    8   13     -0.92      0.00
   -3    8   13     -0.16      0.00
   -2    8   13      0.54      0.00
   -1    8   13      0.81      0.00
   -6    9   13     -2.19      0.00
   -5    9   13     -2.01      0.00
   -4    9   13     -1.73      0.00
   -3    9   13     -0.70      0.00
    0    0   14      1.63      0.00
   -1    1   14      0.72      0.00
    0    1   14      0.51      0.00
    1    1   14     -0.27      0.00
   -3    2   14     -0.39      0.00
   -2    2   14     -0.27      0.00
   -1    2   14     -0.54      0.00
    0    2   14     -0.85      0.00
    1    2   14     -0.15      0.00
    2    2   14      0.19      0.00
   -5    3   14     -0.04      0.00
   -4    3   14     -1.08      0.00
   -3    3   14     -0.46      0.00
   -2    3   14     -0.52      0.00
   -1    3   14     -0.99      0.00
    0    3   14     -0.18      0.00
    1    3   14      0.75      0.00
    2    3   14      0.83      0.00
    3    3   14      1.52      0.00
   -7    4   14      2.27      0.00
   -6    4   14      1.26      0.00
   -5    4   14     -1.09      0.00
   -4    4   14     -0.70      0.00
   -3    4   14      0.28      0.00
   -2    4   14     -0.28      0.00
   -1    4   14      0.01      0.00
    0    4   14      0.95      0.00
    1    4   14      0.61      0.00
    2    4   14      0.10      0.00
    3    4   14      0.63      0.00
    4    4   14      1.07      0.00
   -8    5   14      0.96      0.00
   -7    5   14      1.89      0.00
   -6    5   14      0.71      0.00
   -5    5   14      0.01      0.00
   -4    5   14      0.79      0.00
   -3    5   14      0.28      0.00
   -2    5   14     -0.28      0.00
   -1    5   14      0.80      0.00
    0    5   14      1.07      0.00
    1    5   14     -0.27      0.00
    2    5   14     -1.03      0.00
    3    5   14     -0.06      0.00
   -8    6   14     -0.30      0.00
   -7    6   14      0.86      0.00
   -6    6   14      1.26      0.00
   -5    6   14      1.35      0.00
   -4    6   14      0.50      0.00
   -3    6   14     -0.94      0.00
   -2    6   14     -0.66      0.00
   -1    6   14      0.68      0.00
    0    6   14      0.59      0.00
    1    6   14     -0.47      0.00
    2    6   14     -0.34      0.00
   -8    7   14     -0.78      0.00
   -7    7   14      0.94      0.00
   -6    7   14      2.07      0.00
   -5    7   14      1.51      0.00
   -4    7   14     -0.08      0.00
   -3    7   14     -1.08      0.00
   -2    7   14     -0.73      0.00
   -1    7   14     -0.11      0.00
    0    7   14     -0.05      0.00
    1    7   14      0.12      0.00
   -7    8   14      1.73      0.00
   -6    8   14      2.66      0.00
   -5    8   14      2.07      0.00
   -4    8   14      1.09      0.00
   -3    8   14      0.09      0.00
   -2    8   14     -0.75      0.00
   -1    8   14     -0.96      0.00
    0    0   15     -0.44      0.00
   -1    1   15     -0.02      0.00
    0    1   15      0.12      0.00
    1    1   15      0.45      0.00
   -3    2   15      0.77      0.00
   -2    2   15      0.58      0.00
   -1    2   15      0.78      0.00
    0    2   15      0.94      0.00
    1    2   15      0.23      0.00
    2    2   15      0.17      0.00
   -5    3   15      0.34      0.00
   -4    3   15      1.83      0.00
   -3    3   15      1.09      0.00
   -2    3   15      0.75      0.00
   -1    3   15      1.13      0.00
    0    3   15      0.38      0.00
    1    3   15     -0.47      0.00
    2    3   15     -0.55      0.00
    3    3   15     -1.48      0.00
   -7    4   15     -2.32      0.00
   -6    4   15     -1.10      0.00
   -5    4   15      1.80      0.00
   -4    4   15      1.50      0.00
   -3    4   15      0.17      0.00
   -2    4   15      0.54      0.00
   -1    4   15      0.28      0.00
    0    4   15     -0.64      0.00
    1    4   15     -0.25      0.00
    2    4   15      0.19      0.00
    3    4   15     -0.43      0.00
    4    4   15     -0.68      0.00
   -8    5   15     -0.63      0.00
   -7    5   15     -1.35      0.00
   -6    5   15      0.17      0.00
   -5    5   15      0.79      0.00
   -4    5   15     -0.30      0.00
   -3    5   15      0.16      0.00
   -2    5   15      0.67      0.00
   -1    5   15     -0.57      0.00
    0    5   15     -0.83      0.00
    1    5   15      0.62      0.00
    2    5   15      1.43      0.00
    3    5   15      0.69      0.00
   -8    6   15      1.00      0.00
   -7    6   15      0.23      0.00
   -6    6   15     -0.37      0.00
   -5    6   15     -0.99      0.00
   -4    6   15     -0.14      0.00
   -3    6   15      1.50      0.00
   -2    6   15      1.00      0.00
   -1    6   15     -0.51      0.00
    0    6   15     -0.36      0.00
    1    6   15      0.72      0.00
    2    6   15      0.76      0.00
   -7    7   15     -0.27      0.00
   -6    7   15     -1.89      0.00
   -5    7   15     -1.55      0.00
   -4    7   15      0.34      0.00
   -3    7   15      1.44      0.00
   -2    7   15      0.96      0.00
   -1    7   15      0.33      0.00
    0    7   15      0.18      0.00
   -6    8   15     -2.67      0.00
   -5    8   15     -2.05      0.00
   -4    8   15     -0.90      0.00
   -3    8   15      0.18      0.00
   -2    8   15      1.05      0.00
    0    0   16      0.81      0.00
   -1    1   16      0.59      0.00
    0    1   16      0.53      0.00
    1    1   16      0.37      0.00
   -3    2   16     -0.28      0.00
   -2    2   16      0.04      0.00
   -1    2   16     -0.04      0.00
    0    2   16     -0.11      0.00
    1    2   16      0.39      0.00
    2    2   16      0.16      0.00
   -5    3   16      0.24      0.00
   -4    3   16     -1.46      0.00
   -3    3   16     -0.66      0.00
   -2    3   16     -0.07      0.00
   -1    3   16     -0.38      0.00
    0    3   16      0.15      0.00
    1    3   16      0.77      0.00
    2    3   16      0.90      0.00
    3    3   16      2.17      0.00
   -7    4   16      3.12      0.00
   -6    4   16      1.78      0.00
   -5    4   16     -1.40      0.00
   -4    4   16     -1.15      0.00
   -3    4   16      0.40      0.00
   -2    4   16      0.15      0.00
   -1    4   16      0.26      0.00
    0    4   16      1.00      0.00
    1    4   16      0.62      0.00
    2    4   16      0.40      0.00
    3    4   16      1.14      0.00
   -7    5   16      1.70      0.00
   -6    5   16     -0.17      0.00
   -5    5   16     -0.73      0.00
   -4    5   16      0.67      0.00
   -3    5   16      0.35      0.00
   -2    5   16     -0.21      0.00
   -1    5   16      1.00      0.00
    0    5   16      1.29      0.00
    1    5   16     -0.02      0.00
    2    5   16     -0.77      0.00
   -7    6   16     -0.42      0.00
   -6    6   16      0.10      0.00
   -5    6   16      1.14      0.00
   -4    6   16      0.50      0.00
   -3    6   16     -1.19      0.00
   -2    6   16     -0.62      0.00
   -1    6   16      0.99      0.00
    0    6   16      0.91      0.00
    1    6   16     -0.05      0.00
   -6    7   16      1.99      0.00
   -5    7   16      1.87      0.00
   -4    7   16     -0.07      0.00
   -3    7   16     -1.12      0.00
   -2    7   16     -0.47      0.00
   -1    7   16      0.24      0.00
    0    0   17     -1.06      0.00
   -1    1   17     -0.68      0.00
    0    1   17     -0.61      0.00
    1    1   17     -0.21      0.00
   -3    2   17      0.76      0.00
   -2    2   17      0.18      0.00
   -1    2   17      0.22      0.00
    0    2   17      0.44      0.00
    1    2   17      0.36      0.00
    2    2   17      0.79      0.00
   -5    3   17      0.35      0.00
   -4    3   17      1.86      0.00
   -3    3   17      0.93      0.00
   -2    3   17      0.32      0.00
   -1    3   17      0.77      0.00
    0    3   17      0.59      0.00
    1    3   17      0.29      0.00
    2    3   17      0.04      0.00
    3    3   17     -1.69      0.00
   -7    4   17     -2.94      0.00
   -6    4   17     -1.39      0.00
   -5    4   17      1.72      0.00
   -4    4   17      1.37      0.00
   -3    4   17     -0.23      0.00
   -2    4   17      0.06      0.00
   -1    4   17      0.22      0.00
    0    4   17     -0.27      0.00
    1    4   17      0.06      0.00
    2    4   17     -0.05      0.00
    3    4   17     -1.12      0.00
   -6    5   17      0.78      0.00
   -5    5   17      1.34      0.00
   -4    5   17     -0.28      0.00
   -3    5   17     -0.15      0.00
   -2    5   17      0.46      0.00
   -1    5   17     -0.59      0.00
    0    5   17     -0.90      0.00
    1    5   17      0.17      0.00
   -6    6   17      0.74      0.00
   -5    6   17     -0.44      0.00
   -4    6   17     -0.13      0.00
   -3    6   17      1.35      0.00
   -2    6   17      0.71      0.00
   -1    6   17     -0.87      0.00
    0    6   17     -0.83      0.00
   -4    7   17      0.36      0.00
   -3    7   17      1.11      0.00
    0    0   18      2.16      0.00
   -1    1   18      1.49      0.00
    0    1   18      1.32      0.00
    1    1   18      0.60      0.00
   -3    2   18     -0.44      0.00
   -2    2   18      0.37      0.00
   -1    2   18      0.17      0.00
    0    2   18     -0.33      0.00
    1    2   18     -0.59      0.00
    2    2   18     -1.02      0.00
   -5    3   18     -0.35      0.00
   -4    3   18     -1.25      0.00
   -3    3   18     -0.18      0.00
   -2    3   18      0.14      0.00
   -1    3   18     -0.64      0.00
    0    3   18     -0.80      0.00
    1    3   18     -0.72      0.00
    2    3   18     -0.38      0.00
    3    3   18      1.58      0.00
   -6    4   18      1.39      0.00
   -5    4   18     -1.15      0.00
   -4    4   18     -0.56      0.00
   -3    4   18      0.85      0.00
   -2    4   18      0.32      0.00
   -1    4   18     -0.11      0.00
    0    4   18      0.20      0.00
    1    4   18     -0.10      0.00
    2    4   18      0.23      0.00
   -6    5   18     -0.58      0.00
   -5    5   18     -1.08      0.00
   -4    5   18      0.52      0.00
   -3    5   18      0.49      0.00
   -2    5   18     -0.11      0.00
   -1    5   18      0.78      0.00
    0    5   18      1.07      0.00
    1    5   18      0.18      0.00
   -5    6   18      0.15      0.00
   -4    6   18      0.12      0.00
   -3    6   18     -0.98      0.00
   -2    6   18     -0.25      0.00
   -1    6   18      1.21      0.00
    0    0   19     -1.96      0.00
   -1    1   19     -1.13      0.00
    0    1   19     -0.85      0.00
    1    1   19      0.06      0.00
   -3    2   19      0.88      0.00
   -2    2   19     -0.05      0.00
   -1    2   19      0.37      0.00
    0    2   19      1.12      0.00
    1    2   19      1.58      0.00
    2    2   19      1.91      0.00
   -5    3   19      1.21      0.00
   -4    3   19      1.30      0.00
   -3    3   19      0.08      0.00
   -2    3   19      0.12      0.00
   -1    3   19      1.21      0.00
    0    3   19      1.62      0.00
    1    3   19      1.72      0.00
    2    3   19      1.42      0.00
   -5    4   19      1.30      0.00
   -4    4   19      0.38      0.00
   -3    4   19     -0.74      0.00
   -2    4   19      0.02      0.00
   -1    4   19      0.59      0.00
    0    4   19      0.43      0.00
    1    4   19      0.78      0.00
   -4    5   19     -0.10      0.00
   -3    5   19     -0.11      0.00
   -2    5   19      0.38      0.00
   -1    5   19     -0.39      0.00
    0    0   20      1.49      0.00
   -1    1   20      0.77      0.00
    0    1   20      0.47      0.00
    1    1   20     -0.30      0.00
   -3    2   20     -0.67      0.00
   -2    2   20      0.11      0.00
   -1    2   20     -0.44      0.00
    0    2   20     -1.21      0.00
    1    2   20     -1.60      0.00
    2    2   20     -1.71      0.00
   -4    3   20     -0.64      0.00
   -3    3   20      0.52      0.00
   -2    3   20      0.16      0.00
   -1    3   20     -1.00      0.00
    0    3   20     -1.42      0.00
    1    3   20     -1.55      0.00
   -4    4   20      0.33      0.00
   -3    4   20      1.04      0.00
   -2    4   20      0.17      0.00
   -1    4   20     -0.37      0.00
    0    4   20     -0.23      0.00
    0    0   21     -0.75      0.00
   -1    1   21     -0.25      0.00
    0    1   21     -0.05      0.00
    1    1   21      0.53      0.00
   -3    2   21      0.60      0.00
   -2    2   21      0.01      0.00
   -1    2   21      0.43      0.00
    0    2   21      1.05      0.00
    1    2   21      1.39      0.00
   -2    3   21     -0.29      0.00
   -1    3   21      0.63      0.00
    0   10    0      1.65      0.00
  -10   11    0      1.19      0.00
   -9   11    0      0.73      0.00
   -2   11    0     -0.94      0.00
   -1   11    0     -0.04      0.00
    0   11    0      0.22      0.00
    0    0    1    -39.59      0.00
    6    6    1      0.35      0.00
    5    7    1      0.39      0.00
    6    7    1     -0.05      0.00
    4    8    1      0.61      0.00
    5    8    1     -0.07      0.00
  -11    9    1      0.10      0.00
    2    9    1     -0.45      0.00
    3    9    1     -0.03      0.00
    4    9    1     -0.23      0.00
  -11   10    1     -0.22      0.00
  -10   10    1     -1.95      0.00
    0   10    1     -1.38      0.00
    1   10    1     -1.01      0.00
    2   10    1     -0.38      0.00
  -11   11    1     -0.40      0.00
  -10   11    1     -1.32      0.00
   -9   11    1     -0.89      0.00
   -2   11    1      1.64      0.00
   -1   11    1      0.13      0.00
    0   11    1     -0.22      0.00
    1   11    1      0.06      0.00
    6    6    2      0.12      0.00
    5    7    2     -0.33      0.00
    6    7    2      0.20      0.00
    4    8    2     -1.22      0.00
    5    8    2     -0.01      0.00
  -11    9    2      0.31      0.00
    2    9    2     -0.28      0.00
    3    9    2     -0.73      0.00
    4    9    2     -0.10      0.00
  -11   10    2      0.03      0.00
  -10   10    2      1.42      0.00
    0   10    2      1.06      0.00
    1   10    2      0.54      0.00
    2   10    2     -0.13      0.00
  -11   11    2      0.09      0.00
  -10   11    2      0.82      0.00
   -9   11    2      0.29      0.00
   -2   11    2     -1.58      0.00
   -1   11    2     -0.01      0.00
    0   11    2      0.13      0.00
    1   11    2     -0.27      0.00
    6    6    3     -0.57      0.00
    5    7    3      0.22      0.00
    6    7    3     -0.37      0.00
  -11    8    3     -0.25      0.00
    3    8    3      2.45      0.00
    4    8    3      1.63      0.00
    5    8    3      0.05      0.00
  -11    9    3     -0.37      0.00
    2    9    3      1.15      0.00
    3    9    3      1.31      0.00
    4    9    3      0.27      0.00
  -11   10    3      0.07      0.00
  -10   10    3     -0.93      0.00
    0   10    3     -0.59      0.00
    1   10    3      0.10      0.00
    2   10    3      0.53      0.00
  -11   11    3     -0.15      0.00
  -10   11    3     -0.73      0.00
   -9   11    3     -0.15      0.00
   -8   11    3      0.17      0.00
   -3   11    3      1.77      0.00
   -2   11    3      1.03      0.00
   -1   11    3     -0.12      0.00
    0   11    3      0.04      0.00
    1   11    3      0.37      0.00
    6    6    4      1.22      0.00
    5    7    4      0.27      0.00
    6    7    4      0.67      0.00
  -11    8    4      0.06      0.00
    3    8    4     -2.52      0.00
    4    8    4     -1.36      0.00
    5    8    4      0.13      0.00
  -11    9    4     -0.06      0.00
    2    9    4     -1.52      0.00
    3    9    4     -1.27      0.00
  -11   10    4     -0.66      0.00
  -10   10    4     -0.35      0.00
    0   10    4      0.39      0.00
    1   10    4     -0.46      0.00
    2   10    4     -0.58      0.00
  -11   11    4     -0.33      0.00
  -10   11    4     -0.01      0.00
   -9   11    4     -0.53      0.00
   -8   11    4     -0.74      0.00
   -3   11    4     -0.72      0.00
   -2   11    4     -0.05      0.00
   -1   11    4      0.46      0.00
    0   11    4     -0.01      0.00
    6    6    5     -1.16      0.00
    5    7    5     -0.22      0.00
    6    7    5     -0.48      0.00
  -11    8    5     -0.30      0.00
    3    8    5      2.60      0.00
    4    8    5      1.19      0.00
    5    8    5     -0.03      0.00
  -11    9    5     -0.03      0.00
    2    9    5      2.01      0.00
    3    9    5      1.24      0.00
  -11   10    5      0.63      0.00
  -10   10    5      0.78      0.00
    0   10    5      0.12      0.00
    1   10    5      0.96      0.00
    2   10    5      0.68      0.00
  -11   11    5      0.17      0.00
  -10   11    5     -0.20      0.00
   -9   11    5     -0.01      0.00
   -8   11    5      0.09      0.00
   -3   11    5      0.00      0.00
   -2   11    5     -0.44      0.00
   -1   11    5     -0.39      0.00
    0   11    5      0.18      0.00
  -11    6    6      0.76      0.00
    5    6    6      1.11      0.00
    6    6    6      0.89      0.00
  -11    7    6      0.35      0.00
    4    7    6     -0.40      0.00
    5    7    6      0.31      0.00
    6    7    6      0.24      0.00
  -11    8    6      0.62      0.00
    3    8    6     -1.82      0.00
    4    8    6     -0.56      0.00
  -11    9    6     -0.04      0.00
  -10    9    6     -1.69      0.00
    1    9    6     -1.17      0.00
    2    9    6     -1.68      0.00
    3    9    6     -0.69      0.00
  -11   10    6     -1.03      0.00
  -10   10    6     -1.65      0.00
   -9   10    6     -1.20      0.00
   -1   10    6      1.18      0.00
    0   10    6     -0.06      0.00
    1   10    6     -0.77      0.00
    2   10    6     -0.33      0.00
  -11   11    6     -0.65      0.00
  -10   11    6     -0.25      0.00
   -9   11    6     -0.07      0.00
   -8   11    6     -0.11      0.00
   -7   11    6      0.02      0.00
   -6   11    6     -0.45      0.00
   -5   11    6     -1.11      0.00
   -4   11    6     -0.80      0.00
   -3   11    6      0.10      0.00
   -2   11    6      0.61      0.00
   -1   11    6      0.46      0.00
    0   11    6      0.04      0.00
  -11    6    7     -0.28      0.00
    5    6    7     -0.44      0.00
    6    6    7     -0.16      0.00
  -11    7    7     -0.62      0.00
    4    7    7      0.30      0.00
    5    7    7      0.09      0.00
  -11    8    7     -1.26      0.00
    3    8    7      1.48      0.00
    4    8    7      0.48      0.00
  -11    9    7     -0.54      0.00
  -10    9    7      1.22      0.00
    1    9    7      1.30      0.00
    2    9    7      1.63      0.00
    3    9    7      0.65      0.00
  -11   10    7      0.64      0.00
  -10   10    7      1.26      0.00
[truncated: 1,567,104 more chars]
